# Supplementary material for: Dimerization of aldosuloses and aldonolactones into branched higher carbon sugars
Source: Royal Society of Chemistry journal article supplement (doi:10.1039/c9cc09093b), 2020-01-01

## Supplementary information

### Dimerization of aldoses and aldolactones into branched higher carbon sugars

Yachen Zhao,<sup>a</sup> Shengyang Wang,<sup>b</sup> and Biao Yu<sup>a,c\*</sup>

<sup>a</sup>State Key Laboratory of Bioorganic and Natural Products Chemistry, Center for Excellence in Molecular Synthesis, Shanghai Institute of Organic Chemistry, University of Chinese Academy of Sciences, Chinese Academy of Sciences, 345 Lingling Road, Shanghai 200032, China. E-mail: byu@sioac.ac.cn (Biao Yu)

<sup>b</sup>Innovation Research Institute of Traditional Chinese Medicine, Shanghai University of Traditional Chinese Medicine, 1200 Cai Lun Road, Shanghai 201203, China

<sup>c</sup>School of Chemistry and Material Sciences, Hangzhou Institute for Advanced Study, University of Chinese Academy of Sciences, 1 Sub-lane Xiangshan, Hangzhou 310024, China

#### General remarks

All reactions were carried out under argon with anhydrous solvents in flame-dried glassware, unless otherwise noted. Commercial reagents were used without further purification unless specialized. Analytical thin-layer chromatography was performed using silica gel 60 F254 glass plates. Compound spots were visualized by UV light (254 nm) or by heating with a solution with 10% H<sub>2</sub>SO<sub>4</sub> in ethanol. Flash column chromatography was performed on SiliaFlash® P60 silica gel. <sup>1</sup>H, <sup>13</sup>C, COSY, HSQC, HMBC, and NOESY NMR spectra were recorded with Bruker AMX 400, Agilent 500/54, and Agilent 600 spectrometers. <sup>1</sup>H and <sup>13</sup>C NMR signals were calibrated to the residual proton and carbon resonance of the solvent: CDCl<sub>3</sub> (<sup>1</sup>H NMR  $\delta$  = 7.26 ppm, <sup>13</sup>C NMR  $\delta$  = 77.16 ppm), (CD<sub>3</sub>)<sub>2</sub>CO (<sup>1</sup>H NMR  $\delta$  = 2.05 ppm, <sup>13</sup>C NMR  $\delta$  = 29.84 ppm). Peak and coupling constant assignments are based on <sup>1</sup>H NMR, <sup>1</sup>H–<sup>1</sup>H COSY, and <sup>1</sup>H–<sup>13</sup>C HSQC experiments. Splitting patterns are indicated as s (singlet), d (doublet), t (triplet), q (quartet), and brs (broad singlet) for <sup>1</sup>H NMR data. ESI-MS and MALDI-MS were recorded with IonSpec 4.7 Tesla FTMS or APEXIII 7.0 TESLA FTMS. Optical rotations were measured using a JASCO P-1030 polarimeter or Anton Paar MCP 5500, and the wavelength was 589 nm (sodium D-line). Single crystal X-ray

diffraction data were collected on Bruker D8 VENTURE.

### Preparation of aldulose derivatives 1-6 and aldonolactone derivatives 7-11

Compounds **S1-S4** and **11** are commercially available. Compounds **1-8**, **10** and **11** are known compounds; the  $^1\text{H}$  NMR spectra of the synthetic compounds were identical to those reported in the literatures.

#### 5-*O*-*tert*-Butyldiphenylsilyl-1,2-*O*-isopropylidene- $\beta$ -L-threo-pentofuranos-3-ulose (1)

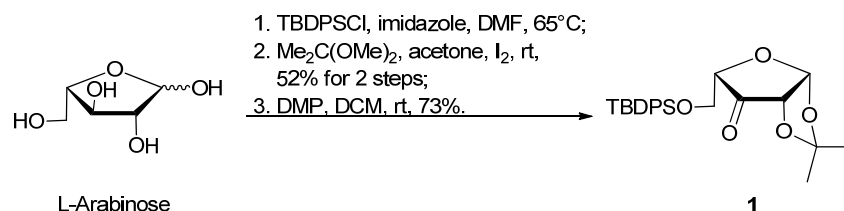

Compound **1** was prepared according to the literature procedure:<sup>S1</sup>  $^1\text{H}$  NMR (400 MHz, CDCl<sub>3</sub>)  $\delta$  7.73–7.66 (m, 4H, TBDPS), 7.43–7.36 (m, 6H, TBDPS), 6.02 (d,  $J_{1,2} = 4.3$  Hz, 1H, H-1), 4.38 (d,  $J_{2,1} = 4.3$  Hz, 1H, H-2), 4.28 (dd,  $J_{4,5} = 6.2, 4.2$  Hz, 1H, H-4), 3.93 (m, 2H, H-5), 1.37 (s, 3H, isopropylidene), 1.35 (s, 3H, isopropylidene), 1.06 (s, 9H, TBDPS).

#### 5-*O*-Benzoyl-1,2-*O*-isopropylidene- $\alpha$ -D-erythro-pentofuranos-3-ulose (2)

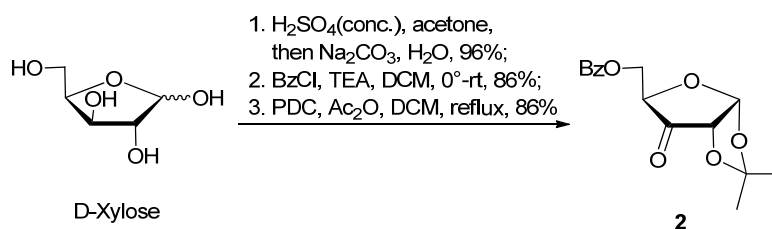

Compound **2** was prepared according to the literature procedure:<sup>S2</sup>  $^1\text{H}$  NMR (500 MHz, CDCl<sub>3</sub>)  $\delta$  8.04–7.86 (m, 2H, Bz), 7.58 (t,  $J = 7.4$  Hz, 1H, Bz), 7.45 (t,  $J = 7.8$  Hz, 2H, Bz), 6.14 (d,  $J_{1,2} = 4.4$  Hz, 1H, H-1), 4.71 (m, 2H, H-2 and H-4), 4.51–4.41 (m, 2H, H-5), 1.52 (s, 3H, isopropylidene), 1.44 (s, 3H, isopropylidene).

### 5-*O*-Benzyl-1,2-*O*-isopropylidene- $\alpha$ -D-erythro-pentofuranos-3-ulose (**3**)

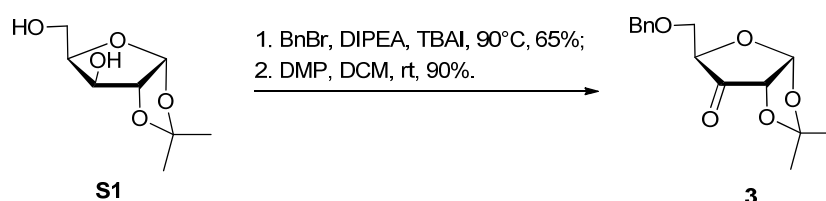

Compound **3** was prepared according to the literature procedure:<sup>S3</sup>  $^1\text{H}$  NMR (400 MHz,  $\text{CDCl}_3$ )  $\delta$  7.30 (m, 5H, Bn), 6.13 (d,  $J_{1,2} = 4.5$  Hz, 1H, H-1), 4.56–4.47 (m, 2H, Bn), 4.45 (s, 1H, H-4), 4.35 (d,  $J_{2,1} = 4.4$  Hz, 1H, H-2), 3.73 (d,  $J_{5,5} = 2.4$  Hz, 2H, H-5), 1.46 (s, 3H, isopropylidene), 1.43 (s, 3H, isopropylidene).

### 5-*O*-*tert*-Butyldimethylsilyl-1,2-*O*-isopropylidene- $\alpha$ -D-erythro-pentofuranos-3-ulose **4**

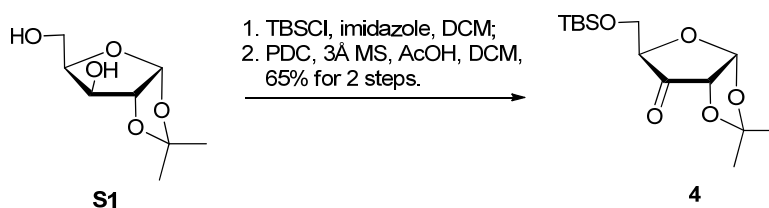

Compound **4** was prepared according to the literature procedure:<sup>S4</sup>  $^1\text{H}$  NMR (500 MHz,  $\text{CDCl}_3$ )  $\delta$  6.13 (d,  $J_{1,2} = 4.5$  Hz, 1H, H-1), 4.36 (m, 1H, H-4), 4.27 (dd,  $J = 4.5, 0.9$  Hz, 1H, H-2), 3.88 (m, 1H, H-5a), 3.81 (m, 1H, H-5b), 1.45 (s, 3H, isopropylidene), 1.44 (s, 3H, isopropylidene), 0.86 (s, 9H, TBS), 0.05 (s, 3H, TBS), 0.03 (s, 3H, TBS).

### 1,6-Anhydro-3,4-*O*-isopropylidene- $\beta$ -D-lyxo-hexopyranos-2-ulose (**5**)

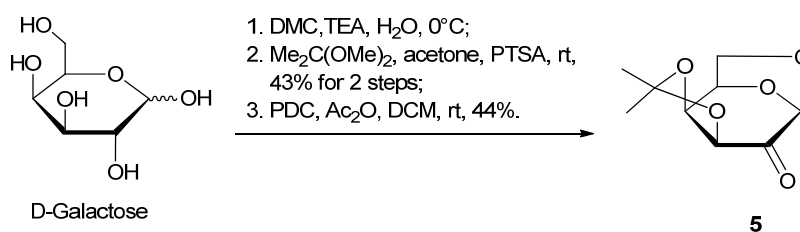

Compound **5** was prepared according to the literature procedure:<sup>S5</sup>  $[\alpha]^{25}_{\text{D}} = -69.5$  ( $c$  0.6,  $\text{CHCl}_3$ );  $^1\text{H}$  NMR (500 MHz,  $\text{CDCl}_3$ )  $\delta$  5.17 (s, 1H, H-1), 4.77 (m, 2H, H-3 and H-5), 4.43 (d,  $J_{4,5} = 7.7$  Hz, 1H, H-4), 4.24 (d,  $J_{5,6a} = 7.8$  Hz, 1H, H-6a), 3.79–3.71 (m, 1H,

H-6b), 1.51 (s, 3H, isopropylidene), 1.36 (s, 3H, isopropylidene);  $^{13}\text{C}$  NMR (126 MHz,  $\text{CDCl}_3$ )  $\delta$  195.9 (C-2), 112.0, 98.3 (C-1), 74.1, 73.3, 71.8, 62.9, 25.7, 24.2; HRMS (ESI)  $m/z$  calcd for  $\text{C}_{10}\text{H}_{16}\text{O}_6\text{Na}$   $[\text{M}+\text{MeOH}+\text{Na}]^+$  255.0839, found 255.0842.

### 1,6-Anhydro-2,3-*O*-isopropylidene- $\beta$ -D-lyxo-hexopyranos-4-ulose (6)

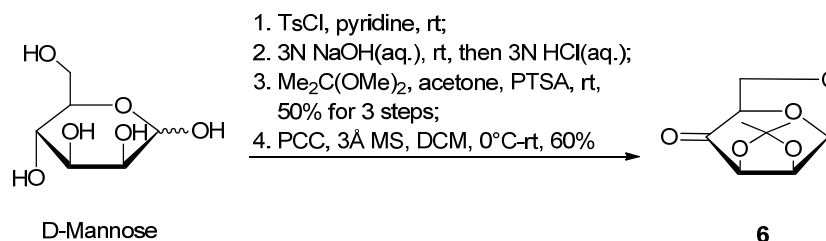

Compound **6** was prepared according to the literature procedure:<sup>S6</sup>  $^1\text{H}$  NMR (500 MHz,  $\text{CDCl}_3$ )  $\delta$  5.63 (s, 1H, H-1), 4.59 (d,  $J_{5,6b} = 4.8$  Hz, 1H, H-5), 4.53–4.41 (m, 2H, H-2 and H-3), 4.03 (d,  $J_{5,6a} = 7.7$  Hz, 1H, H-6a), 3.93–3.85 (m, 1H, H-6b), 1.50 (s, 3H, isopropylidene), 1.34 (s, 3H, isopropylidene).

### 2,3:5,6-Di-*O*-isopropylidene-D-mannono-1,4-lactone (7)

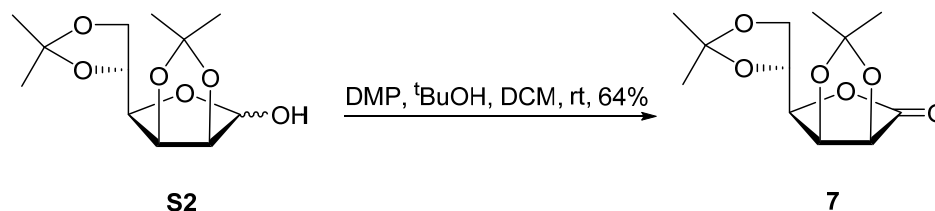

Compound **7** was prepared according to the literature procedure:<sup>S7</sup>  $^1\text{H}$  NMR (500 MHz,  $\text{CDCl}_3$ )  $\delta$  4.88 (dd,  $J_{2,3/3,4} = 5.2, 3.4$  Hz, 1H, H-3), 4.83 (d,  $J_{2,3} = 5.3$  Hz, 1H, H-2), 4.44 (ddd,  $J_{4,5/5,6a/5,6b} = 8.1, 6.0, 3.9$  Hz, 1H, H-5), 4.37 (dd,  $J_{4,5/3,4} = 8.1, 3.4$  Hz, 1H, H-4), 4.15 (dd,  $J_{5,6/6a,6b} = 9.2, 6.0$  Hz, 1H, H-6a), 4.08 (dd,  $J_{5,6/6a,6b} = 9.2, 3.9$  Hz, 1H, H-6b), 1.49 (s, 3H, isopropylidene), 1.47 (s, 3H, isopropylidene), 1.43 (s, 3H, isopropylidene), 1.40 (s, 3H, isopropylidene).

### 2,3:5,6-Di-*O*-isopropylidene-L-gulono-1,4-lactone (8)

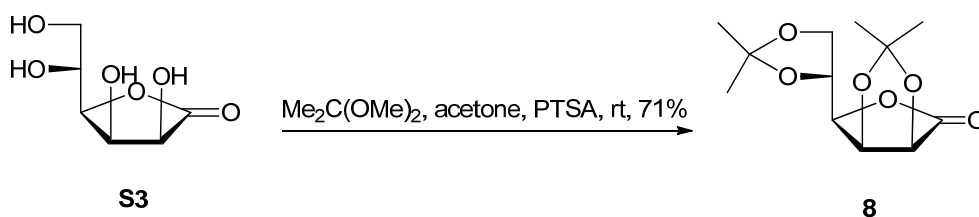

Compound **8** was prepared according to the literature procedure:<sup>S8</sup> <sup>1</sup>H NMR (500 MHz, CDCl<sub>3</sub>) δ 4.83 (d,  $J_{2,3} = 5.6$  Hz, 1H, H-2), 4.74 (dd,  $J_{2,3/3,4} = 5.6, 3.4$  Hz, 1H, H-3), 4.42 (m, 2H, H-6a and H-6b), 4.21 (m, 1H, H-4), 3.84–3.79 (m, 1H, H-5), 1.46 (m, 6H, isopropylidene), 1.38 (s, 3H, isopropylidene), 1.37 (s, 3H, isopropylidene).

### 2,3-*O*-Isopropylidene-5-*O*-triisopropylsilyl-D-lyxono-1,4-lactone (**9**)

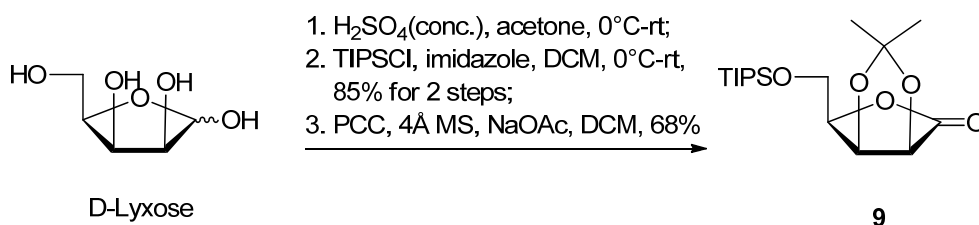

To a stirred suspension of D-lyxose (5.052 g, 33.67 mmol) in anhydrous acetone (168 mL, 0.2 M), was added dropwise conc. H<sub>2</sub>SO<sub>4</sub> (0.18 mL, 3.36 mmol) at 0 °C. After stirring at 0 °C for 10 min, the mixture was stirred at RT overnight until a clear solution was achieved. The mixture was neutralized with solid Na<sub>2</sub>CO<sub>3</sub> (1.414 g, 13.34 mmol) at 0 °C. The solid was filtered through a short pad of Celite, and the Celite pad was washed with ethyl acetate. The filtrate was dried with anhydrous Na<sub>2</sub>SO<sub>4</sub> and concentrated under reduced pressure to give a colourless syrup.

To a stirred solution of the above syrup and imidazole (4.584 g, 67.34 mmol) in anhydrous CH<sub>2</sub>Cl<sub>2</sub> (224 mL, 0.15 M), was added chlorotriisopropylsilane (8.07 mL, 37.71 mmol) at 0 °C. After 10 minutes, the mixture was stirred for additional 1.5 h at RT. The mixture was carefully quenched with dry MeOH (2.2 mL) to consume the remaining chlorotriisopropylsilane, and was then concentrated in vacuo. The resulting residue was dissolved in CH<sub>2</sub>Cl<sub>2</sub> and then successively washed with 1N cold aqueous HCl, saturated aqueous NaHCO<sub>3</sub>, and brine. The organic layer was dried over anhydrous Na<sub>2</sub>SO<sub>4</sub> and concentrated under reduced pressure. The resulting brown syrup was purified by flash column chromatography on silica (petroleum ether/EtOAc, 10:1) to give the corresponding 5-*O*-silyl ether (9.86 g, 85% for 2 steps) as a white solid.

To a stirred solution of the above silyl ether (3.866 g, 11.16 mmol) and 4Å MS (1.208 g) in anhydrous CH<sub>2</sub>Cl<sub>2</sub> (75 mL), were added sodium acetate (5.489 g, 66.91 mmol) and pyridinium chlorochromate (9.617 g, 44.62 mmol) at RT. The mixture was stirred for 1 day at RT. The solid was filtered out through a short pad of Celite, and the Celite pad was washed with petroleum ether/ethyl acetate (1:1). The resulting brown syrup was purified by flash column chromatography on silica (petroleum ether/EtOAc, 15:1) to give lactone **9** (2.625 g, 68%) as a white solid:<sup>S9</sup> [α]<sup>25</sup><sub>D</sub> = 34.1 (*c* 1.3, CHCl<sub>3</sub>); <sup>1</sup>H NMR (500 MHz, CDCl<sub>3</sub>) δ 4.84–4.80 (m, 2H, H-2 and H-3), 4.54 (m, 1H, H-4), 4.11– 4.00 (m, 2H, H-5a and H-5b), 1.46 (s, 3H, isopropylidene), 1.39 (s, 3H, isopropylidene), 1.17–1.05 (m, 21H, TIPS); <sup>13</sup>C NMR (126 MHz, CDCl<sub>3</sub>) δ 173.9, 114.2, 79.6, 76.2, 75.9, 61.3, 27.0, 26.0, 18.0, 12.1; HRMS (ESI) *m/z* calcd for C<sub>17</sub>H<sub>33</sub>O<sub>5</sub>Si [M+H]<sup>+</sup> 345.2092, found 345.2096.

### 2,3:5,6-Di-*O*-isopropylidene-D-gulono-1,4-lactone (**10**)

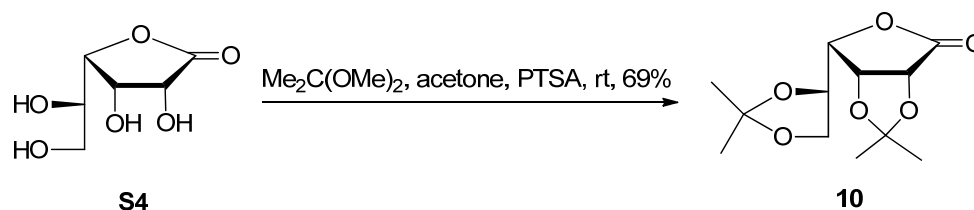

Compound **10** was prepared according to the literature procedure:<sup>S10</sup> <sup>1</sup>H NMR (500 MHz, CDCl<sub>3</sub>) δ 4.83 (d, *J*<sub>2,3</sub> = 5.6 Hz, 1H, H-2), 4.74 (dd, *J*<sub>2,3/3,4</sub> = 5.6, 3.6 Hz, 1H, H-3), 4.47–4.40 (m, 2H, H-6a and H-6b), 4.22 (m, 1H, H-4), 3.82 (m, 1H, H-5), 1.47 (s, 3H, isopropylidene), 1.47 (s, 3H, isopropylidene), 1.40 (s, 3H, isopropylidene), 1.38 (s, 3H, isopropylidene).

**5-*O*-*tert*-Butyldiphenylsilyl-3-C-(5-*O*-*tert*-butyldiphenylsilyl-1,2-*O*-isopropylidene-β-L-threo-pentofuranos-3-ulose-4-yl)-1,2-*O*-isopropylidene-β-L-lyxofuranose (**1a**) and 5-*O*-*tert*-Butyldiphenylsilyl-3-C-(5-*O*-*tert*-butyldiphenylsilyl-1,2-*O*-isopropylidene-β-L-threo-pentofuranos-3-ulose-2-yl)-1,2-*O*-isopropylidene-β-L-lyxofuranose (**1b**)**

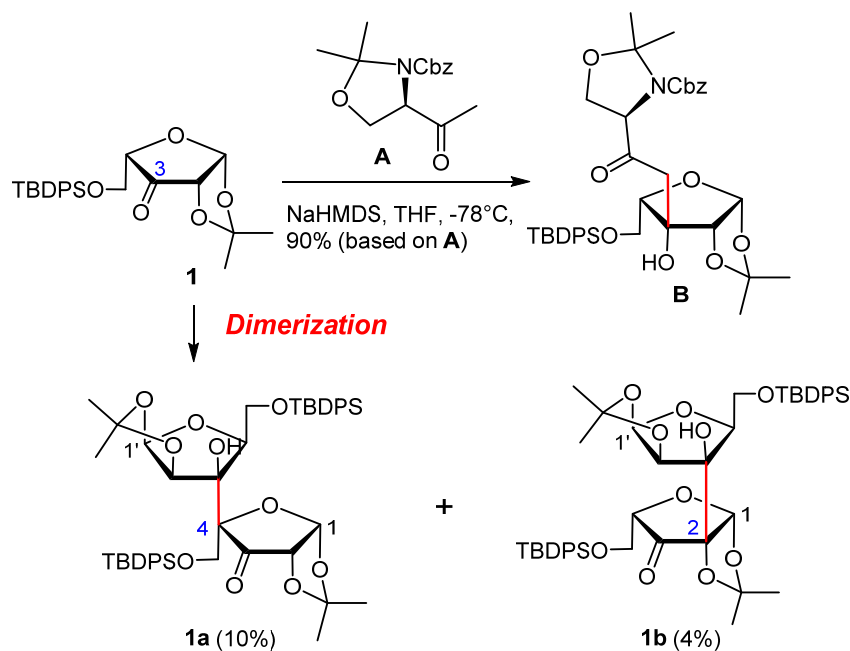

The preparative procedure was reported in the total synthesis of the proposed amipurimycin.<sup>S11</sup> These side products were purified by silica gel column chromatography (petroleum ether/EtOAc, 20:1), providing **1a** (1.62 g, 10%) and **1b** (0.65 g, 4%) as white solids.

**1a**:  $[\alpha]_{\text{D}}^{25} = 19.8$  (*c* 1.0,  $\text{CHCl}_3$ );  $^1\text{H NMR}$  (500 MHz,  $\text{CDCl}_3$ )  $\delta$  7.80–7.72 (m, 6H, TBDPS), 7.70 (dd,  $J = 7.8, 1.5$  Hz, 2H, TBDPS), 7.48–7.38 (m, 12H, TBDPS), 6.08 (d,  $J_{1,2} = 4.1$  Hz, 1H, H-1), 5.59 (d,  $J_{1',2'} = 4.0$  Hz, 1H, H-1'), 5.01 (d,  $J_{1',2'} = 4.0$  Hz, 1H, H-2'), 4.62 (t,  $J_{4',5'} = 6.1$  Hz, 1H, H-4'), 4.43 (d,  $J_{1,2} = 4.1$  Hz, 1H, H-2), 4.11–4.02 (m, 2H, H-5a' and OH), 3.91 (d,  $J_{5a,5b} = 11.8$  Hz, 1H, H-5a), 3.86–3.77 (m, 2H, H-5b and H-5b'), 1.40 (s, 3H, isopropylidene), 1.36 (s, 3H, isopropylidene), 1.33 (s, 3H, isopropylidene), 1.31 (s, 3H, isopropylidene), 1.12 (s, 9H, TBDPS), 1.10 (s, 9H, TBDPS);  $^{13}\text{C NMR}$  (126 MHz,  $\text{CDCl}_3$ )  $\delta$  207.7 (C-3), 135.8, 135.8, 135.7, 135.6, 133.1, 132.9, 132.4, 132.2, 130.0, 129.9, 129.8, 127.9, 127.8, 127.8, 127.8, 115.6, 112.9, 105.3 (C-1'), 103.3 (C-1), 89.4 (C-3'), 83.6 (C-4), 82.3 (C-4'), 79.0 and 79.0 (C-2 and C-2'), 64.5 (C-5), 64.1 (C-5'), 27.7, 27.2, 27.0, 26.8, 26.6, 26.3, 19.2, 19.2; HRMS (ESI)  $m/z$  calcd for  $\text{C}_{48}\text{H}_{60}\text{O}_{10}\text{Si}_2\text{Na}$   $[\text{M}+\text{Na}]^+$  875.3617, found 875.3623.

**1b**:  $[\alpha]_{\text{D}}^{25} = -17.9$  (*c* 1.0,  $\text{CHCl}_3$ );  $^1\text{H NMR}$  (500 MHz,  $\text{CDCl}_3$ )  $\delta$  7.75 (d,  $J = 7.6$  Hz, 2H, TBDPS), 7.70 (d,  $J = 7.1$  Hz, 6H, TBDPS), 7.35–7.44 (m, 12H, TBDPS), 6.01 (s, 1H, H-1), 5.68 (d,  $J_{1',2'} = 3.9$  Hz, 1H, H-1'), 4.60 (t,  $J_{4',5'} = 5.1$  Hz, 1H, H-4'), 4.52 (d,  $J_{1',2'} = 3.8$  Hz, 1H, H-2'), 4.39 (s, 1H, OH), 4.27 (t,  $J_{4,5} = 4.0$  Hz, 1H, H-4), 4.02 (dd,  $J_{5a',5b'}/4',5'} = 11.1, 5.3$  Hz, 1H, H-5a'), 3.96 (d,  $J_{4,5} = 3.1$  Hz, 1H, H-5a), 3.92 (d,  $J_{4,5} =$

5.0 Hz, 1H, H-5b), 3.82 (d,  $J_{4',5'} = 5.4$  Hz, 1H, H-5b'), 1.48 (s, 3H, isopropylidene), 1.45 (s, 3H, isopropylidene), 1.43 (s, 3H, isopropylidene), 1.38 (s, 3H, isopropylidene), 1.04 (s, 18H, TBDPS);  $^{13}\text{C}$  NMR (126 MHz,  $\text{CDCl}_3$ )  $\delta$  208.4 (C-3), 135.8, 135.7, 135.6, 135.6, 133.0, 132.8, 132.7, 132.5, 129.8, 129.8, 129.7, 129.7, 127.8, 127.7, 127.7, 127.7, 115.4, 114.0, 104.8 (C-1'), 104.1 (C-1), 86.5 (C-2), 83.0 (C-4), 81.3 (C-2'), 80.4 (C-3'), 64.1 (C-5'), 62.5 (C-5), 28.6, 27.4, 27.2, 26.8, 26.7, 19.2, 19.1; HRMS (ESI)  $m/z$  calcd for  $\text{C}_{48}\text{H}_{60}\text{O}_{10}\text{Si}_2\text{Na}$   $[\text{M}+\text{Na}]^+$  875.3617, found 875.3621.

**5-*O*-*tert*-Butyldiphenylsilyl-3-*C*-(5-*O*-*tert*-butyldiphenylsilyl-1,2-*O*-isopropylidene- $\beta$ -L-threo-pentofuranos-3-ulose-2-yl)-1,2-*O*-isopropylidene- $\beta$ -L-lyxofuranose (1b)**

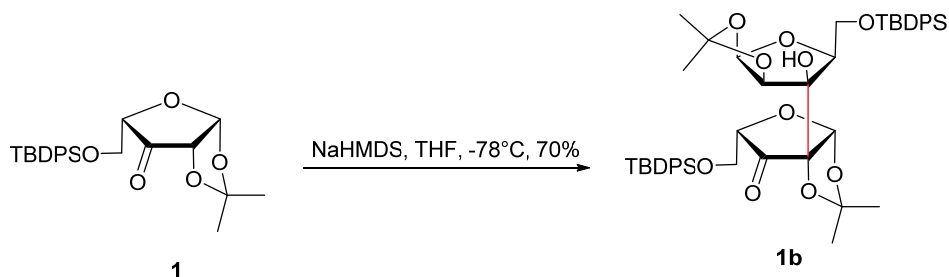

To a solution of **1** (0.222 g, 0.52 mmol) in dry THF (2.3 mL), was added NaHMDS (2.0 M in THF, 0.26 mL) at  $-78^\circ\text{C}$ . The mixture was stirred at the same temperature for 30 mins and TLC (petroleum ether/EtOAc, 6:1) showed the complete consumption of **1**. The reaction was quenched by addition of saturated aq.  $\text{NH}_4\text{Cl}$ . After warming to RT, the mixture was extracted with  $\text{CH}_2\text{Cl}_2$  three times. The combined organic layer was washed with brine, dried over anhydrous  $\text{Na}_2\text{SO}_4$ , and concentrated in vacuo to give a pale yellow oil. Further purification by column chromatography (petroleum ether/EtOAc, 20:1) gave **1b** (0.155 g, 70%) as a white solid.

**5-*O*-*tert*-Butyldiphenylsilyl-3-*C*-(5-deoxy-1,2-*O*-isopropylidene- $\beta$ -L-threo-pent-4-enofuranos-3-ulose-2-yl)-1,2-*O*-isopropylidene- $\beta$ -L-lyxofuranose (1c)**

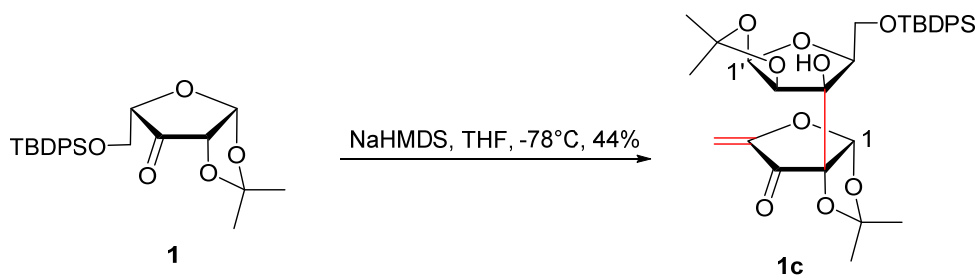

To a solution of NaHMDS (2.0 M, 0.1 mL) in dry THF (0.34 mL), was added a solution



of **1** (0.058 g, 0.13 mmol) in dry THF (0.5 mL) at  $-78\text{ }^{\circ}\text{C}$ . The mixture was stirred at the same temperature for 30 mins and another portion of **1** (0.058 g, 0.13 mmol) in dry THF (0.5 mL) was added to the mixture. After being stirred at the same temperature for 2 h, the reaction was quenched by addition of saturated aq.  $\text{NH}_4\text{Cl}$ . After warming to RT, the mixture was extracted with  $\text{CH}_2\text{Cl}_2$  three times. The combined organic layer was washed with brine, dried over anhydrous  $\text{Na}_2\text{SO}_4$ , and concentrated in vacuo to give a pale yellow oil. Purification by column chromatography (petroleum ether/EtOAc, 25:1) gave **1c** as a colorless oil (0.018 g, 44%):  $[\alpha]_D^{25} = -11.8$  ( $c$  1.0,  $\text{CH}_2\text{Cl}_2$ );  $^1\text{H NMR}$  (600 MHz, acetone- $d_6$ )  $\delta$  7.79 (m, 4H, TBDPS), 7.46–7.41 (m, 6H, TBDPS), 6.16 (s, 1H, H-1), 5.83 (d,  $J_{1',2'} = 4.1$  Hz, 1H, H-1'), 5.07 (d,  $J_{5a,5b} = 2.3$  Hz, 1H, H-5a), 4.77 (d,  $J_{5a,5b} = 2.3$  Hz, 1H, H-5b), 4.72 (dd,  $J_{3',4'/4',5'} = 6.8, 2.8$  Hz, 1H, H-4'), 4.65 (d,  $J_{1',2'} = 4.1$  Hz, 1H, H-2'), 4.51 (s, 1H, OH), 4.05 (m, 1H, H-5a'), 3.88 (m, 1H, H-5b'), 1.54 (s, 3H, isopropylidene), 1.41 (s, 3H, isopropylidene), 1.38 (s, 3H, isopropylidene), 1.37 (s, 3H, isopropylidene), 1.06 (s, 9H, TBDPS);  $^{13}\text{C NMR}$  (151 MHz, acetone- $d_6$ )  $\delta$  198.2 (C-3), 154.6 (C-4), 137.1, 136.9, 134.9, 134.7, 131.2, 131.1, 129.2, 129.1, 117.1, 114.9, 106.5 and 106.4 (C-1/1'), 92.0, 86.7, 84.8, 82.6, 80.7, 66.2, 29.4, 28.0, 27.9, 27.7, 27.6, 20.3; HRMS (ESI)  $m/z$  calcd for  $\text{C}_{32}\text{H}_{40}\text{O}_9\text{SiNa}$   $[\text{M}+\text{Na}]^+$  619.2334, found 619.2342. Compound **1c** was found unstable in  $\text{CDCl}_3$ .

**5-O-Benzoyl-3-C-(5-O-benzoyl-1,2-O-isopropylidene- $\alpha$ -D-erythro-pentofuranos-3-ulose-2-yl)-1,2-O-isopropylidene- $\alpha$ -D-ribofuranose (2a) and 5-O-Benzoyl-3-C-(5-deoxy-1,2-O-isopropylidene- $\alpha$ -D-erythro-pent-4-enofuranos-3-ulose-2-yl)-1,2-O-isopropylidene- $\alpha$ -D-ribofuranose (2b)**

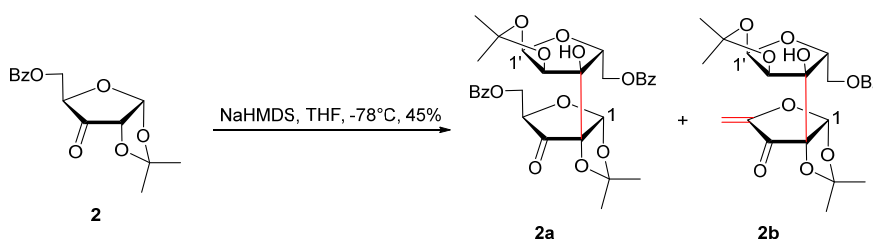

To a solution of **2** (0.303 g, 1.04 mmol) in dry THF (9.9 mL), was added NaHMDS (2.0 M in THF, 0.52 mL) at  $-78\text{ }^{\circ}\text{C}$ . The mixture was stirred at the same temperature for 30 mins and TLC (petroleum ether/EtOAc, 2:1) showed the complete consumption of **2**. The reaction was quenched by addition of saturated aq.  $\text{NH}_4\text{Cl}$ . After warming to RT, the mixture was extracted with  $\text{CH}_2\text{Cl}_2$  three times. The combined organic layer was washed with brine, dried over anhydrous  $\text{Na}_2\text{SO}_4$ , and concentrated in vacuum to give

a pale yellow oil. Purification by column chromatography (petroleum ether/EtOAc, 6:1 and 2:1) gave **2a** (0.009 g, 3%) as a white foam and **2b** (0.105 g, 42%) as a colourless oil.

**2a**:  $[\alpha]_D^{25} = 59.1$  (*c* 1.0, CHCl<sub>3</sub>); <sup>1</sup>H NMR (500 MHz, CDCl<sub>3</sub>)  $\delta$  8.09–8.05 (m, 2H, Bz), 8.03–7.99 (m, 2H, Bz), 7.59–7.50 (m, 2H, Bz), 7.46–7.39 (m, 4H, Bz), 6.10 (s, 1H, H-1), 6.06 (d,  $J_{1',2'} = 4.5$  Hz, 1H, H-1'), 4.84 (d,  $J_{1',2'} = 4.4$  Hz, 1H, H-2'), 4.80 (dd,  $J = 6.9, 3.4$  Hz, 1H), 4.76 (d,  $J = 2.2$  Hz, 1H), 4.68 (s, 1H), 4.63–4.55 (m, 3H), 3.53 (s, 1H, OH), 1.62 (s, 3H, isopropylidene), 1.47 (s, 3H, isopropylidene), 1.46 (s, 3H, isopropylidene), 1.40 (s, 3H, isopropylidene); <sup>13</sup>C NMR (126 MHz, CDCl<sub>3</sub>)  $\delta$  195.2(C-3), 166.5, 166.3, 133.5, 133.4, 130.2, 130.1, 129.9, 129.8, 129.3, 115.3, 105.7(C-1), 105.3(C-1'), 85.2, 80.7, 79.1, 78.7, 77.5, 63.4, 63.2, 28.4, 28.3, 27.5, 27.1; HRMS (ESI) *m/z* calcd for C<sub>30</sub>H<sub>32</sub>O<sub>12</sub>Na [M+Na]<sup>+</sup> 607.1786, found 607.1786.

**2b**:  $[\alpha]_D^{25} = 24.0$  (*c* 1.1, CH<sub>2</sub>Cl<sub>2</sub>); <sup>1</sup>H NMR (600 MHz, acetone-d<sub>6</sub>)  $\delta$  8.03 (dd,  $J = 8.4, 1.3$  Hz, 2H, Bz), 7.67–7.63 (m, 1H, Bz), 7.55–7.51 (m, 2H, Bz), 6.27 (s, 1H, H-1), 5.99 (d,  $J_{1',2'} = 4.4$  Hz, 1H, H-1'), 5.08 (d,  $J_{5a,5b} = 2.3$  Hz, 1H, H-5a), 4.93 (d,  $J_{1',2'} = 4.4$  Hz, 1H, H-2'), 4.77 (d,  $J_{5a,5b} = 2.3$  Hz, 1H, H-5b), 4.77 (s, 1H, OH), 4.66–4.56 (m, 2H, H-5a' and H-5b'), 4.53 (dd,  $J_{4',5'} = 7.7, 3.9$  Hz, 1H, H-4'), 1.55 (s, 3H, isopropylidene), 1.48 (s, 3H, isopropylidene), 1.42 (s, 3H, isopropylidene), 1.37 (s, 3H, isopropylidene); <sup>13</sup>C NMR (151 MHz, acetone-d<sub>6</sub>)  $\delta$  197.2 (C-3), 166.9, 154.3, 134.6, 131.5, 130.9, 130.0, 117.1, 115.2, 106.3 and 106.2 (C-1/1'), 92.6, 86.8, 81.8, 81.4, 64.0, 61.1, 29.5, 28.1, 27.8, 27.4; HRMS (ESI) *m/z* calcd for C<sub>23</sub>H<sub>26</sub>O<sub>10</sub>Na [M+Na]<sup>+</sup> 485.1418, found 485.1419. Compound **2b** was found unstable in CDCl<sub>3</sub>.

**5-O-Benzyl-3-C-(5-O-benzyl-1,2-O-isopropylidene- $\alpha$ -D-erythro-pentofuranos-3-ulose-2-yl)-1,2-O-isopropylidene- $\alpha$ -D-ribofuranose (3a) and 5-O-Benzyl-3-C-(5-O-benzyl-1,2-O-isopropylidene- $\alpha$ -D-erythro-pentofuranos-3-ulose-2-yl)-1,2-O-isopropylidene- $\alpha$ -D-xylofuranose (3b)**

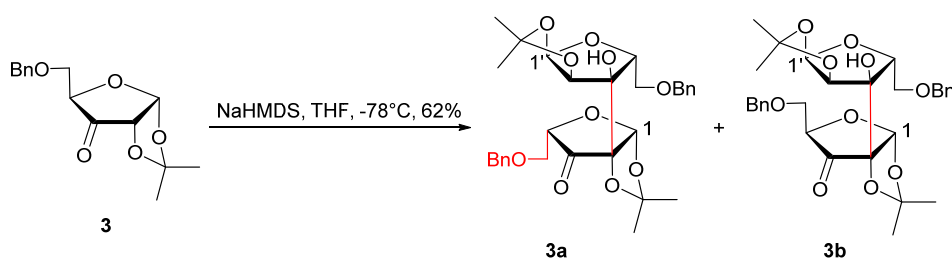

To a solution of **3** (0.347 g, 1.25 mmol) in dry THF (5.9 mL), was added NaHMDS (2.0 M in THF, 0.31 mL) at -78 °C. The mixture was stirred at the same temperature for 30

mins and TLC (petroleum ether/EtOAc, 2:1) showed the complete consumption of **3**. The reaction was quenched by addition of saturated aq. NH<sub>4</sub>Cl. After warming to RT, the mixture was extracted with CH<sub>2</sub>Cl<sub>2</sub> three times. The combined organic layer was washed with brine, dried over anhydrous Na<sub>2</sub>SO<sub>4</sub>, and concentrated in vacuum to give a pale yellow oil. Purification by column chromatography (petroleum ether/EtOAc, 7:1) gave **3a** (0.042 g, 13%) and **3b** (0.170 g, 49%) as white foams.

**3a**: [ $\alpha$ ]<sub>D</sub><sup>25</sup> = 62.7 (*c* 0.7, CHCl<sub>3</sub>); <sup>1</sup>H NMR (500 MHz, CDCl<sub>3</sub>)  $\delta$  7.37–7.28 (m, 10H, Bn), 6.00 (s, 1H, H-1), 5.97 (d, *J*<sub>1',2'</sub> = 4.2 Hz, 1H, H-1'), 4.87 (d, *J*<sub>1',2'</sub> = 4.2 Hz, 1H, H-2'), 4.60–4.50 (m, 4H, Bn), 4.40 (dd, *J*<sub>4,5</sub> = 5.8, 3.6 Hz, 1H, H-4), 4.03 (s, 1H, H-4'), 3.80 (d, *J*<sub>4',5'/5a',5b'</sub> = 3.7 Hz, 2H, H-5'), 3.76–3.69 (m, 2H, H-5), 3.22 (s, 1H, OH), 1.58 (s, 3H, isopropylidene), 1.51 (s, 3H, isopropylidene), 1.50 (s, 3H, isopropylidene), 1.42 (s, 3H, isopropylidene); <sup>13</sup>C NMR (126 MHz, CDCl<sub>3</sub>)  $\delta$  206.0 (C-3), 137.5, 136.9, 128.5, 128.3, 128.2, 128.0, 127.8, 127.7, 115.8, 112.8, 104.8 (C-1), 104.6 (C-1'), 86.1 (C-2), 82.6 (C-4'), 81.8 (C-4), 79.5 (C-3'), 79.4 (C-2'), 73.4 (Bn), 73.3 (Bn), 69.6 (C-5), 66.0 (C-5'), 29.7, 28.6, 27.6, 26.6, 26.3; HRMS (ESI) *m/z* calcd for C<sub>30</sub>H<sub>40</sub>NO<sub>10</sub> [M+NH<sub>4</sub>]<sup>+</sup> 574.2647, found 574.2650.000

**3b**: [ $\alpha$ ]<sub>D</sub><sup>25</sup> = 51.0 (*c* 2.0, CHCl<sub>3</sub>); <sup>1</sup>H NMR (500 MHz, CDCl<sub>3</sub>)  $\delta$  7.34–7.26 (m, 10H, Bn), 6.18 (s, 1H, H-1), 6.00 (d, *J*<sub>1,2</sub> = 4.3 Hz, 1H, H-1'), 4.88 (d, *J*<sub>1,2</sub> = 4.3 Hz, 1H, H-2'), 4.65 (dd, *J*<sub>4,5</sub> = 6.0, 3.0 Hz, 1H, H-4), 4.53 (q, *J* = 12.1 Hz, 2H, Bn), 4.45 (q, *J* = 12.3 Hz, 2H, Bn), 4.17 (s, 1H, H-4'), 3.79 (dd, *J*<sub>4,5/5a,5b</sub> = 11.0, 3.0 Hz, 1H, H-5a), 3.69 (m, 3H, H-5b, H-5a' and H-5b'), 3.32 (s, 1H, OH), 1.58 (s, 3H, isopropylidene), 1.50 (s, 3H, isopropylidene), 1.49 (s, 3H, isopropylidene), 1.41 (s, 3H, isopropylidene); <sup>13</sup>C NMR (126 MHz, CDCl<sub>3</sub>)  $\delta$  206.4(C-3), 137.5, 137.4, 128.4, 127.9, 127.8, 127.8, 127.7, 115.0, 113.0, 104.9 (C-1), 104.7 (C-1'), 85.6 (C-2), 82.8 (C-4'), 80.1 (C-2'), 79.6 (C-3'), 79.2 (C-4), 73.5 (Bn), 73.2 (Bn), 68.4 (C-5), 67.19 (C-5'), 28.3, 28.0, 26.8, 26.4; HRMS (ESI) *m/z* calcd for C<sub>30</sub>H<sub>40</sub>NO<sub>10</sub> [M+NH<sub>4</sub>]<sup>+</sup> 574.2647, found 574.2646.

**5-*O*-*tert*-Butyldimethylsilyl-3-C-(5-*O*-*tert*-butyldimethylsilyl-1,2-*O*-isopropylidene- $\alpha$ -D-erythro-pentofuranos-3-ulose-2-yl)-1,2-*O*-isopropylidene- $\alpha$ -D-ribofuranose (4a)**

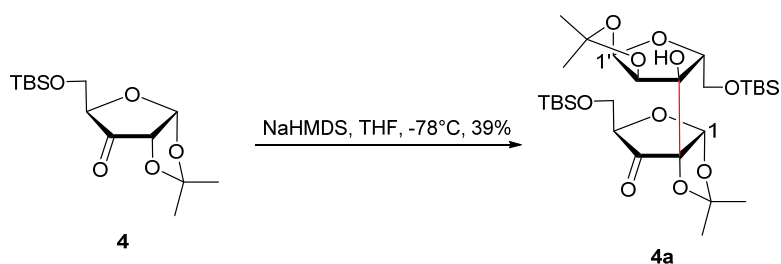

To a solution of **4** (0.128 g, 0.42 mmol) in dry THF (2.0 mL), was added NaHMDS (2.0 M in THF, 0.11 mL) at -78 °C. The mixture was stirred at the same temperature for 30 mins and TLC (petroleum ether/EtOAc, 5:1) showed the complete consumption of **4**. The reaction was quenched by addition of saturated aq. NH<sub>4</sub>Cl. After warming to RT, the mixture was extracted with CH<sub>2</sub>Cl<sub>2</sub> three times. The combined organic layer was washed with brine, dried over anhydrous Na<sub>2</sub>SO<sub>4</sub>, and concentrated in vacuum to give a pale yellow oil. Purification by column chromatography (petroleum ether/EtOAc, 20:1) gave **4a** (0.049 g, 39%) as a white solid:  $[\alpha]_D^{25} = 62.9$  (*c* 1.1, CHCl<sub>3</sub>); <sup>1</sup>H NMR (600 MHz, CDCl<sub>3</sub>) δ 6.24 (s, 1H, H-1), 5.92 (d, *J*<sub>1',2'</sub> = 4.4 Hz, 1H, H-1'), 4.86 (d, *J*<sub>1',2'</sub> = 4.4 Hz, 1H, H-2'), 4.47 (dd, *J*<sub>4,5</sub> = 5.9, 3.5 Hz, 1H, H-4), 4.14 (s, 1H, H-4'), 3.96–3.81 (m, 4H, H-5 and H-5'), 3.24 (s, 1H, OH), 1.59 (s, 3H, isopropylidene), 1.50 (s, 3H, isopropylidene), 1.47 (s, 3H, isopropylidene), 1.40 (s, 3H, isopropylidene), 0.91 (s, 9H, TBS), 0.89 (s, 9H, TBS), 0.09 (s, 3H, TBS), 0.08 (s, 3H, TBS), 0.07 (s, 3H, TBS), 0.07 (s, 3H, TBS); <sup>13</sup>C NMR (151 MHz, CDCl<sub>3</sub>) δ 208.8 (C-3), 114.8, 113.6, 105.0 (C-1 and C-1'), 85.7 (C-2 and C-4'), 81.1 (C-4), 80.6 (C-2'), 80.1 (C-3'), 62.9 (C-5), 61.8 (C-5'), 28.5, 28.4, 27.1, 26.7, 26.2, 26.2, 18.8, 18.5, 1.3, -4.9, -5.0, -5.1, -5.1; HRMS (ESI) *m/z* calcd for C<sub>28</sub>H<sub>52</sub>O<sub>10</sub>Si<sub>2</sub>Na [M+Na]<sup>+</sup> 627.2991, found 627.2996.

**1,6-Anhydro-2-C-(1,6-anhydro-3,4-O-isopropylidene-β-D-lyxo-hexopyranos-2-uloose-3-yl)-3,4-O-isopropylidene-β-D-talopyranose (5a)**

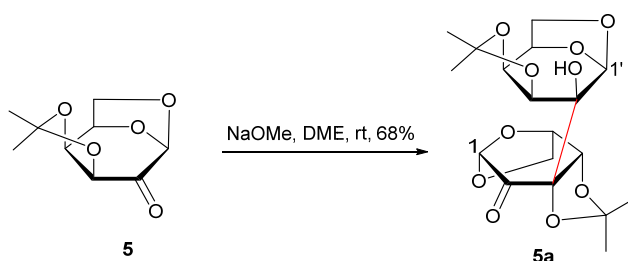

To a solution of **5** (0.208 g, 1.04 mmol) in dry DME (10.0 mL), was added NaOMe (6 mg) at rt. The mixture was stirred at the same temperature for 1h and TLC (petroleum ether/EtOAc, 2:1) showed the complete consumption of **5**. The reaction was quenched

by addition of saturated aq. NH<sub>4</sub>Cl. The mixture was extracted with CH<sub>2</sub>Cl<sub>2</sub> three times. The combined organic layer was washed with brine, dried over anhydrous Na<sub>2</sub>SO<sub>4</sub>, and concentrated in vacuo to give a colourless oil. Purification by column chromatography (petroleum ether/EtOAc, 6:1) gave **5a** (0.141 g, 68%) as a colorless syrup:  $[\alpha]^{25}_D = -65.4$  (*c* 1.0, CHCl<sub>3</sub>); <sup>1</sup>H NMR (500 MHz, CDCl<sub>3</sub>) δ 5.43 (s, 1H, H-1), 5.24 (s, 1H, H-1'), 5.20 (d, *J*<sub>3',4'</sub> = 7.4 Hz, 1H, H-3'), 4.96 (ddd, *J*<sub>3',4'/4',5'</sub> = 6.9, 5.5, 1.0 Hz, 1H, H-4'), 4.89 (d, *J*<sub>4,5</sub> = 7.0 Hz, 1H, H-4), 4.37 (m, 2H, H-6a and H-6b), 4.23 (t, *J*<sub>4,5/5,6</sub> = 6.5 Hz, 1H, H-5), 4.20 (d, *J*<sub>5,6b/6a,6b</sub> = 7.6 Hz, 1H, H-6b), 3.68 (dd, *J*<sub>4',5'/5',6'</sub> = 7.8, 5.5 Hz, 1H, H-5'), 3.57 (dd, *J*<sub>5,6a/6a,6b</sub> = 7.5, 5.0 Hz, 1H, H-6a), 3.47 (s, 1H, OH), 1.54 (s, 3H, isopropylidene), 1.52 (s, 3H, isopropylidene), 1.42 (s, 3H, isopropylidene), 1.41 (s, 3H, isopropylidene); <sup>13</sup>C NMR (126 MHz, CDCl<sub>3</sub>) δ 200.8 (C-2), 113.1, 109.3, 99.5 and 98.4 (C-1/1'), 85.6, 77.2, 73.9, 73.4, 73.1, 71.0, 70.7, 65.2, 62.6, 28.0, 27.2, 25.8, 25.0; HRMS (ESI) *m/z* calcd for C<sub>18</sub>H<sub>24</sub>O<sub>10</sub>Na [M+Na]<sup>+</sup> 423.1262, found 423.1259.

**1,6-Anhydro-4-C-(1,6-anhydro-2,3-O-isopropylidene-β-D-lyxo-hexopyranos-4-uloose-3-yl)-2,3-O-isopropylidene-β-D-talopyranose (6a)**

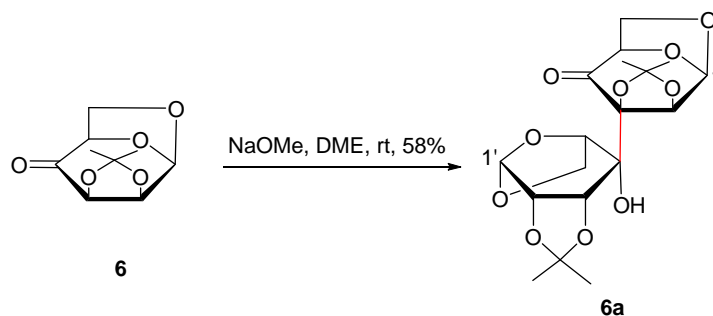

To a solution of **6** (0.077 g, 0.39 mmol) in dry DME (3.8 mL), was added NaOMe (2 mg) at rt. The mixture was stirred at the same temperature for 1h and TLC (petroleum ether/EtOAc, 1:1) showed the complete consumption of **6**. The reaction was quenched by addition of saturated aq. NH<sub>4</sub>Cl. The mixture was extracted with CH<sub>2</sub>Cl<sub>2</sub> three times. The combined organic layer was washed with brine, dried over anhydrous Na<sub>2</sub>SO<sub>4</sub>, and concentrated in vacuo to give a colourless oil. Purification by column chromatography (petroleum ether/EtOAc, 5:1) gave **6a** (0.045 g, 58%) as a white solid:  $[\alpha]^{25}_D = -13.3$  (*c* 1.0, CHCl<sub>3</sub>); <sup>1</sup>H NMR (500 MHz, CDCl<sub>3</sub>) δ 5.77 (d, *J* = 3.8 Hz, 1H, H-1), 5.22 (d, *J* = 3.1 Hz, 1H, H-1'), 4.82 (d, *J* = 3.8 Hz, 1H, H-2), 4.79 (d, *J* = 6.3 Hz, 1H, H-3'), 4.73 (d, *J* = 4.5 Hz, 1H, H-5), 4.62 (d, *J* = 6.2 Hz, 1H, H-5'), 4.28 (dd, *J* = 7.7, 0.9 Hz, 1H, H-6a'), 3.95 (dd, *J* = 6.3, 3.2 Hz, 1H, H-2'), 3.88 (d, *J* = 7.6 Hz, 1H, H-6a), 3.82–3.74

(m, 2H, H-6b and H-6b'), 3.44 (s, 1H, OH), 1.55 (s, 3H, isopropylidene), 1.52 (s, 3H, isopropylidene), 1.40 (s, 3H, isopropylidene), 1.38 (s, 3H, isopropylidene);  $^{13}\text{C}$  NMR (126 MHz,  $\text{CDCl}_3$ )  $\delta$  207.7 (C-4), 114.7, 110.6, 99.4 and 98.8 (C-1/1'), 88.9, 78.5, 76.9, 76.4, 74.8, 73.3, 73.0, 68.3, 63.7, 28.1, 28.0, 26.2, 25.9; HRMS (Dart Positive Ion Mode)  $m/z$  calcd for  $\text{C}_{18}\text{H}_{25}\text{O}_{10}$   $[\text{M}+\text{H}]^+$  401.1442, found 401.1442.

**2,3:5,6-Di-*O*-isopropylidene-2-*C*-(2,3;5,6-di-*O*-isopropylidene-1-*O*-trimethylsilyl- $\beta$ -*D*-mannofuranosyl)-*D*-mannono-1,4-lactone (7a)**

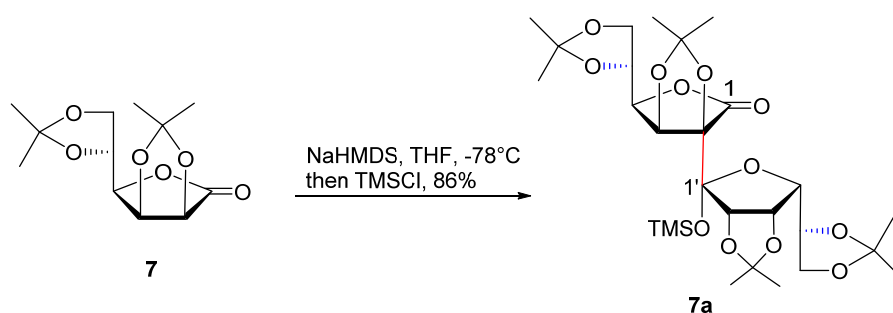

To a solution of **7** (0.108 g, 0.42 mmol) in dry THF (2.6 mL), was added NaHMDS (2.0 M in THF, 0.15 mL) at  $-78\text{ }^\circ\text{C}$ . The mixture was stirred at the same temperature for 30 mins and TLC (petroleum ether/EtOAc, 2:1) showed the complete consumption of **7**. Then TMSCl (0.037 mL, 0.29 mmol) was added and the reaction mixture was stirred at the same temperature for another 30 mins. The reaction was quenched by addition of saturated aq.  $\text{NH}_4\text{Cl}$ . After warming to RT, the mixture was extracted with  $\text{CH}_2\text{Cl}_2$  three times. The combined organic layer was washed with brine, dried over anhydrous  $\text{Na}_2\text{SO}_4$ , and concentrated in vacuo to give a pale yellow oil. Purification by column chromatography (petroleum ether/EtOAc, 4:1) gave **7a** (0.106 g, 86%) as a white solid:  $^{12}\text{C}$   $[\alpha]^{25}_{\text{D}} = 14.7$  ( $c$  1.0,  $\text{CHCl}_3$ );  $^1\text{H}$  NMR (500 MHz,  $\text{CDCl}_3$ )  $\delta$  4.78 (d,  $J = 3.3$  Hz, 1H), 4.76 (dd,  $J = 6.0, 4.8$  Hz, 1H), 4.68 (d,  $J = 6.1$  Hz, 1H), 4.35 (s, 1H), 4.32–4.28 (m, 1H), 4.26 (dd,  $J = 8.9, 3.3$  Hz, 1H), 4.15–4.01 (m, 5H), 1.58 (s, 3H, isopropylidene), 1.46 (s, 3H, isopropylidene), 1.44 (s, 3H, isopropylidene), 1.42 (s, 3H, isopropylidene), 1.41 (s, 3H, isopropylidene), 1.37 (s, 9H, isopropylidene), 0.15 (s, 9H, TMS);  $^{13}\text{C}$  NMR (126 MHz,  $\text{CDCl}_3$ )  $\delta$  172.2 (C-1), 115.0, 112.8, 109.9, 109.6, 105.8 (C-1'), 89.2, 81.0, 80.1, 79.8, 79.5, 78.8, 72.9, 72.6, 67.4, 66.8, 27.3, 27.1, 26.9, 26.7, 25.3, 25.3, 25.2, 23.4, 2.0; HRMS (ESI)  $m/z$  calcd for  $\text{C}_{27}\text{H}_{44}\text{O}_{12}\text{SiNa}$   $[\text{M}+\text{Na}]^+$  611.2494, found 611.2495.

**2,3:5,6-Di-*O*-isopropylidene-2-*C*-(2,3;5,6-di-*O*-isopropylidene-1-*O*-trimethylsilyl- $\alpha$ -*L*-gulofuranosyl)-*L*-gulono-1,4-lactone (8a)**

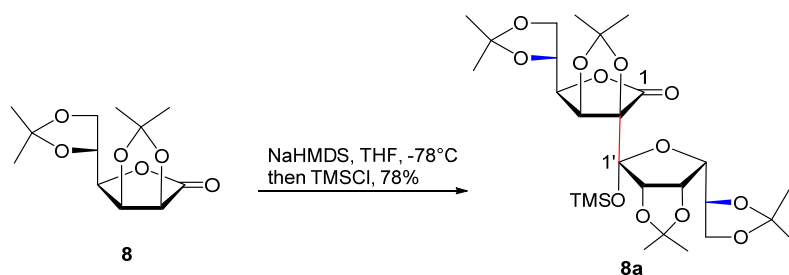

To a solution of **8** (1.247 g, 4.83 mmol) in dry THF (30.2 mL), was added NaHMDS (2.0 M in THF, 1.70 mL) at  $-78\text{ }^{\circ}\text{C}$ . The mixture was stirred at the same temperature for 30 mins and TLC (petroleum ether/EtOAc, 2:1) showed the complete consumption of **8**. Then TMSCl (0.43 mL, 3.37 mmol) was added and the reaction mixture was stirred at the same temperature for another 30 mins. The reaction was quenched by addition of saturated aq.  $\text{NH}_4\text{Cl}$ . After warming to RT, the mixture was extracted with  $\text{CH}_2\text{Cl}_2$  three times. The combined organic layer was washed with brine, dried over anhydrous  $\text{Na}_2\text{SO}_4$ , and concentrated in vacuo to give a pale yellow oil. Purification by column chromatography (petroleum ether/EtOAc, 8:1) gave **8a** (1.104 g, 78%) as a white solid:  $[\alpha]_D^{25} = 19.4$  ( $c$  1.2,  $\text{CHCl}_3$ );  $^1\text{H NMR}$  (500 MHz,  $\text{CDCl}_3$ )  $\delta$  4.91 (d,  $J_{2',3'} = 6.4$  Hz, 1H, H-2'), 4.74 (d,  $J_{3,4} = 3.5$  Hz, 1H, H-3), 4.70–4.65 (m, 1H, H-3'), 4.47–4.37 (m, 2H, H-4 and H-5), 4.27 (dt,  $J_{4',5'}/5',6'} = 8.3, 6.4$  Hz, 1H, H-5'), 4.18 (dd,  $J_{5,6a/6a,6b} = 8.7, 6.4$  Hz, 1H, H-6a), 4.08 (dd,  $J_{5',6a'}/6a',6b'} = 8.7, 6.6$  Hz, 1H, H-6a'), 3.89 (dd,  $J_{3',4'}/4',5'} = 8.4, 5.4$  Hz, 1H, H-4'), 3.80 (dd,  $J_{5,6b/6a,6b} = 8.7, 6.1$  Hz, 1H, H-6b), 3.62 (dd,  $J_{5',6b'}/6a',6b'} = 8.7, 6.3$  Hz, 1H, H-6b'), 1.54 (s, 3H, isopropylidene), 1.45 (s, 3H, isopropylidene), 1.42 (s, 3H, isopropylidene), 1.41 (s, 3H, isopropylidene), 1.38 (s, 3H, isopropylidene), 1.34 (s, 3H, isopropylidene), 1.32 (s, 3H, isopropylidene), 0.25 (s, 9H, TMS);  $^{13}\text{C NMR}$  (126 MHz,  $\text{CDCl}_3$ )  $\delta$  173.6 (C-1), 115.2, 112.9, 110.4, 109.5, 106.2 (C-1'), 88.9, 81.7, 81.6, 80.8, 80.4, 78.8, 76.4, 75.1, 66.0, 65.1, 27.3, 26.9, 26.7, 26.6, 25.4, 25.3, 25.2, 23.5; HRMS (ESI)  $m/z$  calcd for  $\text{C}_{27}\text{H}_{44}\text{O}_{12}\text{SiNa}$   $[\text{M}+\text{Na}]^+$  611.2494, found 611.2496.

**2,3-O-Isopropylidene-2-C-(2,3-O-isopropylidene-5-O-triisopropylsilyl-1-O-trimethylsilyl- $\beta$ -D-lyxofuranosyl)-5-O-triisopropylsilyl-D-lyxono-1,4-lactone (9a)**

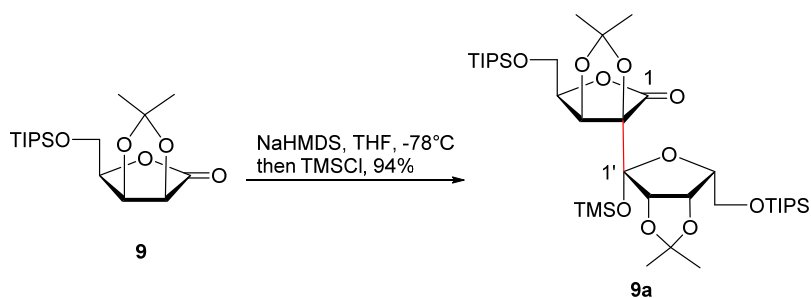

To a solution of **9** (0.564 g, 1.64 mmol) in dry THF (10.2 mL), was added NaHMDS (2.0 M in THF, 0.57 mL) at -78 °C. The mixture was stirred at the same temperature for 30 mins and TLC (petroleum ether/EtOAc, 9:1) showed the complete consumption of **9**. Then TMSCl (0.15 mL, 1.17 mmol) was added and the reaction mixture was stirred at the same temperature for another 30 mins. The reaction was quenched by addition of saturated aq. NH<sub>4</sub>Cl. After warming to RT, the mixture was extracted with CH<sub>2</sub>Cl<sub>2</sub> three times. The combined organic layer was washed with brine, dried over anhydrous Na<sub>2</sub>SO<sub>4</sub>, and concentrated in vacuo to give a pale yellow oil. Purification by column chromatography (petroleum ether/EtOAc, 40:1) gave **9a** (0.588 g, 94%) as a white solid:  $[\alpha]_D^{25} = 4.6$  (*c* 1.0, CHCl<sub>3</sub>); <sup>1</sup>H NMR (500 MHz, CDCl<sub>3</sub>) δ 4.87 (d, *J*<sub>2',3'</sub> = 6.4 Hz, 1H, H-2'), 4.81 (d, *J*<sub>3,4</sub> = 3.3 Hz, 1H, H-3), 4.74–4.69 (m, 1H, H-3'), 4.54 (td, *J*<sub>3,4/4,5</sub> = 6.6, 3.4 Hz, 1H, H-4), 4.10 (q, *J*<sub>3',4'/4',5'</sub> = 5.5 Hz, 1H, H-4'), 3.99 (qd, *J*<sub>4,5/5a,5b</sub> = 10.2, 6.6 Hz, 2H, H-5a and H-5b), 3.91 (dd, *J*<sub>4',5b'/5a',5b'</sub> = 10.2, 5.5 Hz, 1H, H-5b'), 3.83 (dd, *J*<sub>4',5a'/5a',5b'</sub> = 10.2, 6.5 Hz, 1H, H-5a'), 1.54 (s, 3H, isopropylidene), 1.41 (s, 3H, isopropylidene), 1.41 (s, 3H, isopropylidene), 1.34 (s, 3H, isopropylidene), 1.14–1.00 (m, 42H, TIPS), 0.21 (s, 9H, TMS); <sup>13</sup>C NMR (126 MHz, CDCl<sub>3</sub>) δ 174.1 (C-1), 114.1, 112.3, 105.6 (C-1'), 88.8, 80.9, 80.5, 80.1, 80.0, 78.8, 62.0, 60.9, 27.2, 26.5, 25.2, 23.5, 17.9, 17.8, 11.9, 11.9, 2.1; HRMS (ESI) *m/z* calcd for C<sub>37</sub>H<sub>72</sub>O<sub>10</sub>Si<sub>3</sub>Na [M+Na]<sup>+</sup> 783.4325, found 783.4325.

**2,3:5,6-Di-*O*-isopropylidene-2-*C*-(2,3:5,6-di-*O*-isopropylidene-1-*O*-trimethylsilyl-β-*D*-gulofuranosyl)-*D*-gulono-1,4-lactone (**10a**)**

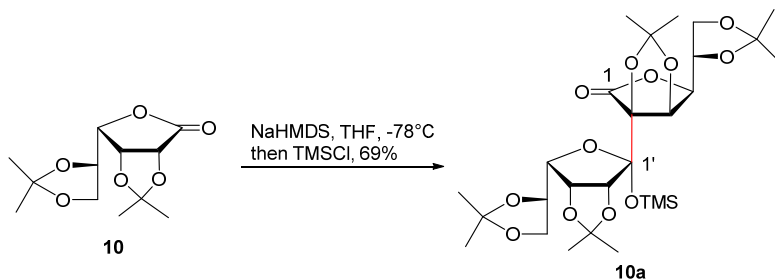



To a solution of **10** (0.128 g, 0.50 mmol) in dry THF (3.1 mL), was added NaHMDS (2.0 M in THF, 0.17 mL) at -78 °C. The mixture was stirred at the same temperature for 30 mins and TLC (petroleum ether/EtOAc, 2:1) showed the complete consumption of **10**. Then TMSCl (0.044 mL, 0.34 mmol) was added and the reaction mixture was stirred at the same temperature for another 30 mins. The reaction was quenched by addition of saturated aq. NH<sub>4</sub>Cl. After warming to RT, the mixture was extracted with CH<sub>2</sub>Cl<sub>2</sub> three times. The combined organic layer was washed with brine, dried over anhydrous Na<sub>2</sub>SO<sub>4</sub>, and concentrated in vacuo to give a pale yellow oil. Purification by column chromatography (petroleum ether/EtOAc, 8:1) gave **10a** (0.100 g, 69%) as a white solid:  $[\alpha]_D^{25} = -21.0$  (*c* 1.0, CHCl<sub>3</sub>); <sup>1</sup>H NMR (500 MHz, CDCl<sub>3</sub>) δ 4.88 (d,  $J_{2',3'} = 6.3$  Hz, 1H, H-2'), 4.73 (d,  $J_{3,4} = 3.0$  Hz, 1H, H-3), 4.66 (t,  $J_{2',3',3',4'} = 5.8$  Hz, 1H, H-3'), 4.41 (m, 2H, H-4 and H-5), 4.25 (q,  $J_{4',5',5a',5b'} = 6.6$  Hz, 1H, H-5'), 4.20–4.14 (m, 1H, H-6a), 4.10–4.04 (m, 1H, H-6a'), 3.90–3.85 (m, 1H, H-4'), 3.82–3.77 (m, 1H, H-6b), 3.63–3.57 (m, 1H, H-6b'), 1.53 (s, 3H, isopropylidene), 1.43 (s, 3H, isopropylidene), 1.42–1.38 (m, 9H, isopropylidene), 1.37 (s, 3H, isopropylidene), 1.32 (s, 3H, isopropylidene), 1.31 (s, 3H, isopropylidene), 0.23 (s, 9H, TMS); <sup>13</sup>C NMR (126 MHz, CDCl<sub>3</sub>) δ 173.6 (C-1), 115.2, 112.8, 110.4, 109.5, 106.2 (C-1'), 88.8, 81.7, 81.6, 80.8, 80.4, 78.8, 76.4, 75.1, 66.0, 65.1, 27.3, 26.9, 26.7, 26.6, 25.4, 25.3, 25.2, 23.5, 2.3; HRMS (ESI) *m/z* calcd for C<sub>27</sub>H<sub>44</sub>O<sub>12</sub>SiNa [M+Na]<sup>+</sup> 611.2494, found 611.2501.

**2,3-O-Isopropylidene-2-C-(2,3-O-isopropylidene-1-O-trimethylsilyl- $\alpha$ -D-erythro-1,4-lactone (11a)**

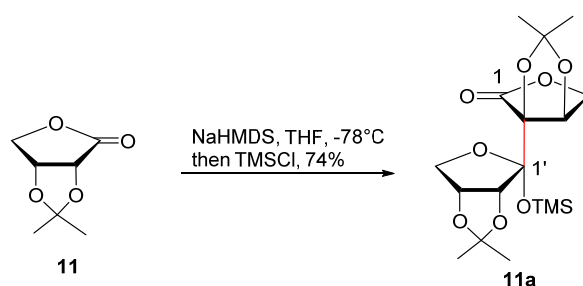

To a solution of **11** (0.148 g, 0.99 mmol) in dry THF (6.2 mL), was added NaHMDS (2.0 M in THF, 0.34 mL) at -78 °C. The mixture was stirred at the same temperature for 30 mins and TLC (petroleum ether/EtOAc, 2:1) showed the complete consumption of **11**. Then TMSCl (0.009 mL, 0.07 mmol) was added and the reaction mixture was stirred at the same temperature for another 30 mins. The reaction was quenched by addition of saturated aq. NH<sub>4</sub>Cl. After warming to RT, the mixture was extracted with CH<sub>2</sub>Cl<sub>2</sub> three

times. The combined organic layer was washed with brine, dried over anhydrous Na<sub>2</sub>SO<sub>4</sub>, and concentrated in vacuo to give a pale yellow oil. Purification by column chromatography (petroleum ether/EtOAc, 12:1) gave **11a** (0.134 g, 74%) as a white solid.<sup>S12</sup> [ $\alpha$ ]<sub>D</sub><sup>25</sup> = -33.6 (*c* 1.0, CHCl<sub>3</sub>); <sup>1</sup>H NMR (500 MHz, CDCl<sub>3</sub>)  $\delta$  4.87–4.76 (m, 3H, H-3, H-2' and H-3'), 4.32 (d, *J* = 10.5 Hz, 2H), 4.03–3.90 (m, 2H), 1.57 (s, 3H, isopropylidene), 1.42 (s, 3H, isopropylidene), 1.42 (s, 3H, isopropylidene), 1.35 (s, 3H, isopropylidene), 0.19 (s, 9H, TMS); <sup>13</sup>C NMR (126 MHz, CDCl<sub>3</sub>)  $\delta$  174.2 (C-1), 114.2, 113.1, 107.0 (C-1'), 87.6, 80.8, 80.3, 78.6, 72.5, 70.6, 27.2, 26.5, 25.8, 23.9, 1.9; HRMS (ESI) *m/z* calcd for C<sub>17</sub>H<sub>28</sub>O<sub>8</sub>SiNa [M+Na]<sup>+</sup> 411.1446, found 411.1450.

### 3. References

- [S1] M. T. de Oliveira, D. L. Hughes, S. A. Nepogodiev and R. A. Field, *Carbohydr. Res.*, 2008, **343**, 211-220.
- [S2] (a) J. Moravcová, J. Čapková and J. Staněk, *Carbohydr. Res.*, 1994, **263**, 61-66; (b) S. D. Lucas, A. P. Rauter, J. Schneider and H. P. Wessel, *J. Carbohydr. Chem.*, 2009, **28**, 431-446.
- [S3] (a) R. D. Marwood, D. J. Jenkins, V. Correa, C. W. Taylor and B. V. L. Potter, *J. Med. Chem.*, 2000, **43**, 4278-4287; (b) M. Giordano and A. Iadonisi, *Tetrahedron Lett.*, 2013, **54**, 1550-1552.
- [S4] T. Bauer, M. Majdecki and J. Jurczak, *Tetrahedron*, 2013, **69**, 1930-1939.
- [S5] (a) D. Horton and J. S. Jewell, *Carbohydr. Res.*, 1967, **5**, 149-160; (b) M. Kloosterman, D. de Wit, J. H. van Boom and H. T. de Hey, *Recueil des Travaux Chimiques des Pays-Bas*, 1986, **105**, 229-231; (c) T. Tanaka, W. C. Huang, M. Noguchi, A. Kobayashi and S.-i. Shoda, *Tetrahedron Lett.*, 2009, **50**, 2154-2157.
- [S6] (a) M. Kloosterman, M. P. De Nijs and J. H. Van Boom, *J. Carbohydr. Chem.* 1986, **5**, 215-233; (b) N. Boissière-Junot, C. Tellier and C. Rabiller, *J. Carbohydr. Chem.*, 1998, **17**, 99-115; (c) M. Georges and B. Fraser-Reid, *Carbohydr. Res.* 1984, **127**, 162-164; (d) M. A. Zottola, R. Alonso, G. D. Vite and B. Fraser-Reid, *J. Org. Chem.*, 1989, **54**, 6123-6125; (e) T. Susana, N. Beatriz, B. Vicen and A. Ricardo, *J. Org. Chem.*, 2003, **68**, 4772-4783.
- [S7] (a) R. Csuk and P. Dörr, *J. Carbohydr. Chem.*, 1995, **14**, 35-44; (b) A. Oddo and R. Holl, *Carbohydr. Res.*, 2012, **359**, 59-64.
- [S8] S. Thopate and G. Dhage, *Synlett*, 2017, **28**, 970-972.

- [S9] (a) Y.-F. Tsai, C.-C. Huang, S.-H. Lin, P.-M. Su, Y.-J. Chen and T.-Y. Wu, *Heterocycles*, 2012, **85**, 299; (b) Y. F. Wu, Y. F. Tsai, J. R. Guo, C. P. Yu, H. M. Yu and C. C. Liao, *Org. Biomol. Chem.*, 2014, **12**, 9345-9349.
- [S10] (a) C. Bello, M. Cea, G. D. Bello, A. Garuti, I. Rocco, G. Cirmena, E. Moran, A. Nahimana, M. A. Duchosal, F. Fruscione, P. Pronzato, F. Grossi, F. Patrone, A. Ballestrero, M. Dupuis, B. Sordat, A. Nencioni and P. Vogel, *Bioorg. Med. Chem.*, 2010, **18**, 3320-3334; (b) J. Hoberg, J. Singleton and K. Sahteli, *Synthesis*, 2008, **22**, 3682-3686.
- [S11] S. Wang, J. Sun, Q. Zhang, X. Cao, Y. Zhao, G. Tang and B. Yu, *Angew. Chem. Int. Ed. Engl.*, 2018, **57**, 2884-2888.
- [S12] R. Csuk, M. Schaade and A. Schmidt, *Tetrahedron*, 1994, **50**, 11885-11892.

d-chloroform

7.72  
7.72  
7.71  
7.70  
7.69  
7.67  
7.67  
7.42  
7.40  
7.39  
7.38  
7.38  
7.36

6.03  
6.02

4.39  
4.37  
4.29  
4.28  
4.28  
4.27  
3.97  
3.96  
3.95  
3.94  
3.92  
3.91  
3.89

1.37  
1.35  
1.06

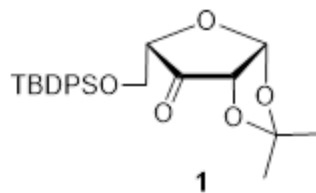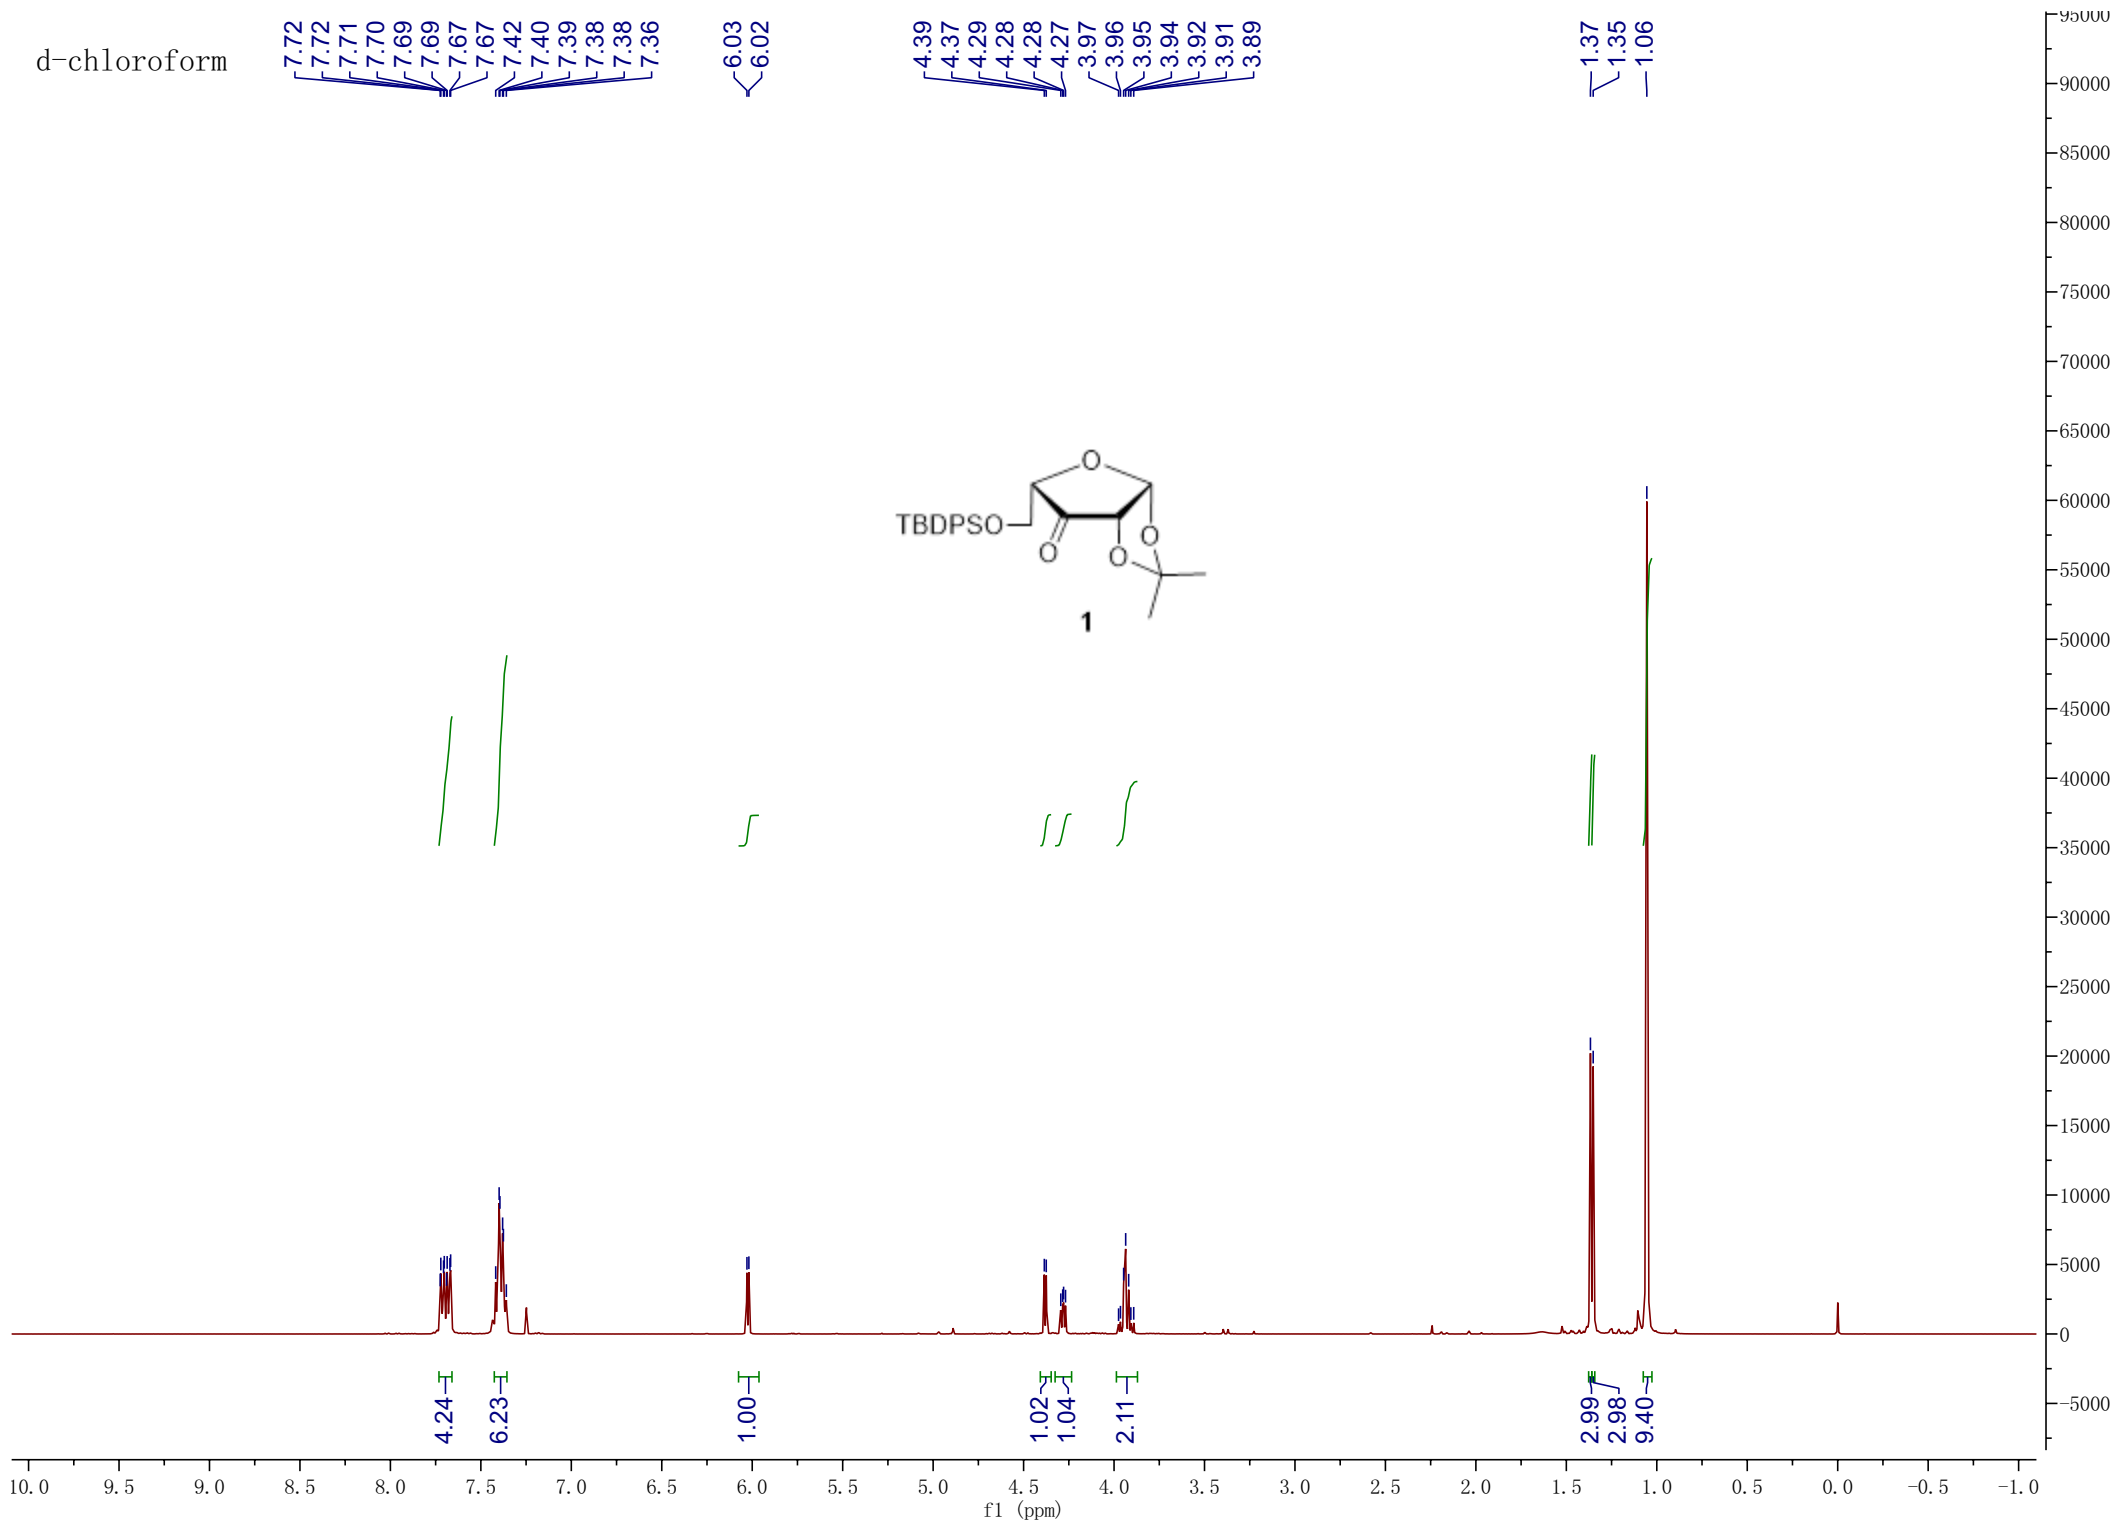

S20

d-chloroform

7.96  
7.96  
7.95  
7.95  
7.60  
7.58  
7.57  
7.46  
7.45  
7.43

6.15  
6.14

4.72  
4.72  
4.70  
4.69  
4.49  
4.49  
4.48  
4.46  
4.46  
4.45  
4.44  
4.44

1.52  
1.44

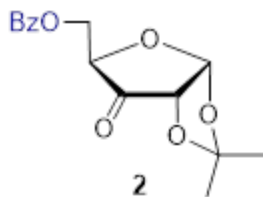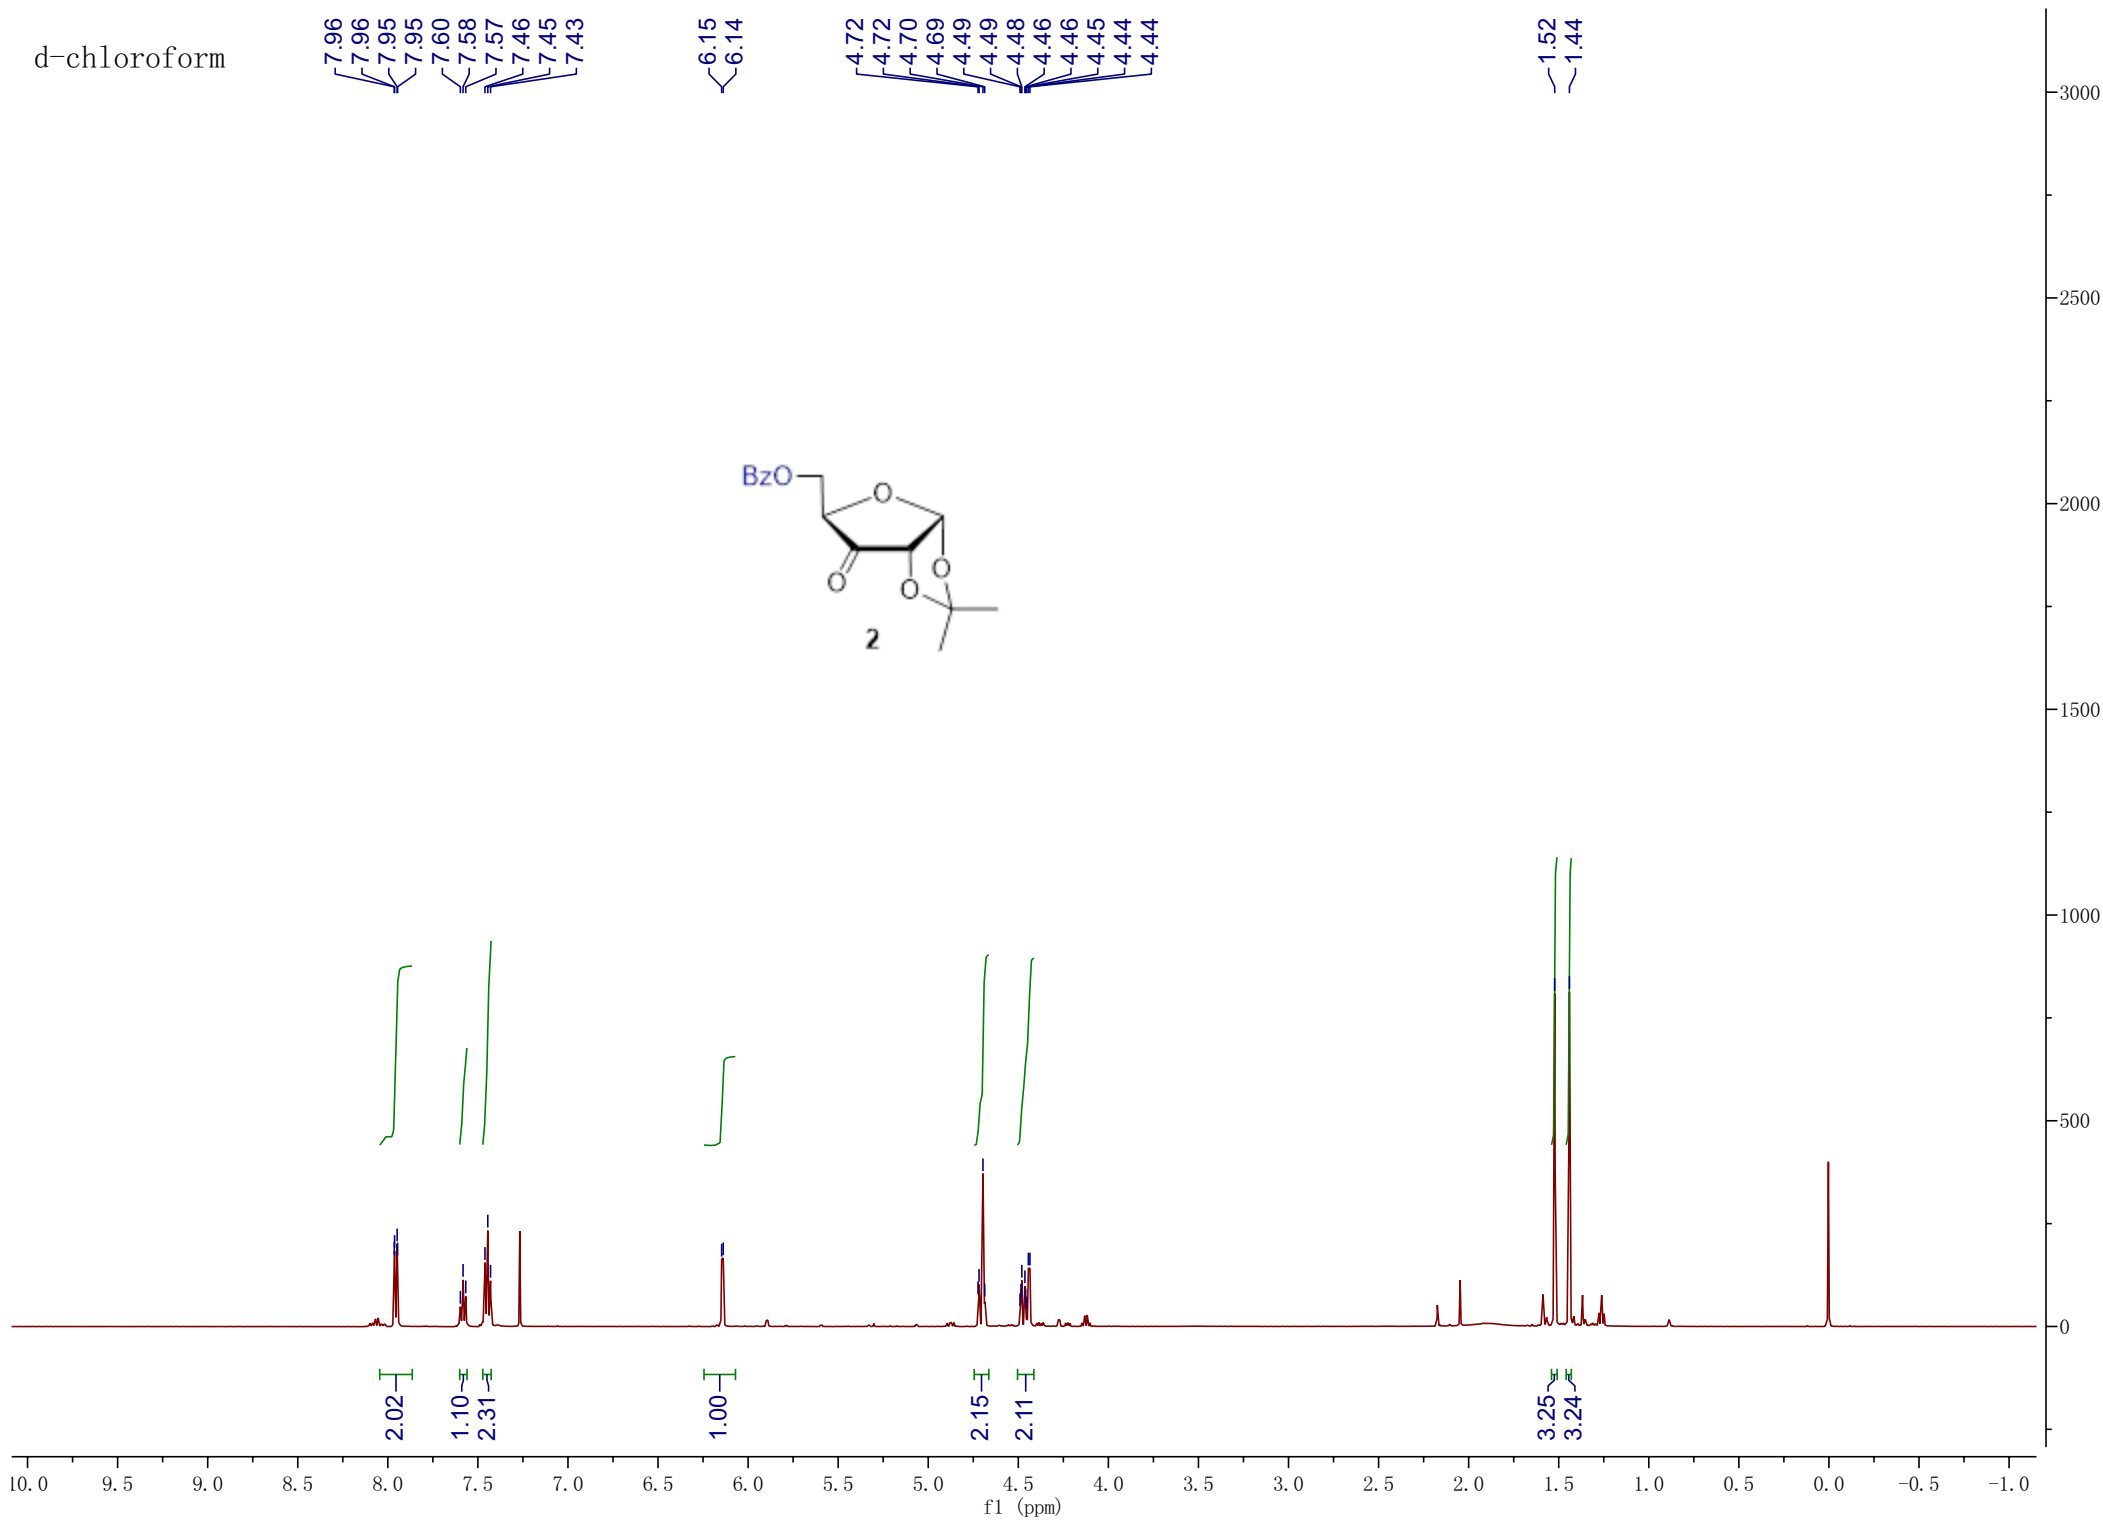

d-chloroform

7.36  
7.34  
7.32  
7.30  
7.29  
7.27  
7.25

6.14  
6.13

4.55  
4.52  
4.50  
4.47  
4.45  
4.35  
4.34  
3.73  
3.73

1.46  
1.43

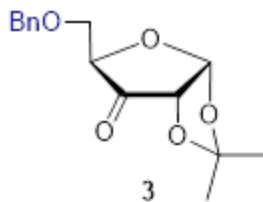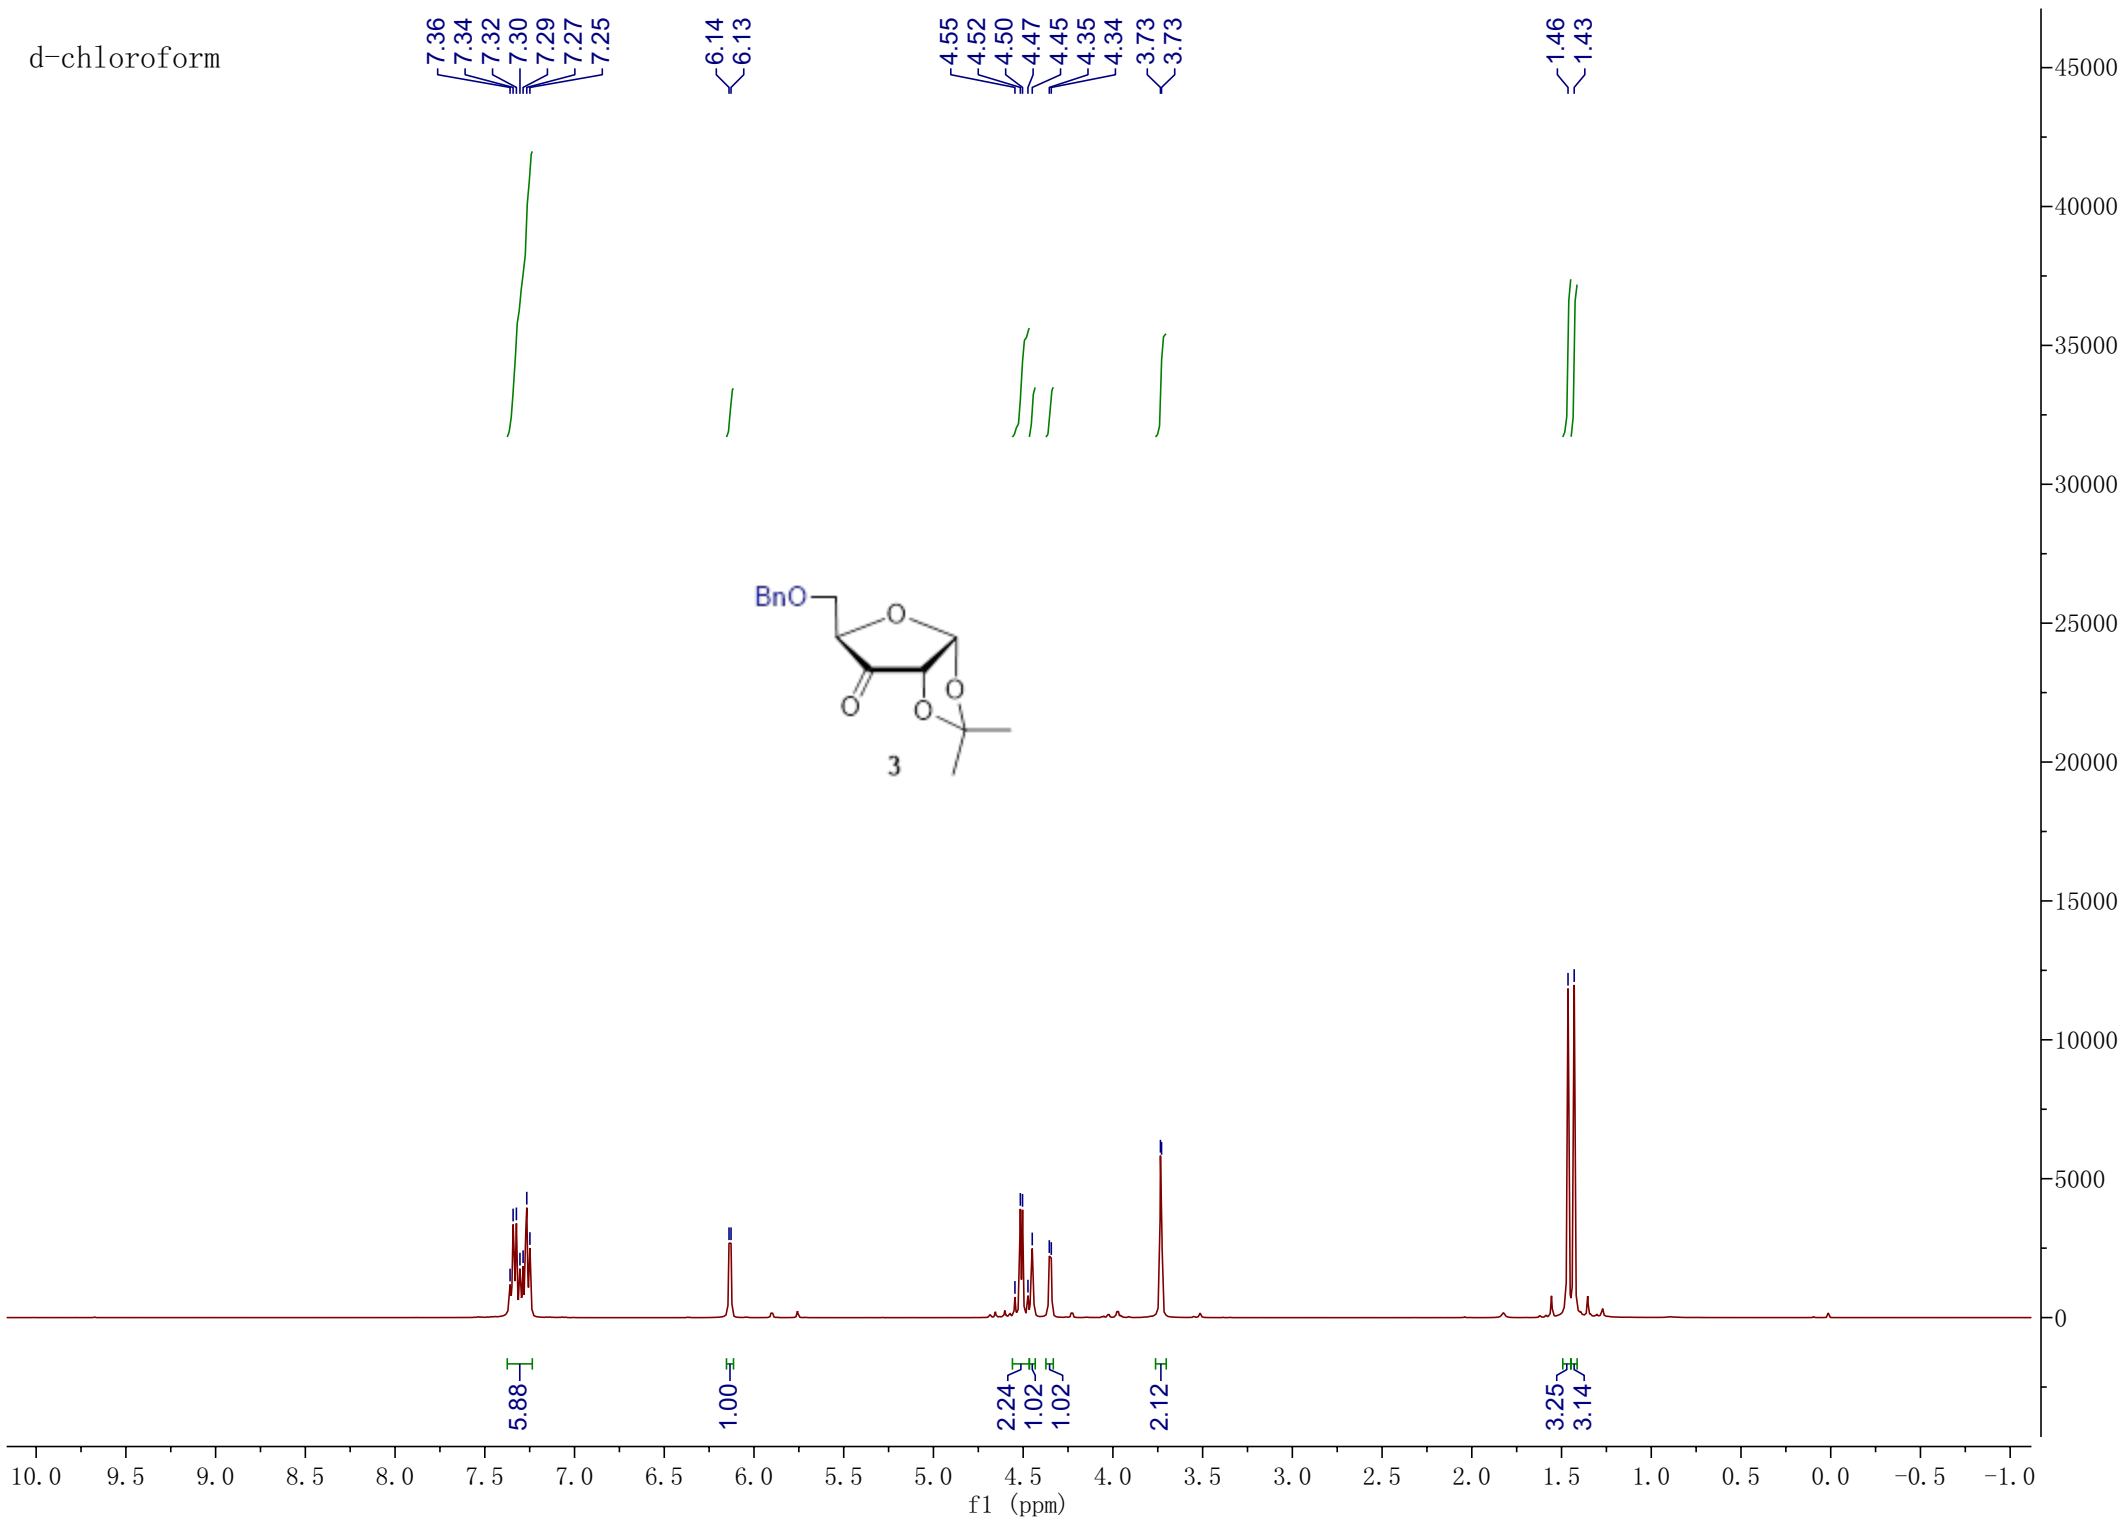

S22

d-chloroform

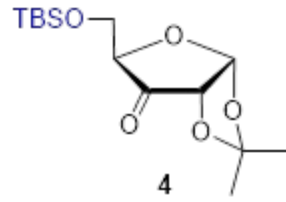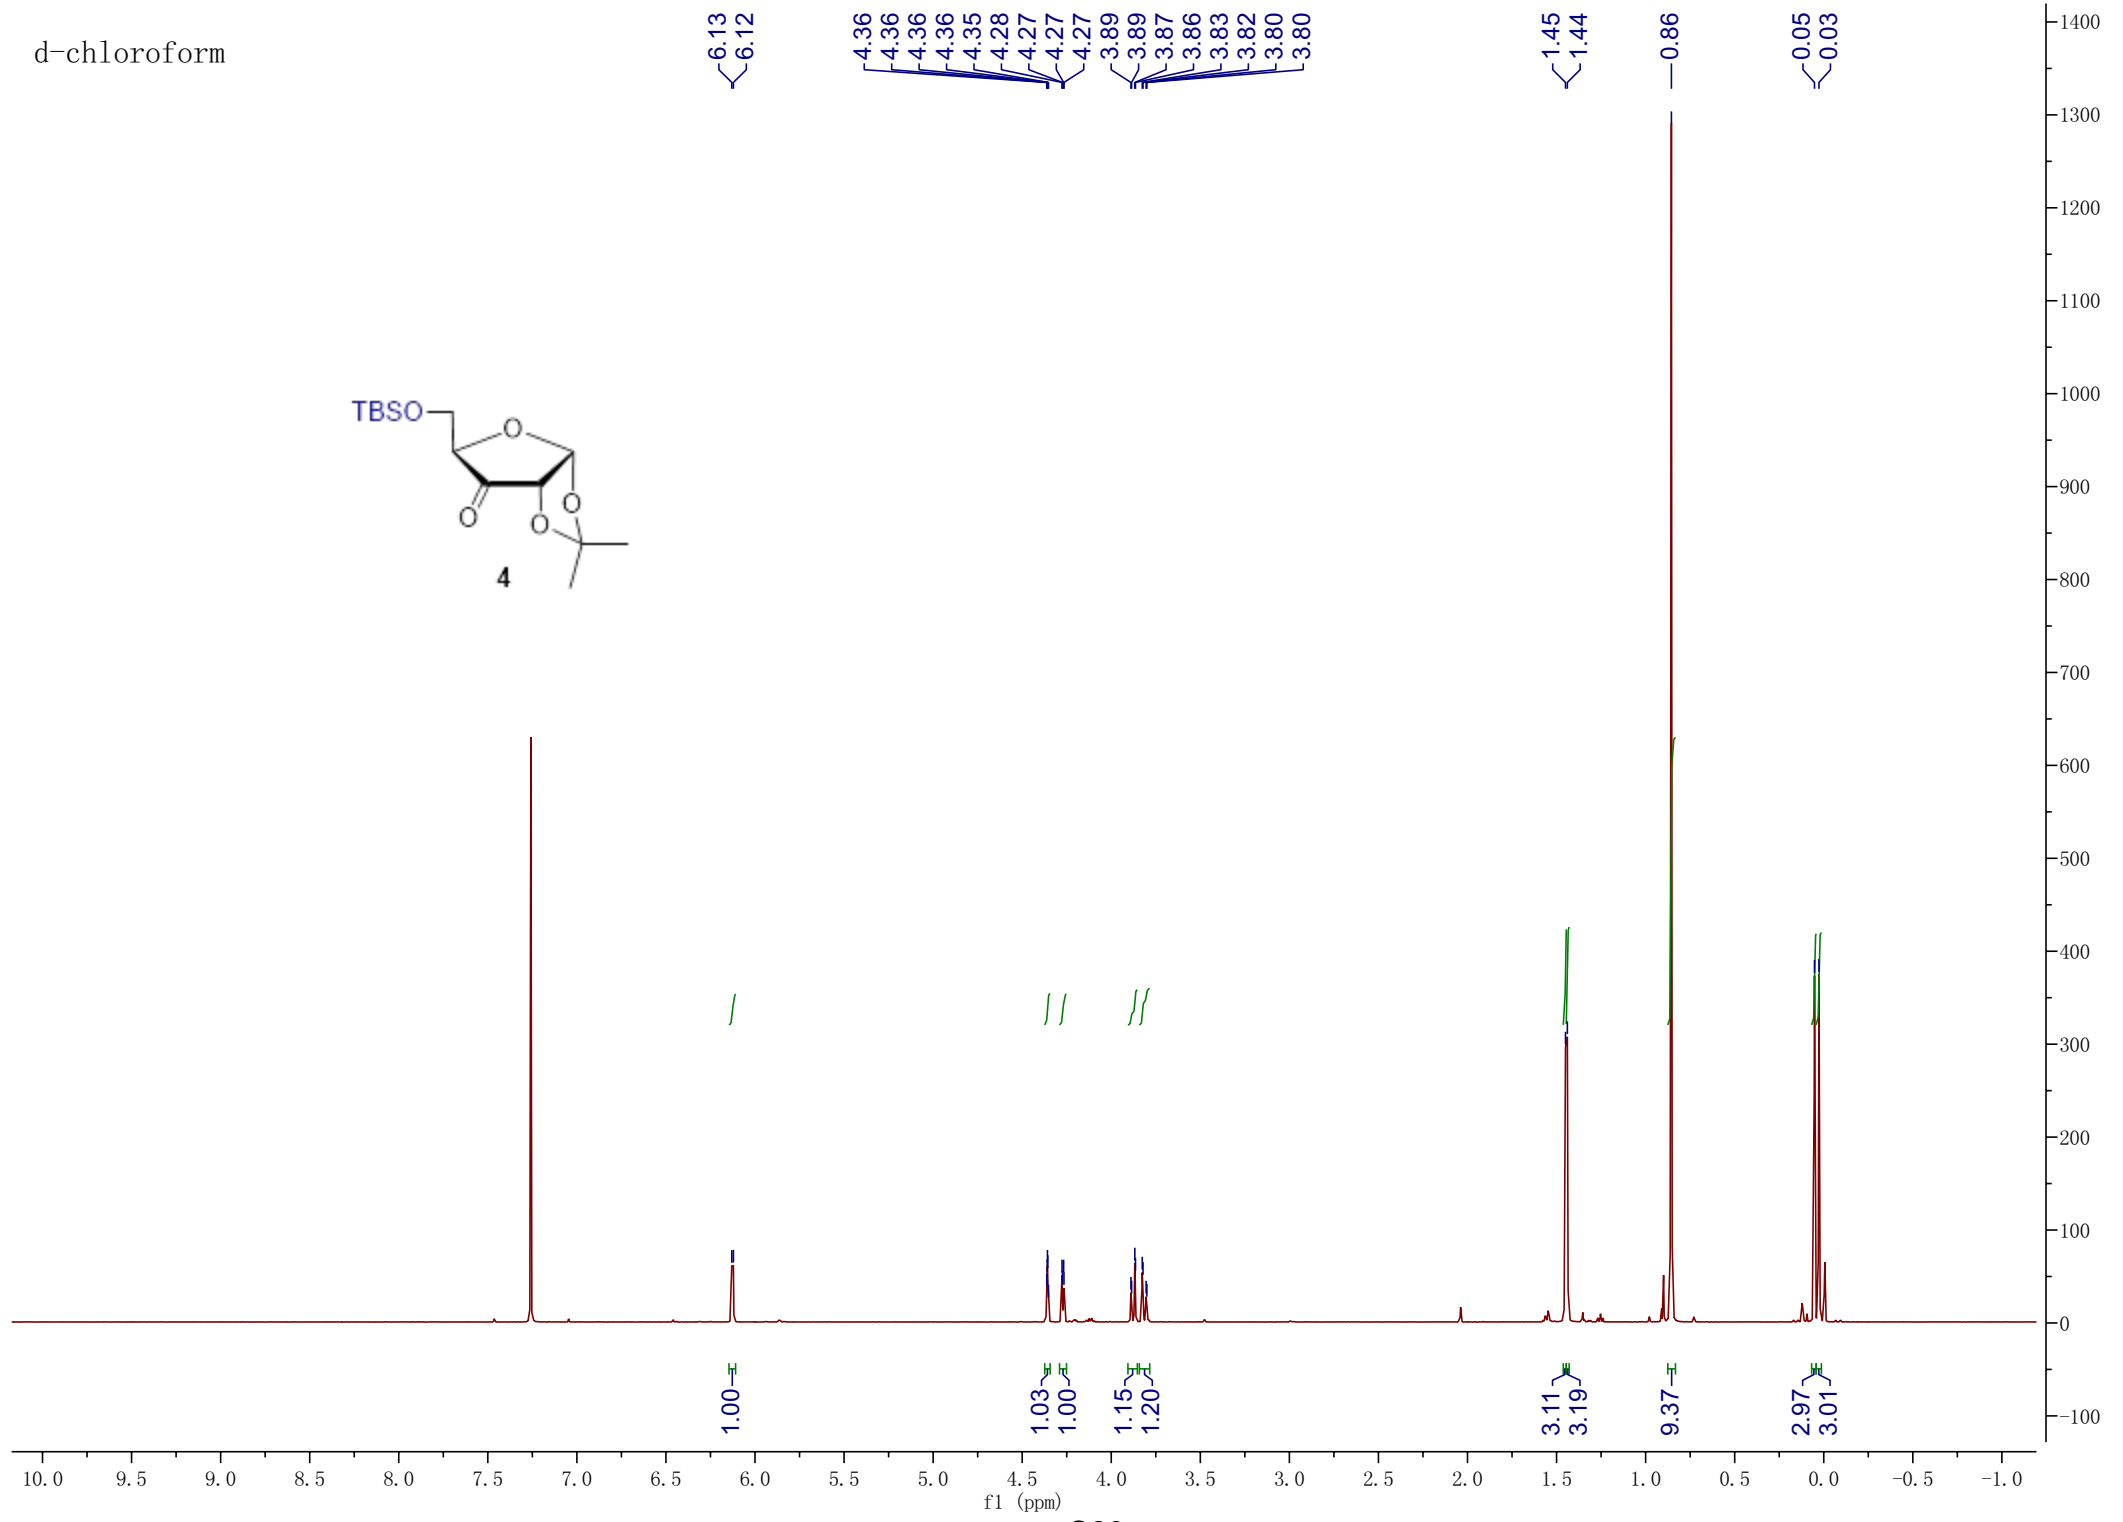

S23

d-chloroform

5.17  
4.79  
4.78  
4.77  
4.75  
4.74  
4.44  
4.42  
4.24  
4.23  
3.76  
3.75  
3.73

1.51  
1.36

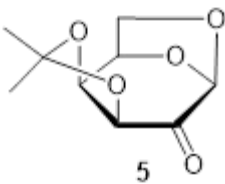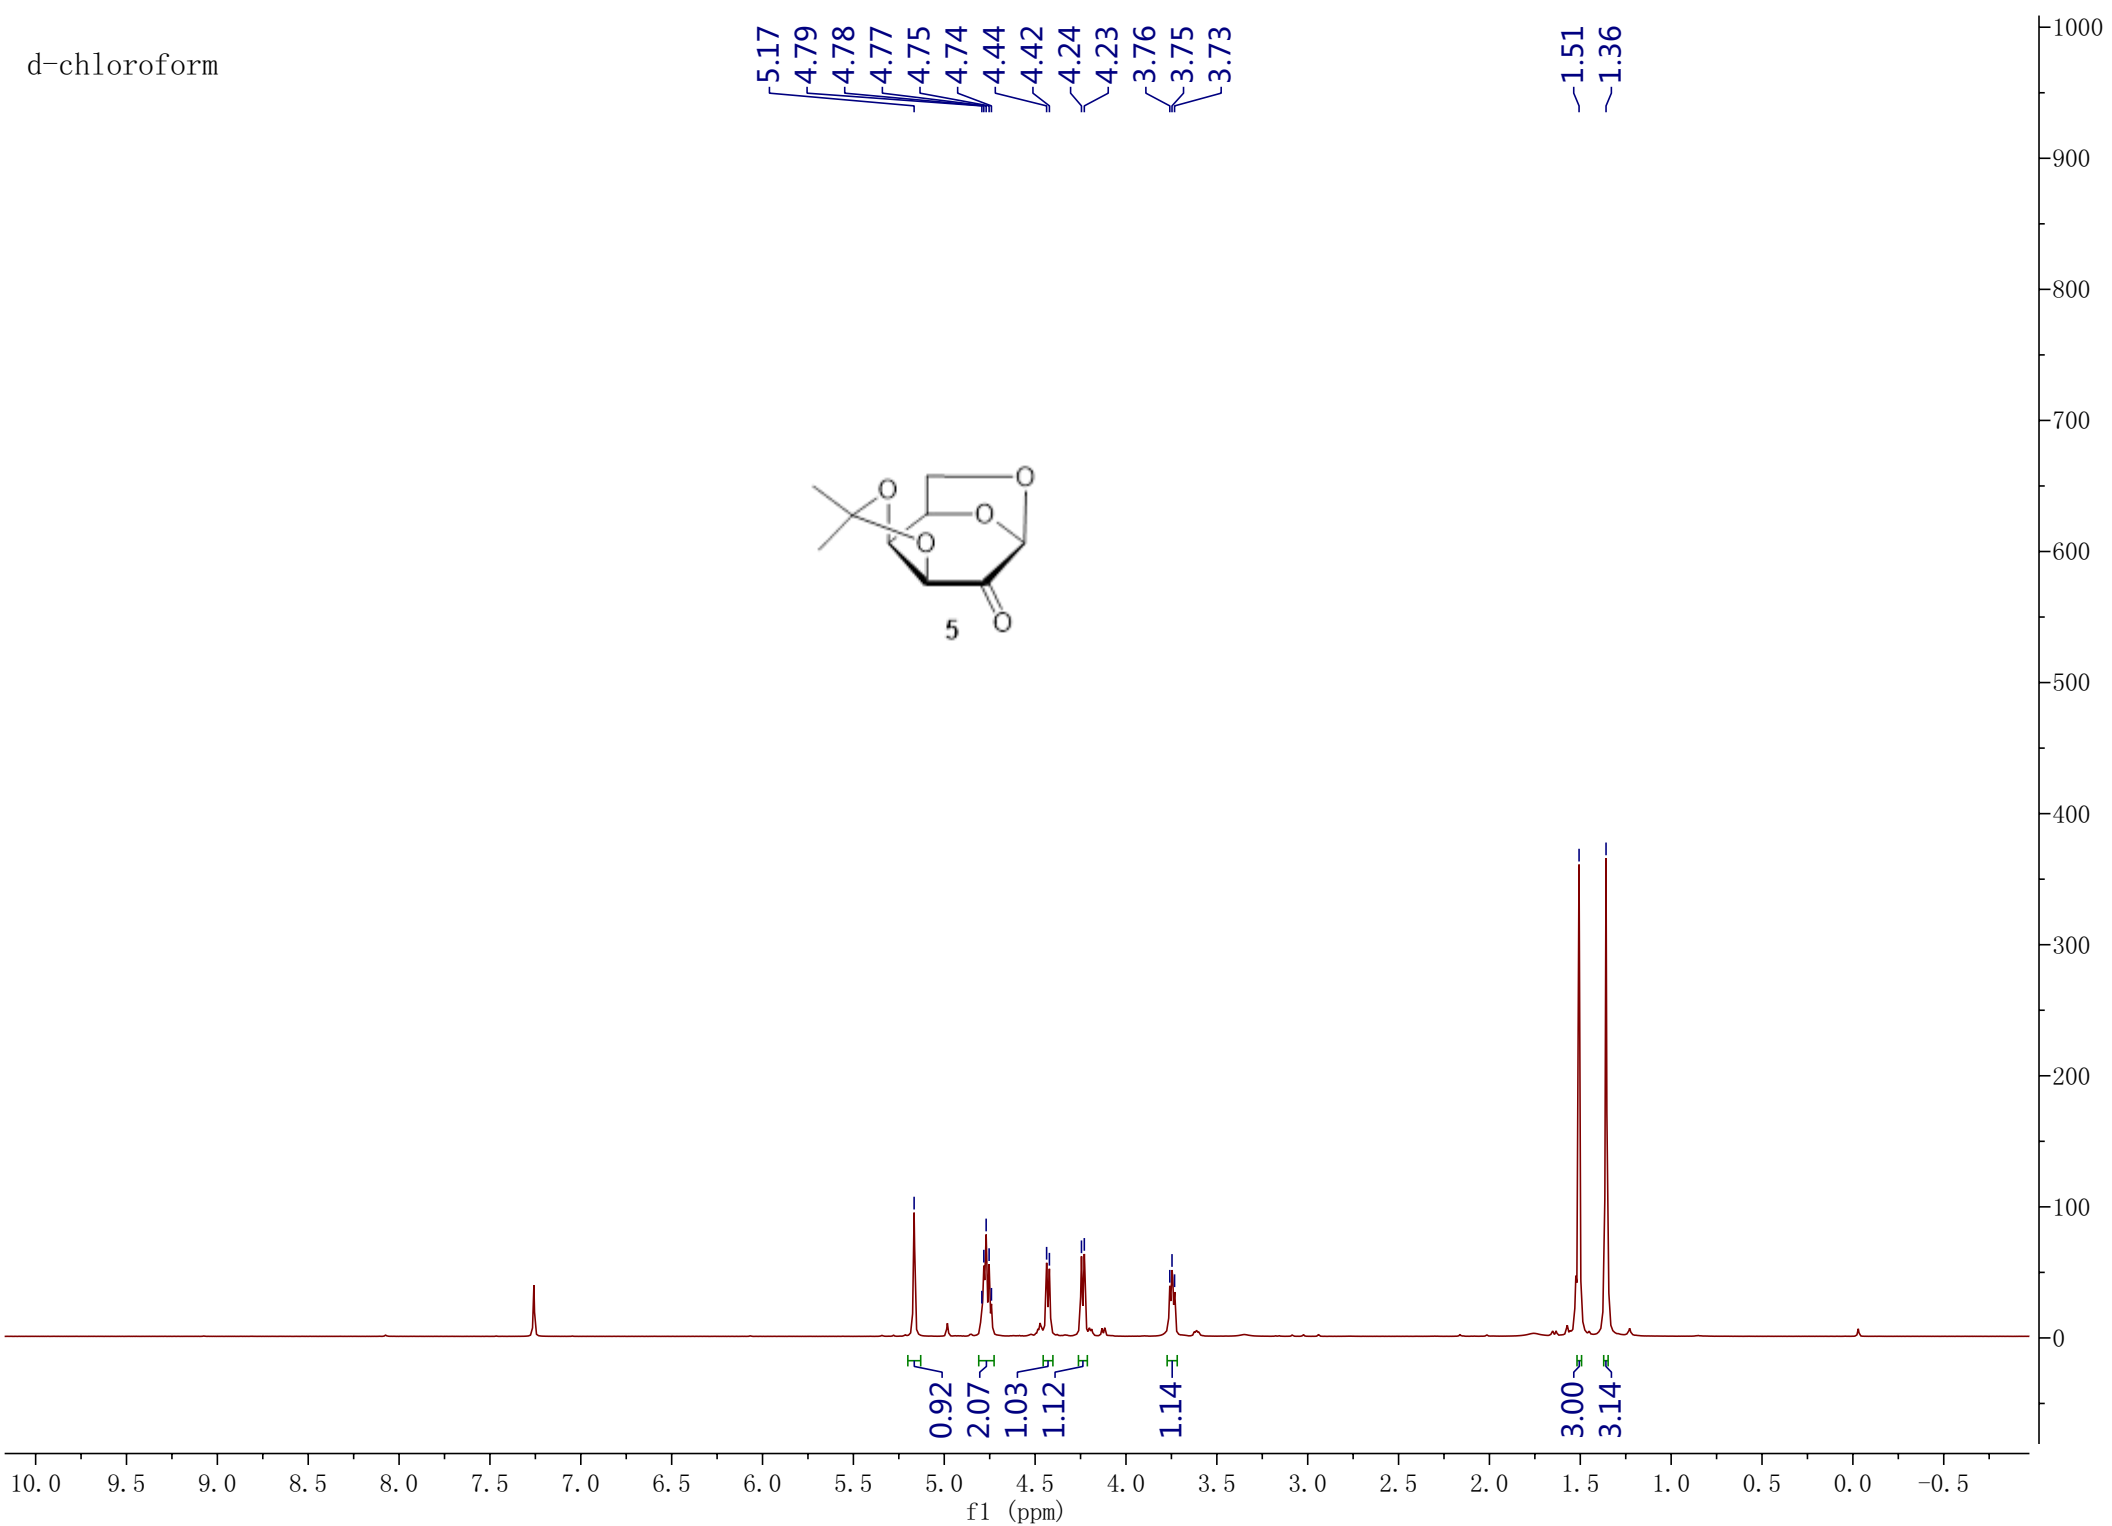

S24



d-chloroform

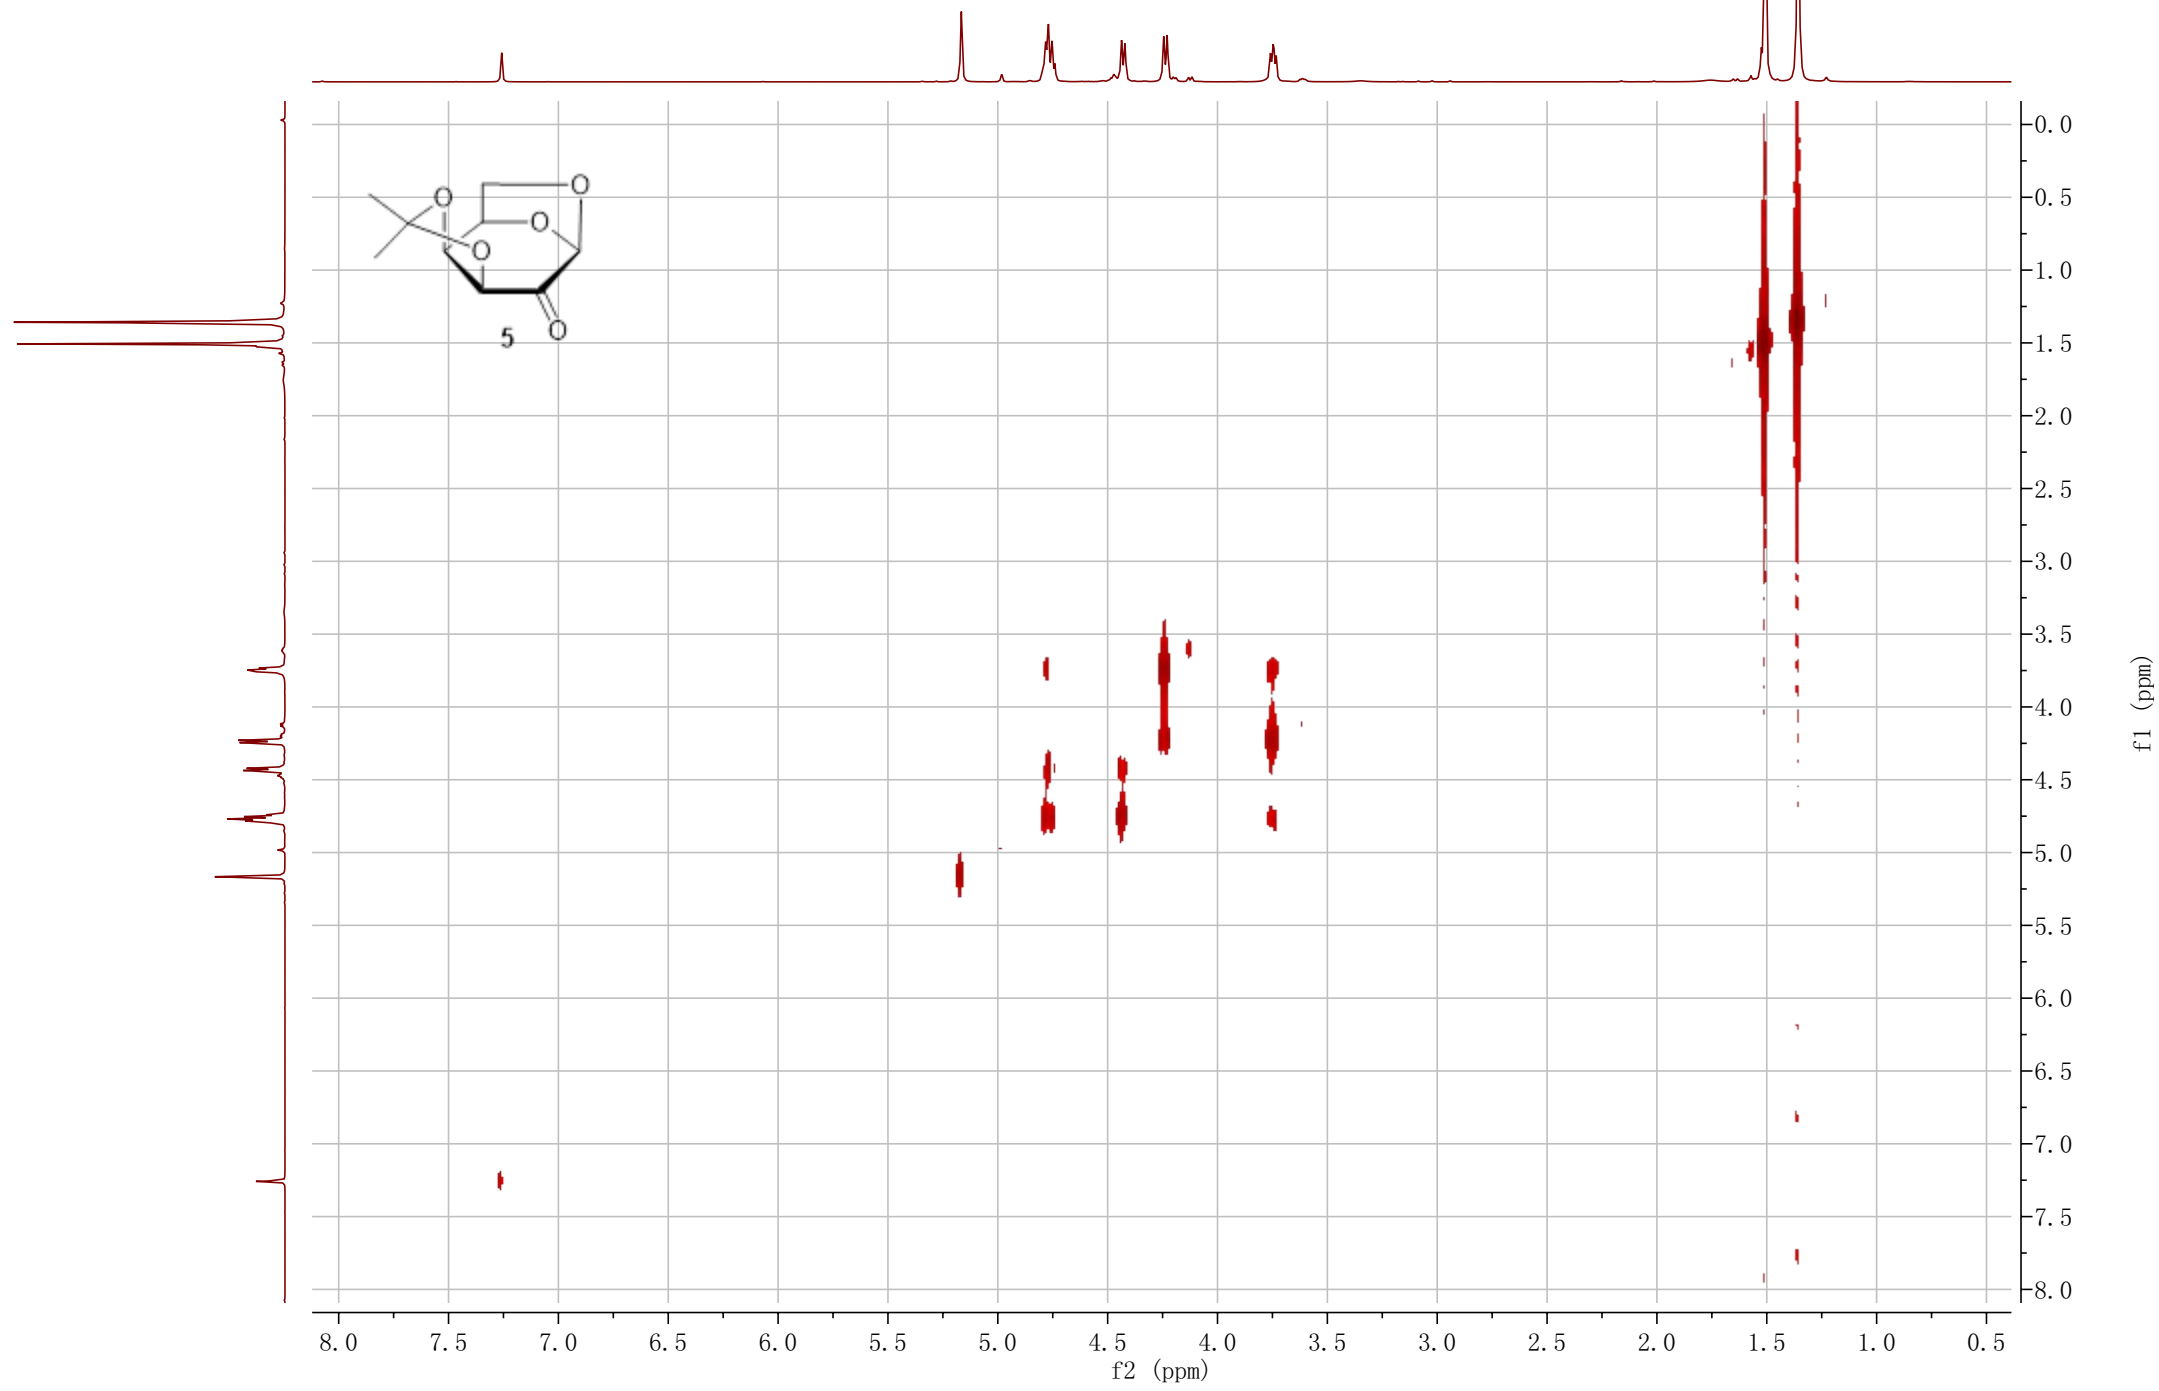

S25

d-chloroform  
—195.9

—112.0

—98.3

74.1

73.3

71.8

—62.9

25.7

24.2

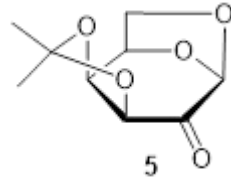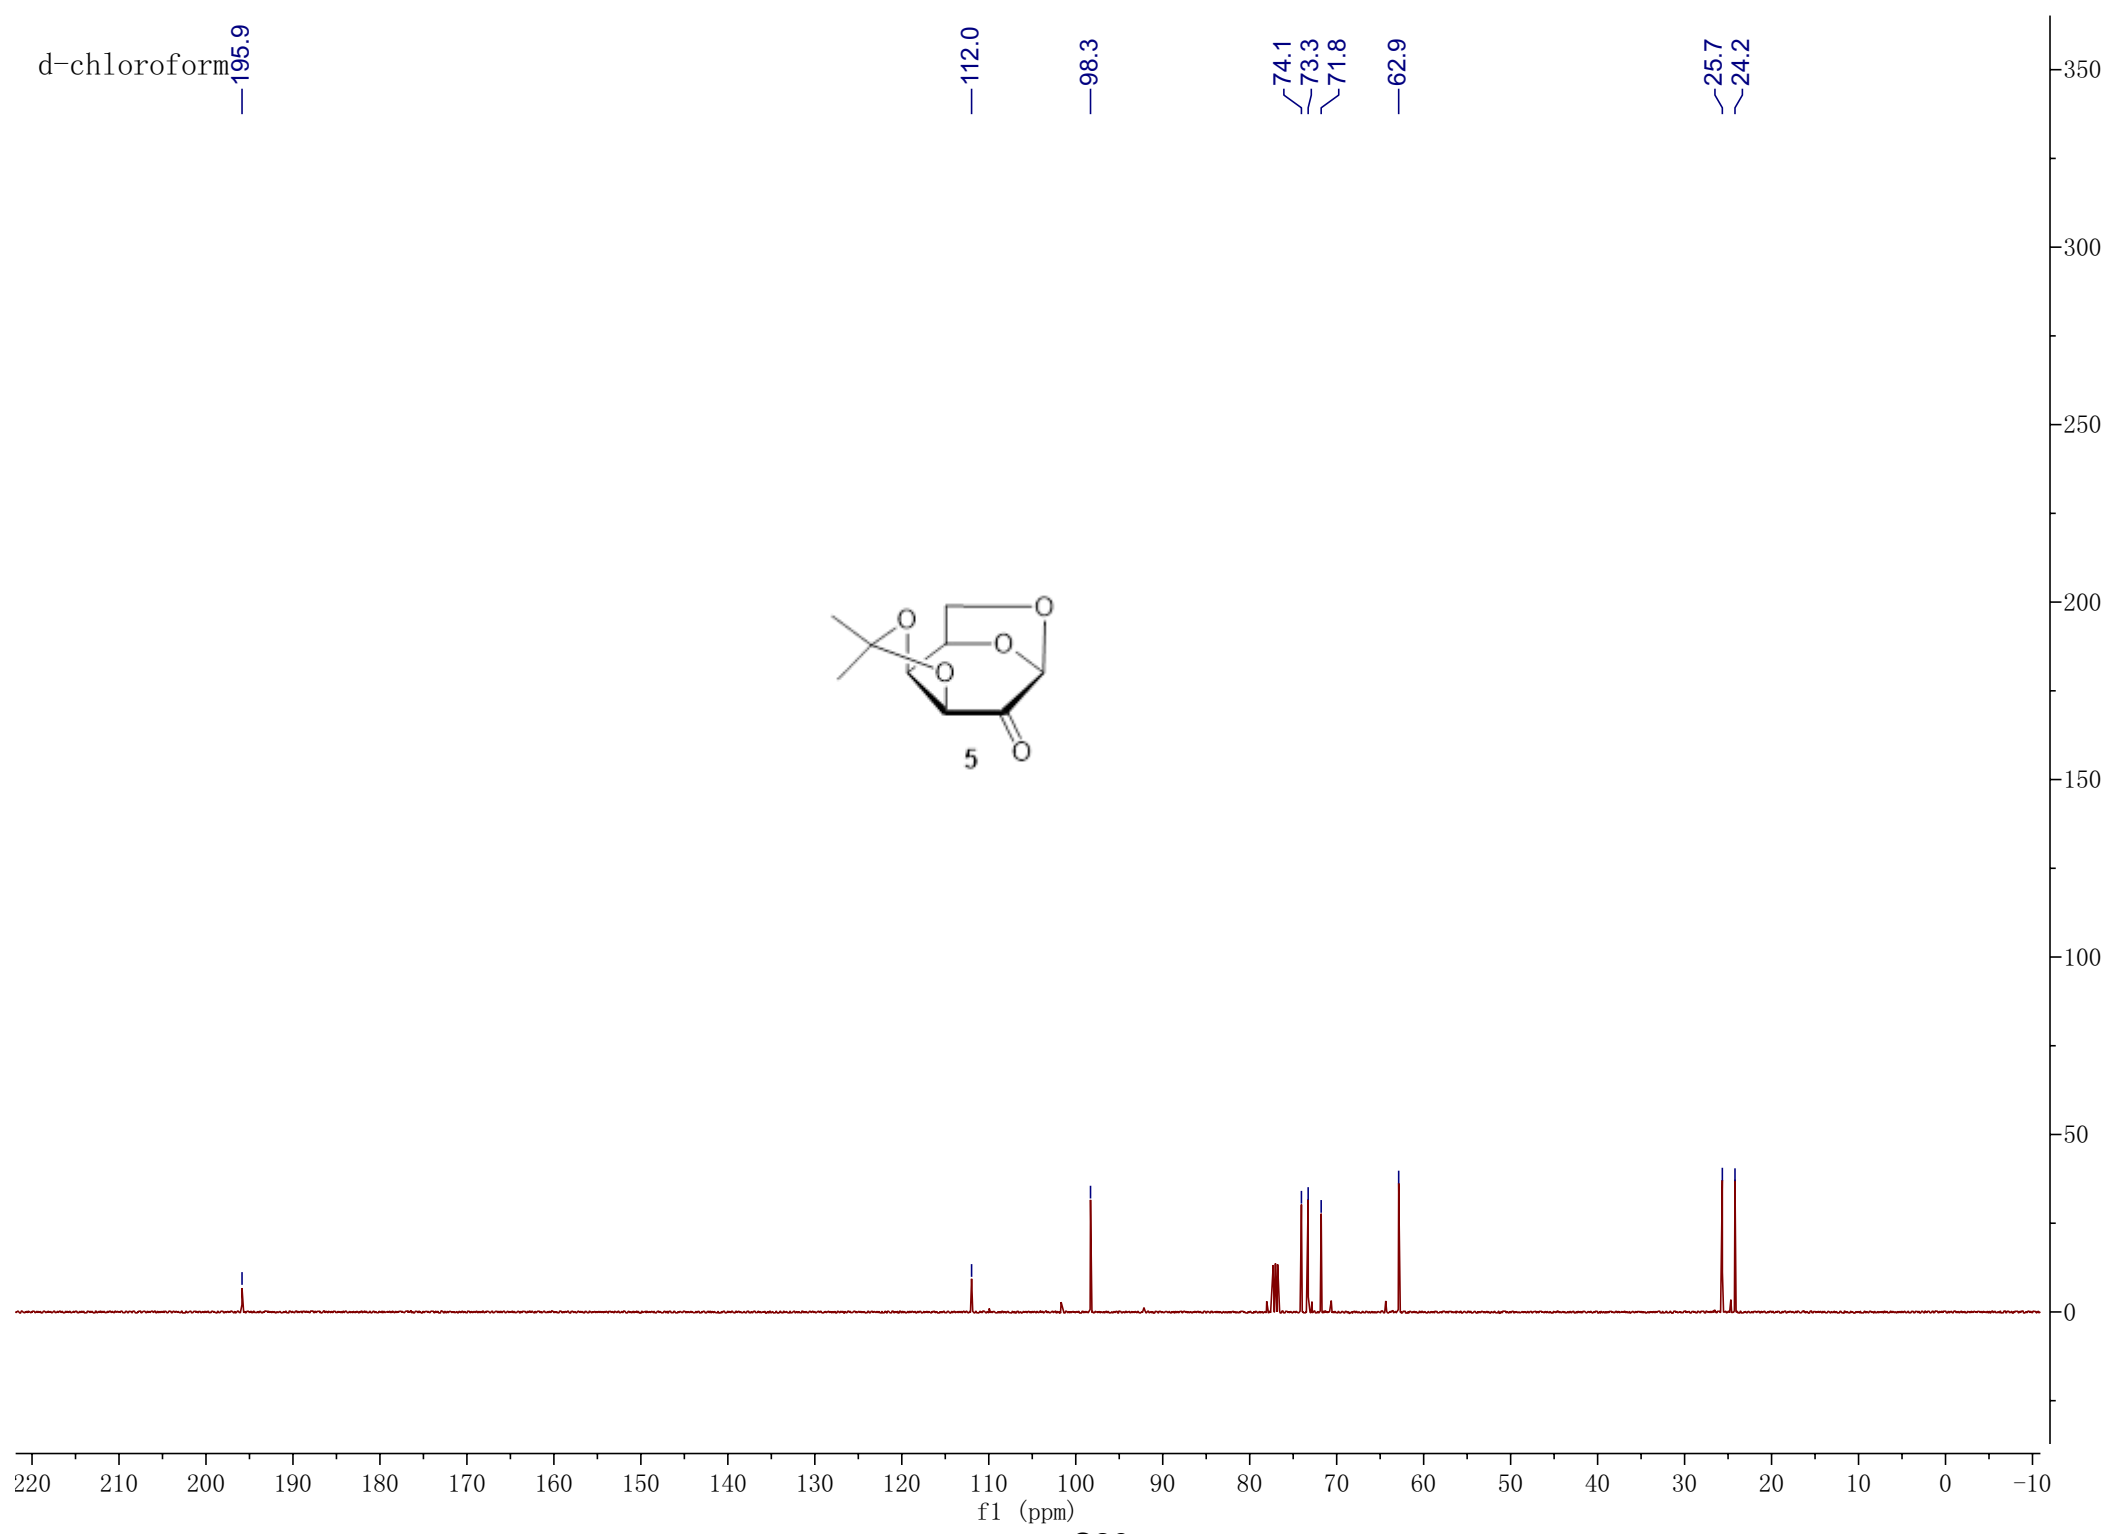

S26

d-chloroform

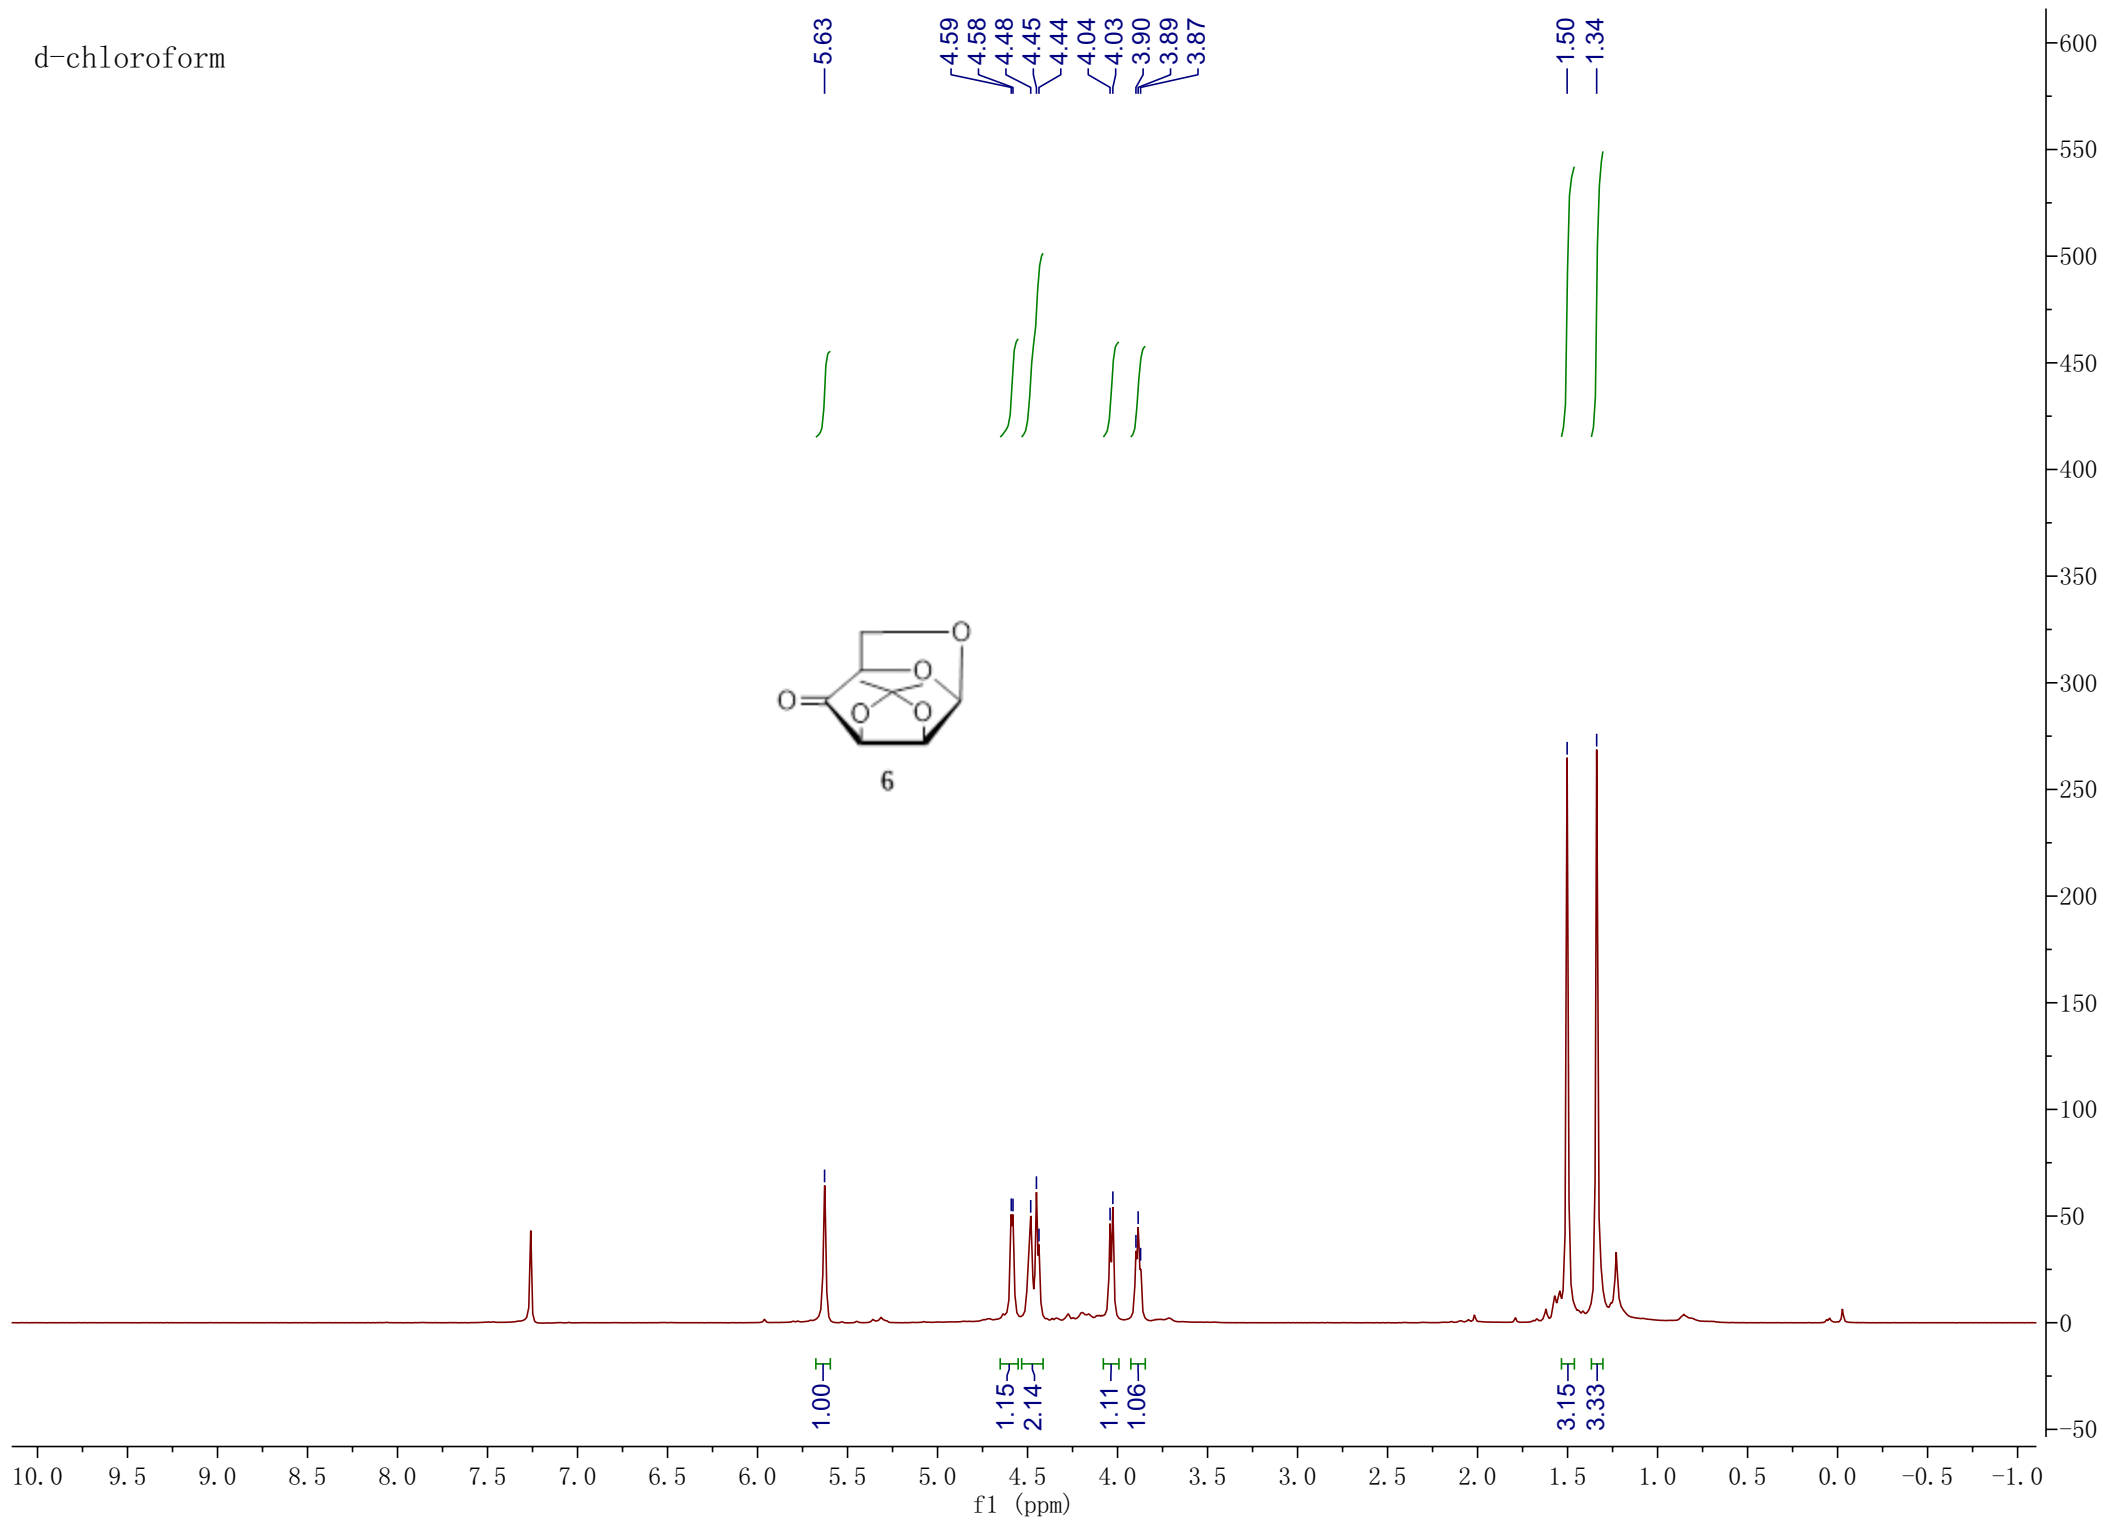

d-chloroform

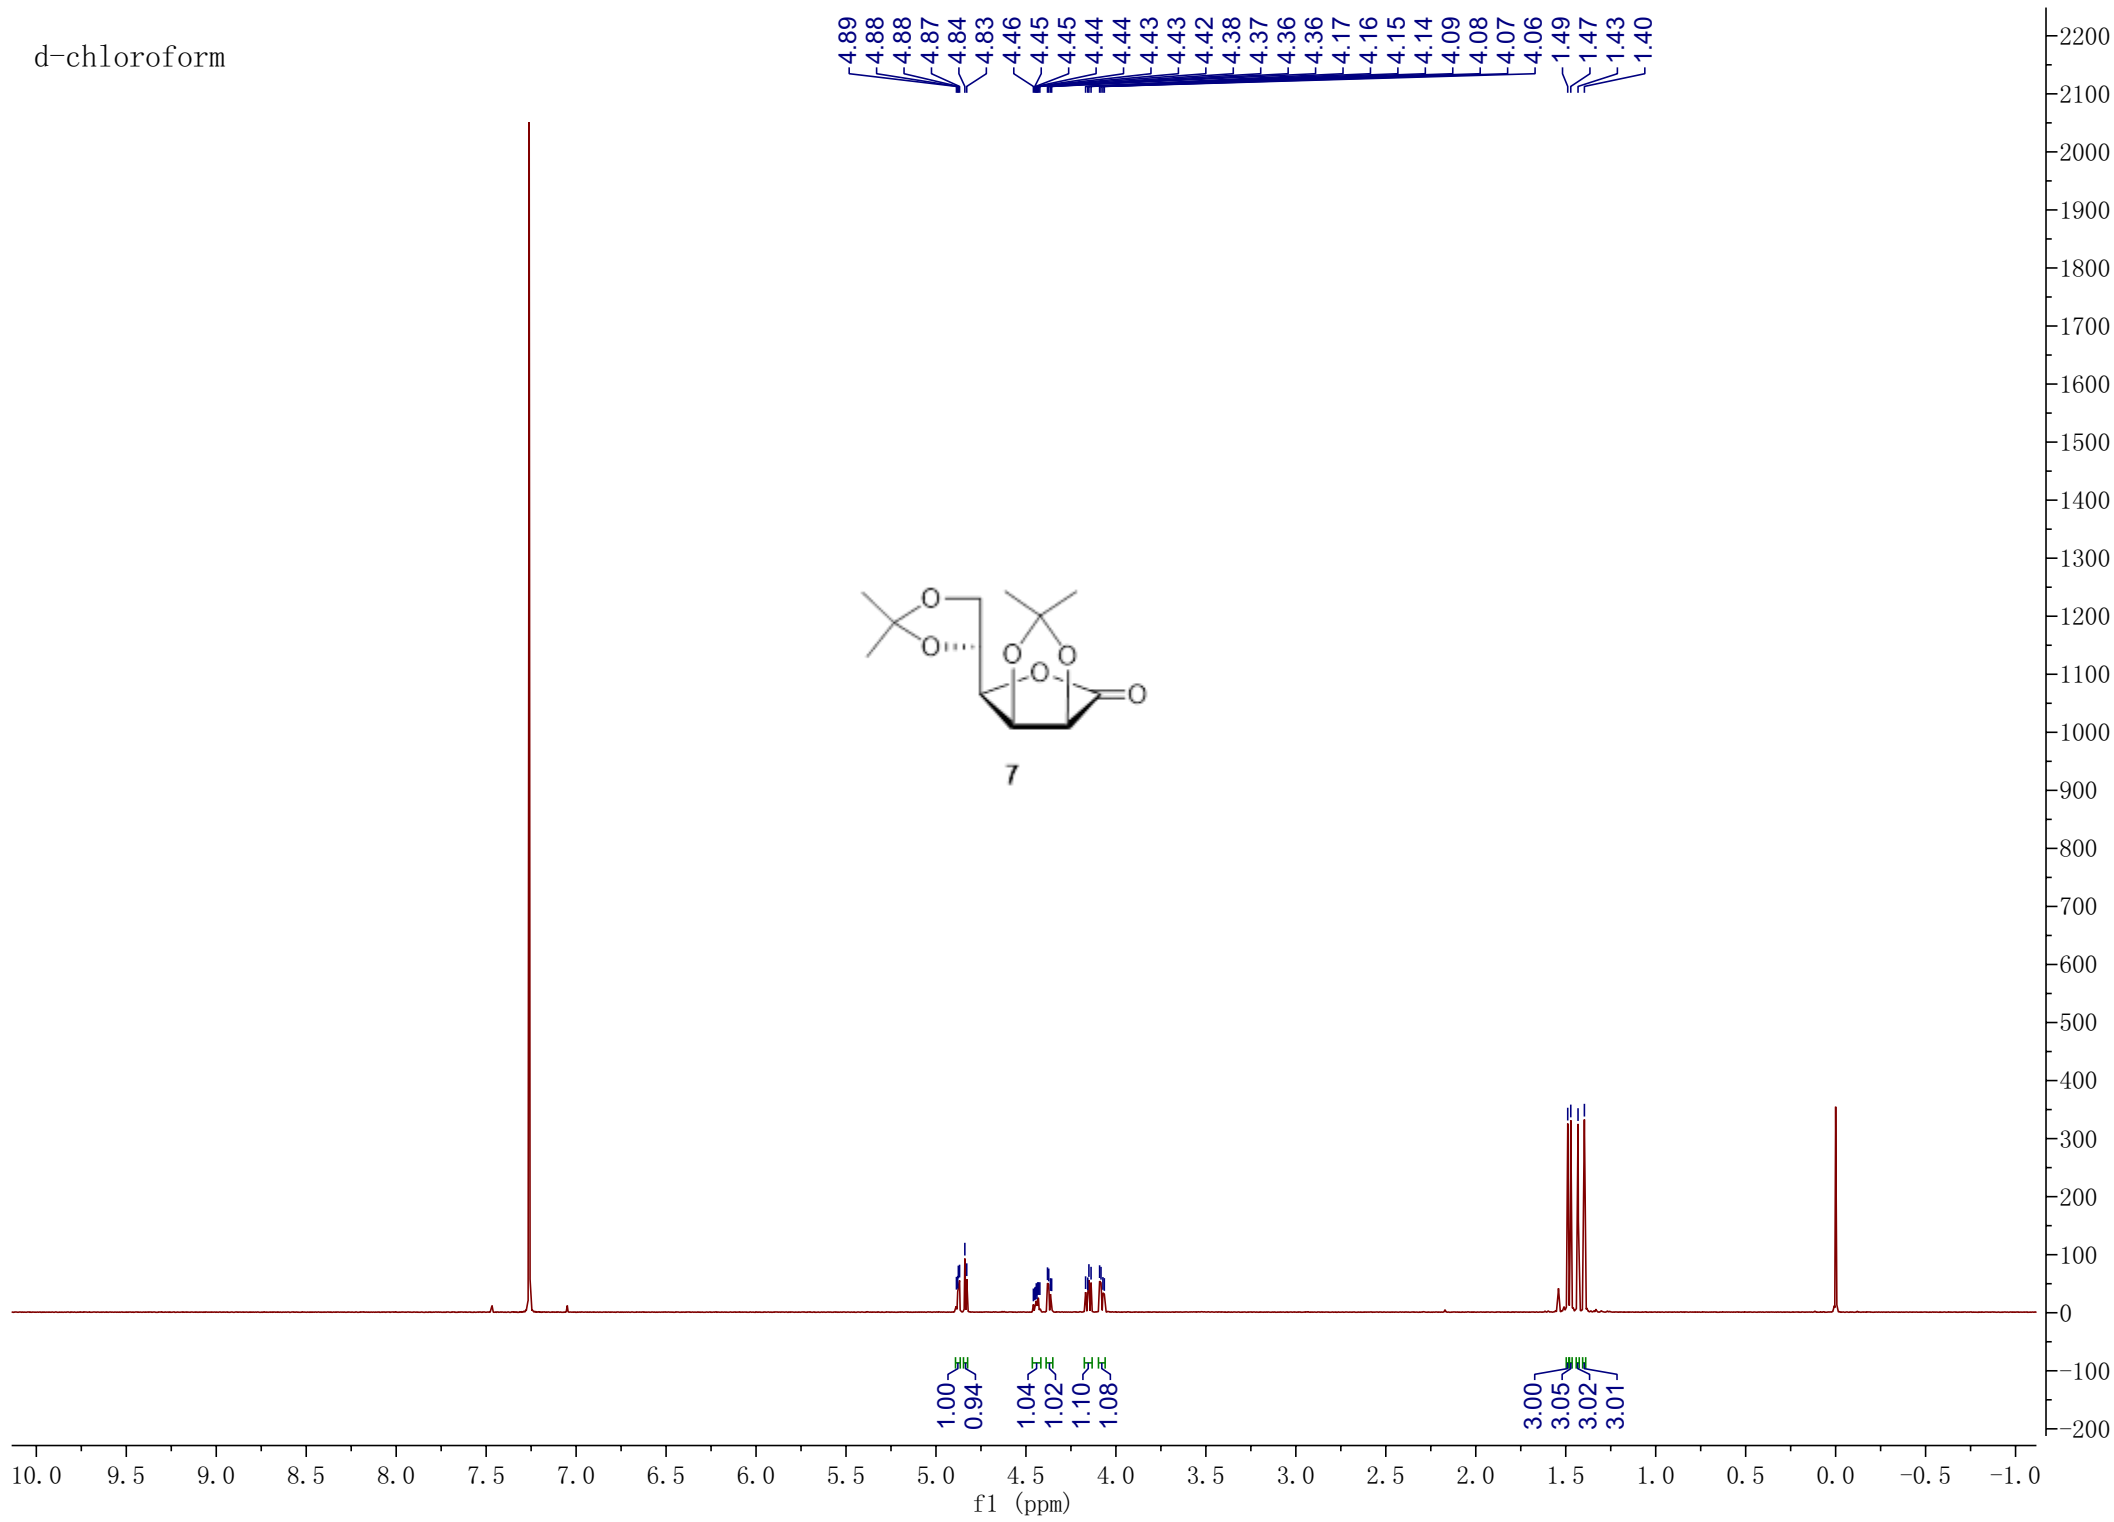

S28

d-chloroform

4.84  
4.83  
4.75  
4.74  
4.74  
4.73  
4.43  
4.42  
4.42  
4.40  
4.22  
4.21  
4.21  
4.20  
4.19  
3.83  
3.82  
3.82  
3.81  
3.80

1.46  
1.46  
1.38  
1.37

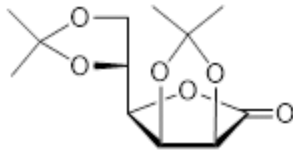

8

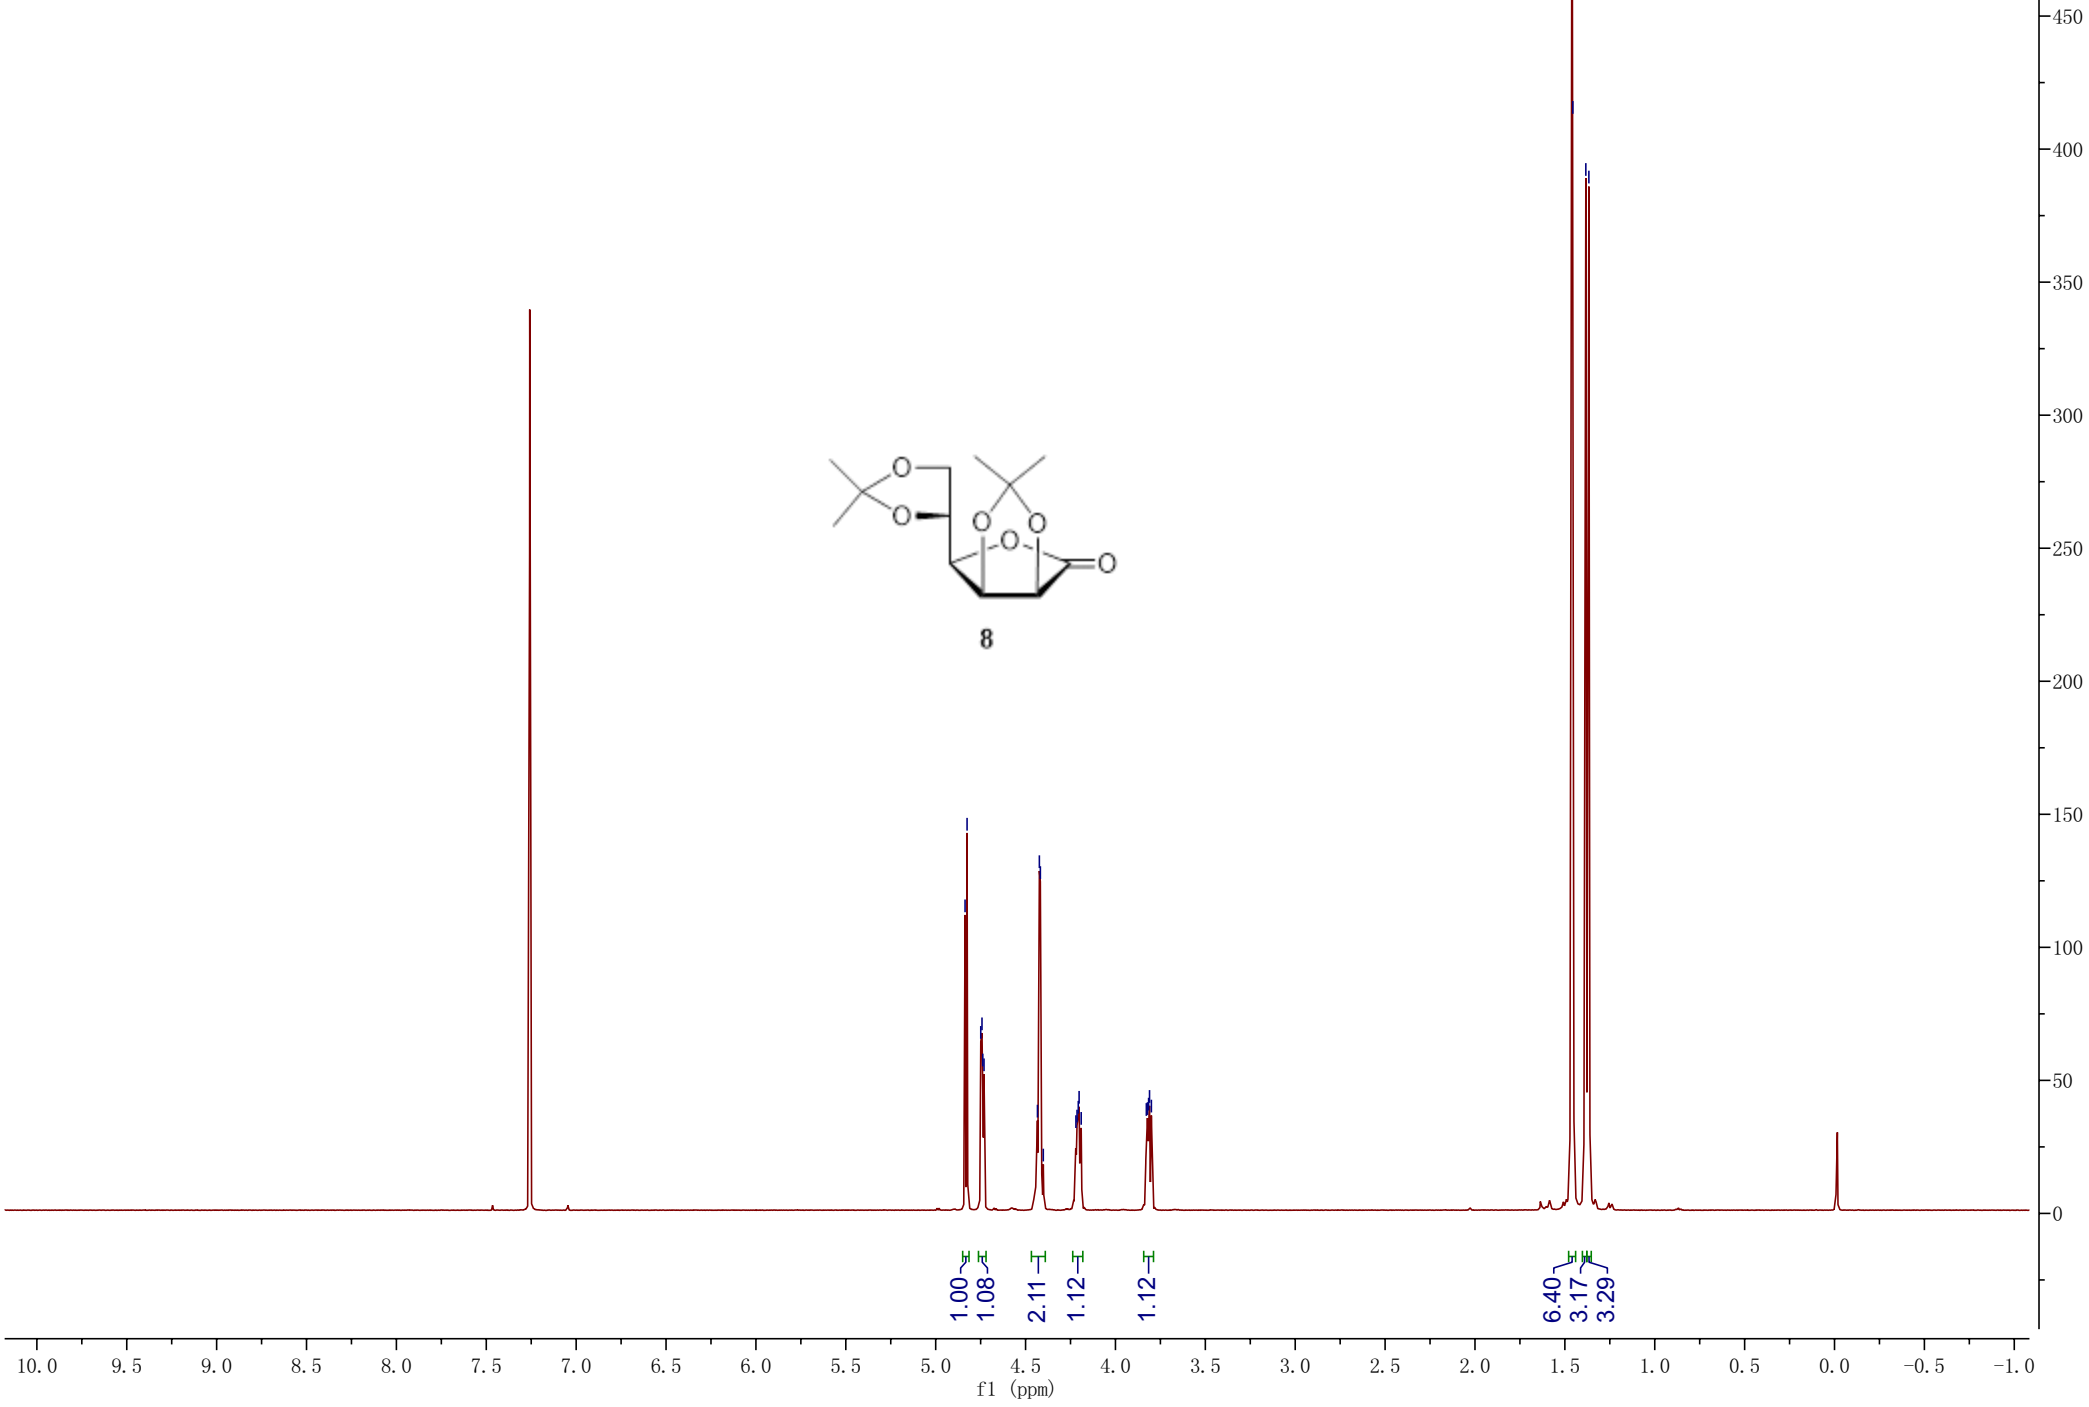

S29

d-chloroform

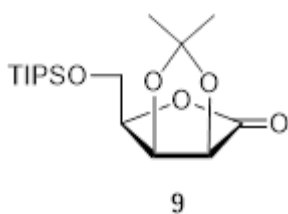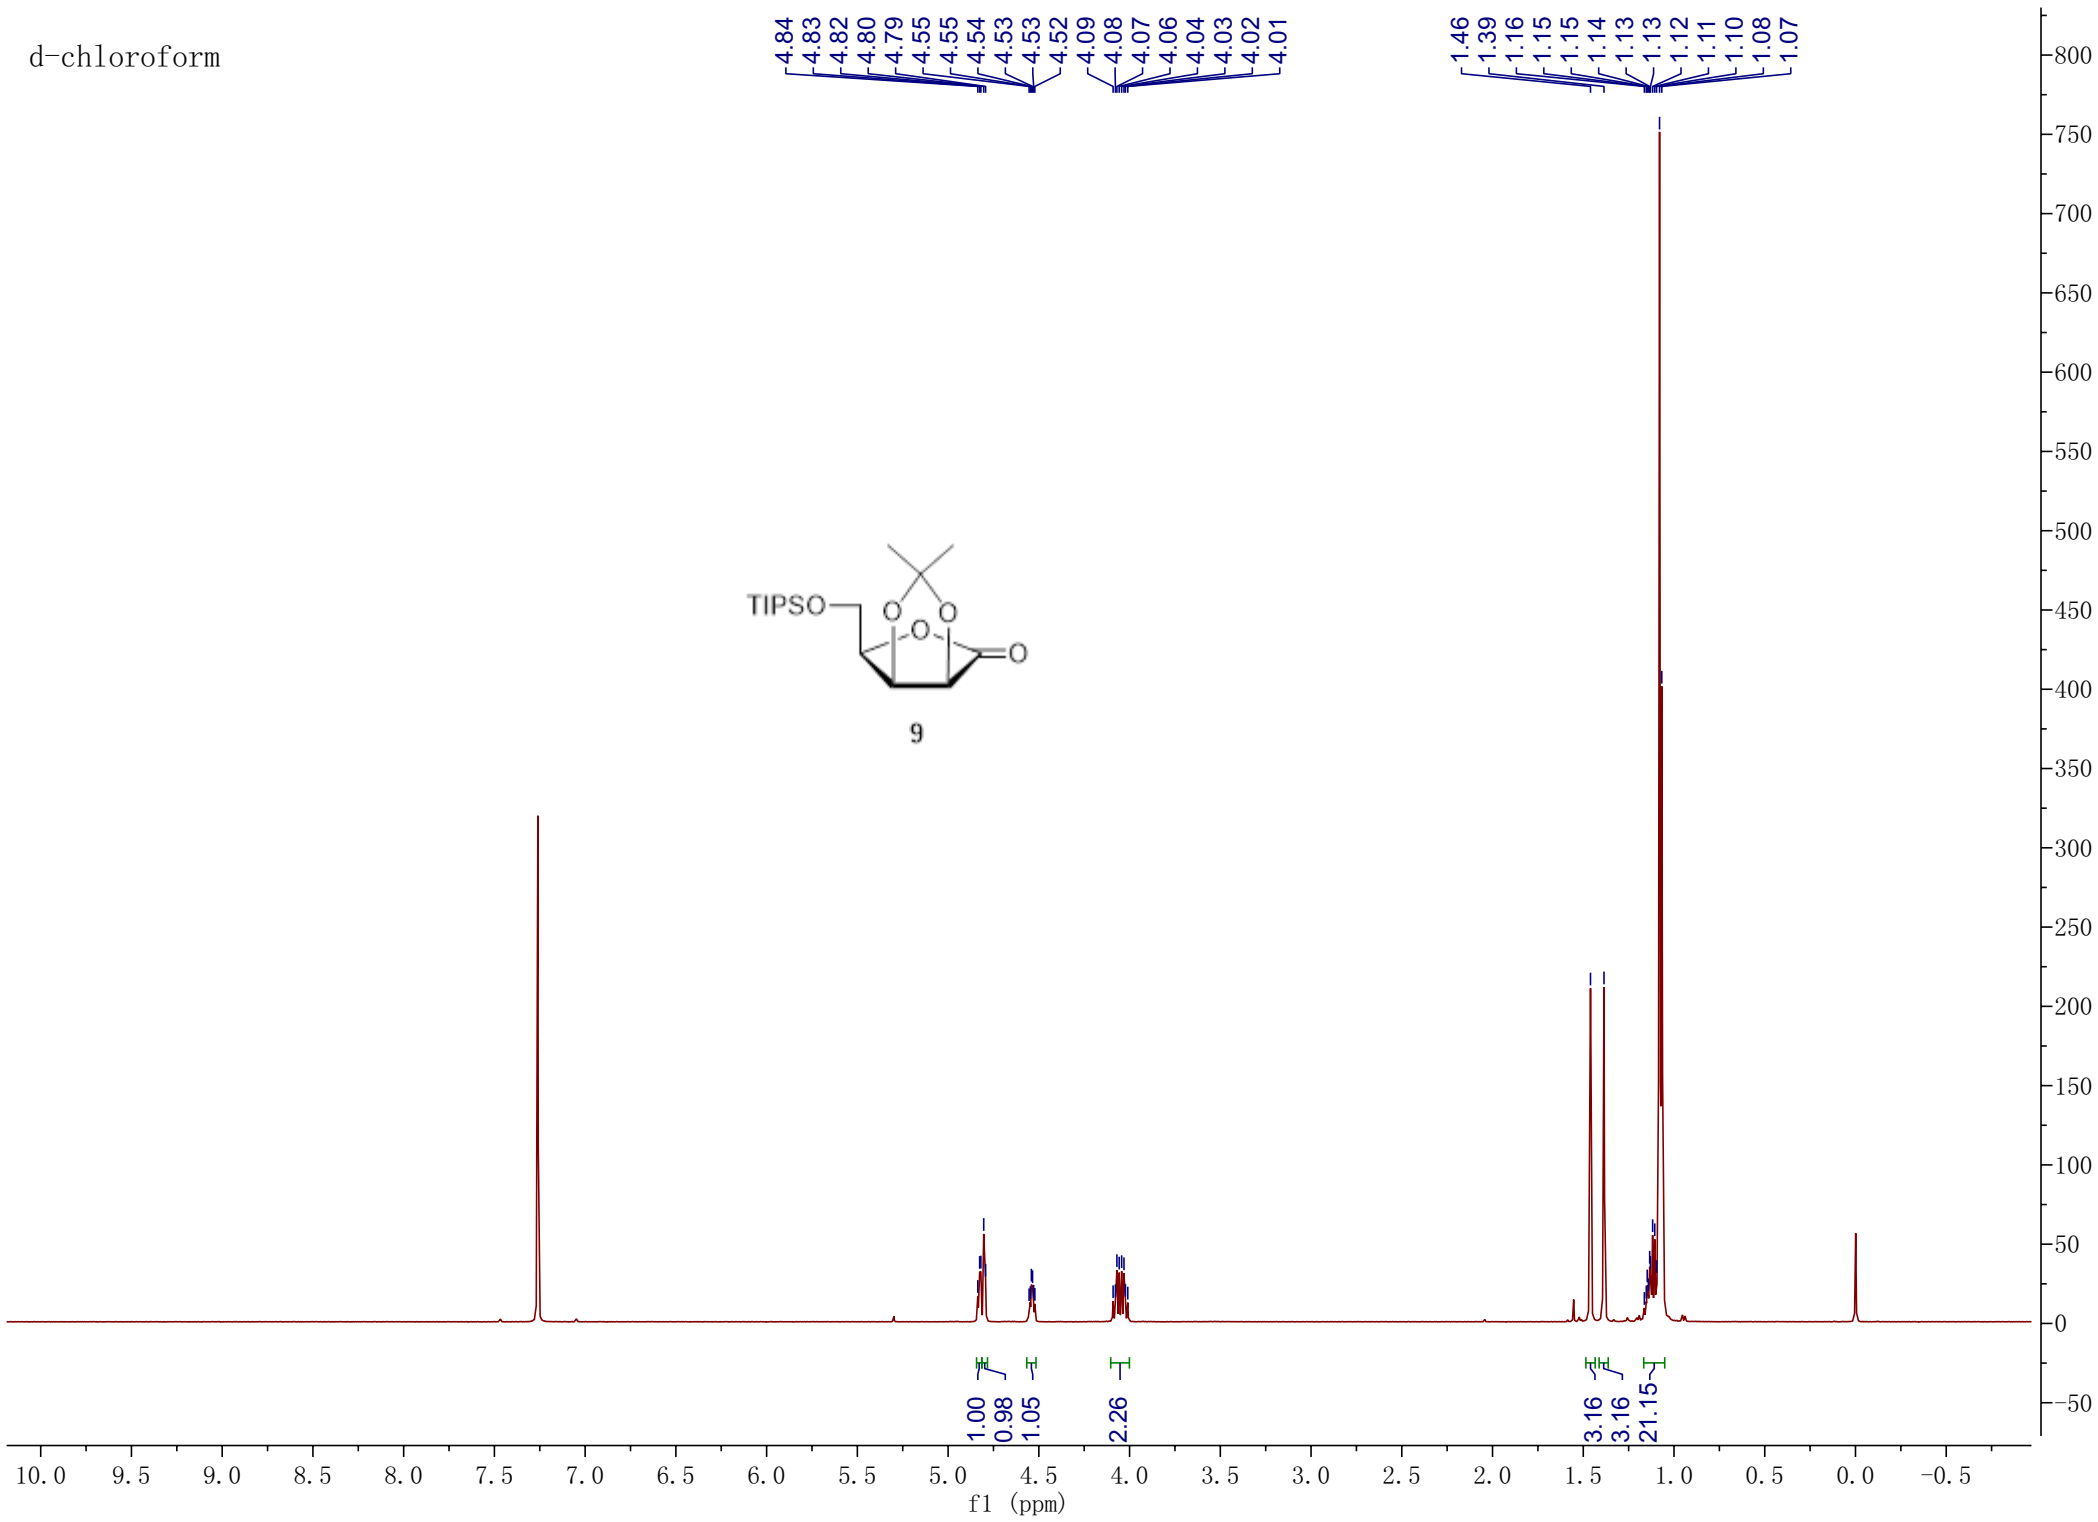

S30

d-chloroform

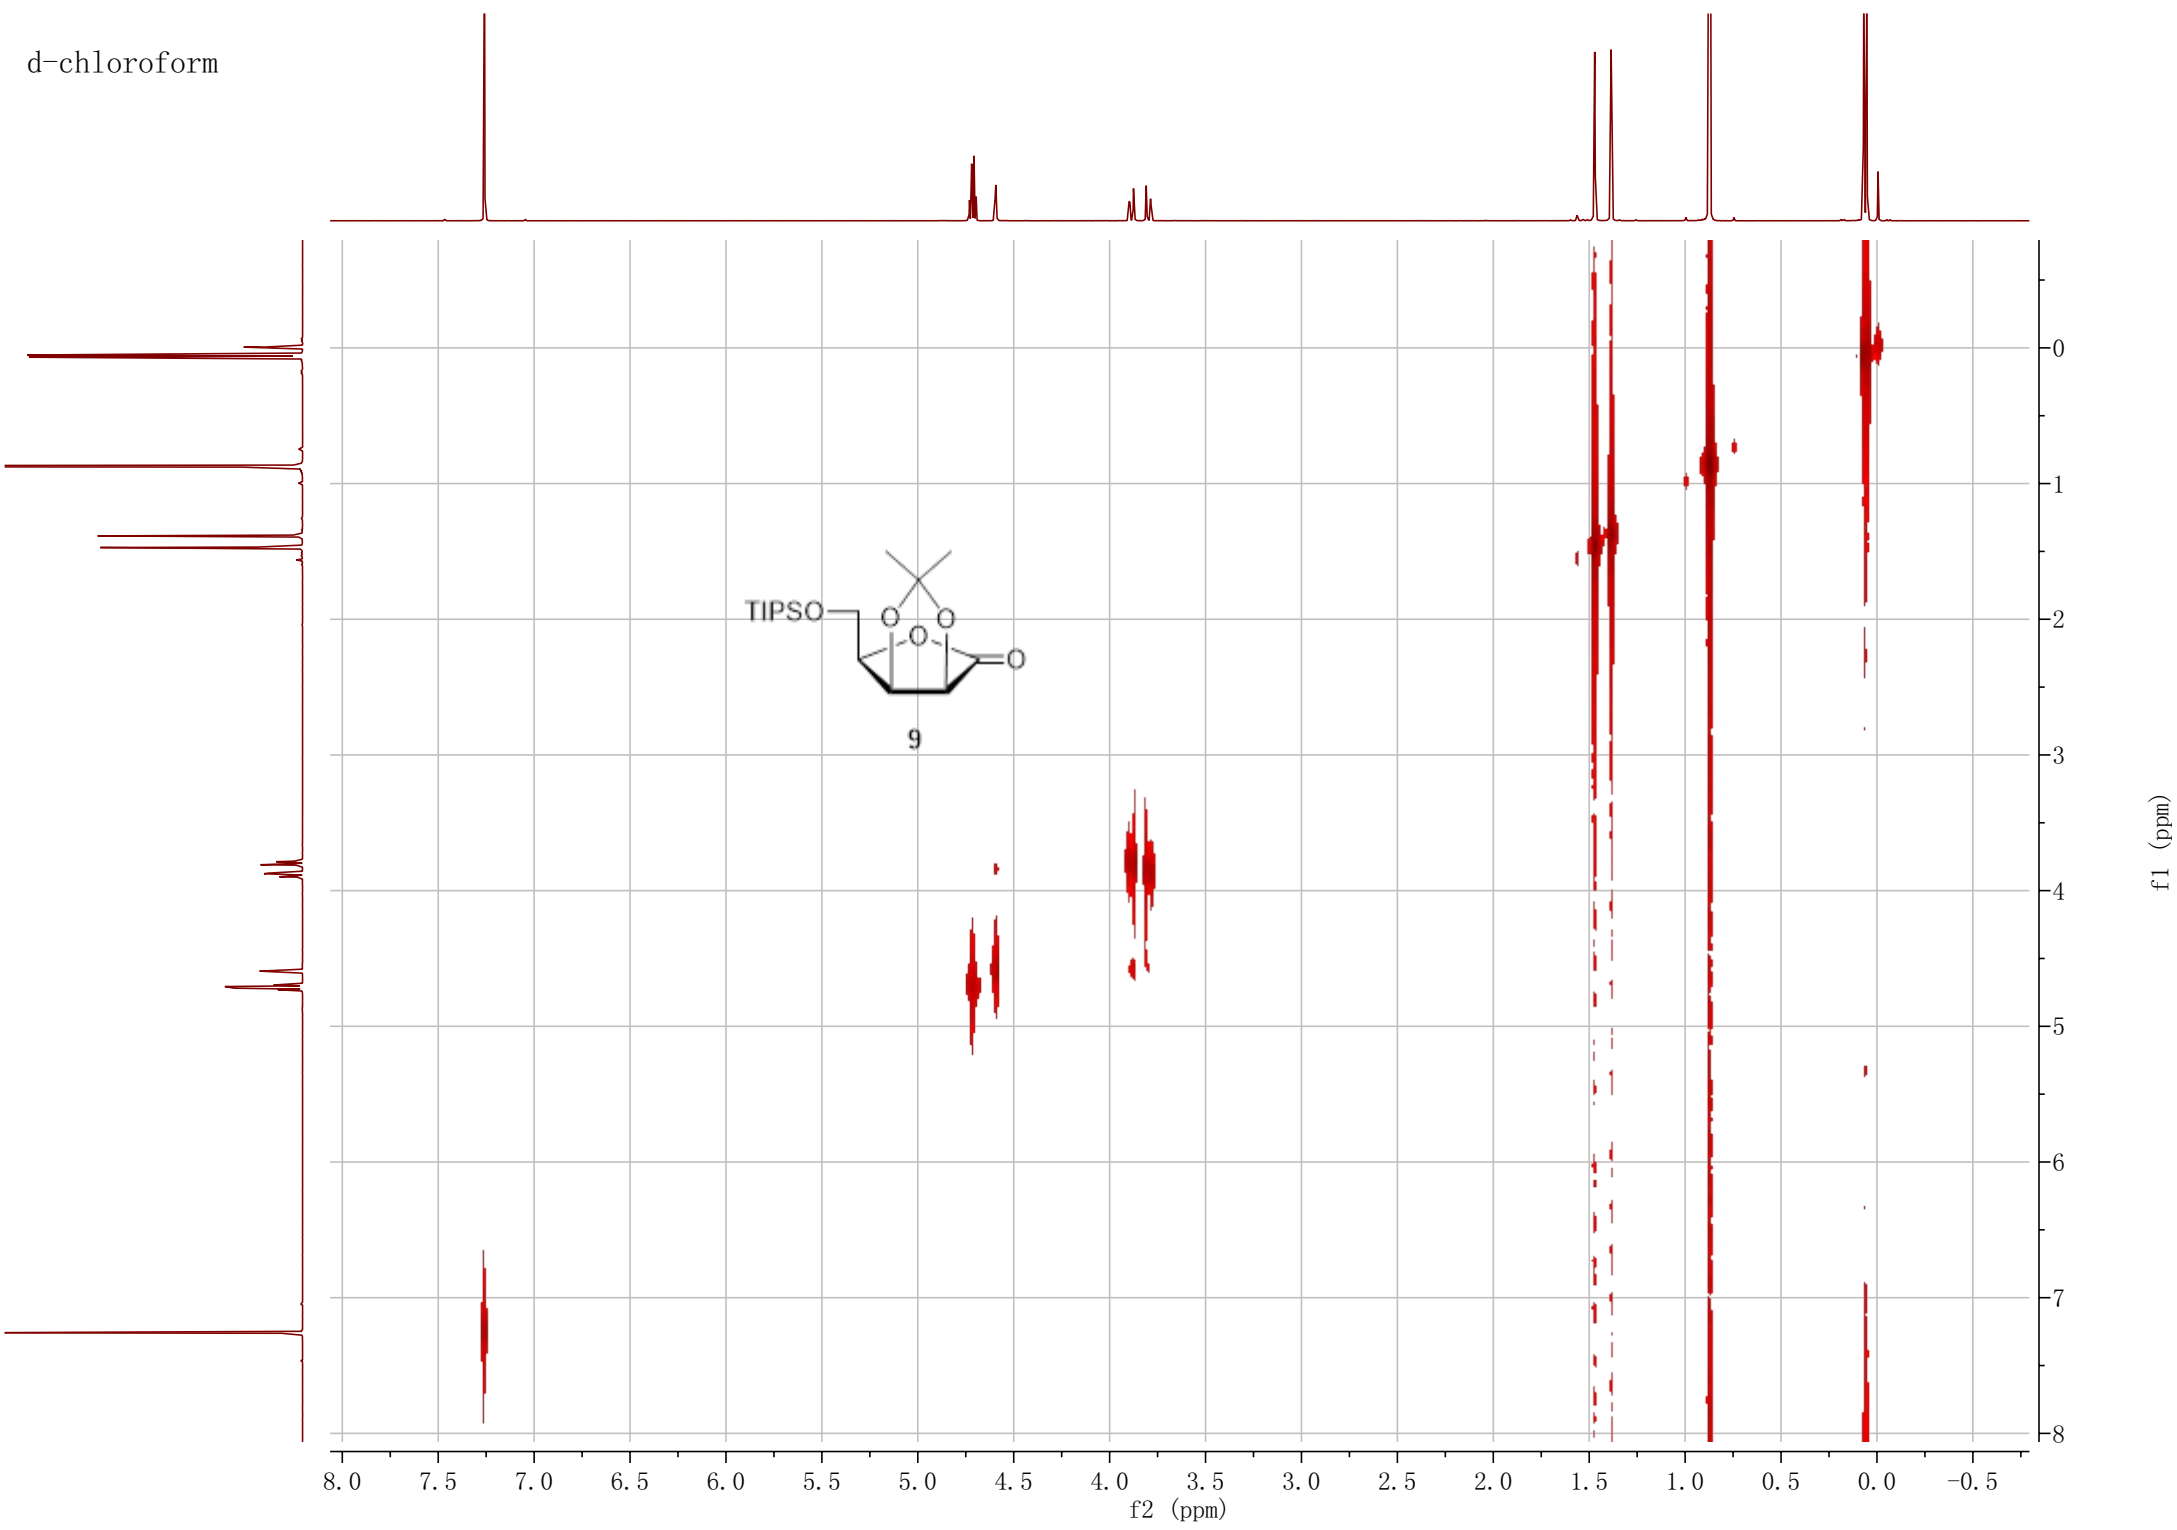

S31

d-chloroform

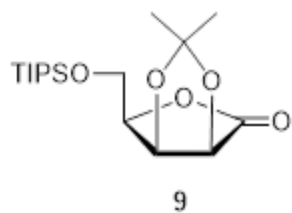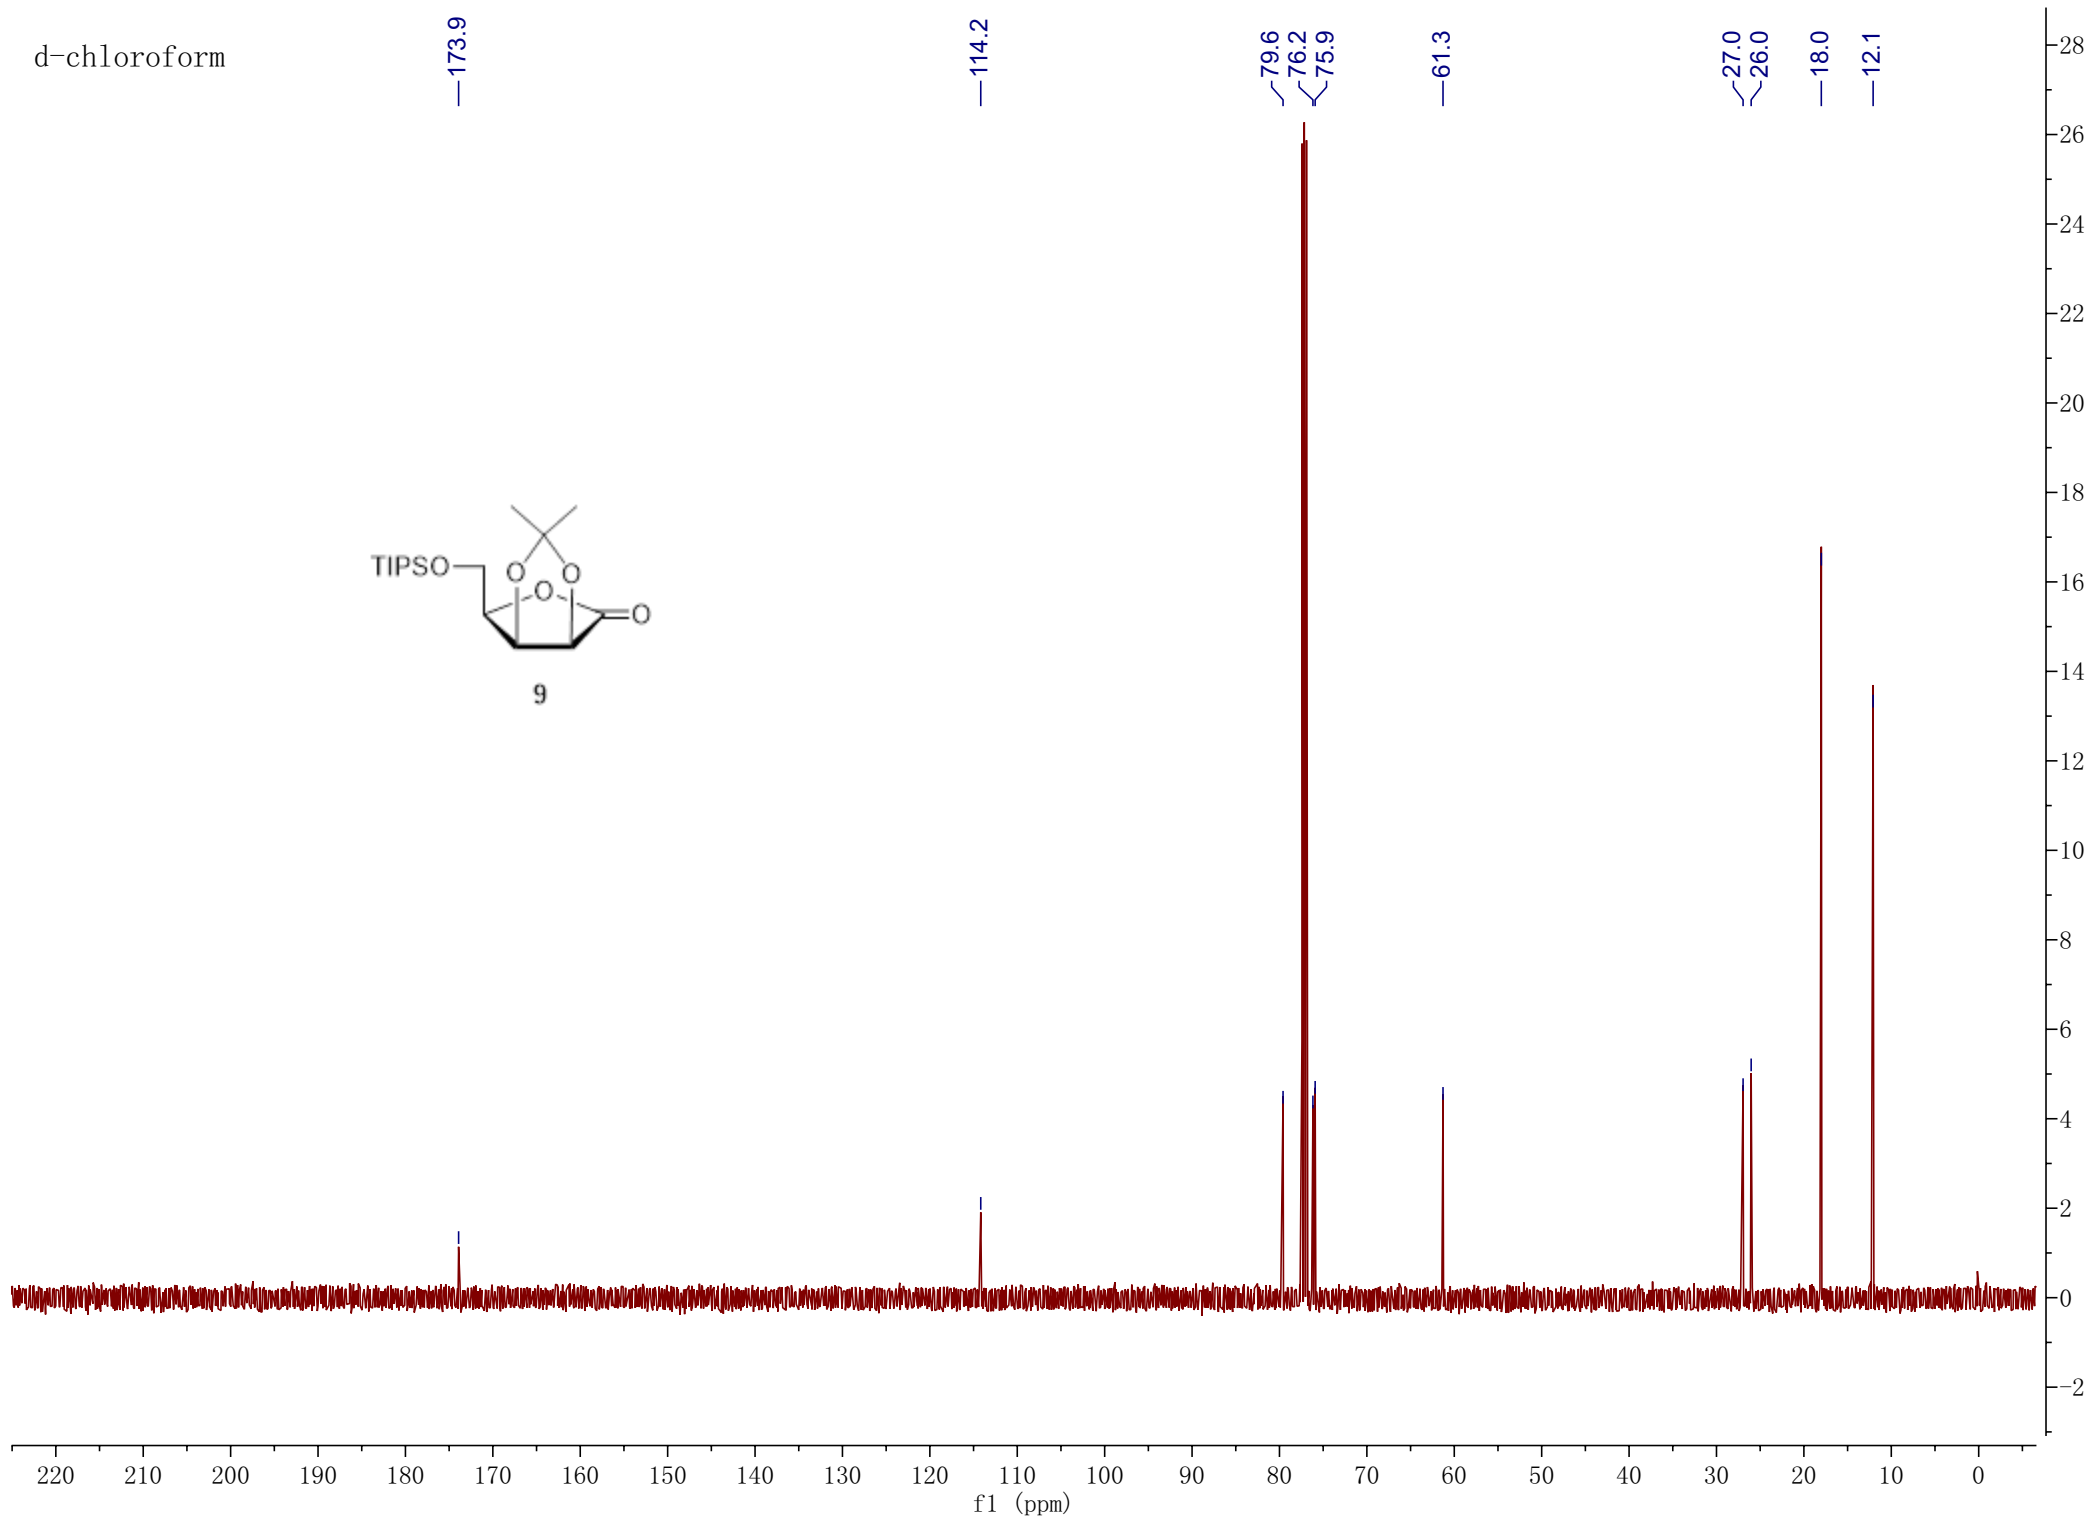



d-chloroform

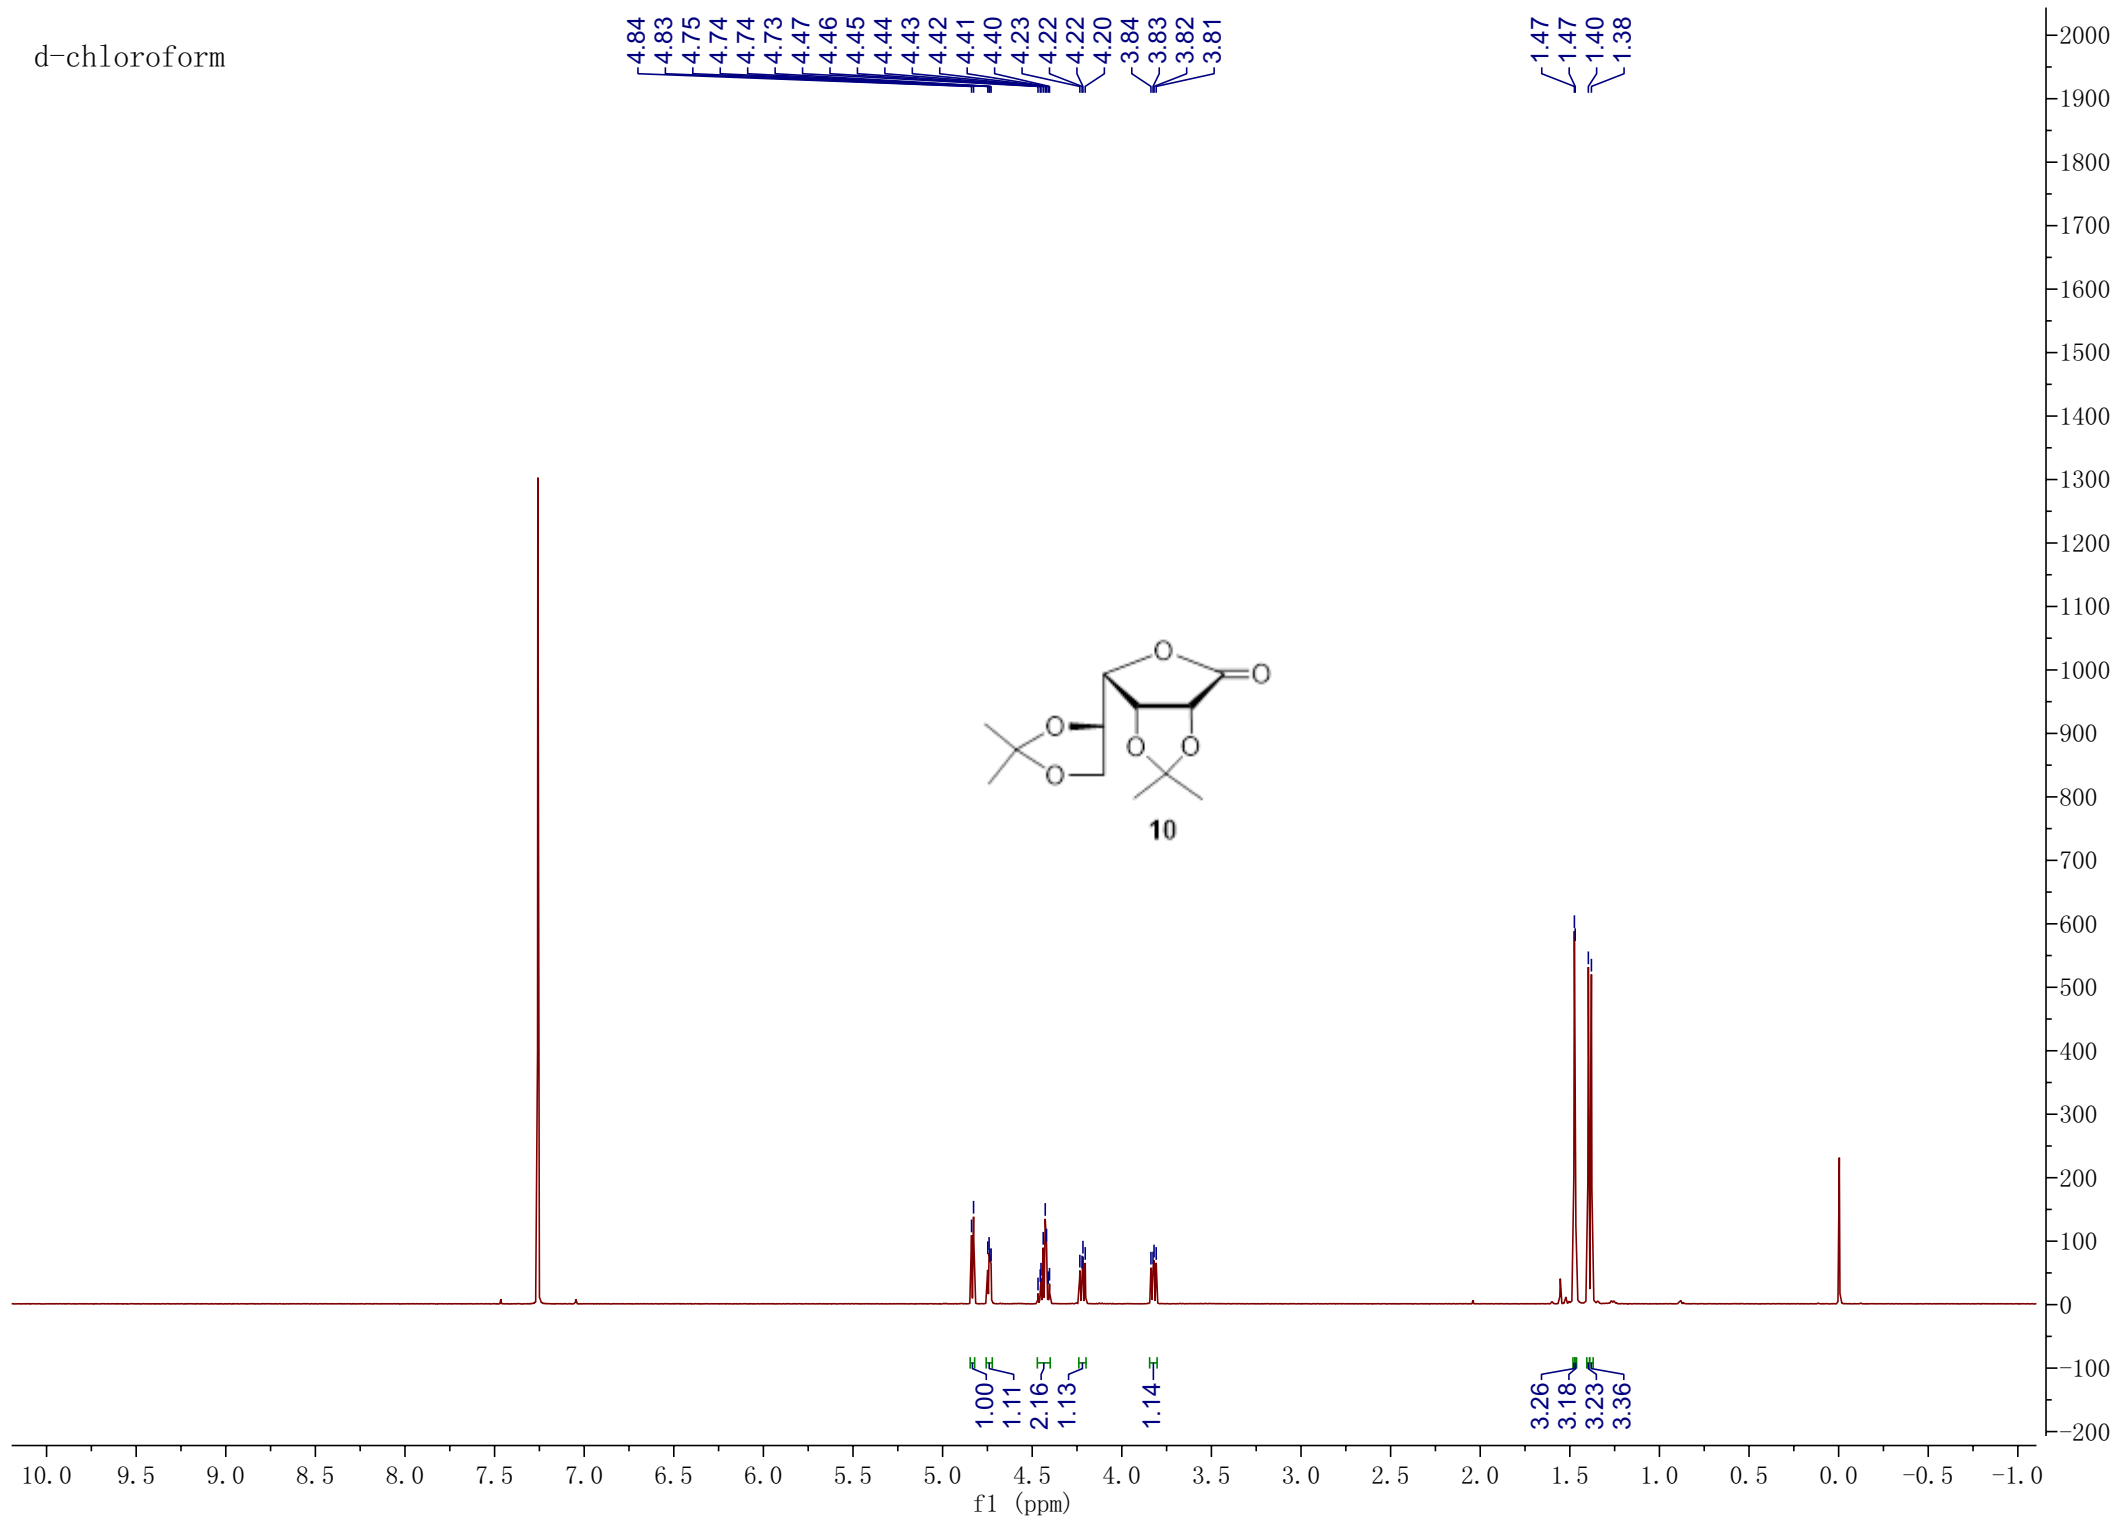

S33

7.77 7.77 7.76 7.75 7.75 7.74 7.74 7.73 7.73 7.71 7.71 7.69 7.69 7.48 7.46 7.45 7.44 7.44 7.42 7.41 7.41 7.40 7.40 7.39 6.09 6.08 5.59 5.58 5.01 5.00 4.63 4.62 4.60 4.43 4.42 4.09 4.08 4.07 4.06 3.92 3.89 3.85 3.84 3.83 3.81 3.79 1.40 1.36 1.33 1.31 1.12 1.10

d-chloroform

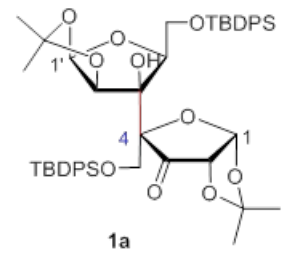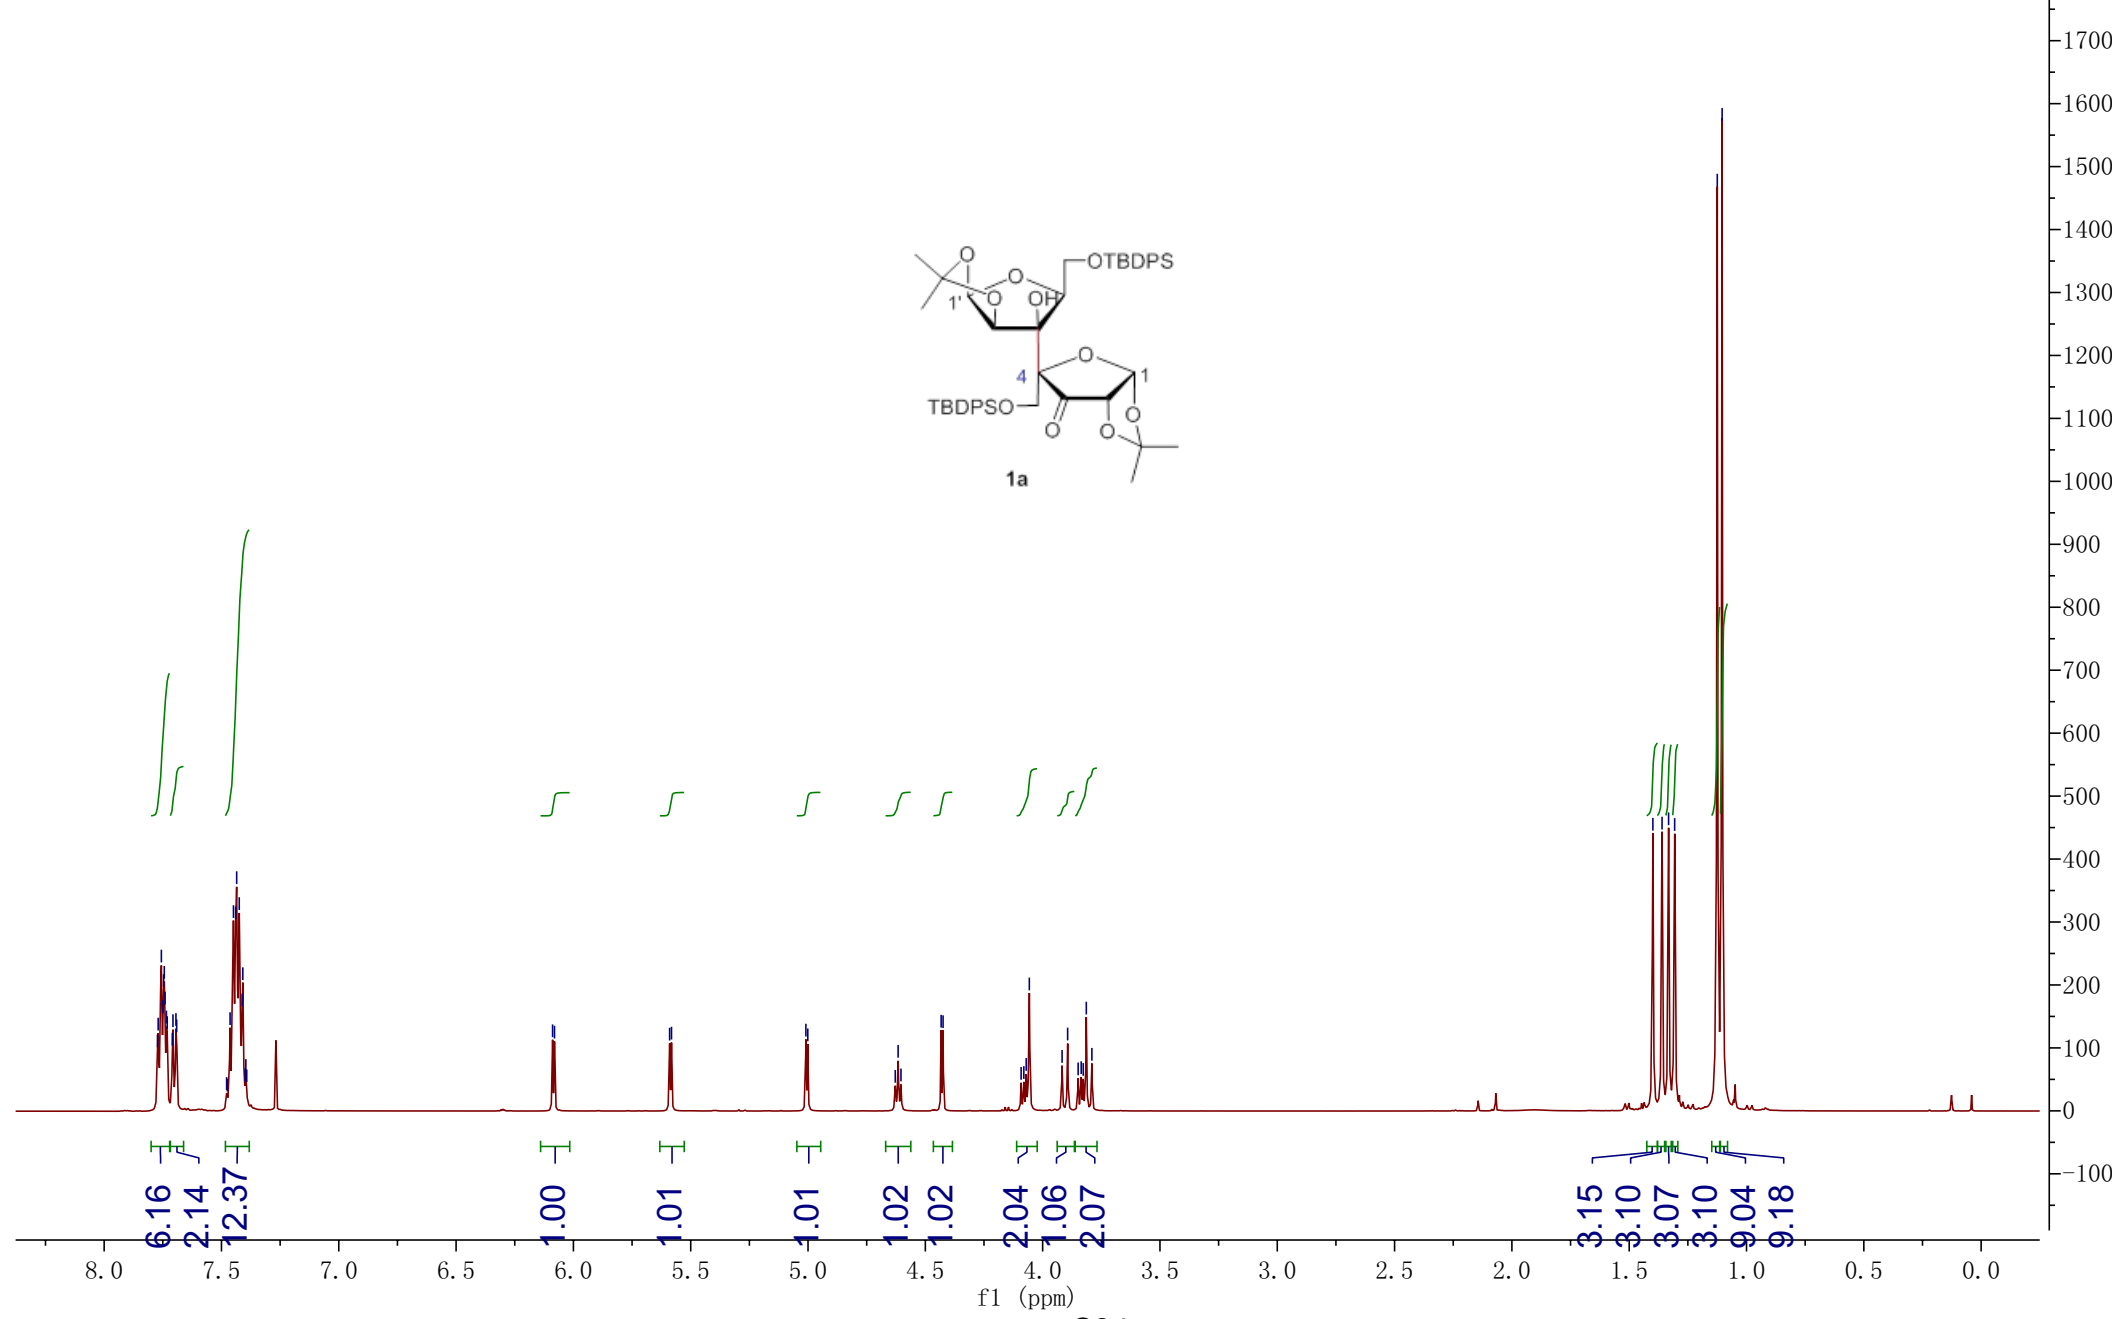

d-chloroform  
—207.7

135.8  
135.8  
135.7  
135.6  
133.1  
132.9  
132.4  
132.2  
130.0  
129.9  
129.8  
127.9  
127.8  
127.8  
127.8  
115.6  
112.9  
105.3  
103.3

89.4  
83.6  
82.3  
79.0  
79.0

64.5  
64.1

27.7  
27.2  
27.0  
26.8  
26.6  
26.3  
19.2  
19.2

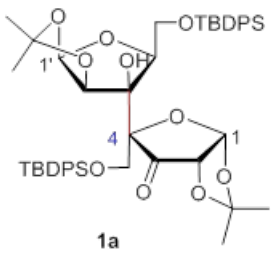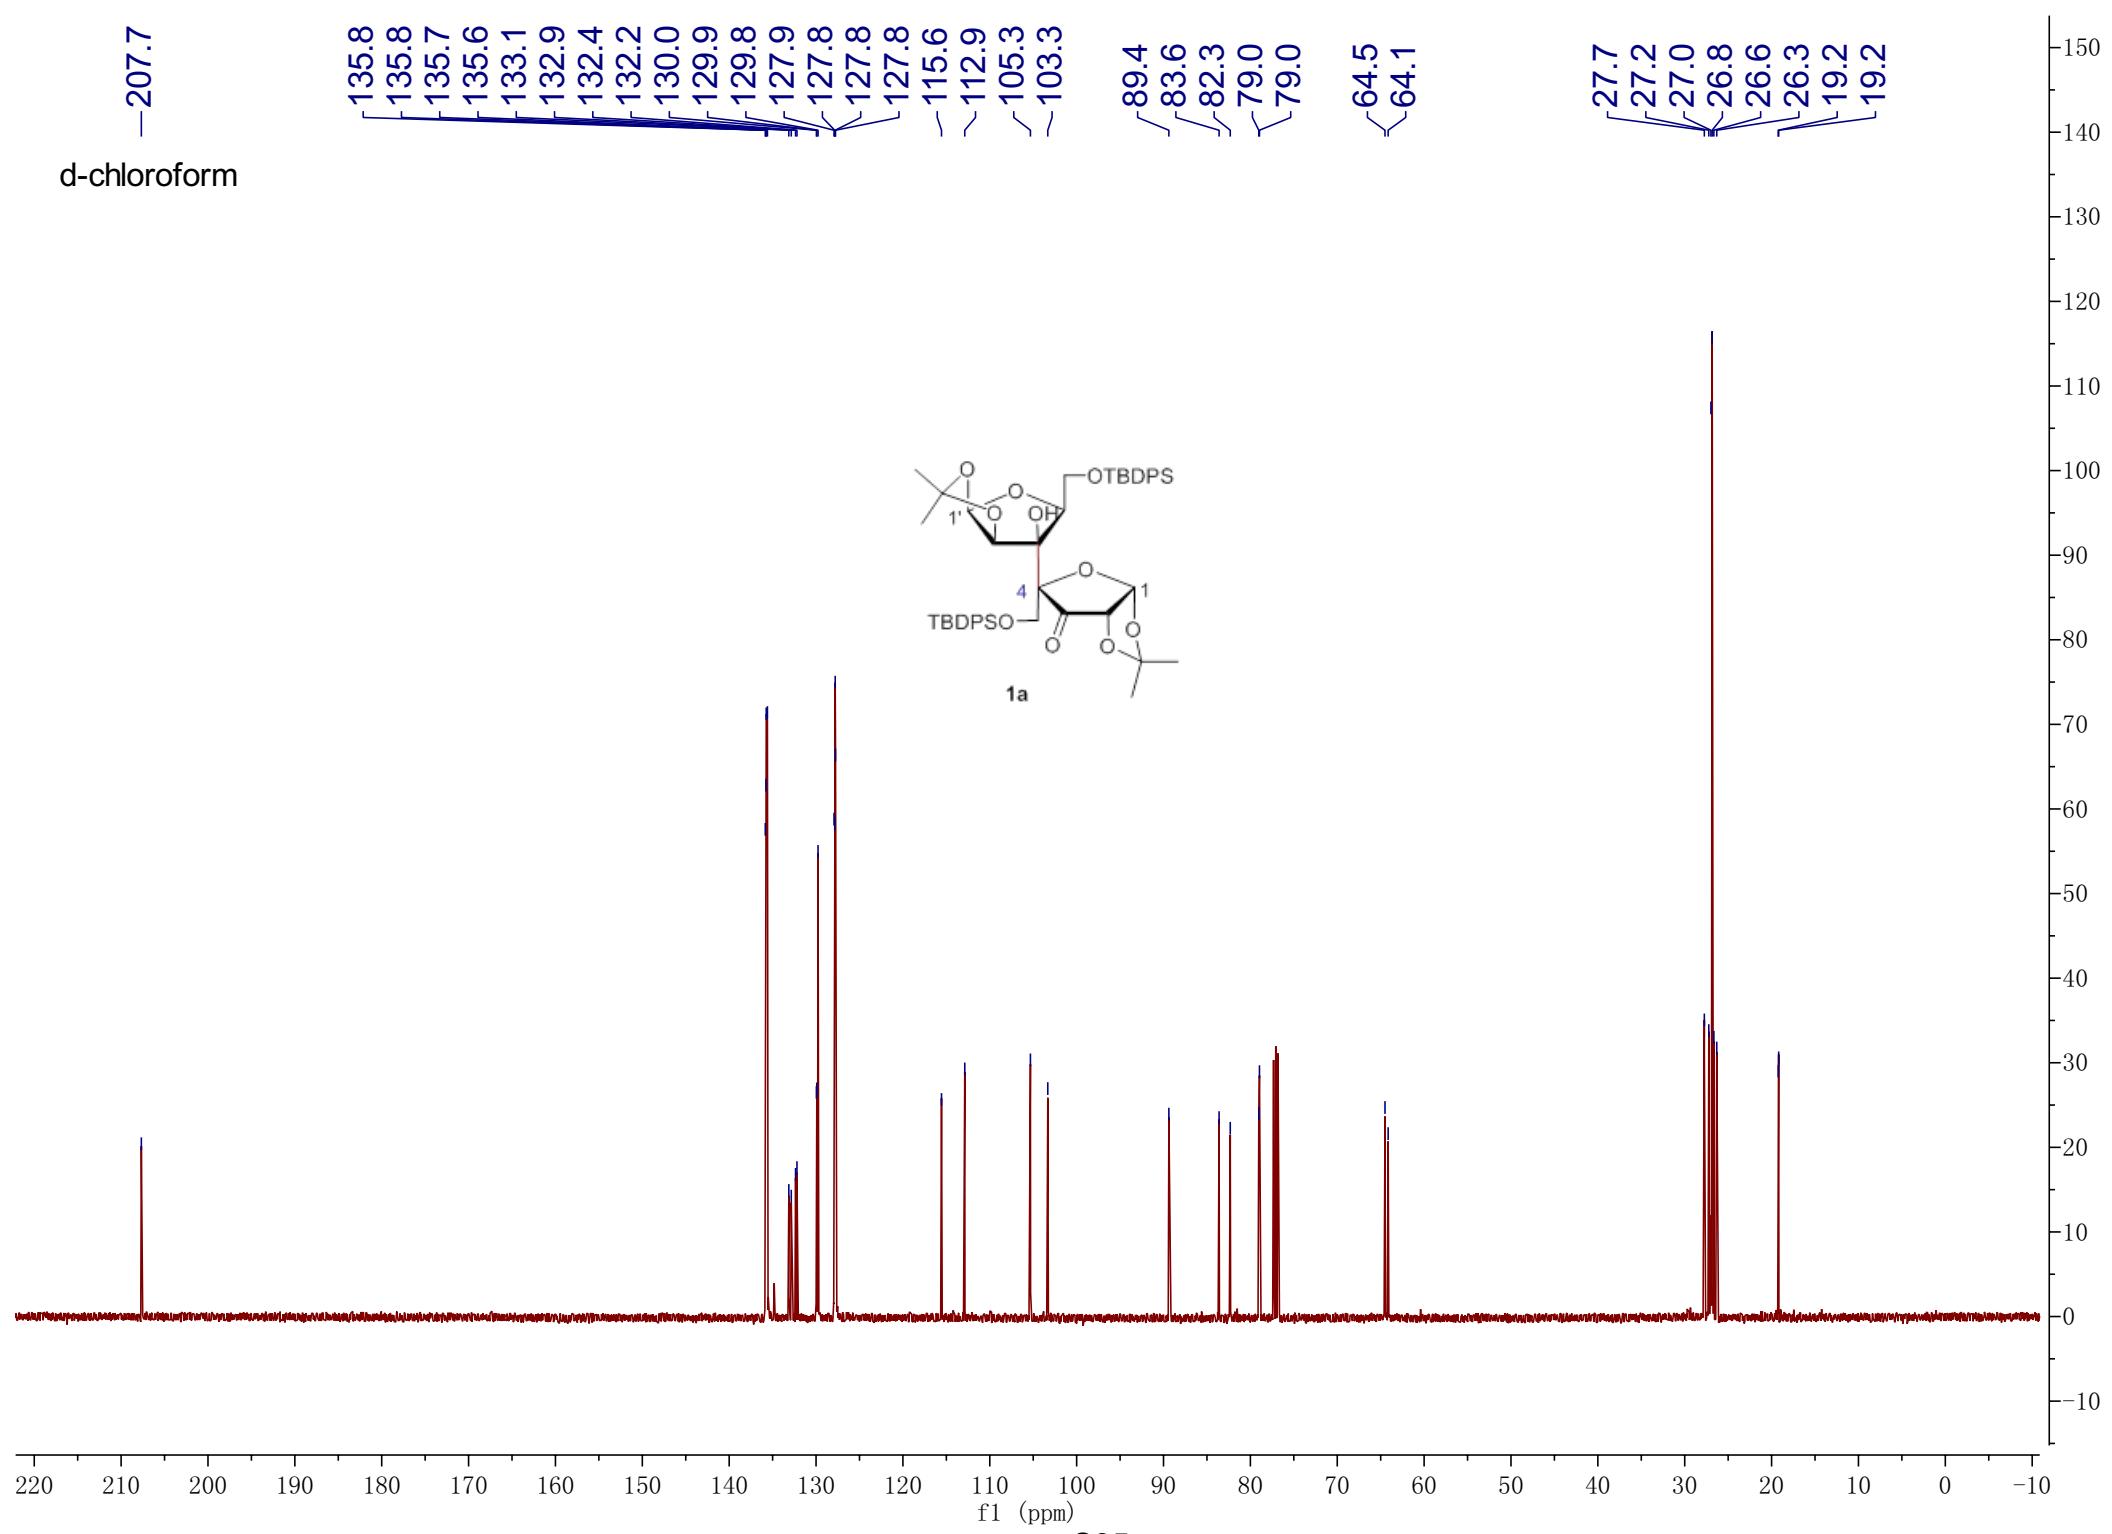

COSY

d-chloroform

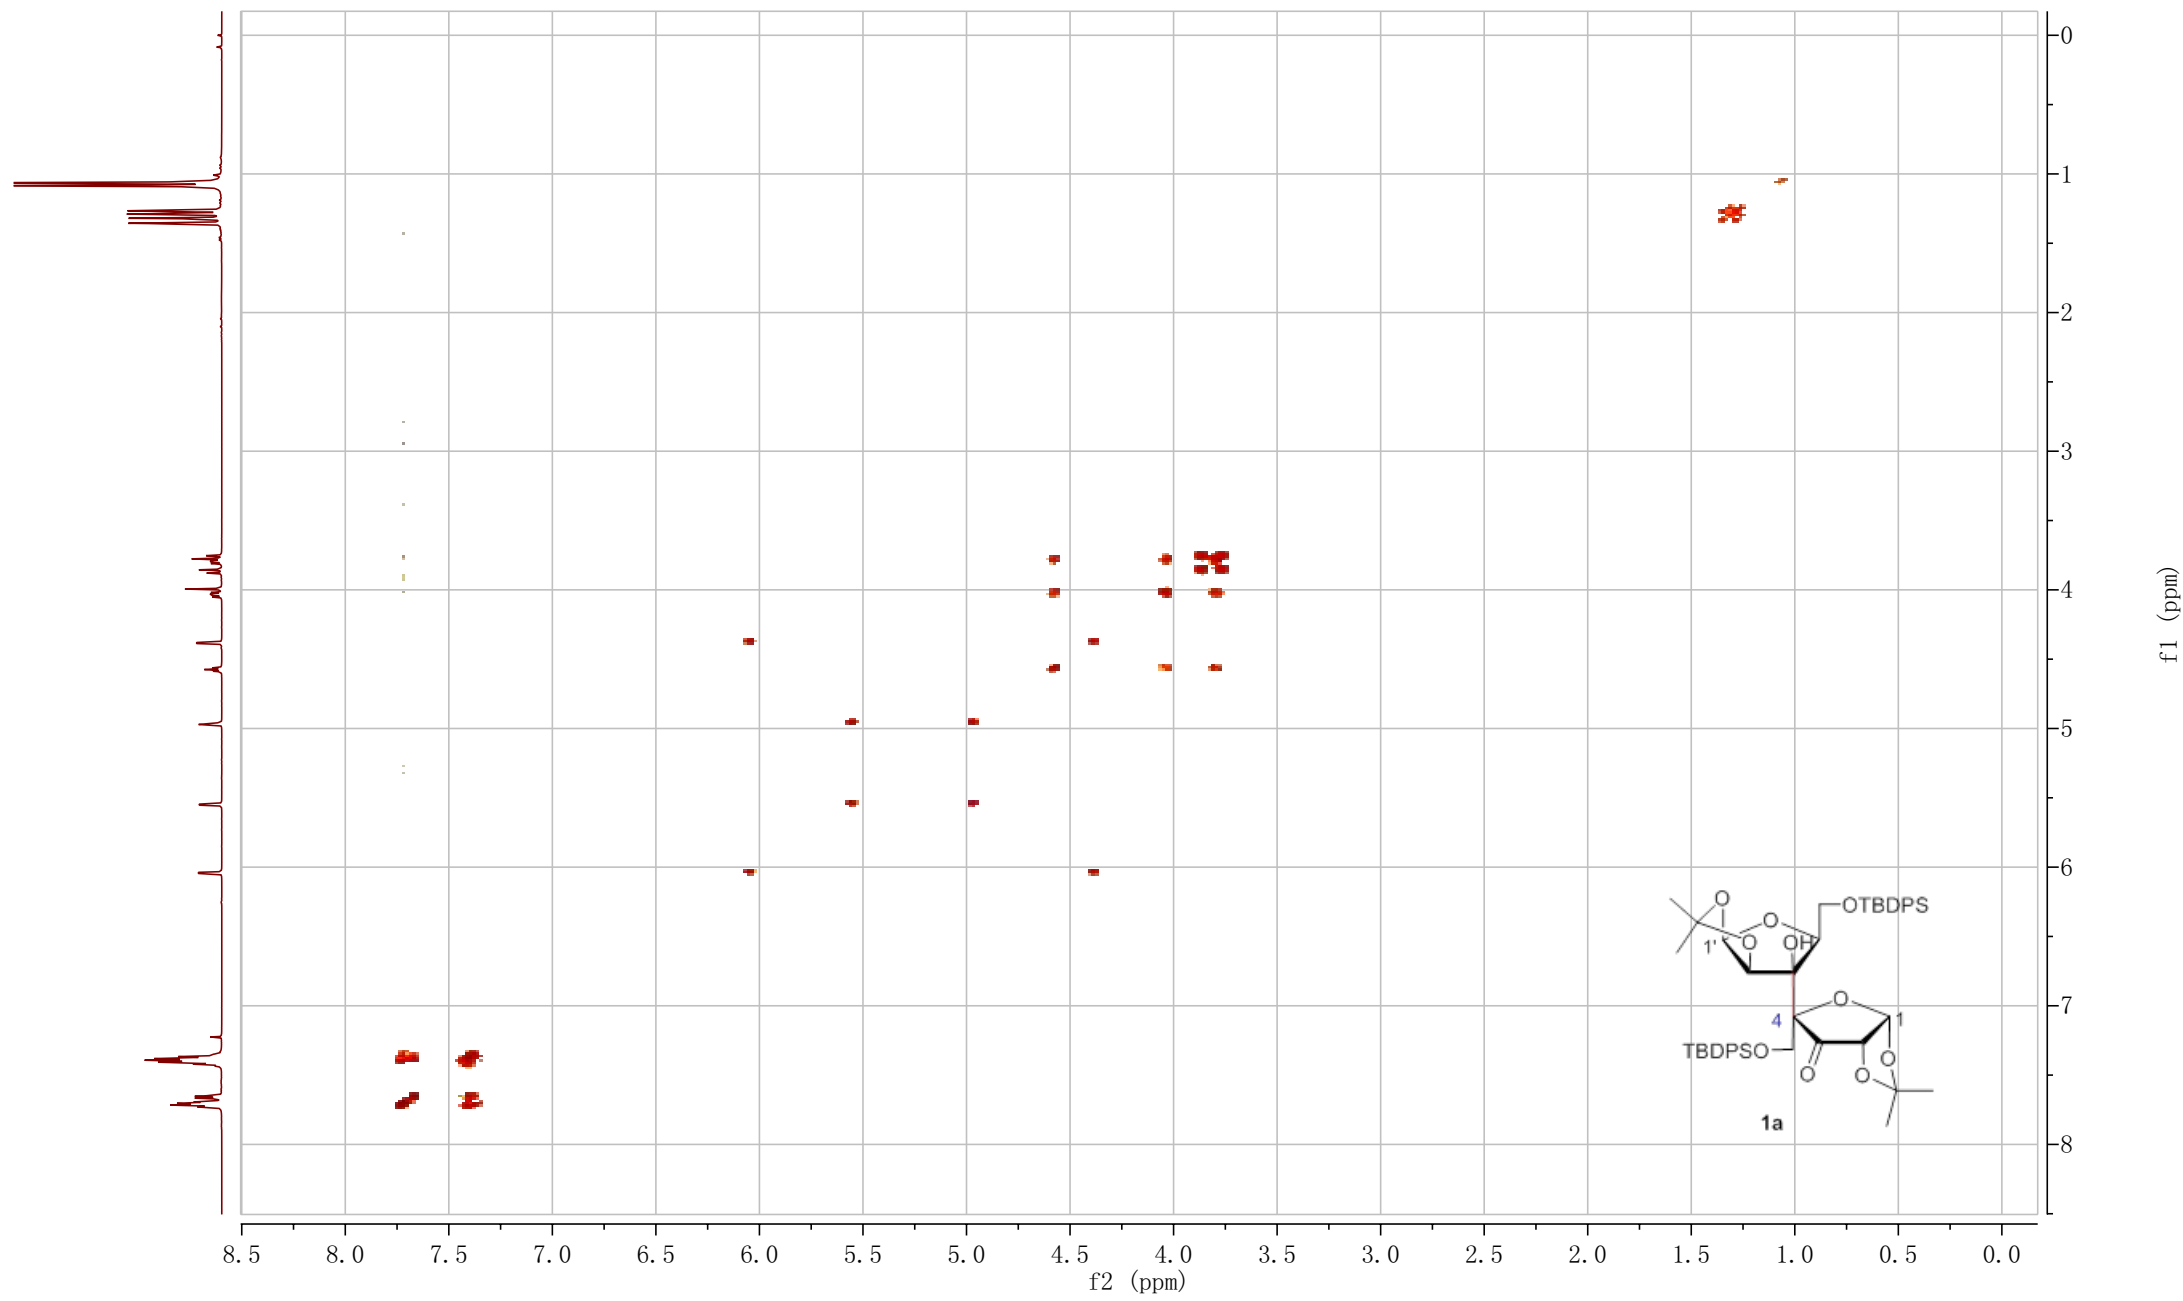

S36

HSQC

d-chloroform

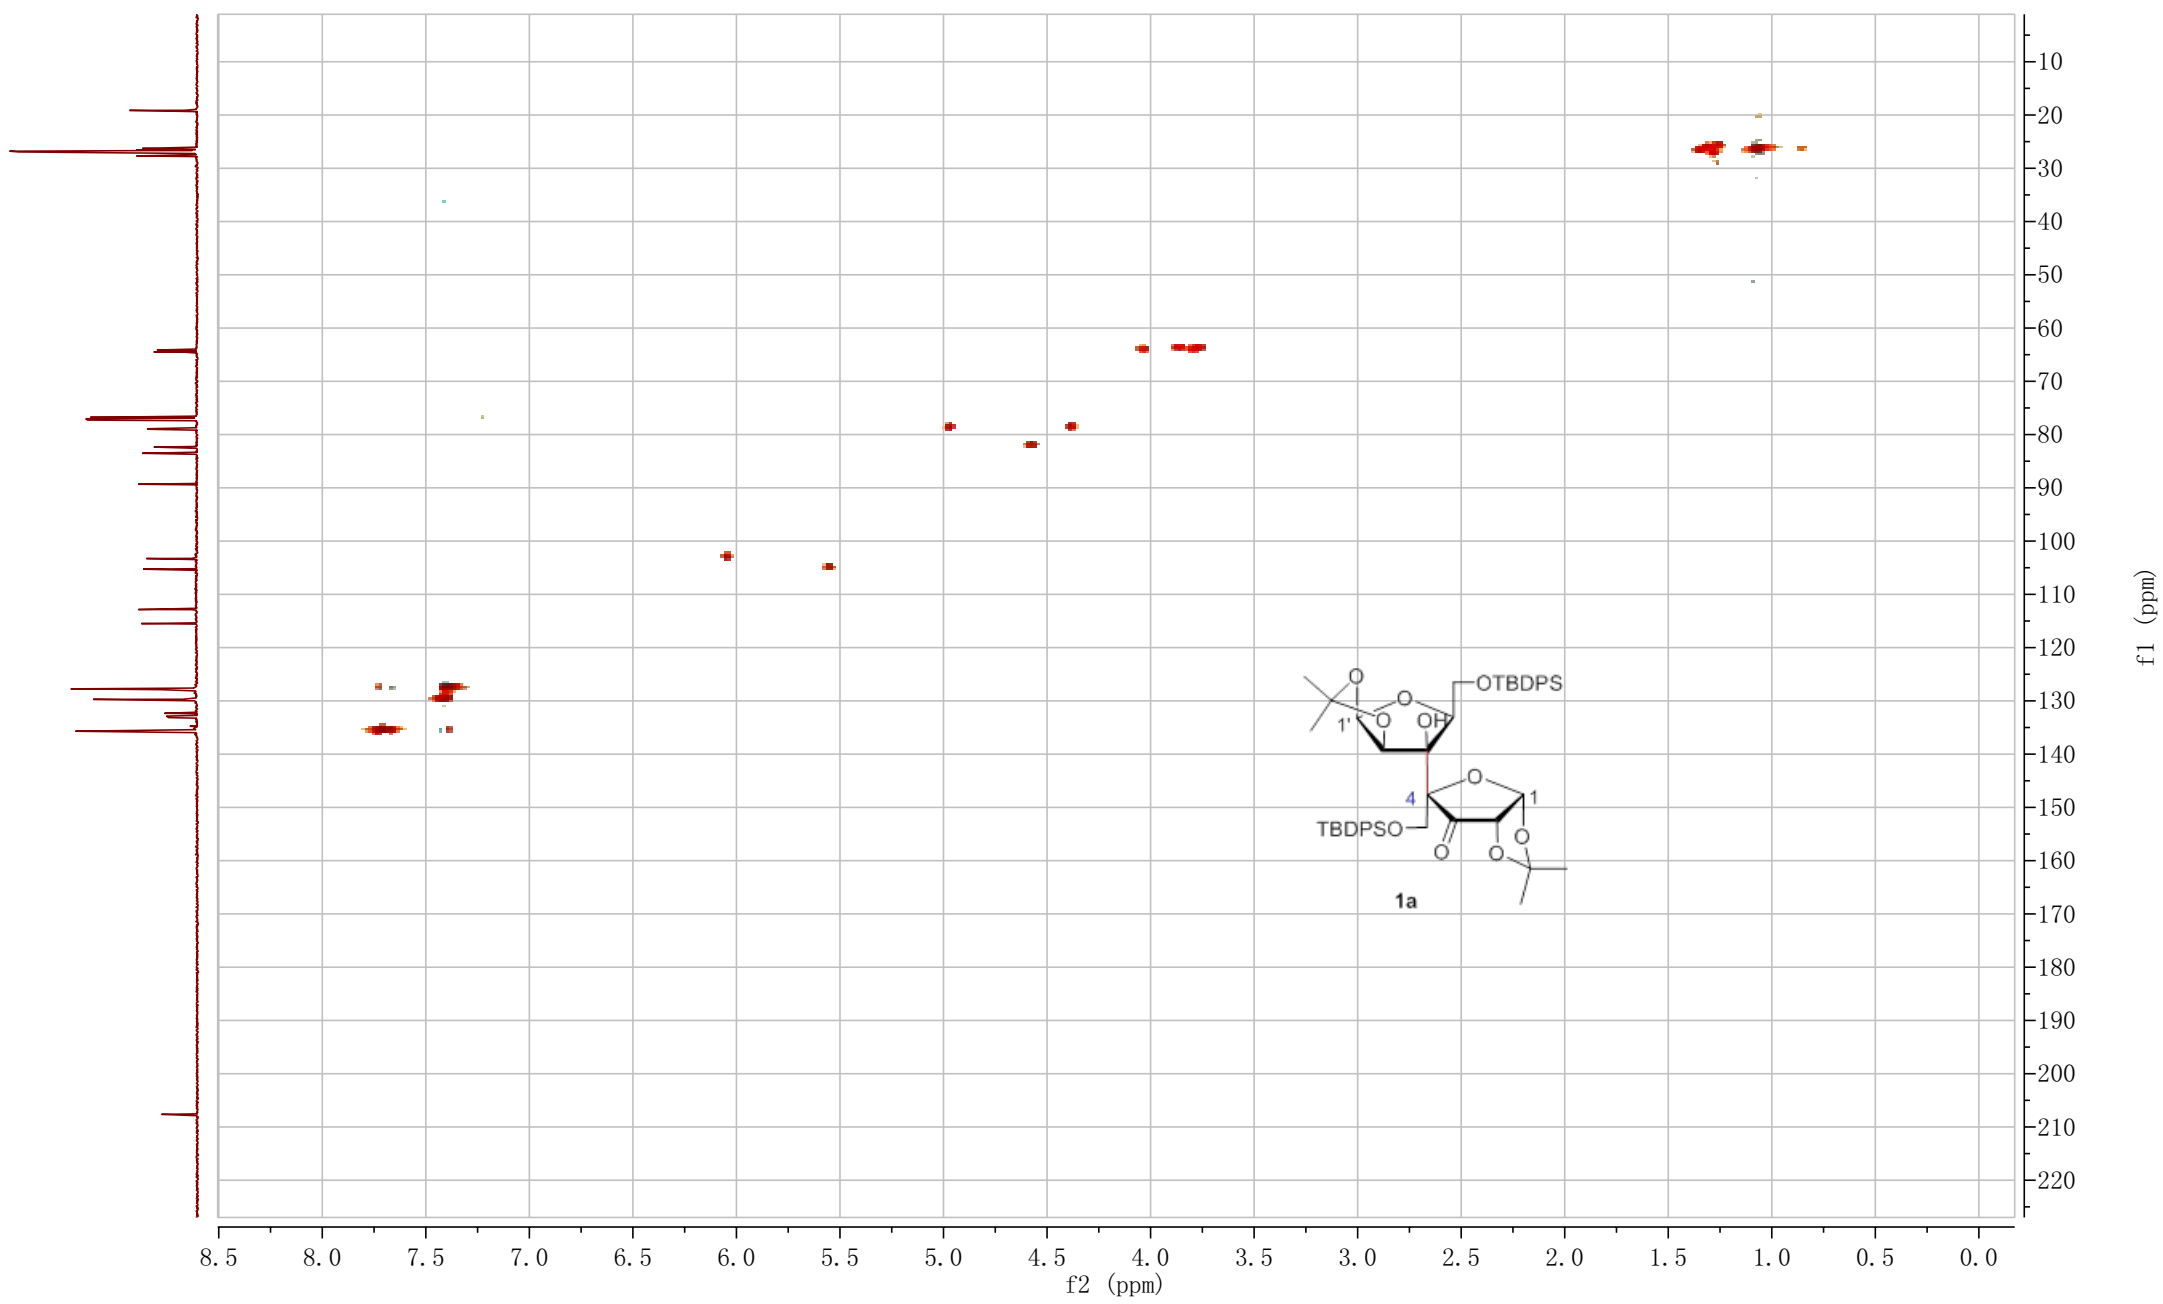

S37

HMBC

d-chloroform

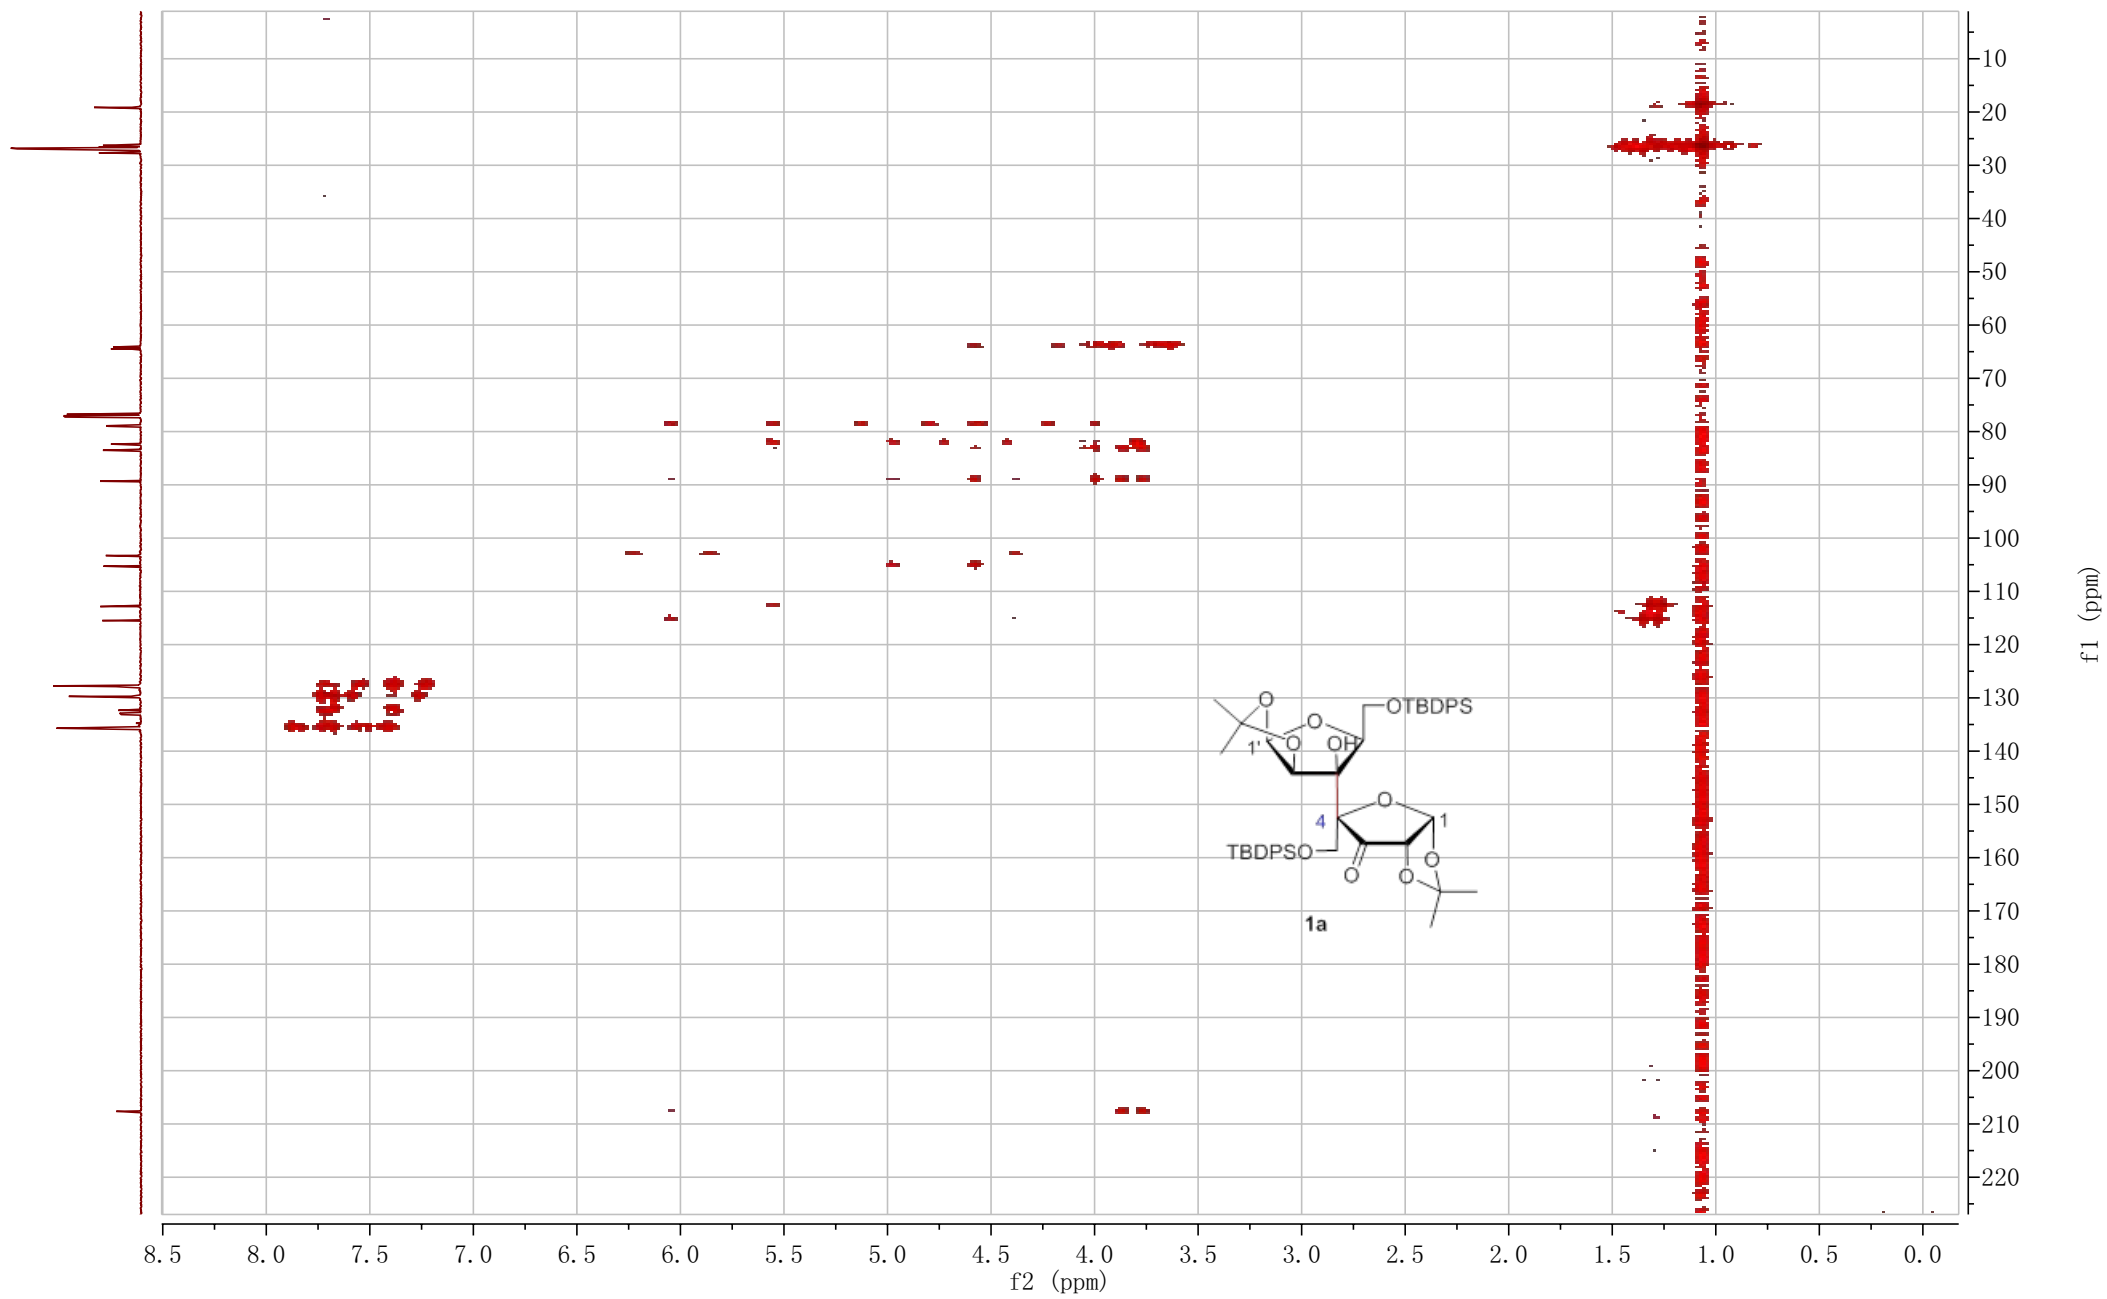

f1 (ppm)

S38

NOESY

d-chloroform

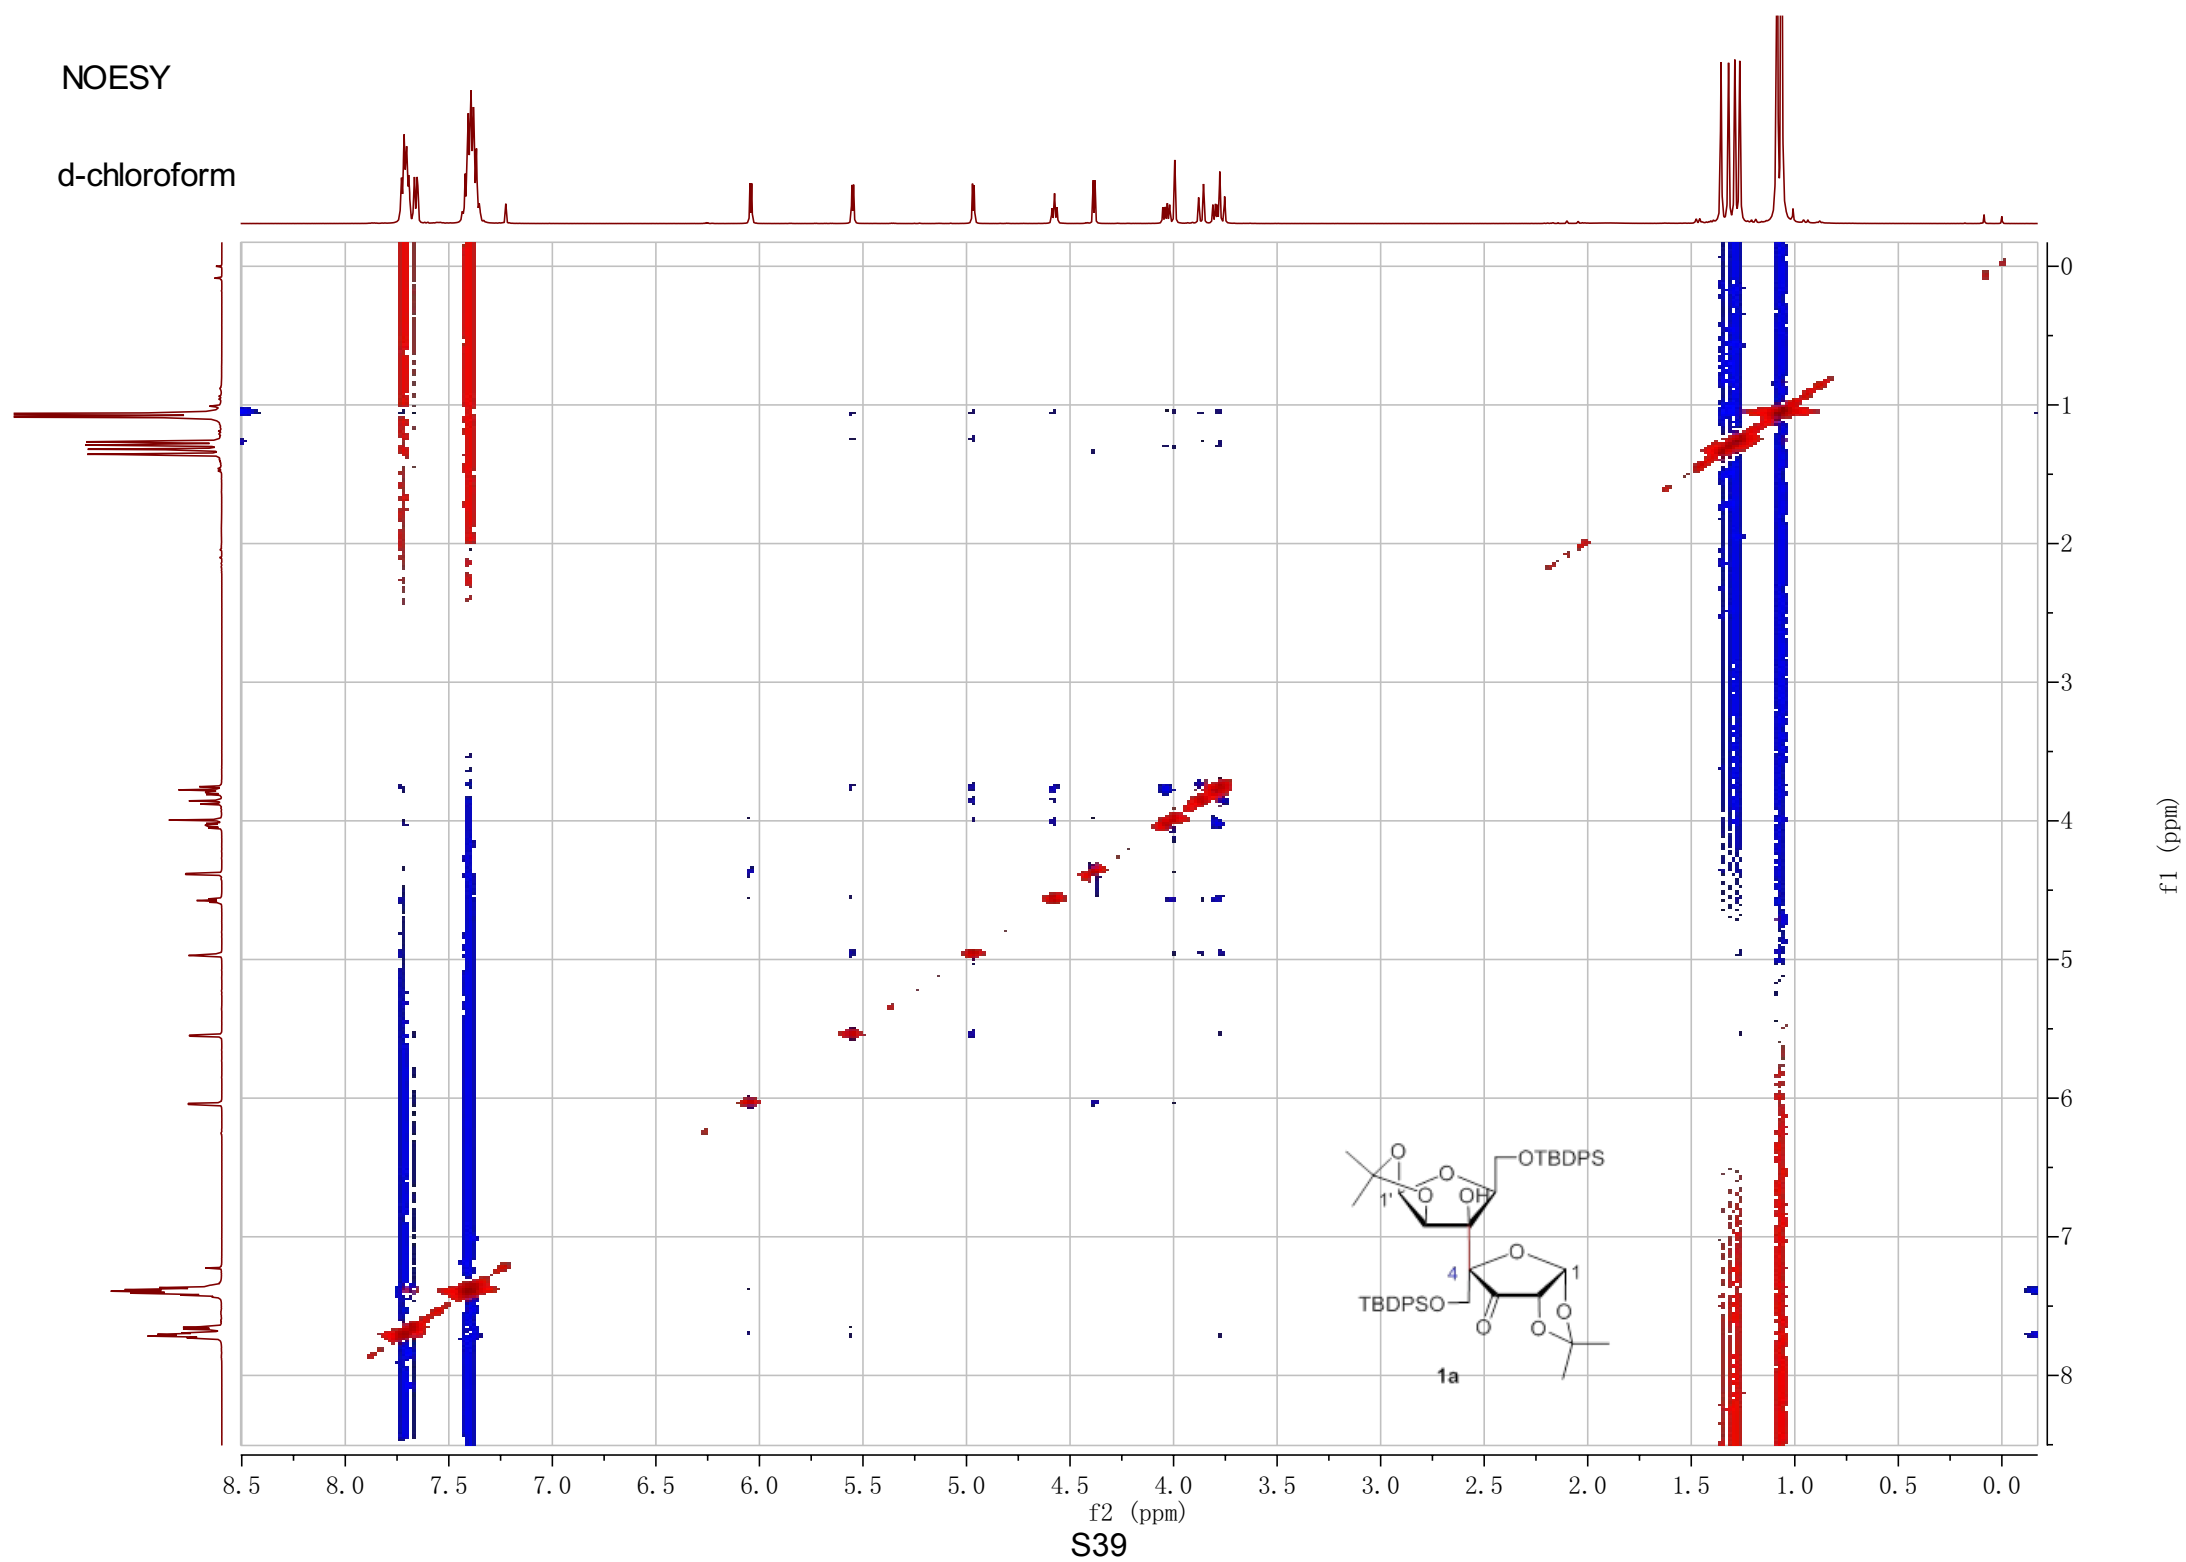

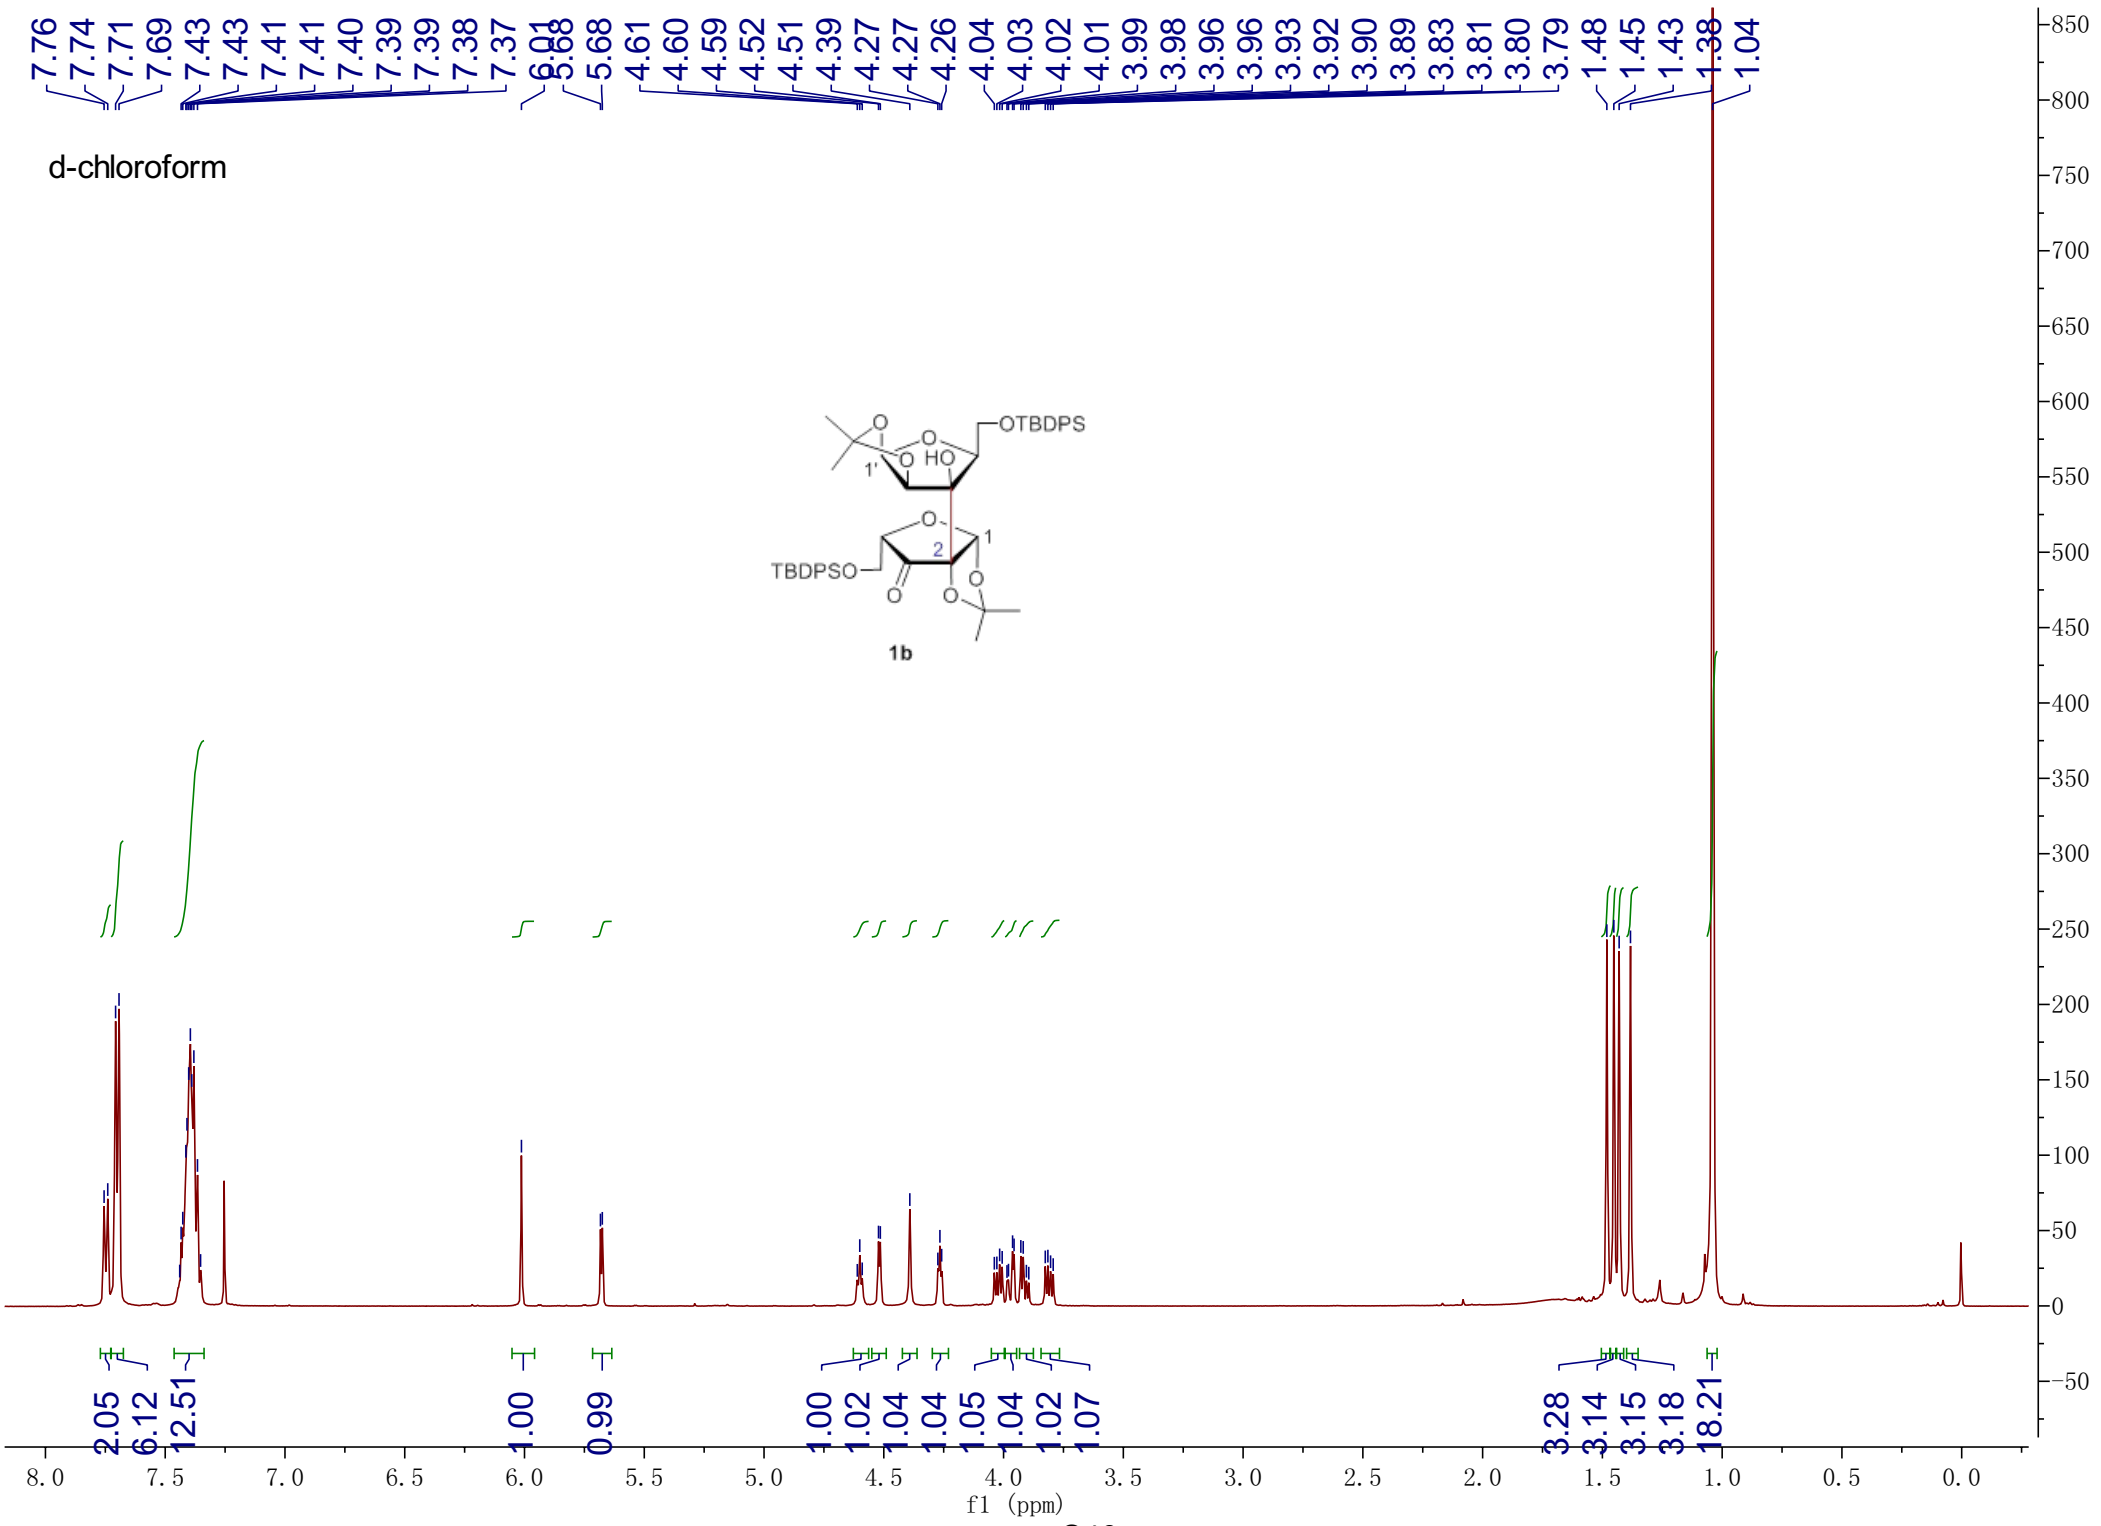



d-chloroform  
—208.4

135.8  
135.7  
135.6  
135.6  
133.0  
132.8  
132.7  
132.5  
129.8  
129.8  
129.7  
129.7  
127.8  
127.7  
127.7  
127.7  
115.4  
114.0  
104.8  
104.1

86.5  
83.0  
81.3  
80.4  
79.9  
64.1  
62.5

28.6  
27.4  
27.2  
26.8  
26.7  
19.2  
19.1

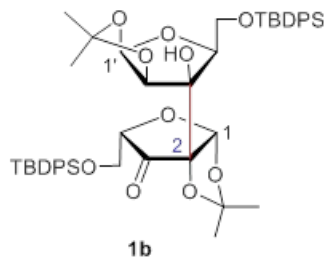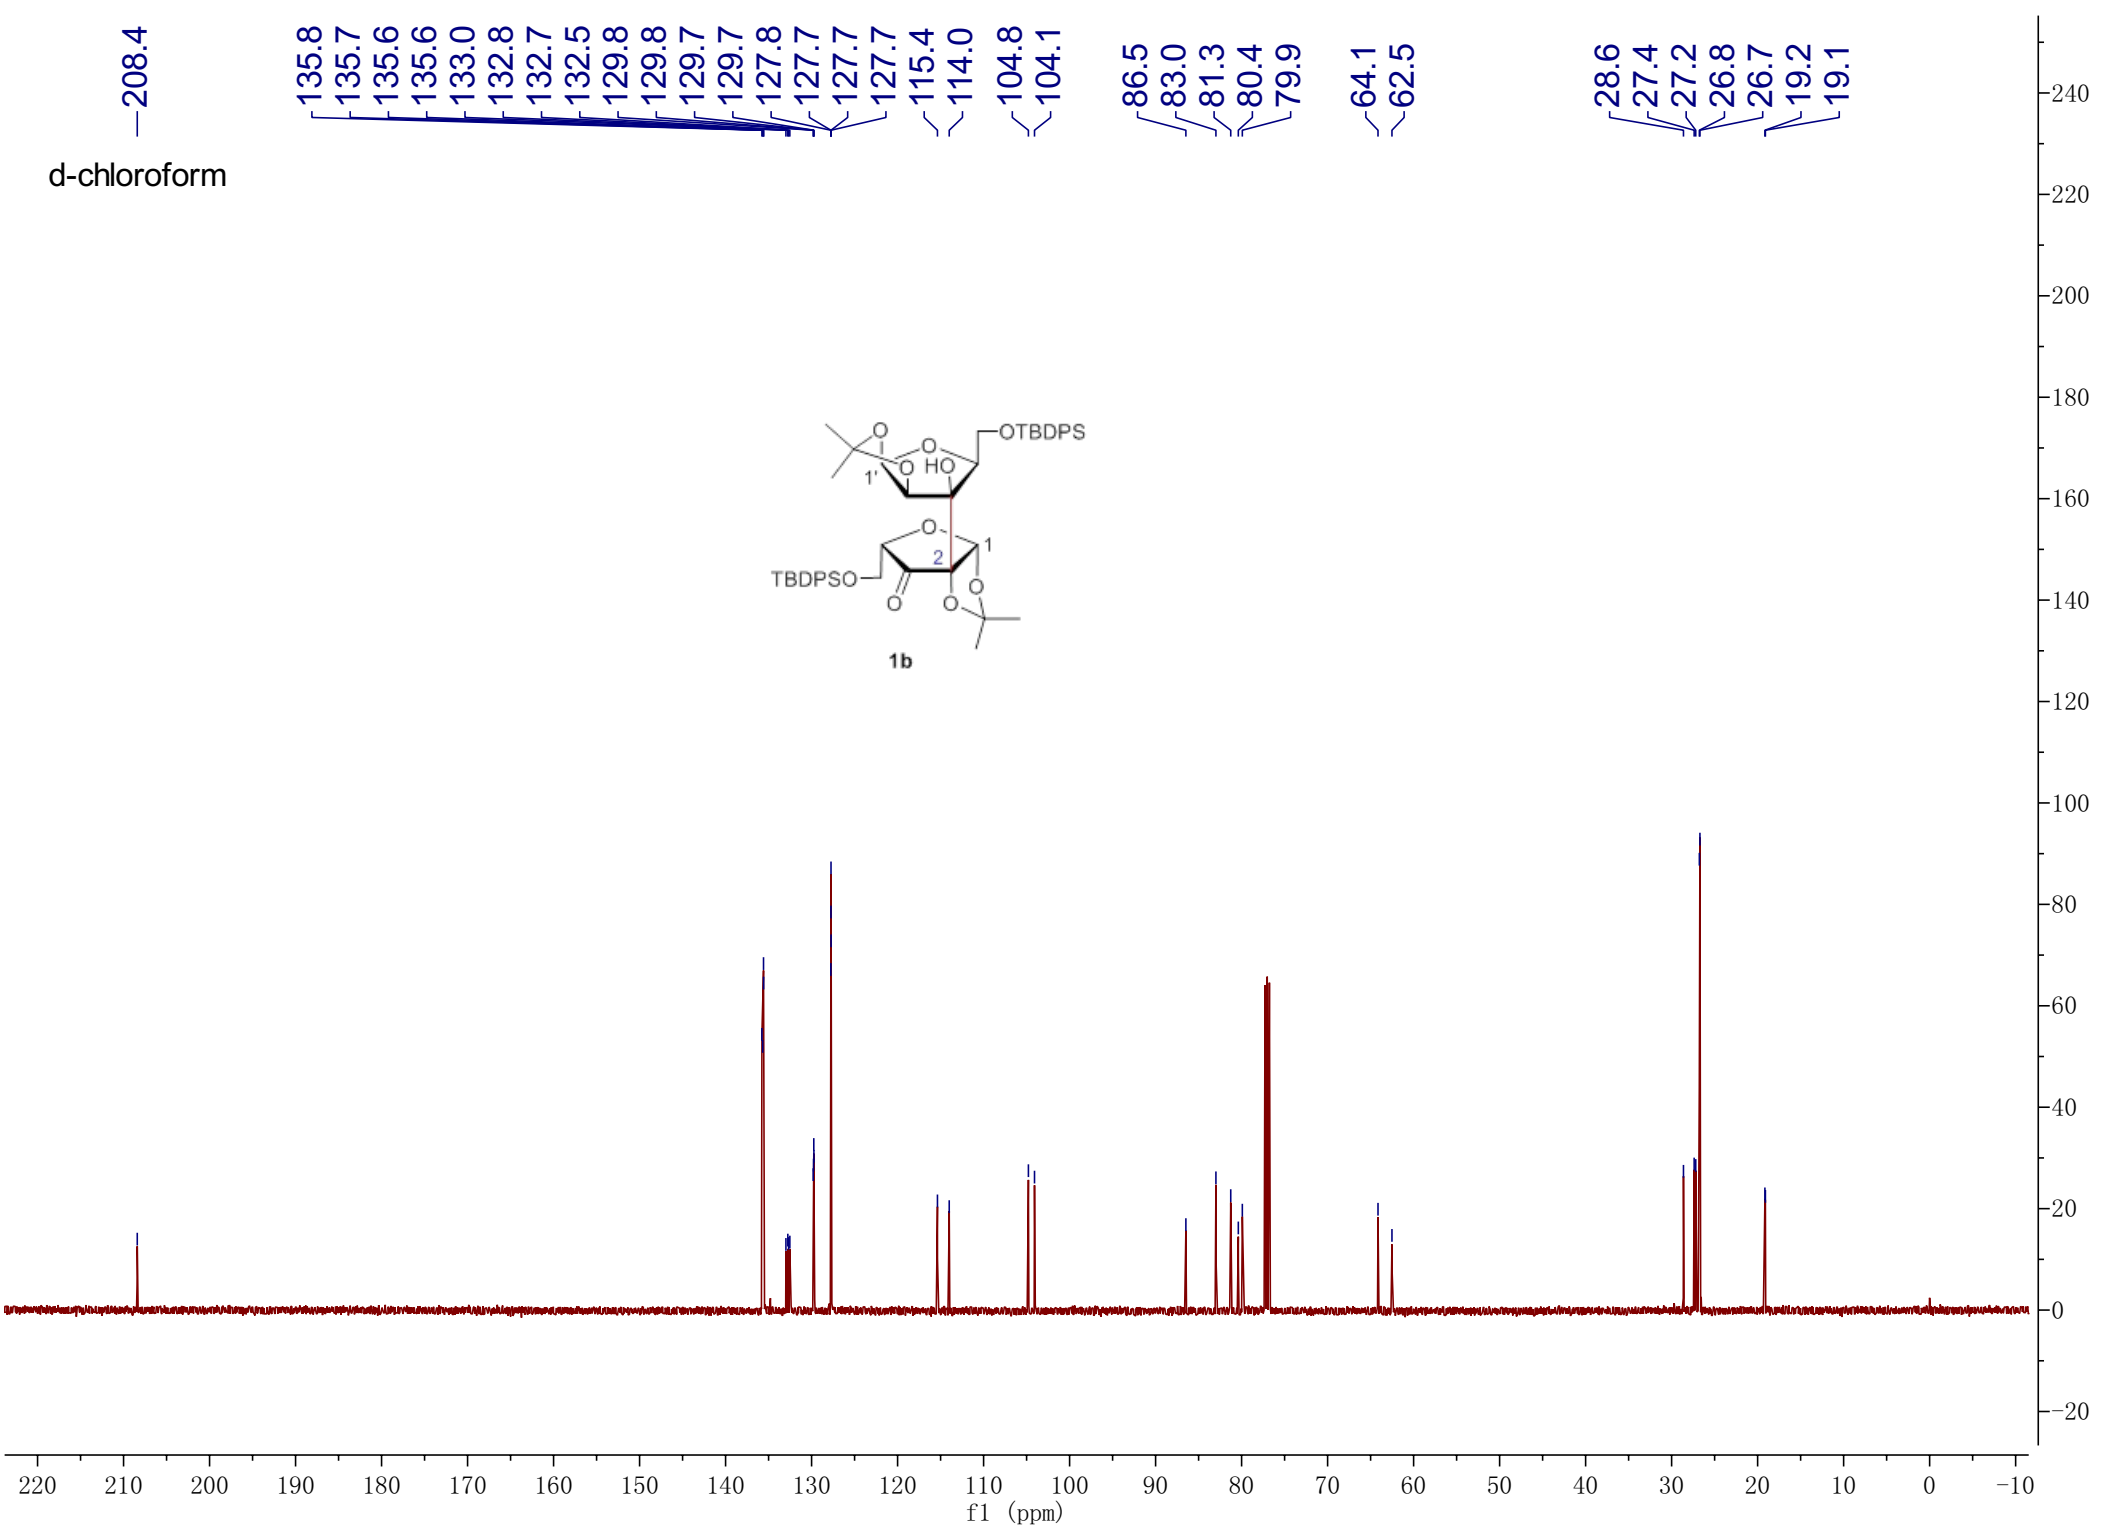

COSY

d-chloroform

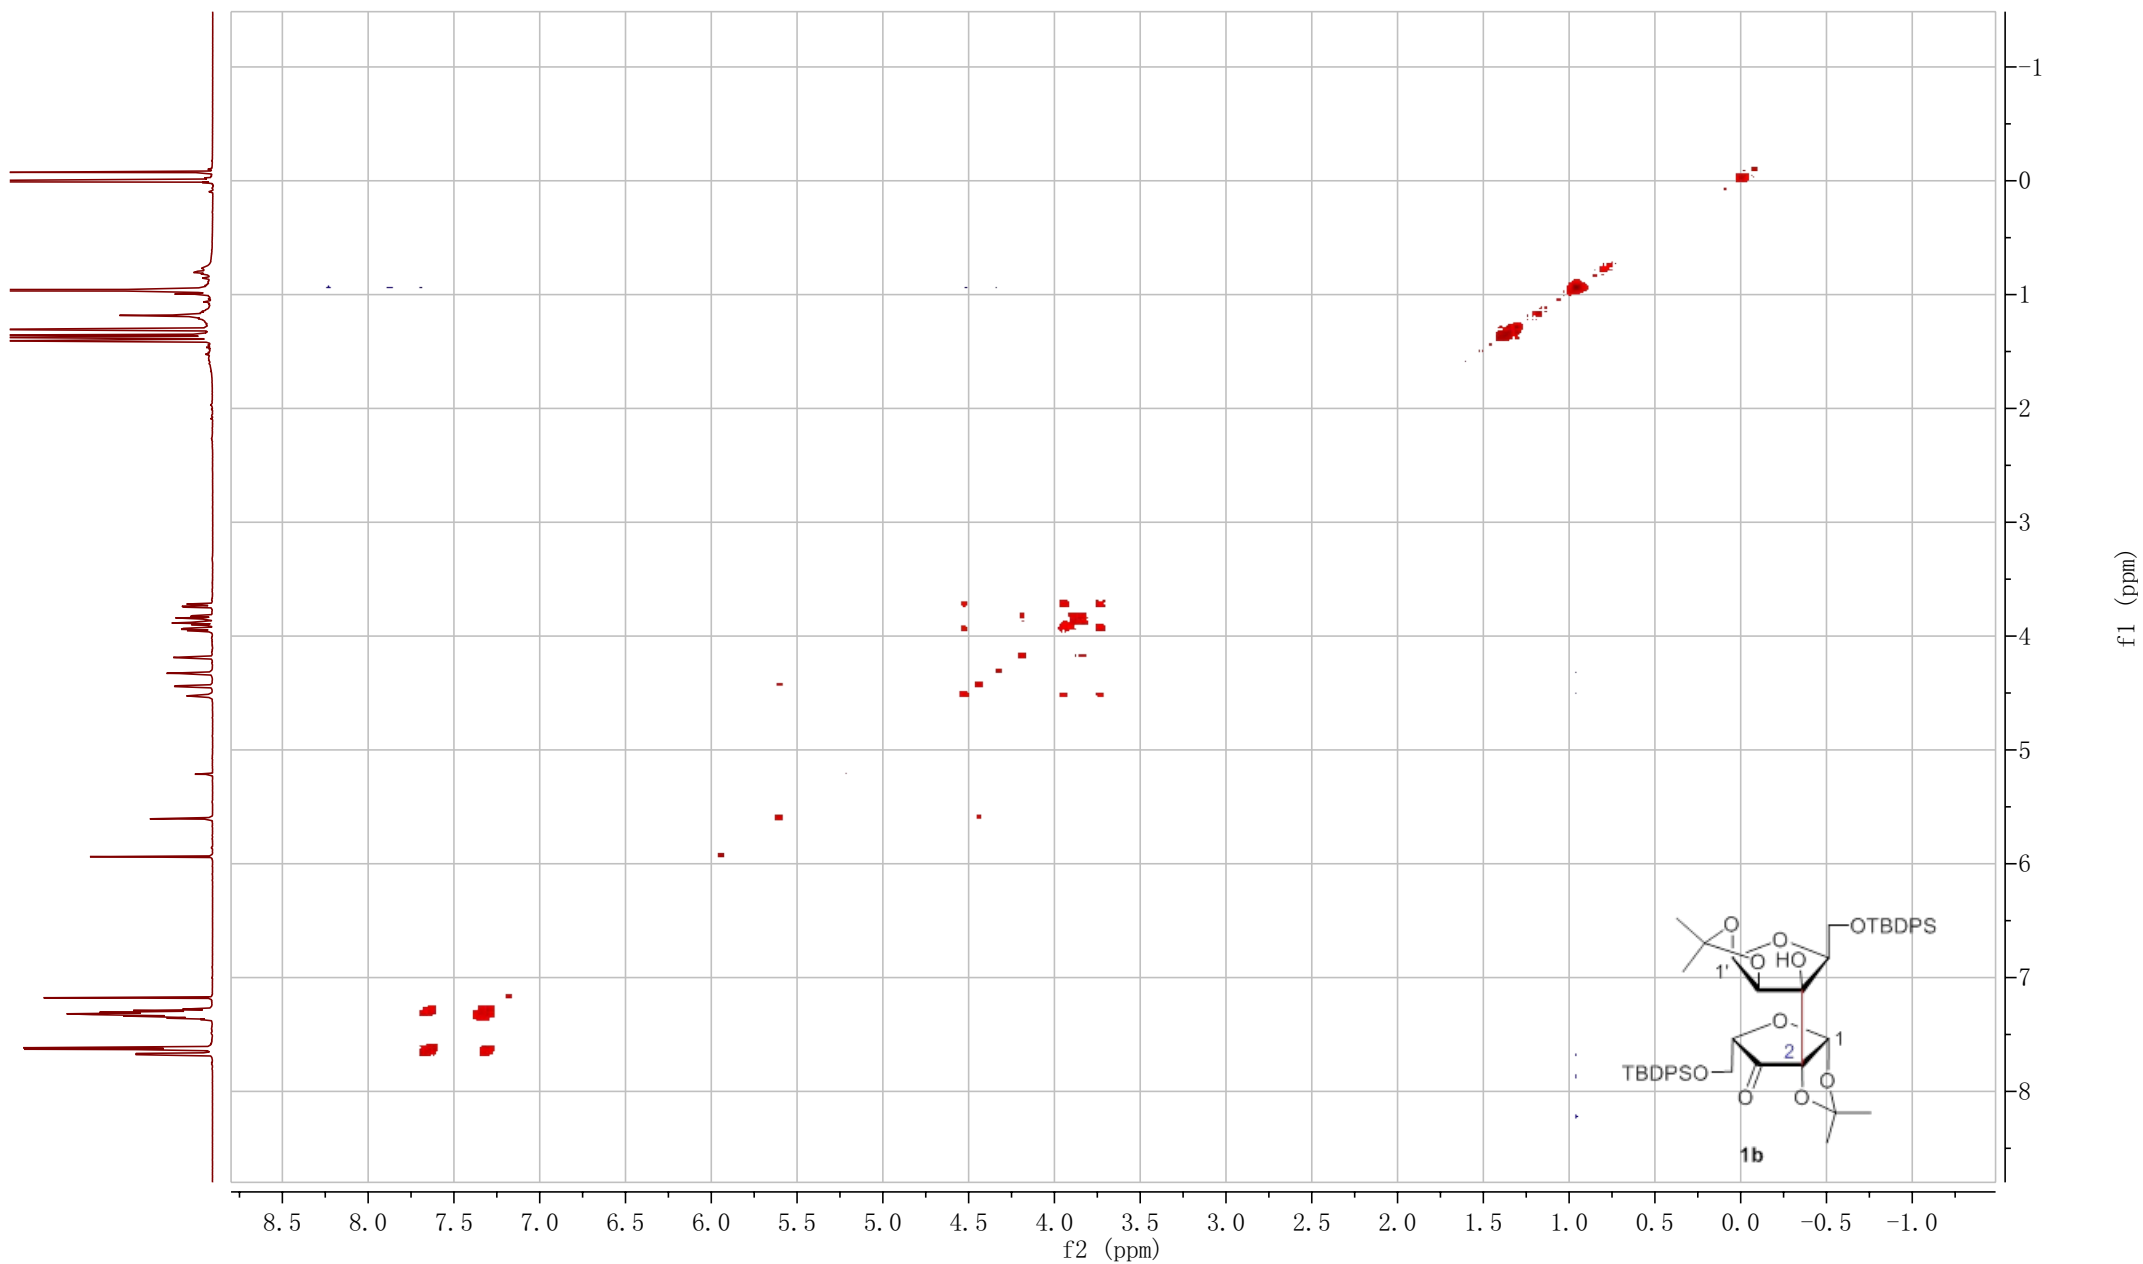

S42

HSQC

d-chloroform

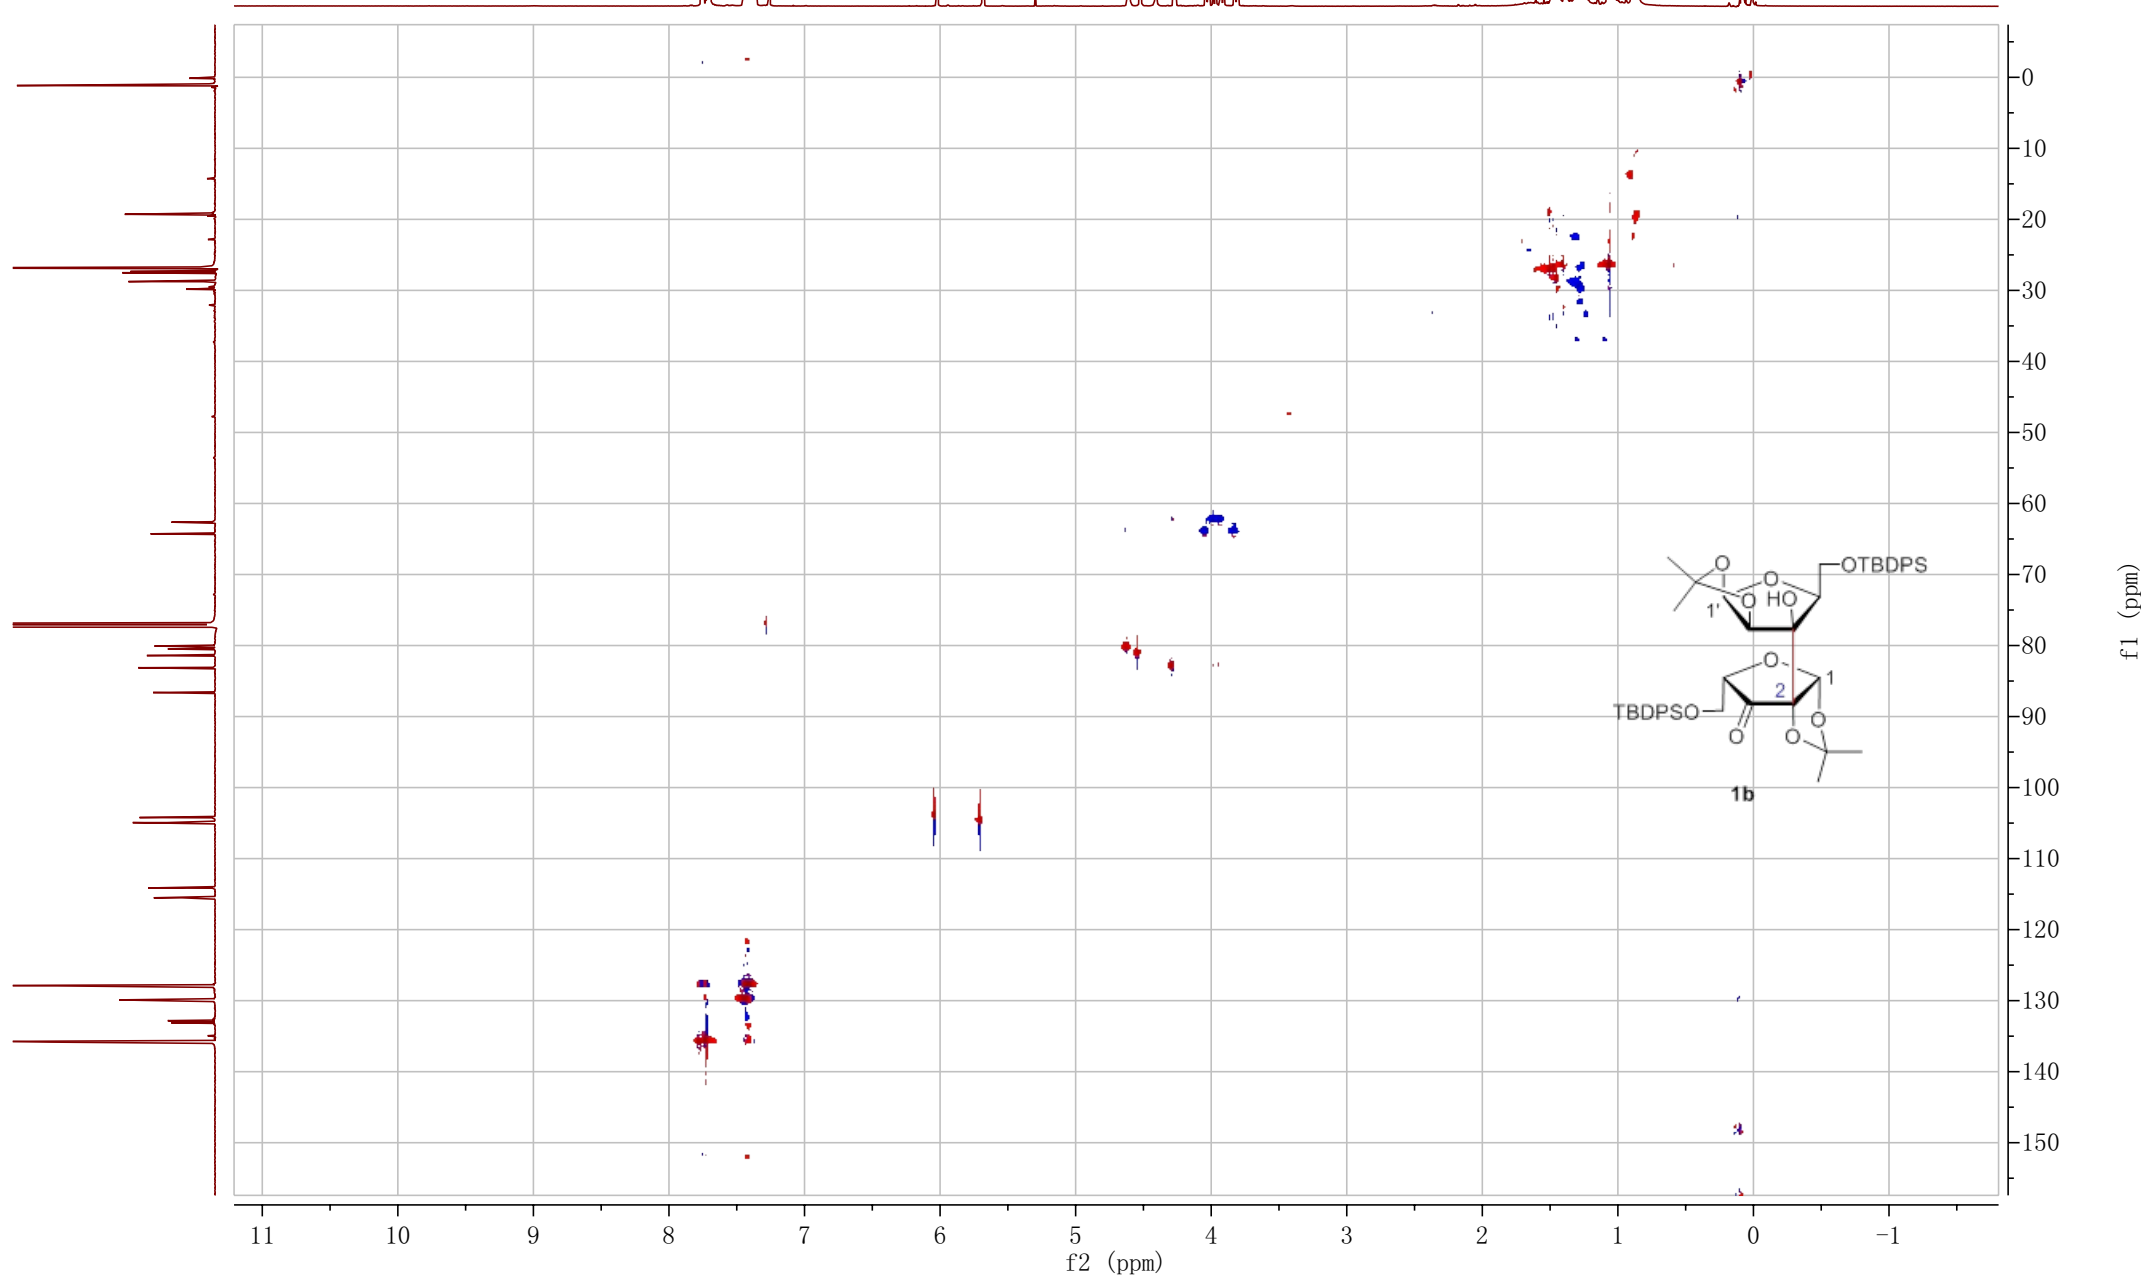

S43

HMBC

d-chloroform

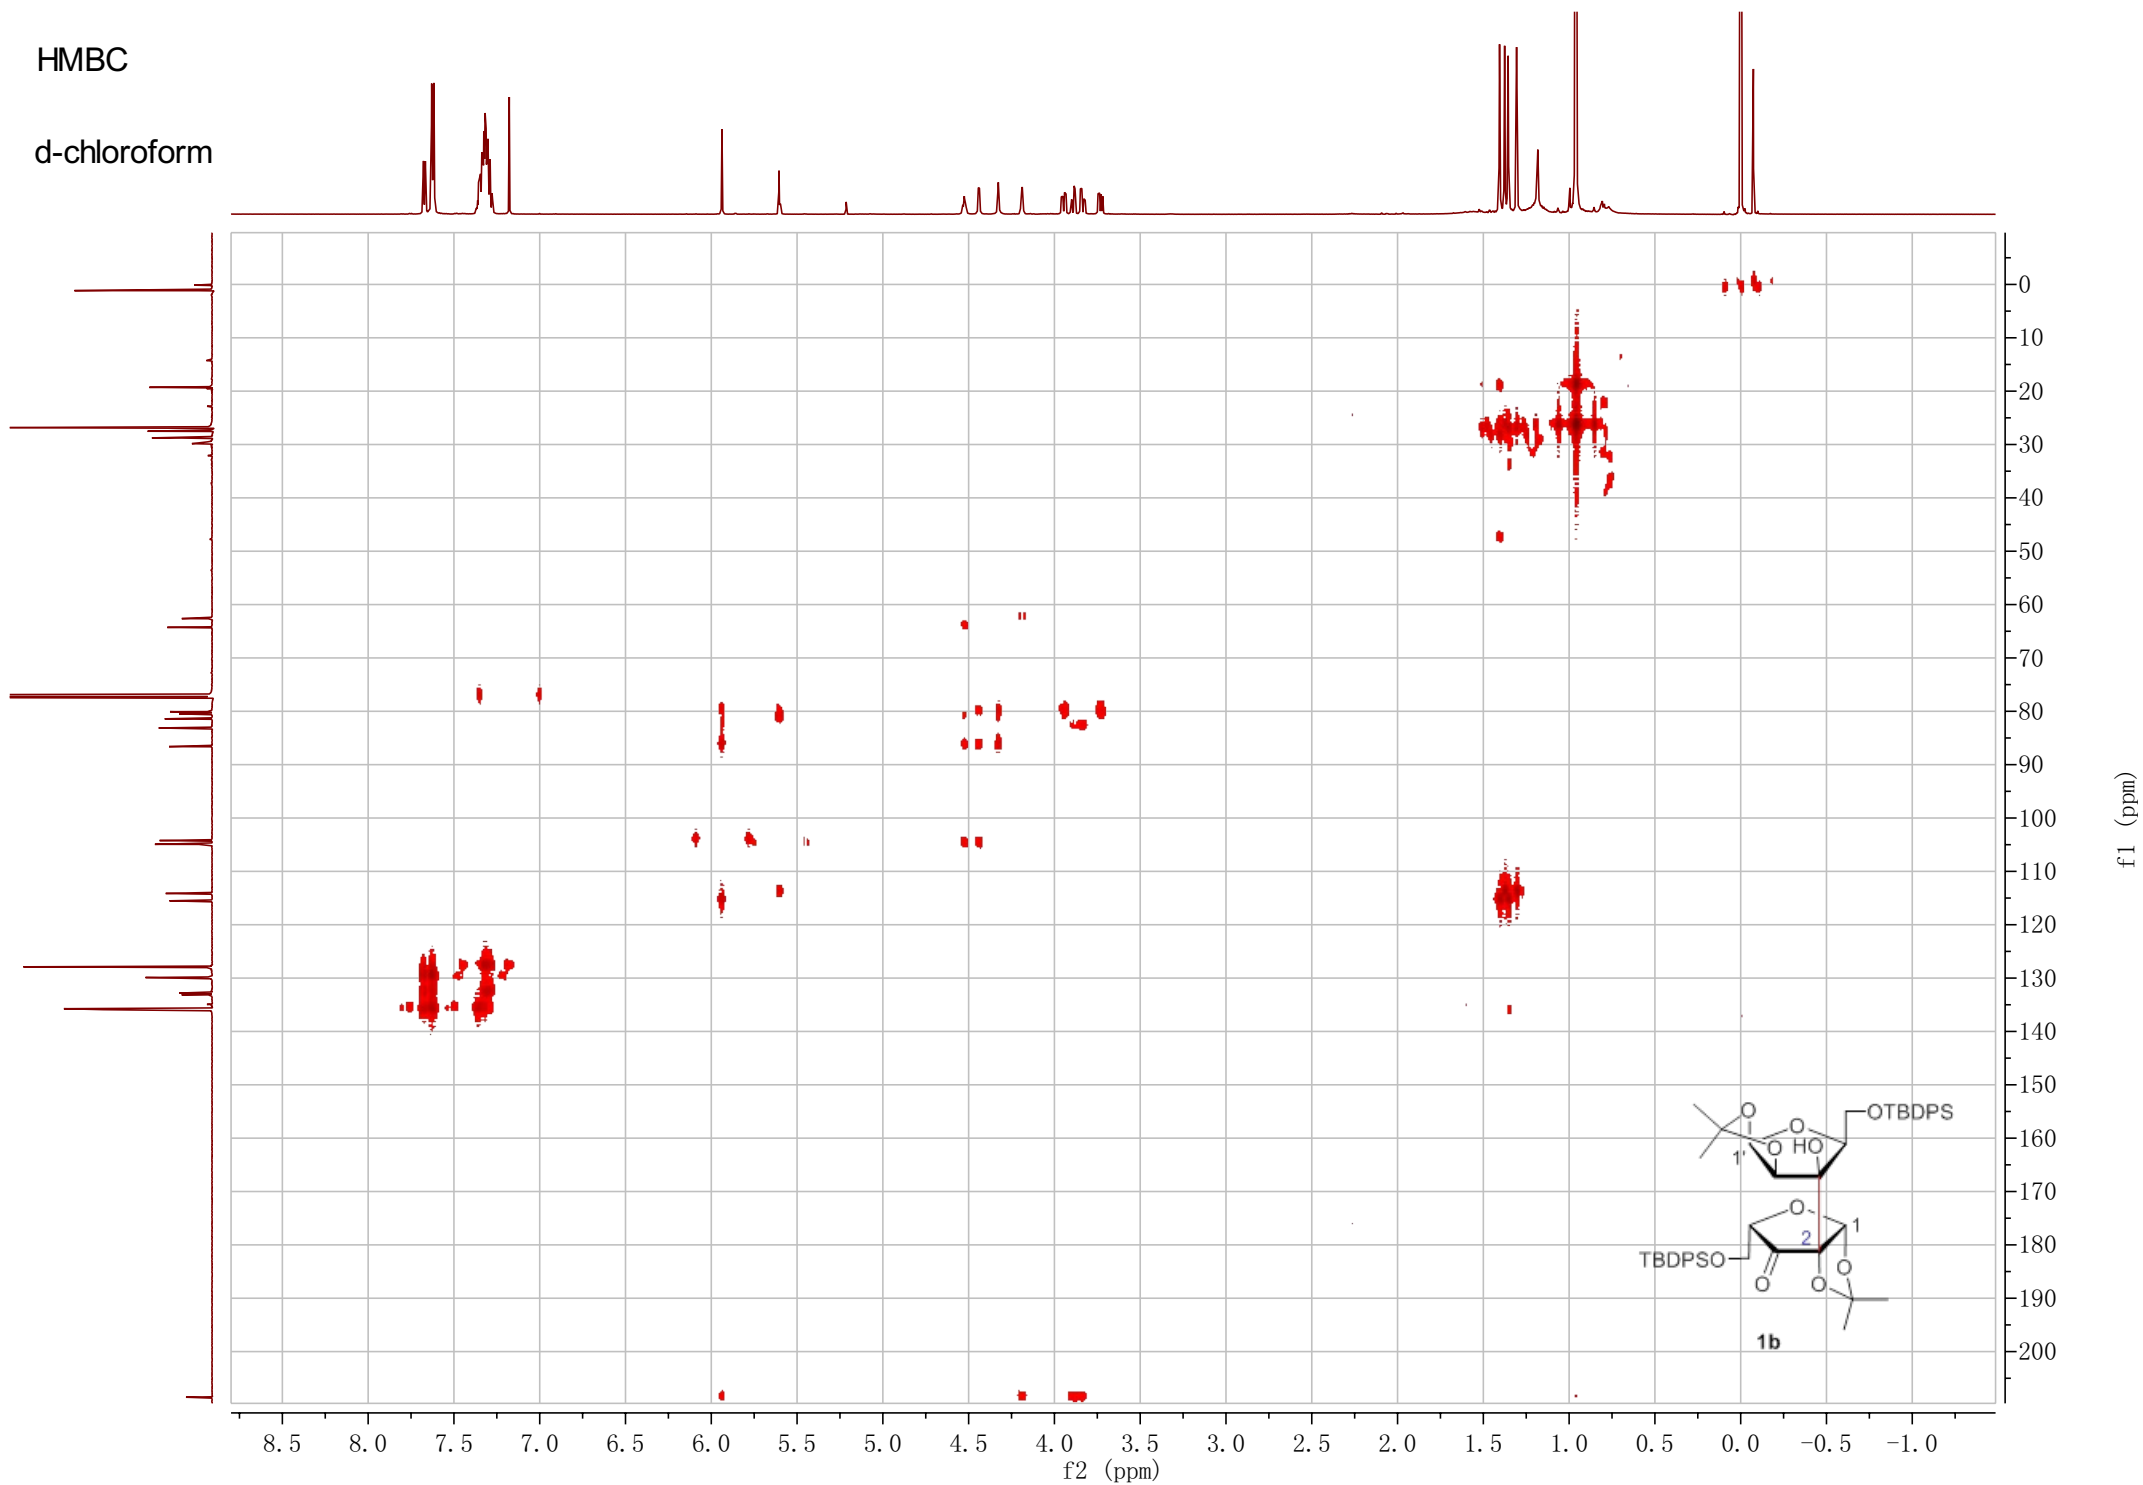

S44

NOESY

d-chloroform

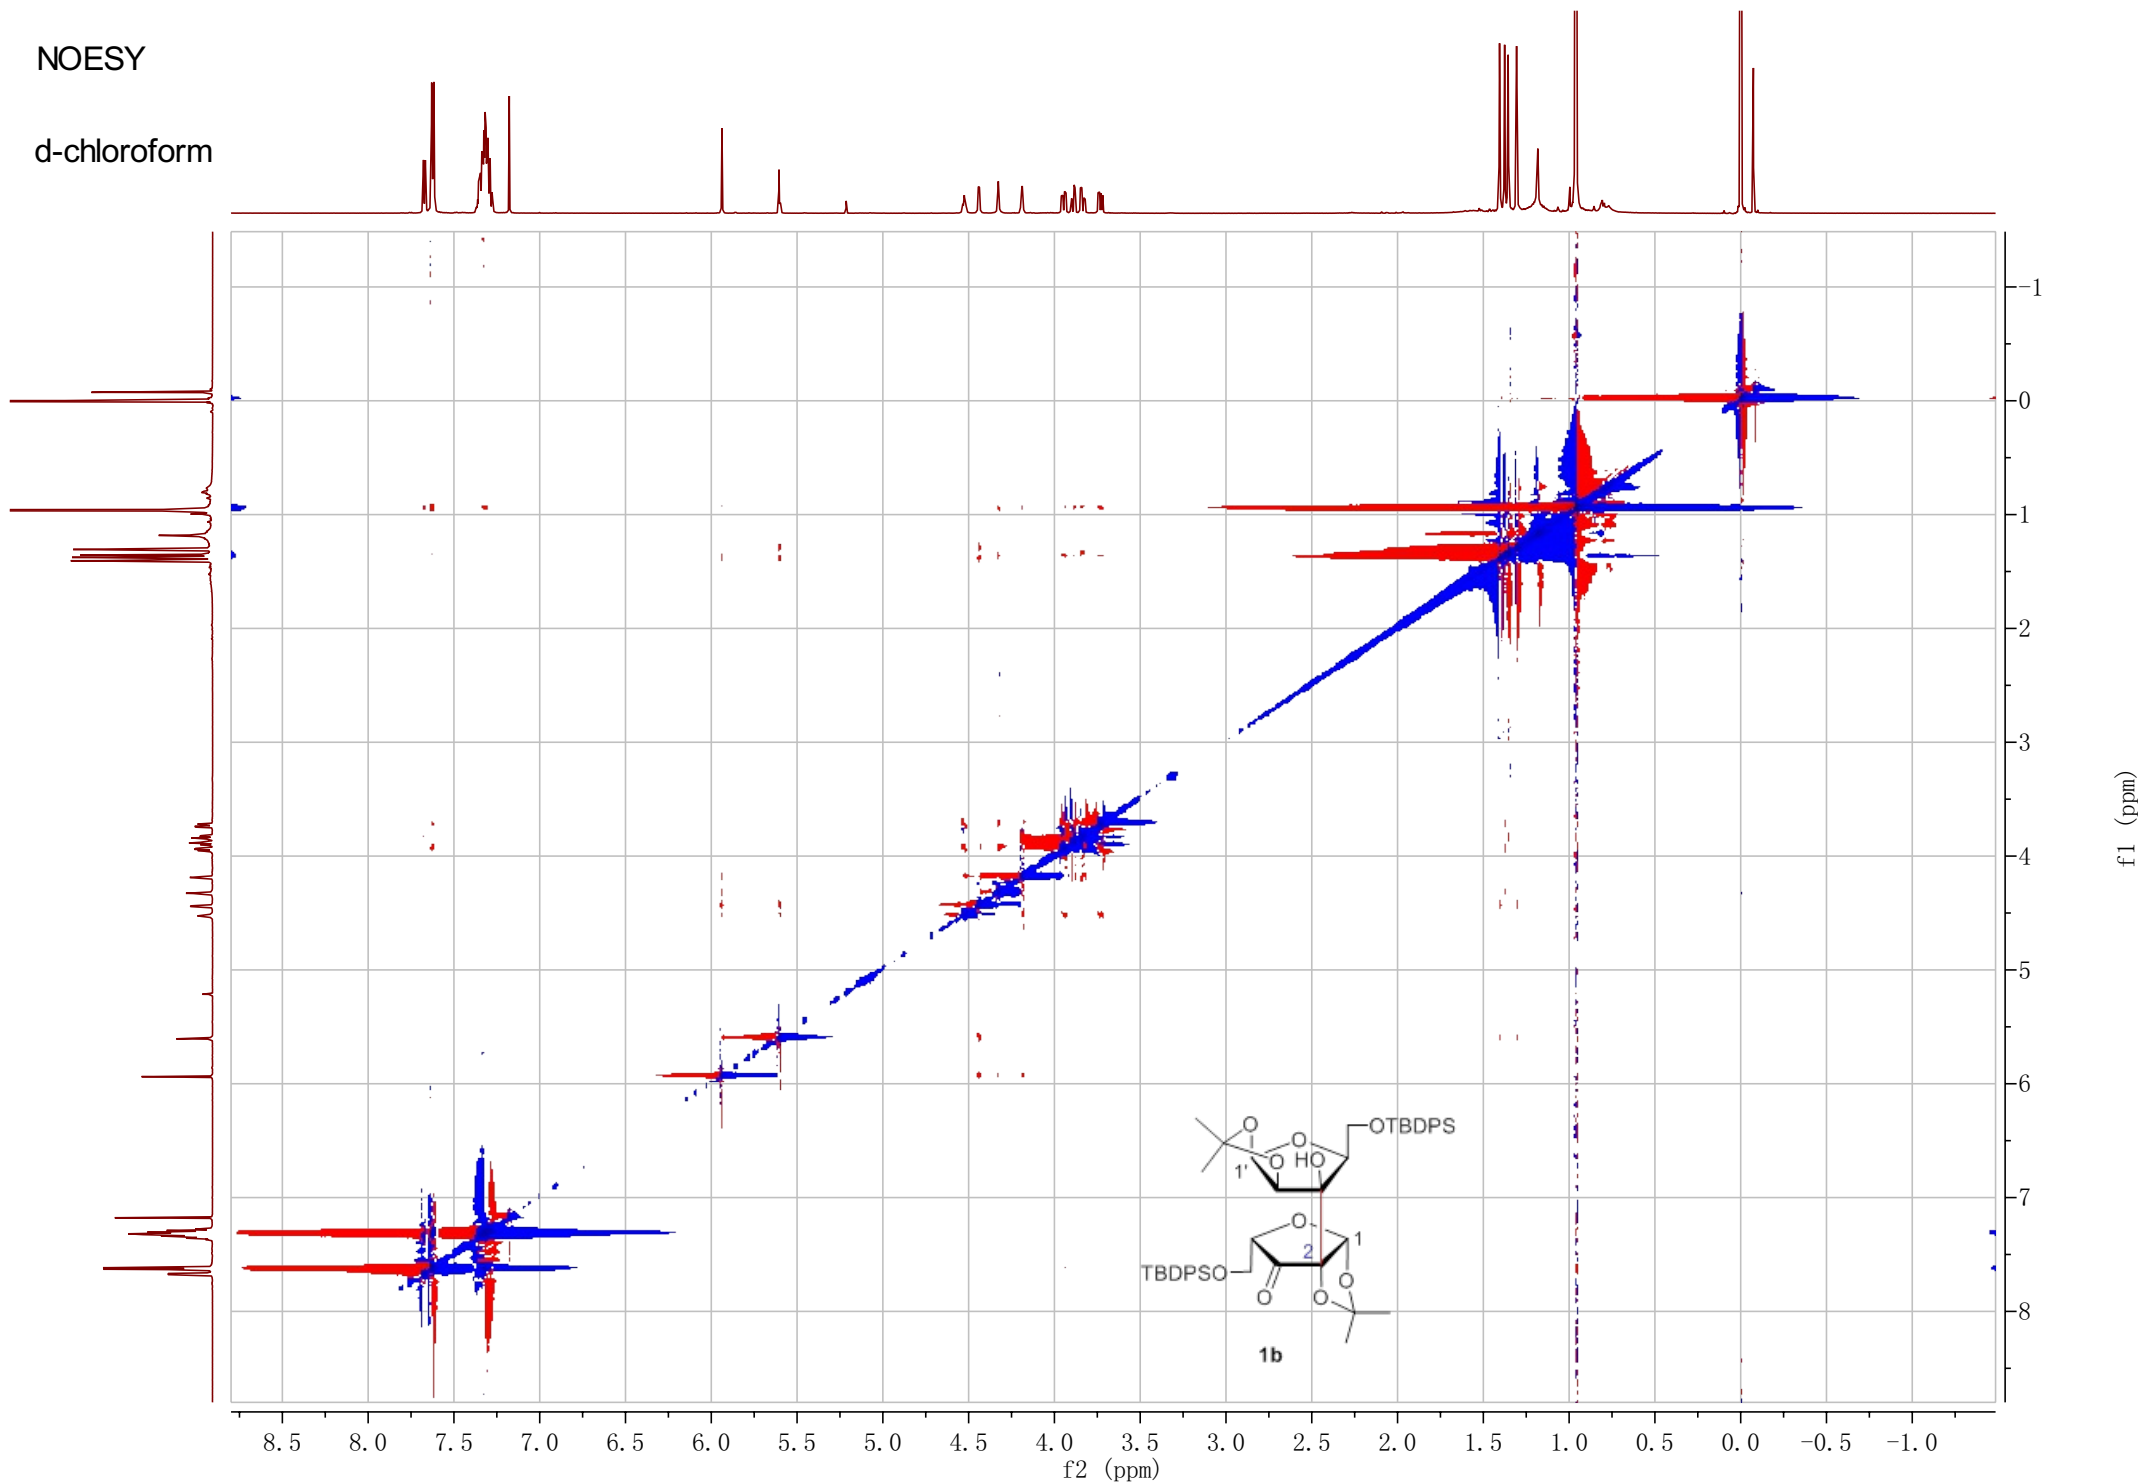

S45

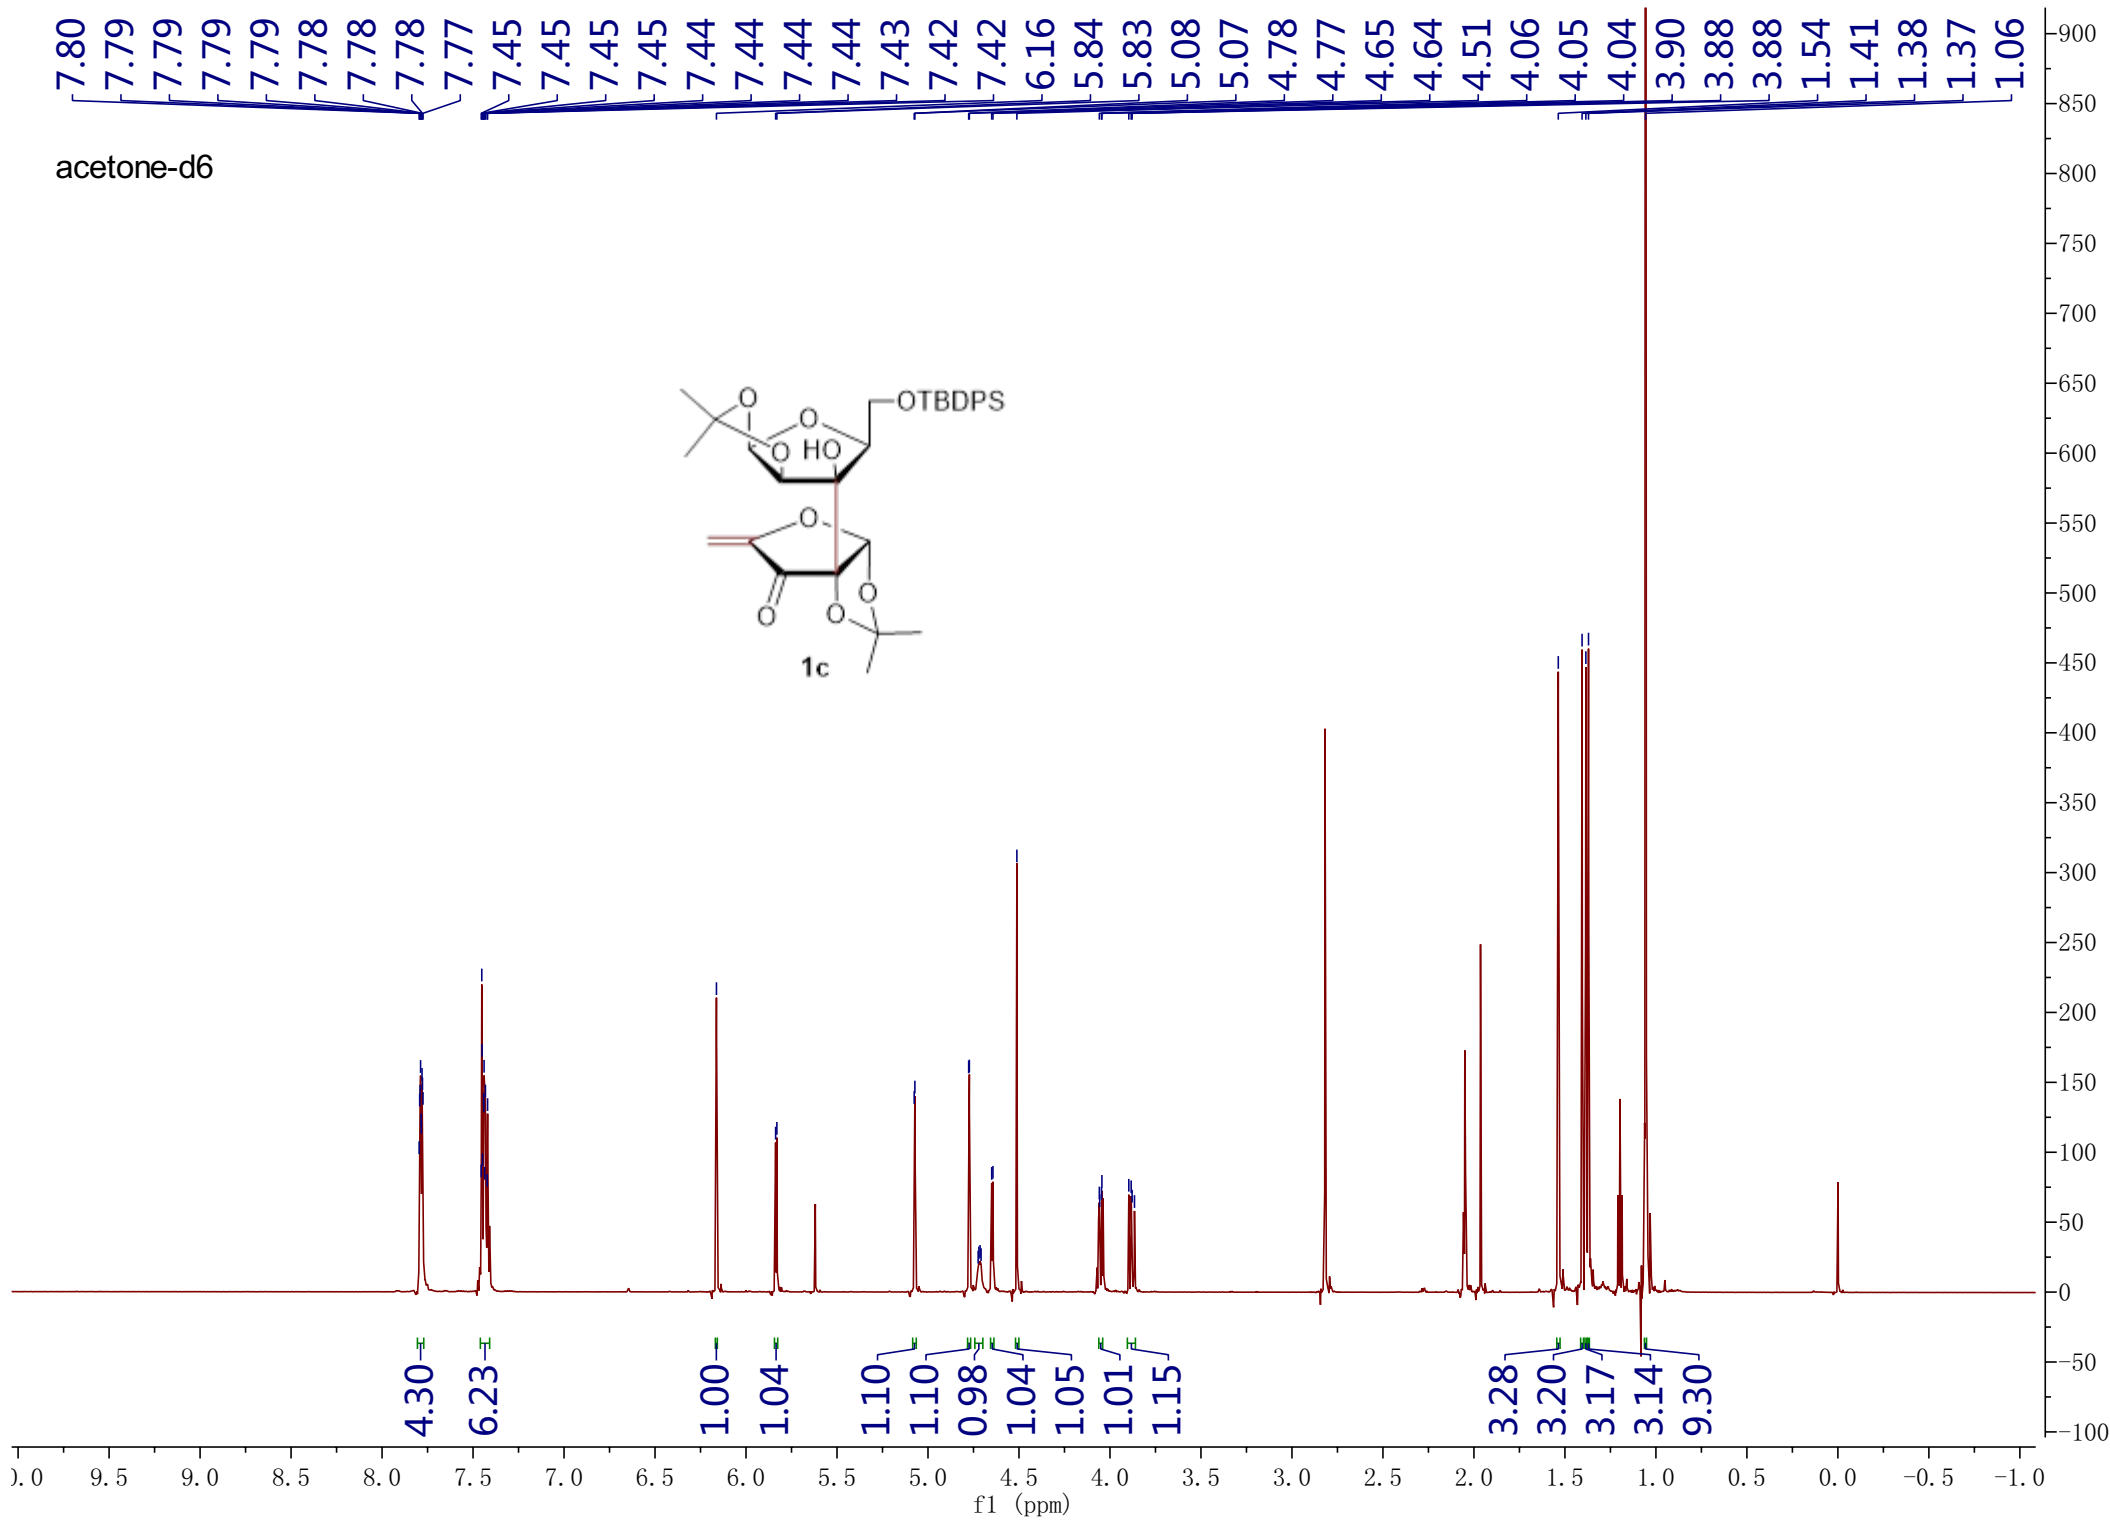

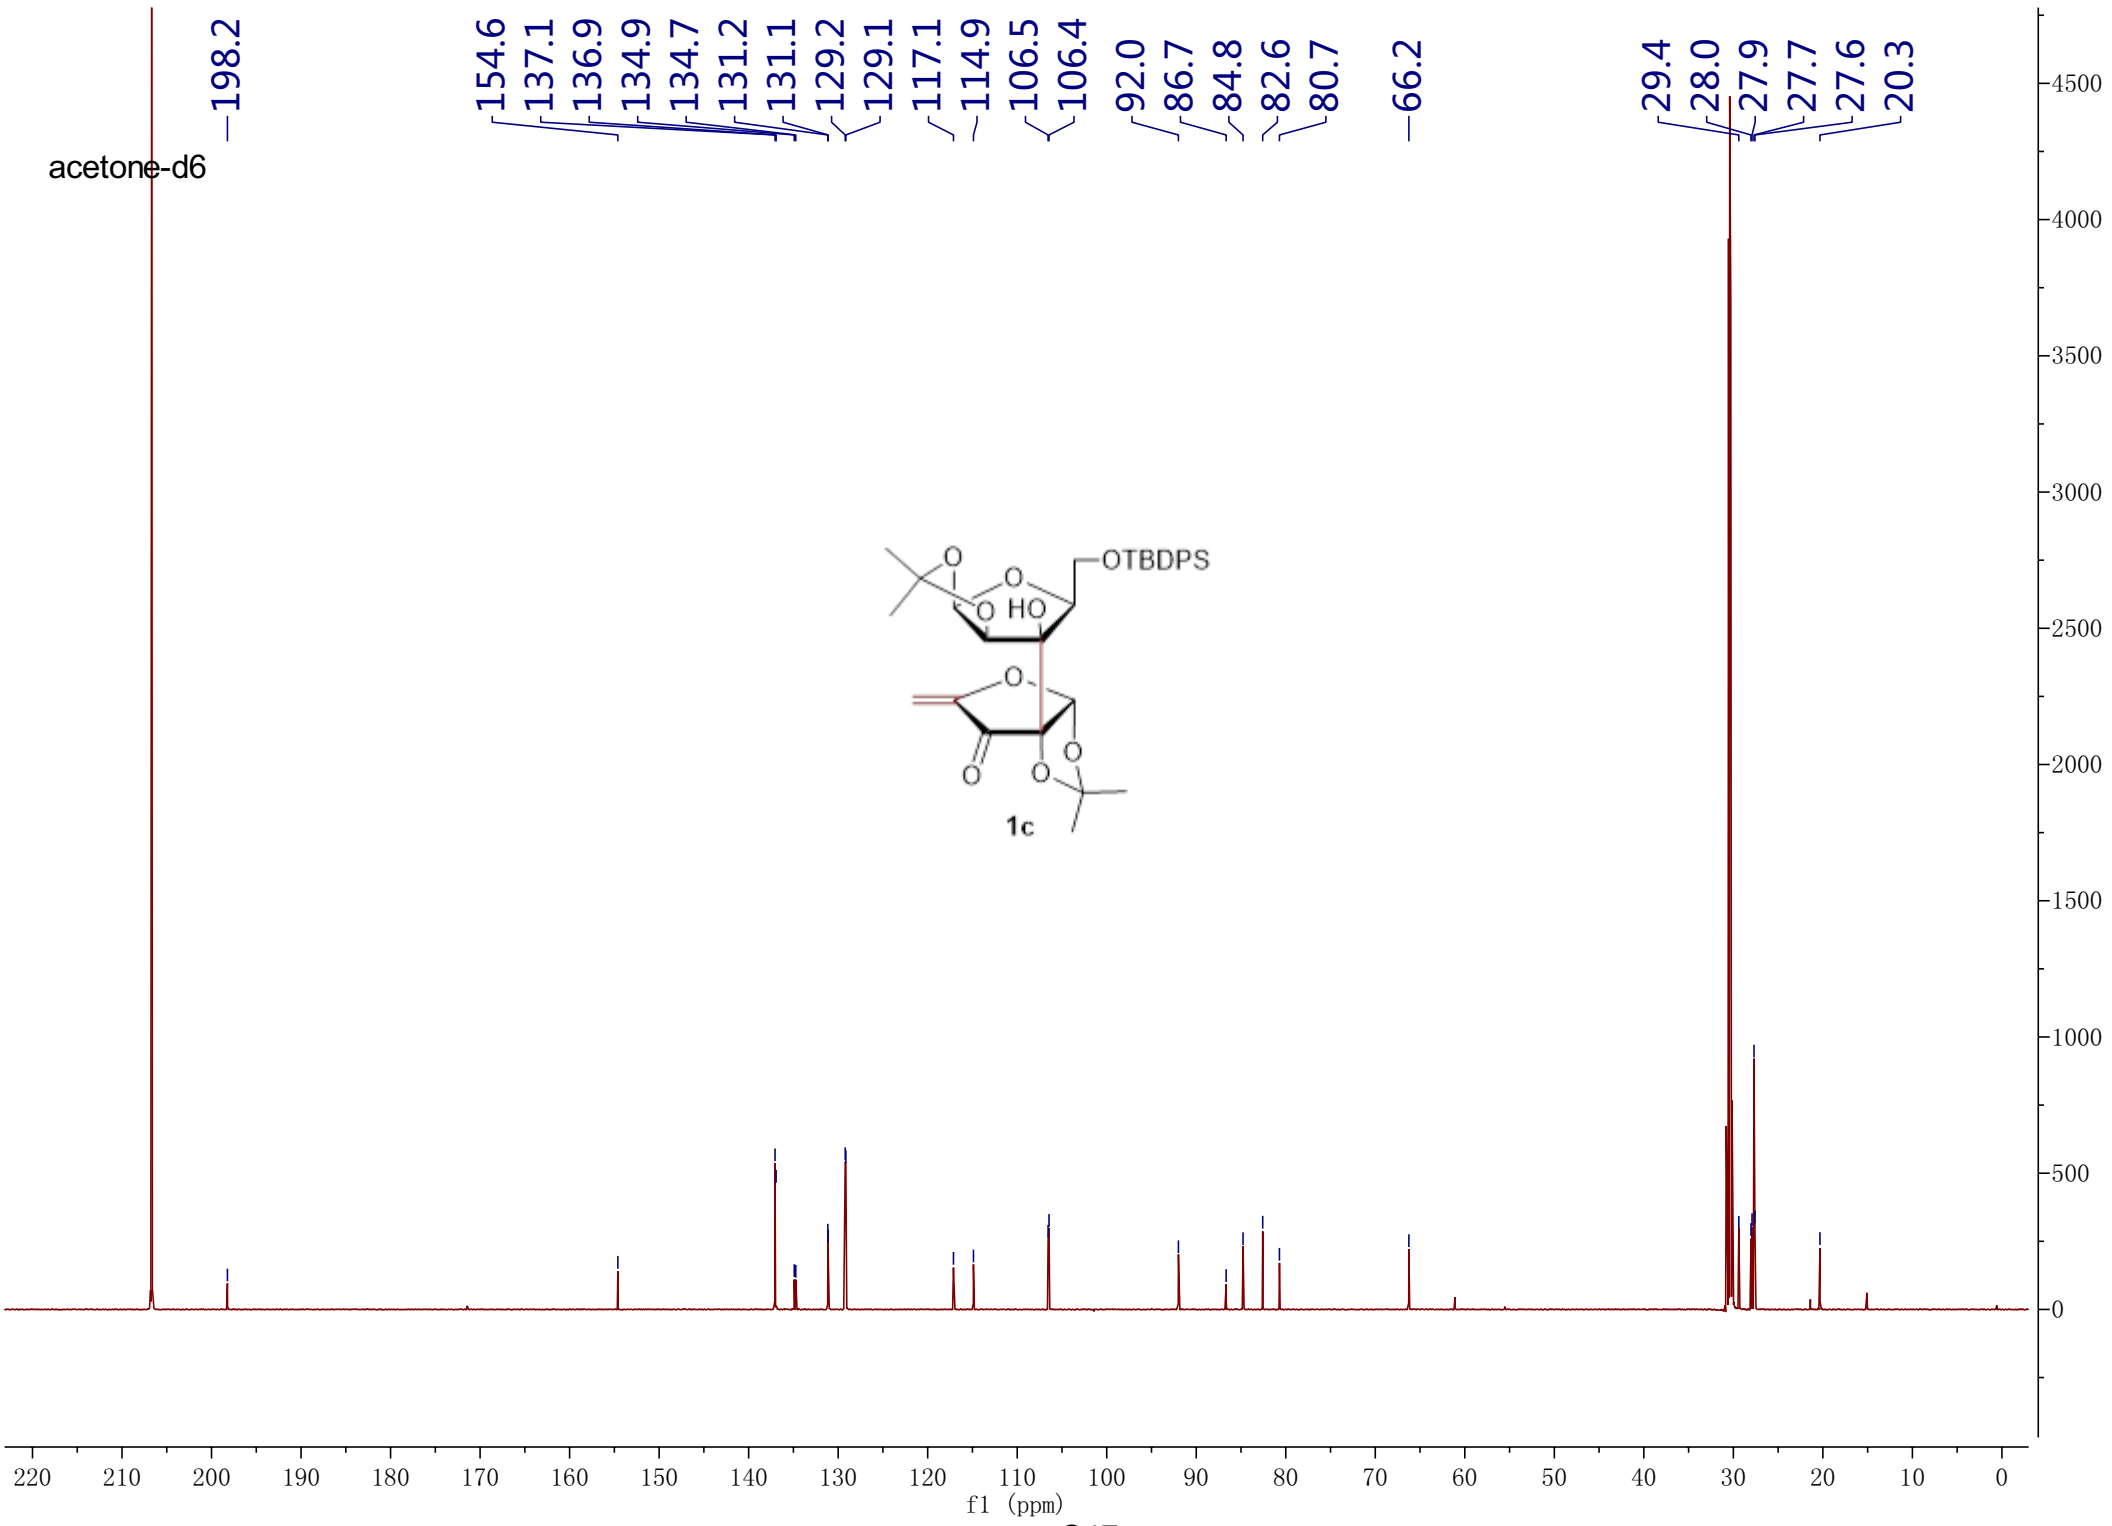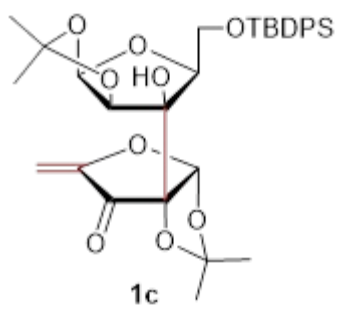

COSY  
acetone-d6

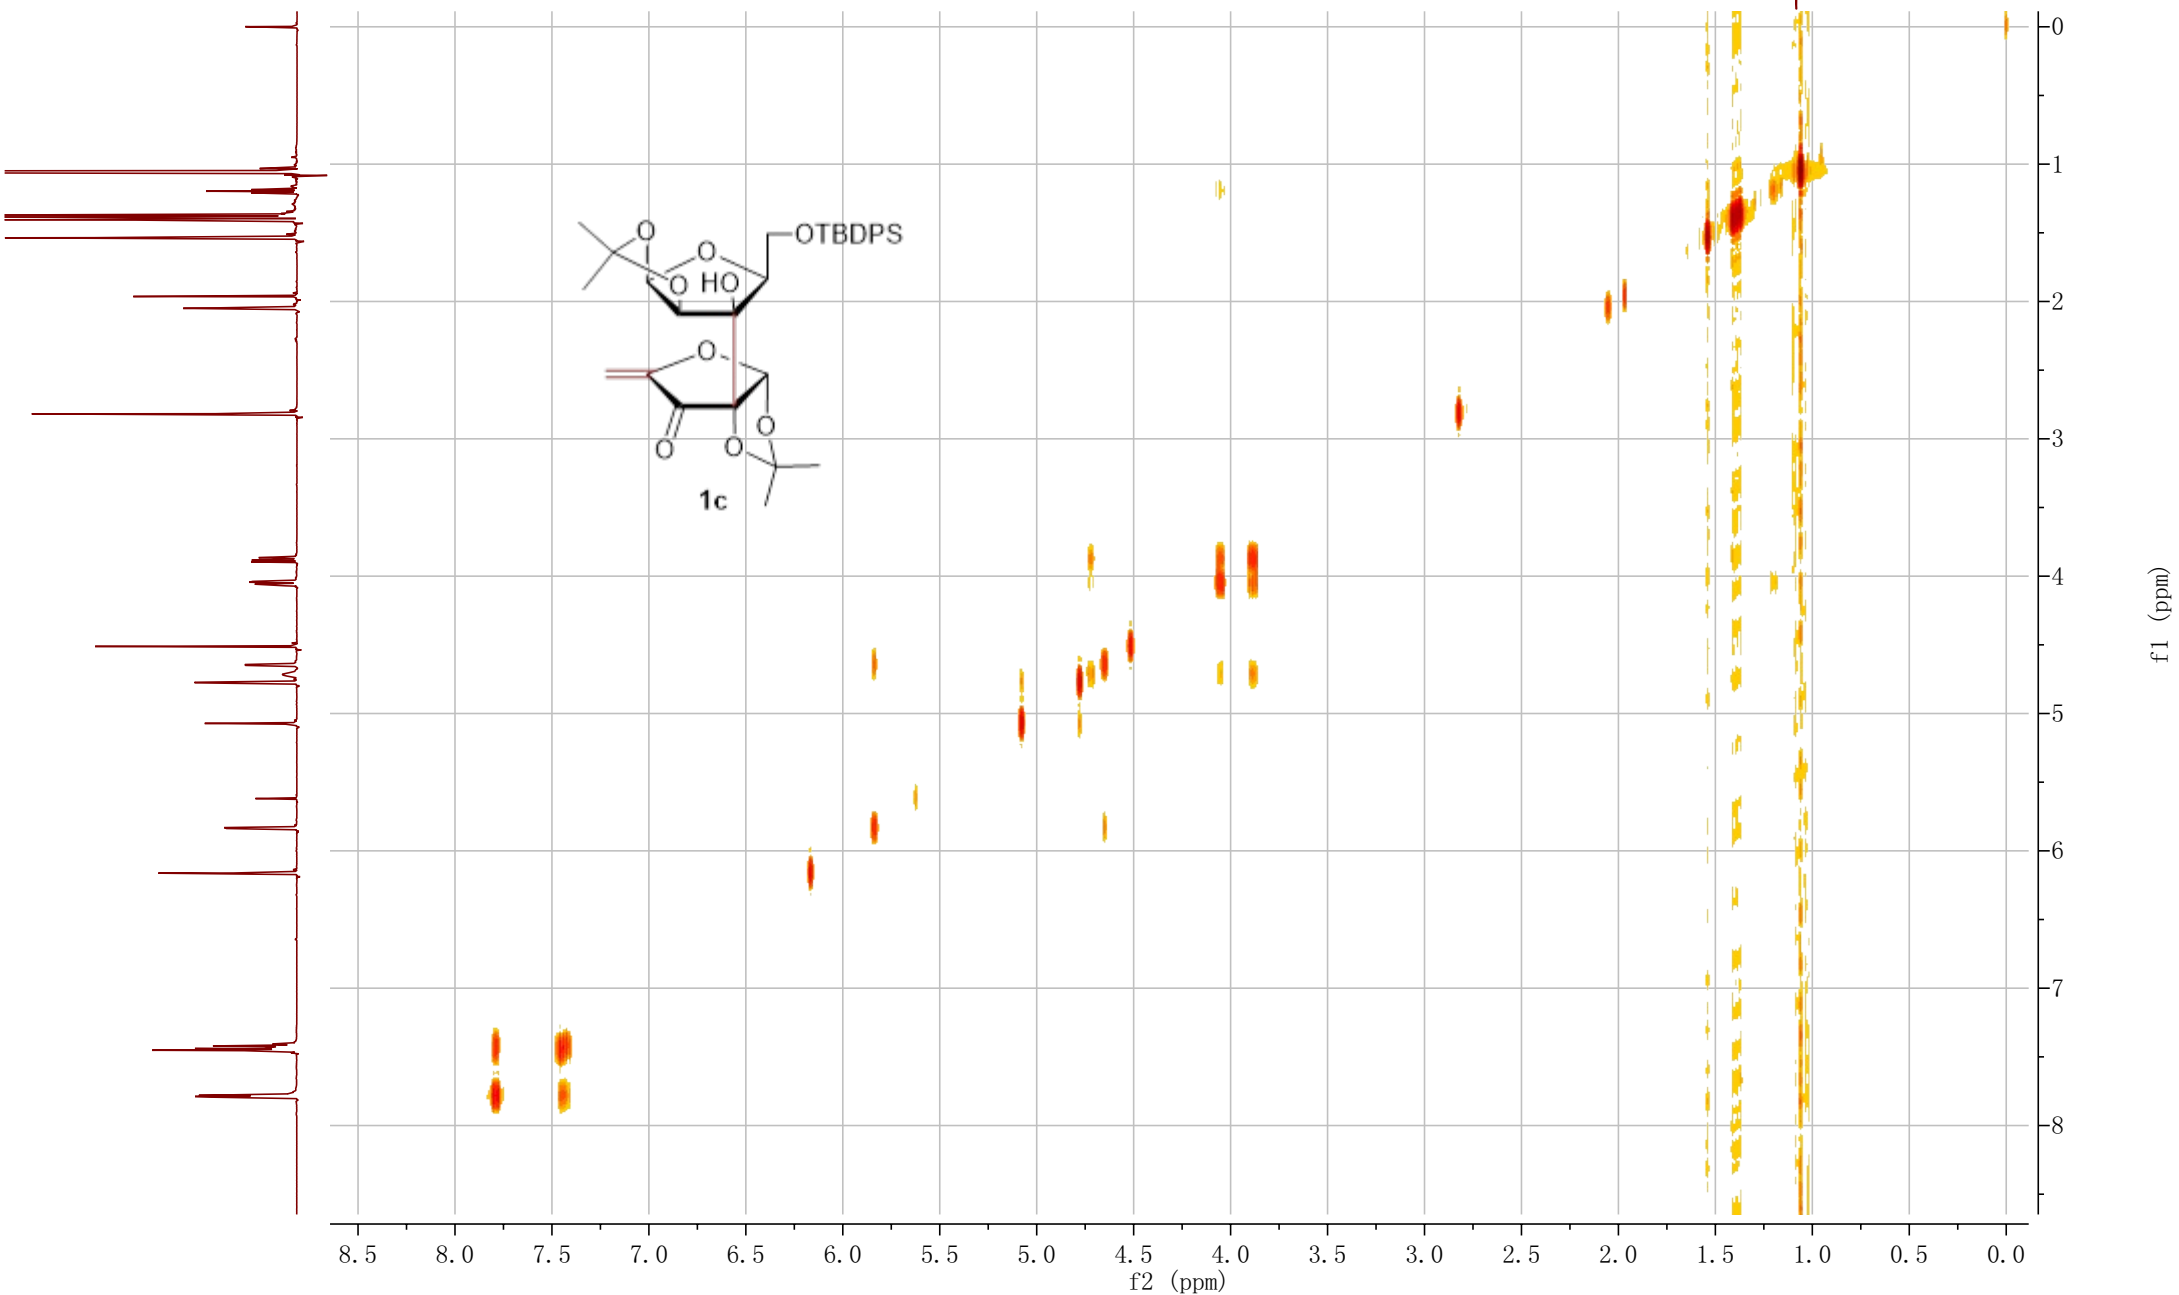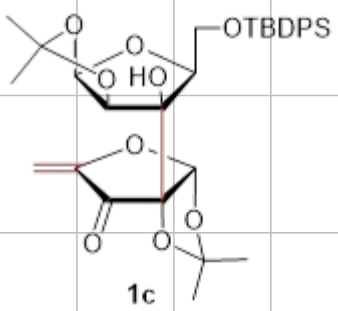

S48



8.07  
8.06  
8.06  
8.01  
8.00  
8.00  
7.57  
7.56  
7.54  
7.52  
7.51  
7.45  
7.43  
7.43  
7.41  
7.40  
6.10  
6.07  
6.06  
4.85  
4.84  
4.81  
4.80  
4.79  
4.79  
4.76  
4.76  
4.68  
4.67  
4.61  
4.60  
4.59  
4.58  
4.58  
4.57  
4.56  
3.53  
1.62  
1.47  
1.46  
1.40

d-chloroform

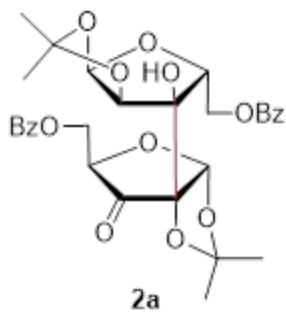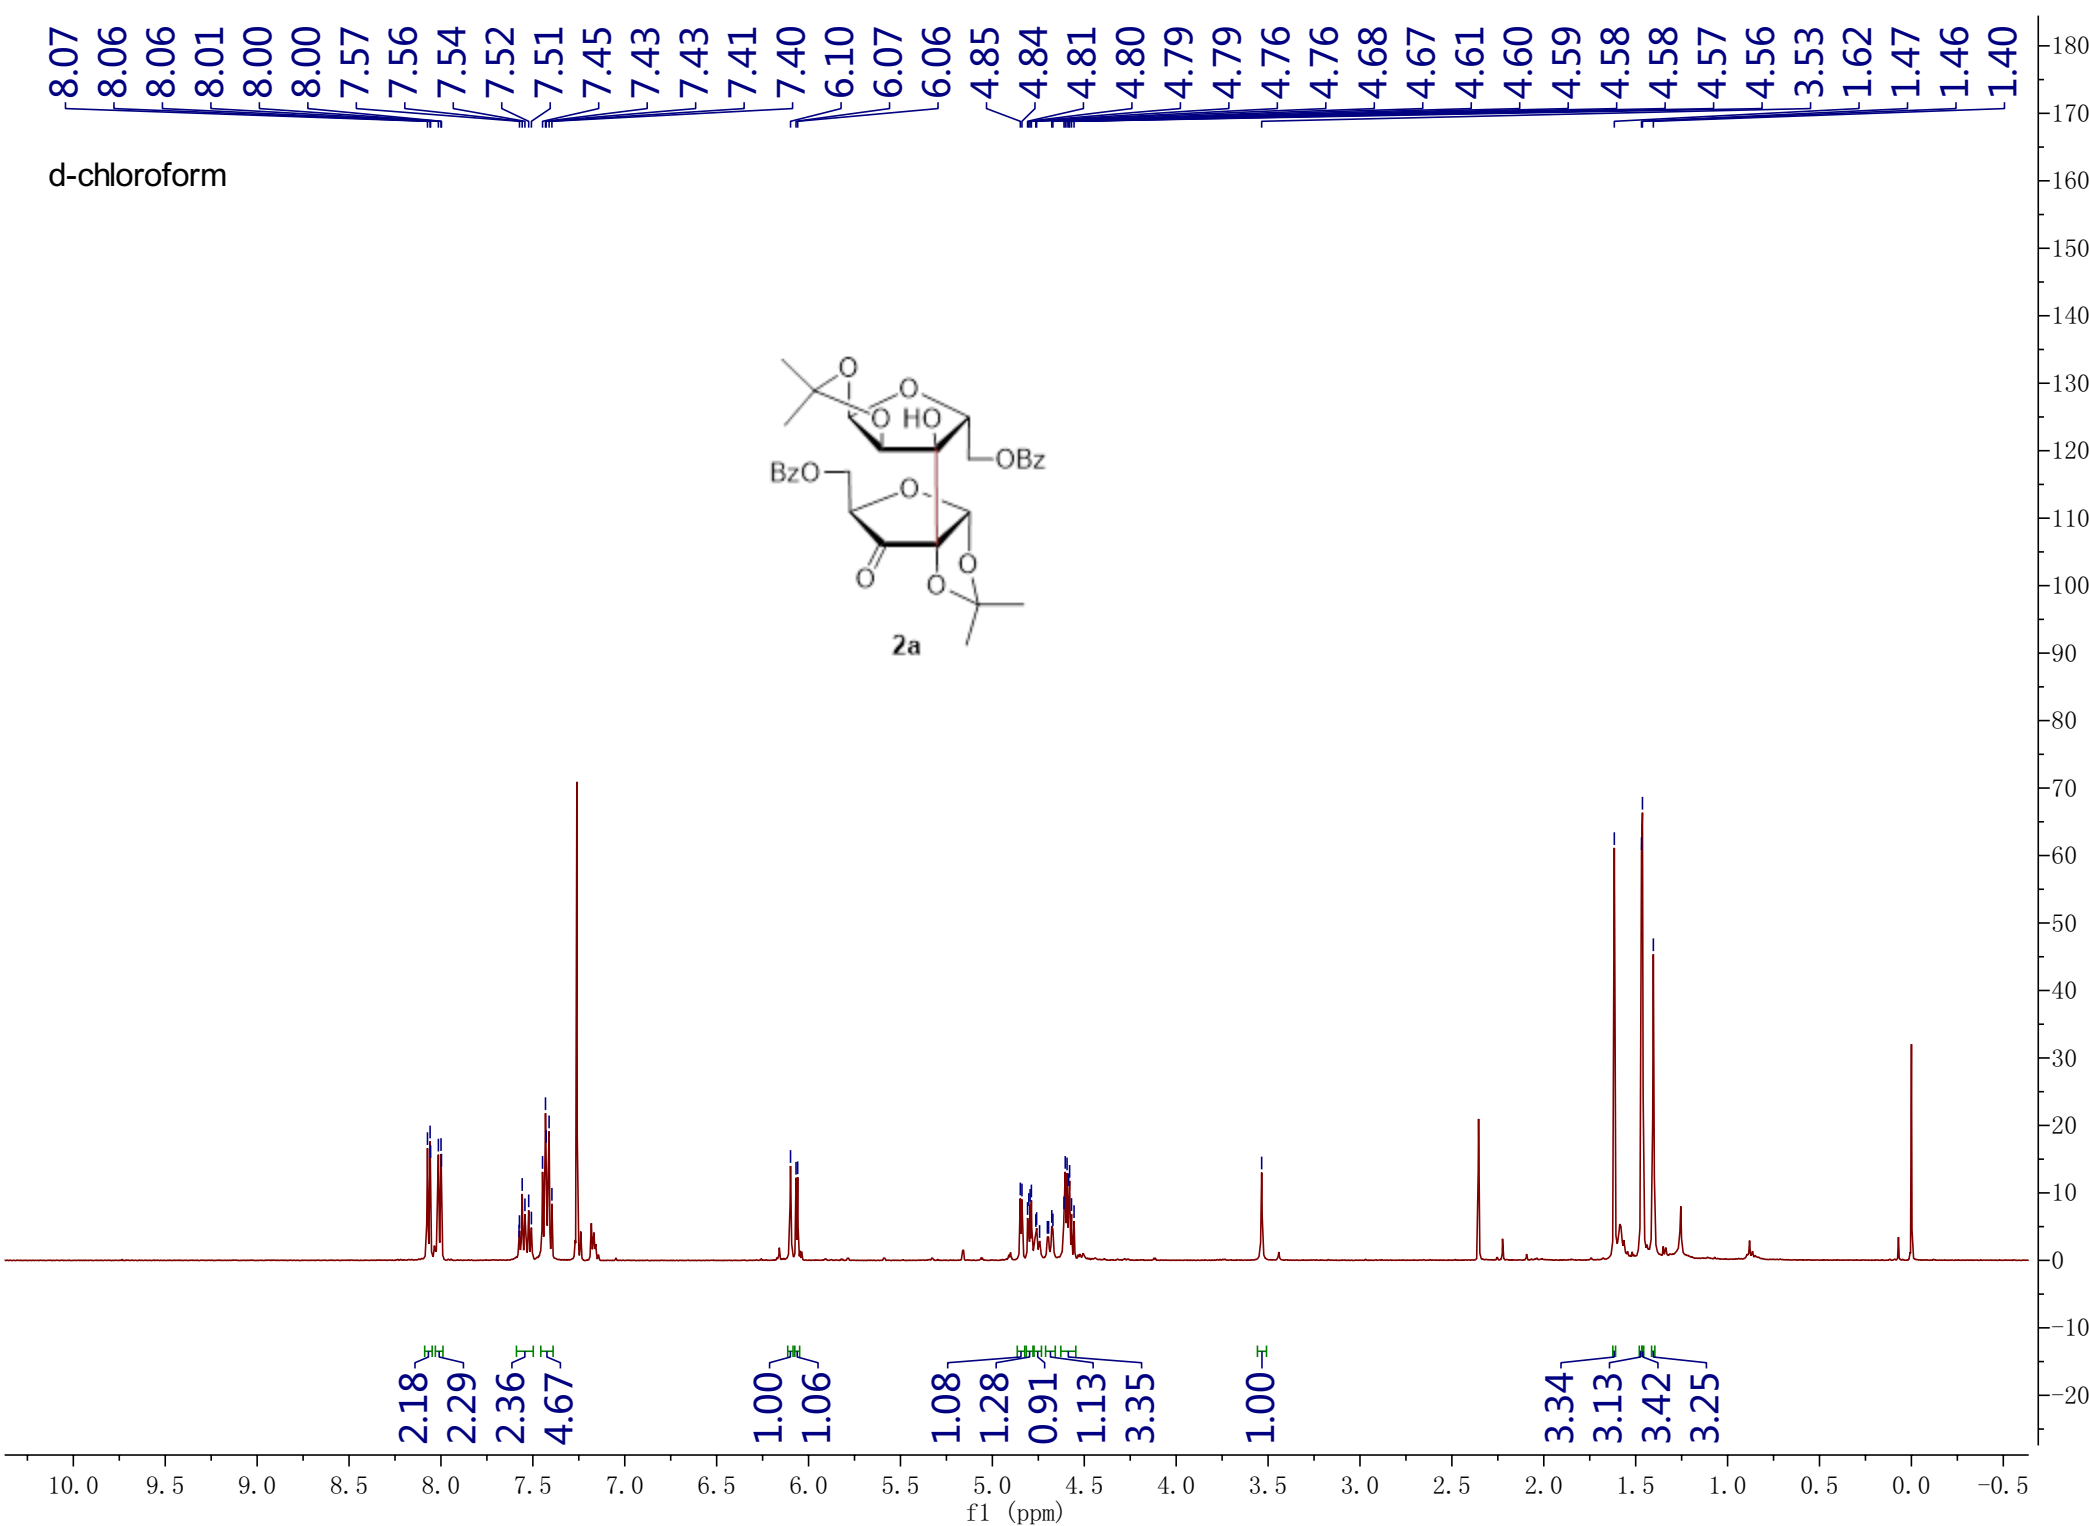

d-chloroform

—195.2

166.5

166.3

133.5

133.4

130.2

130.1

129.9

129.8

129.3

115.3

105.7

105.3

85.2

80.7

79.1

78.7

77.5

63.4

63.2

28.4

28.3

27.5

27.1

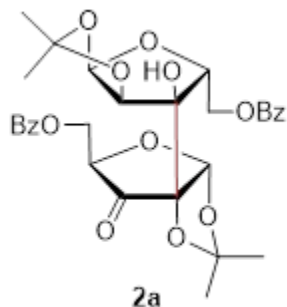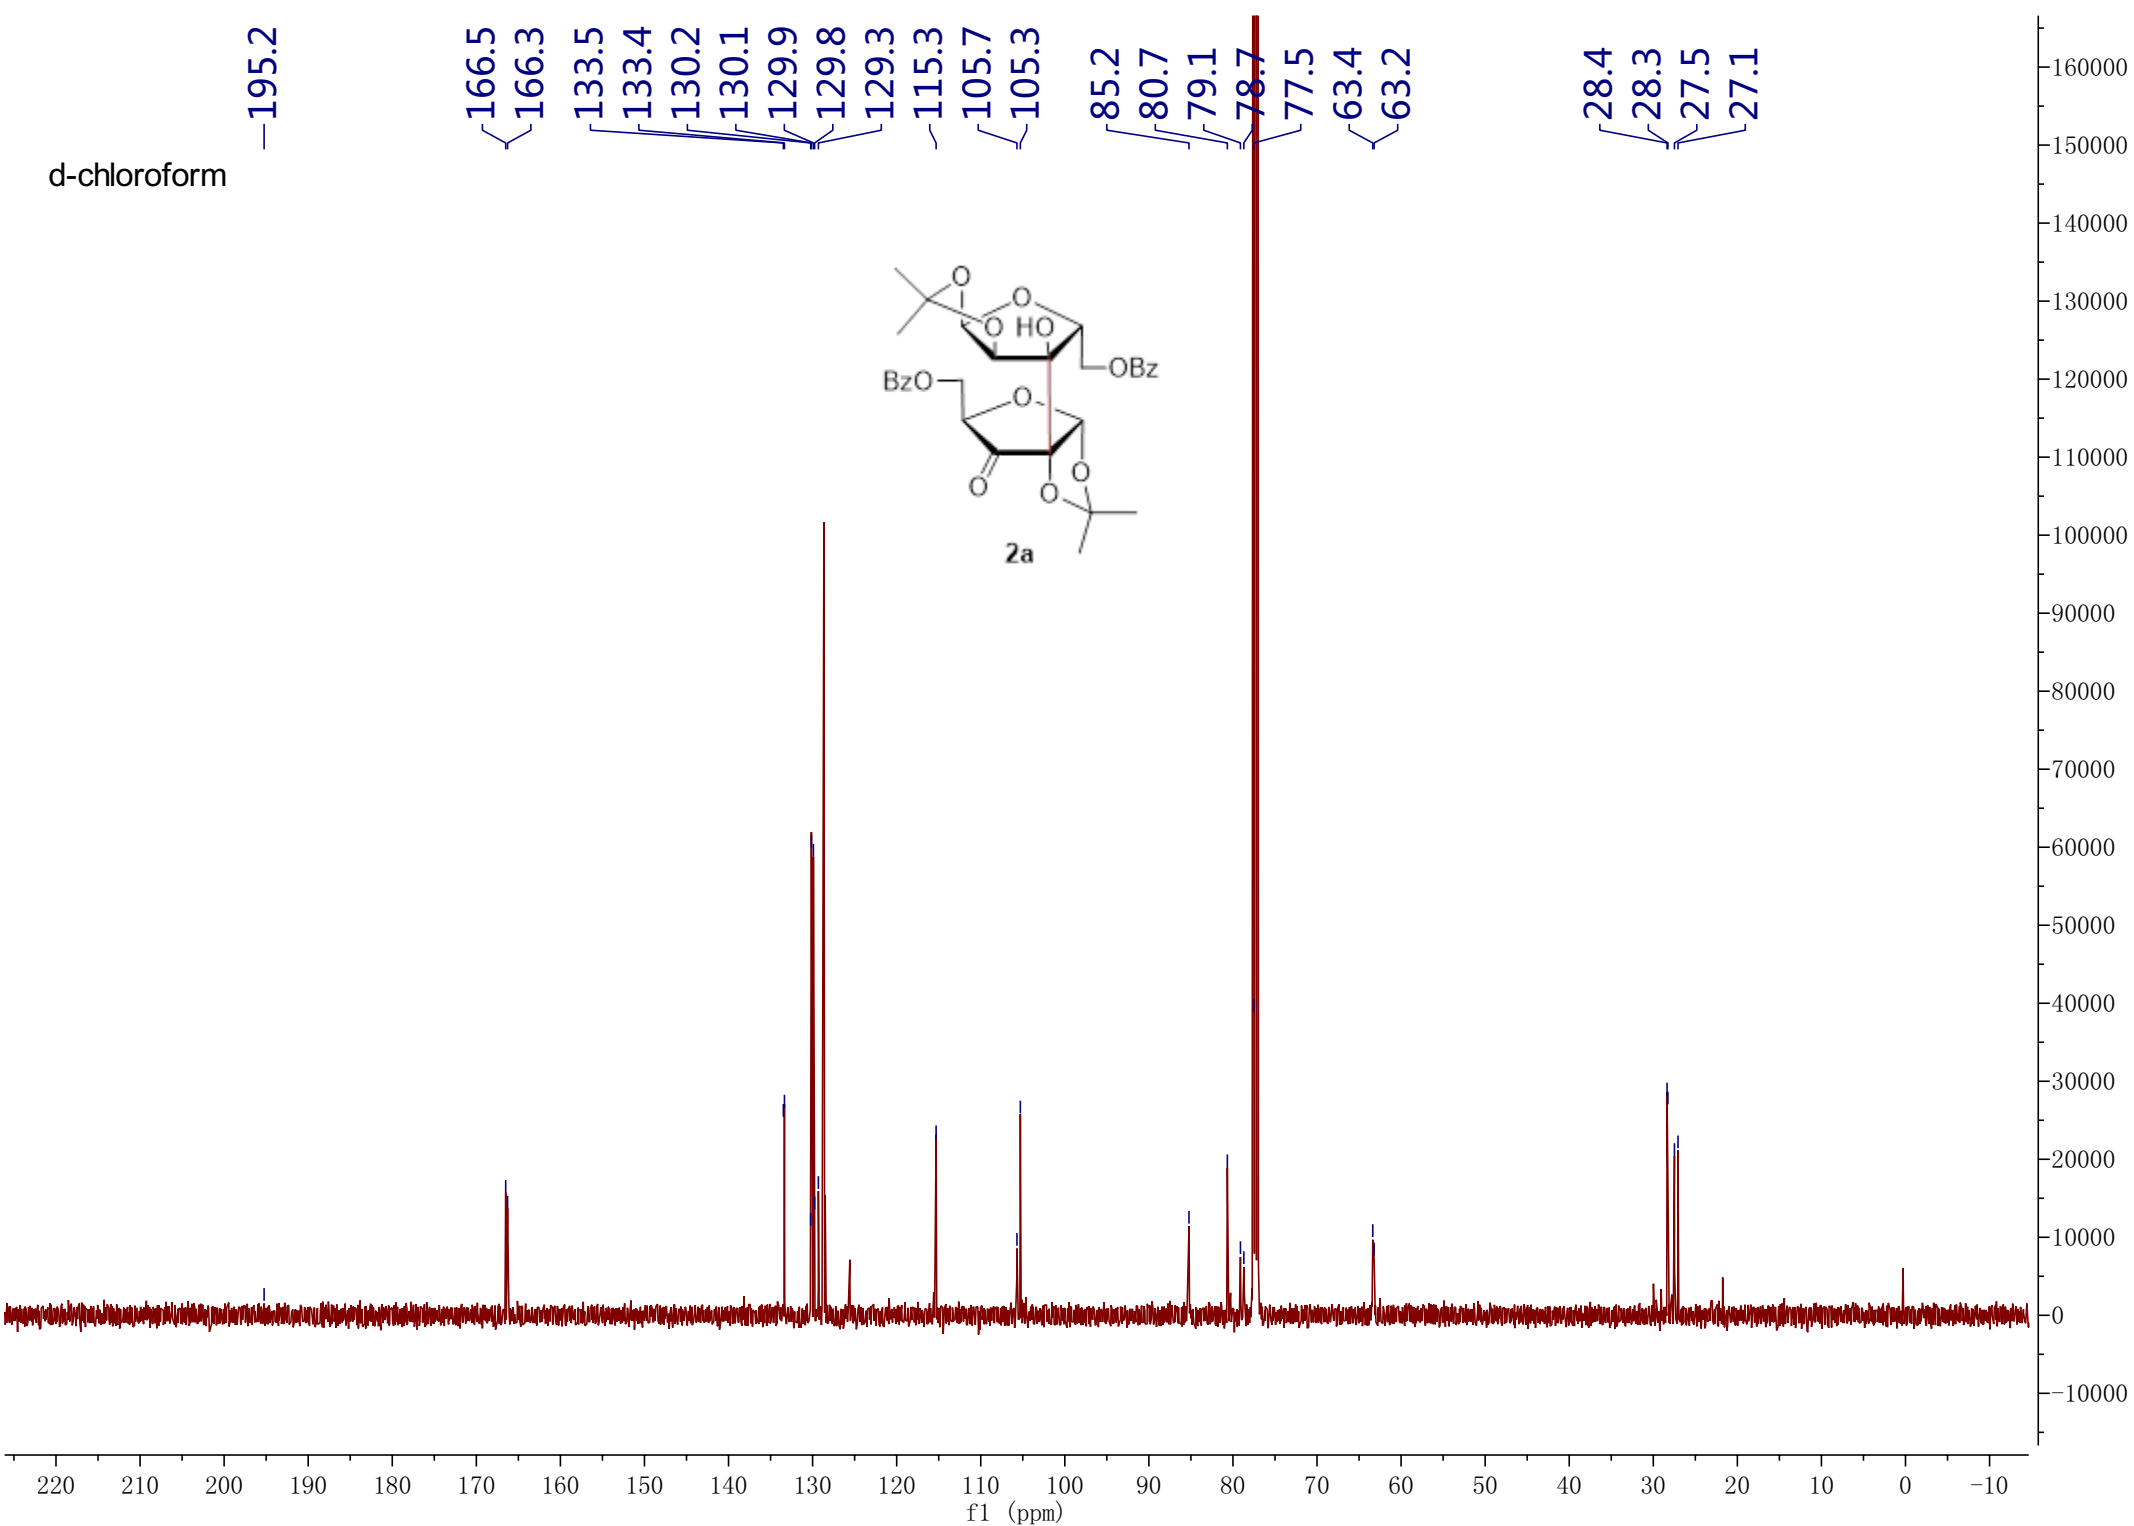

S50

COSY  
d-chloroform

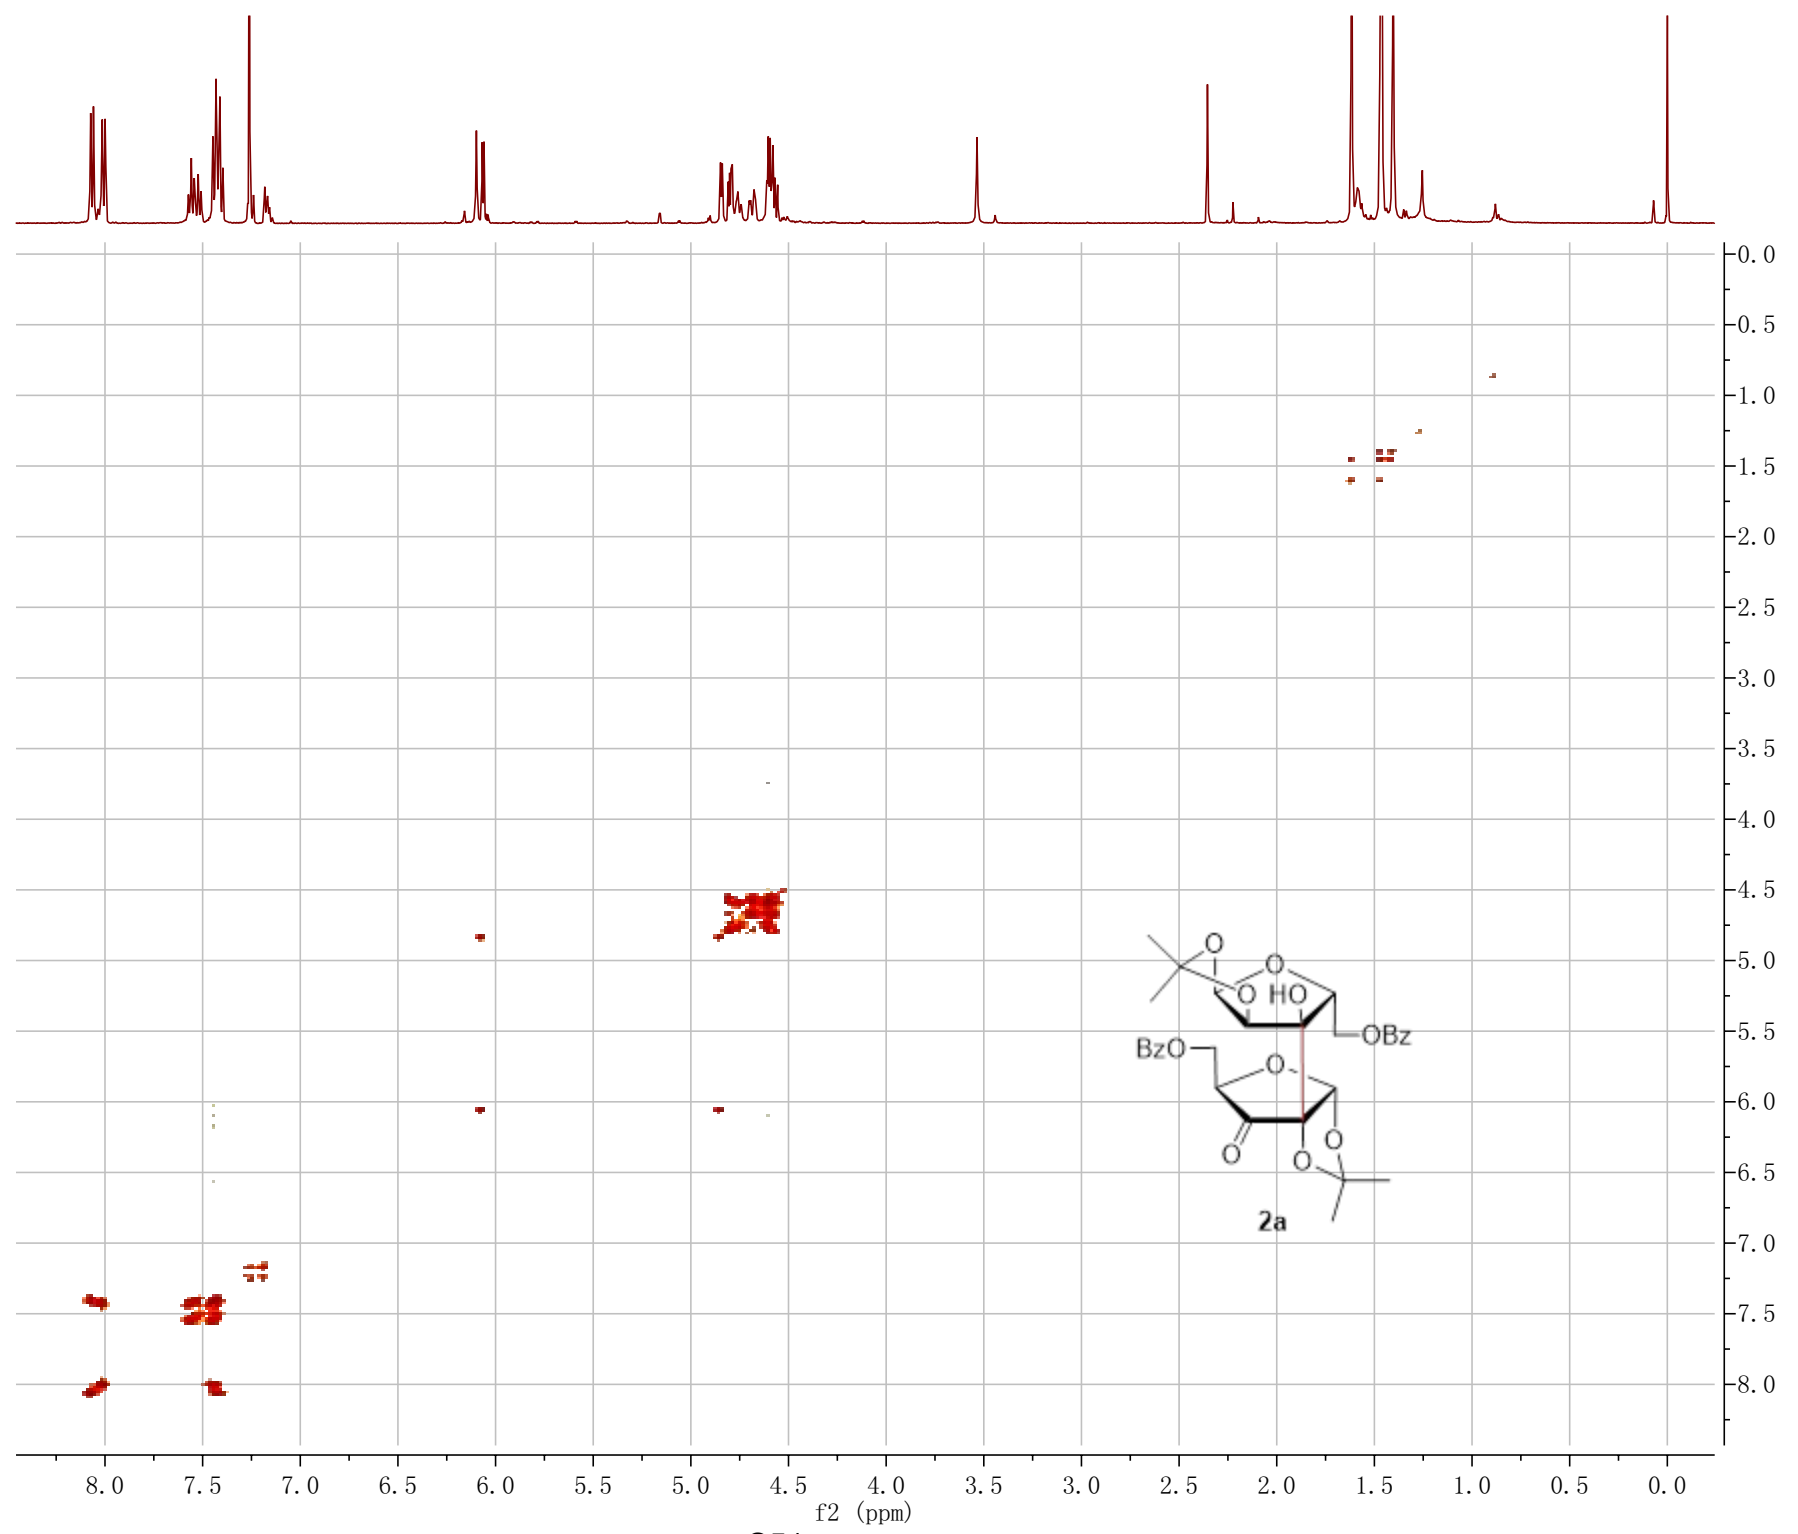

S51

HSQC  
d-chloroform

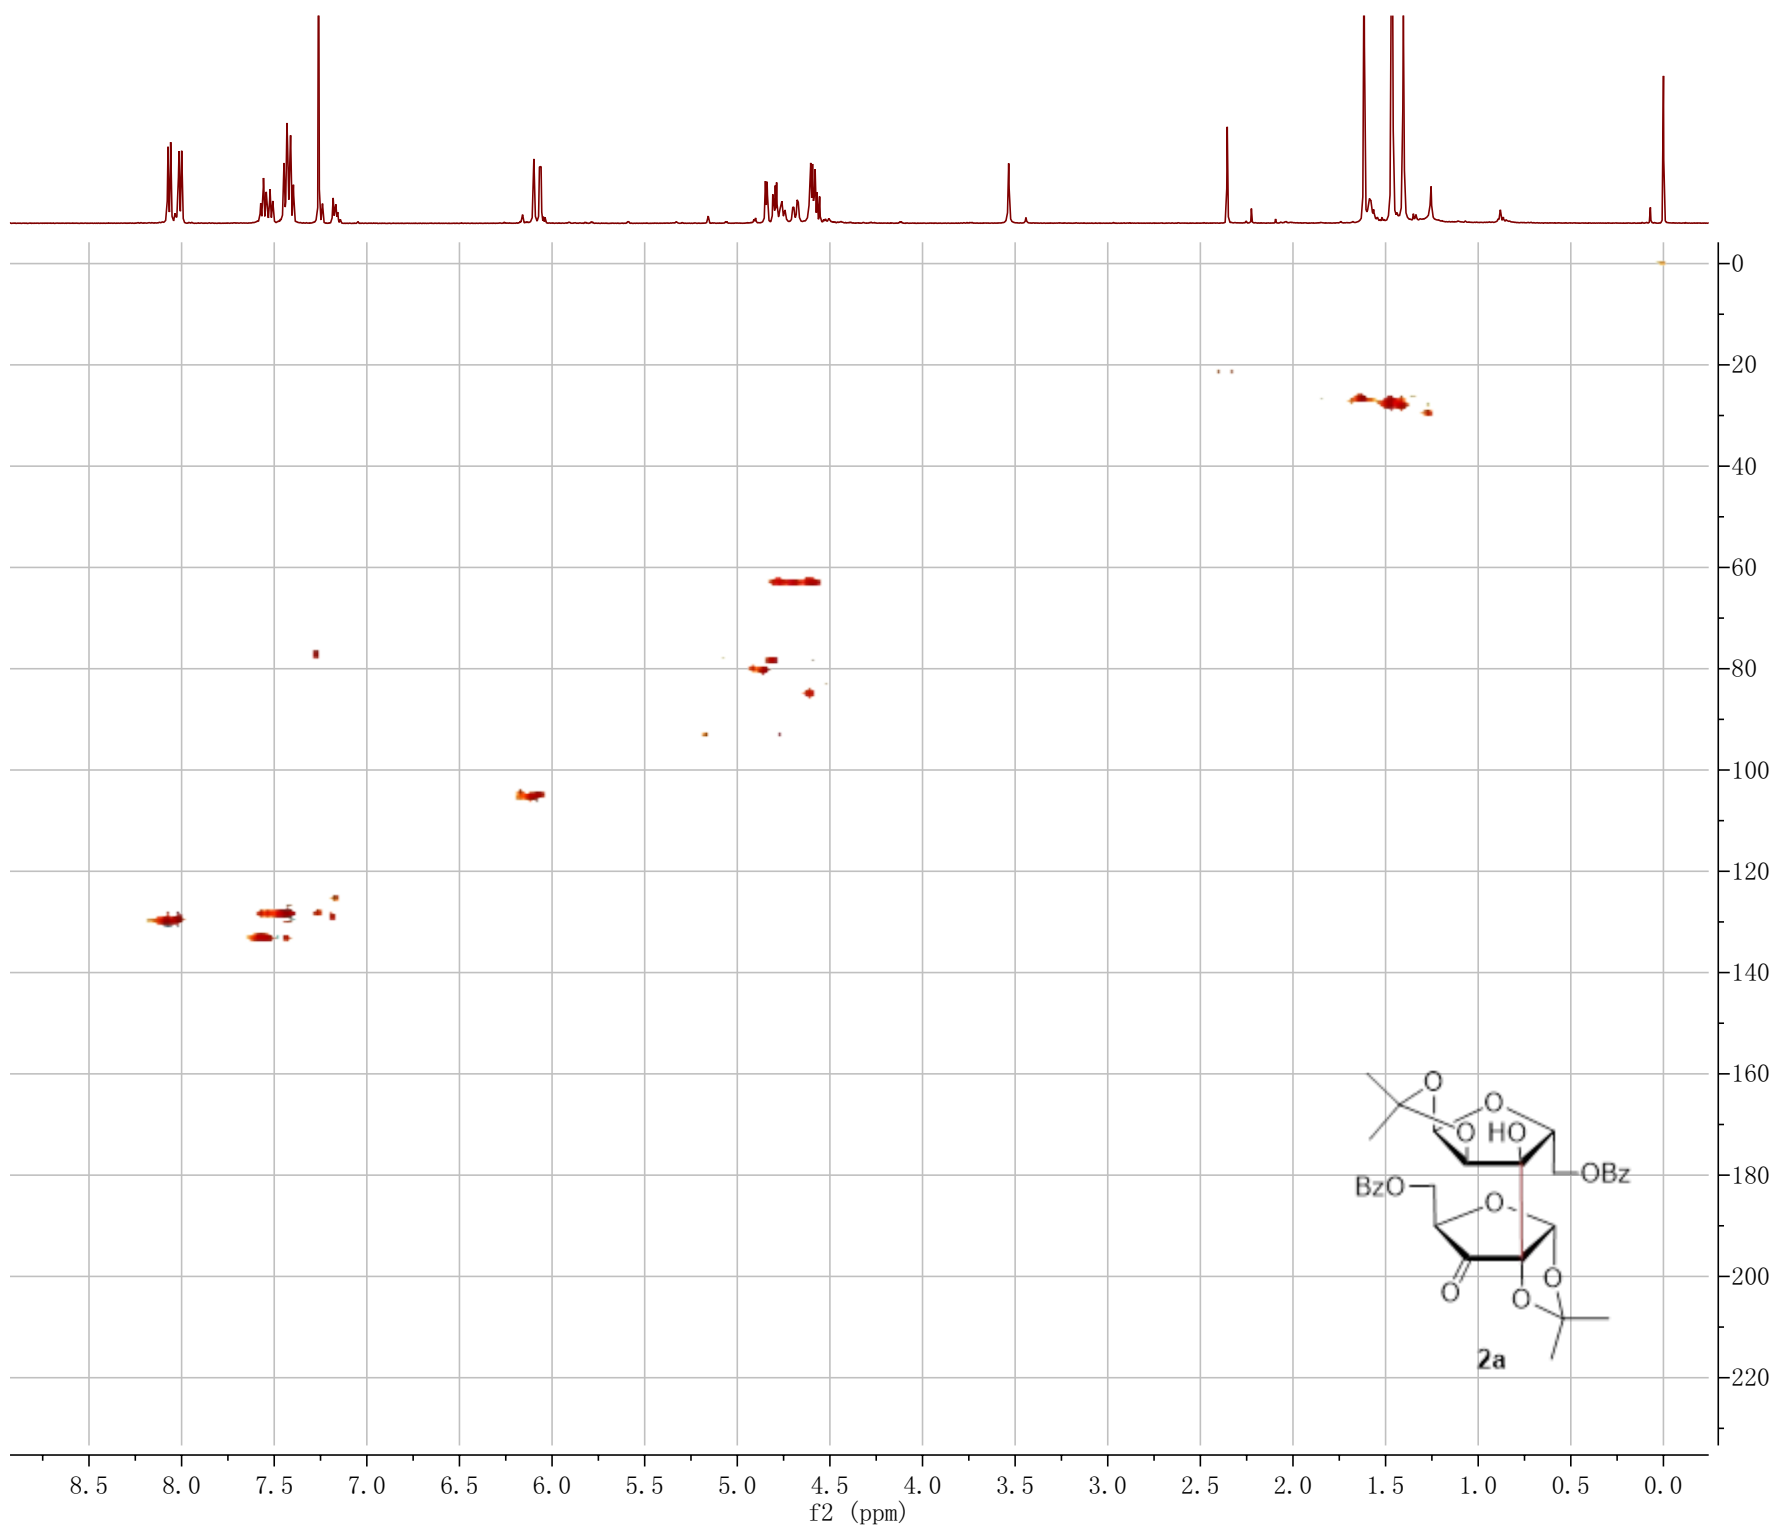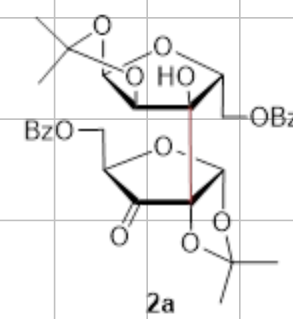

S52

HMBC  
d-chloroform

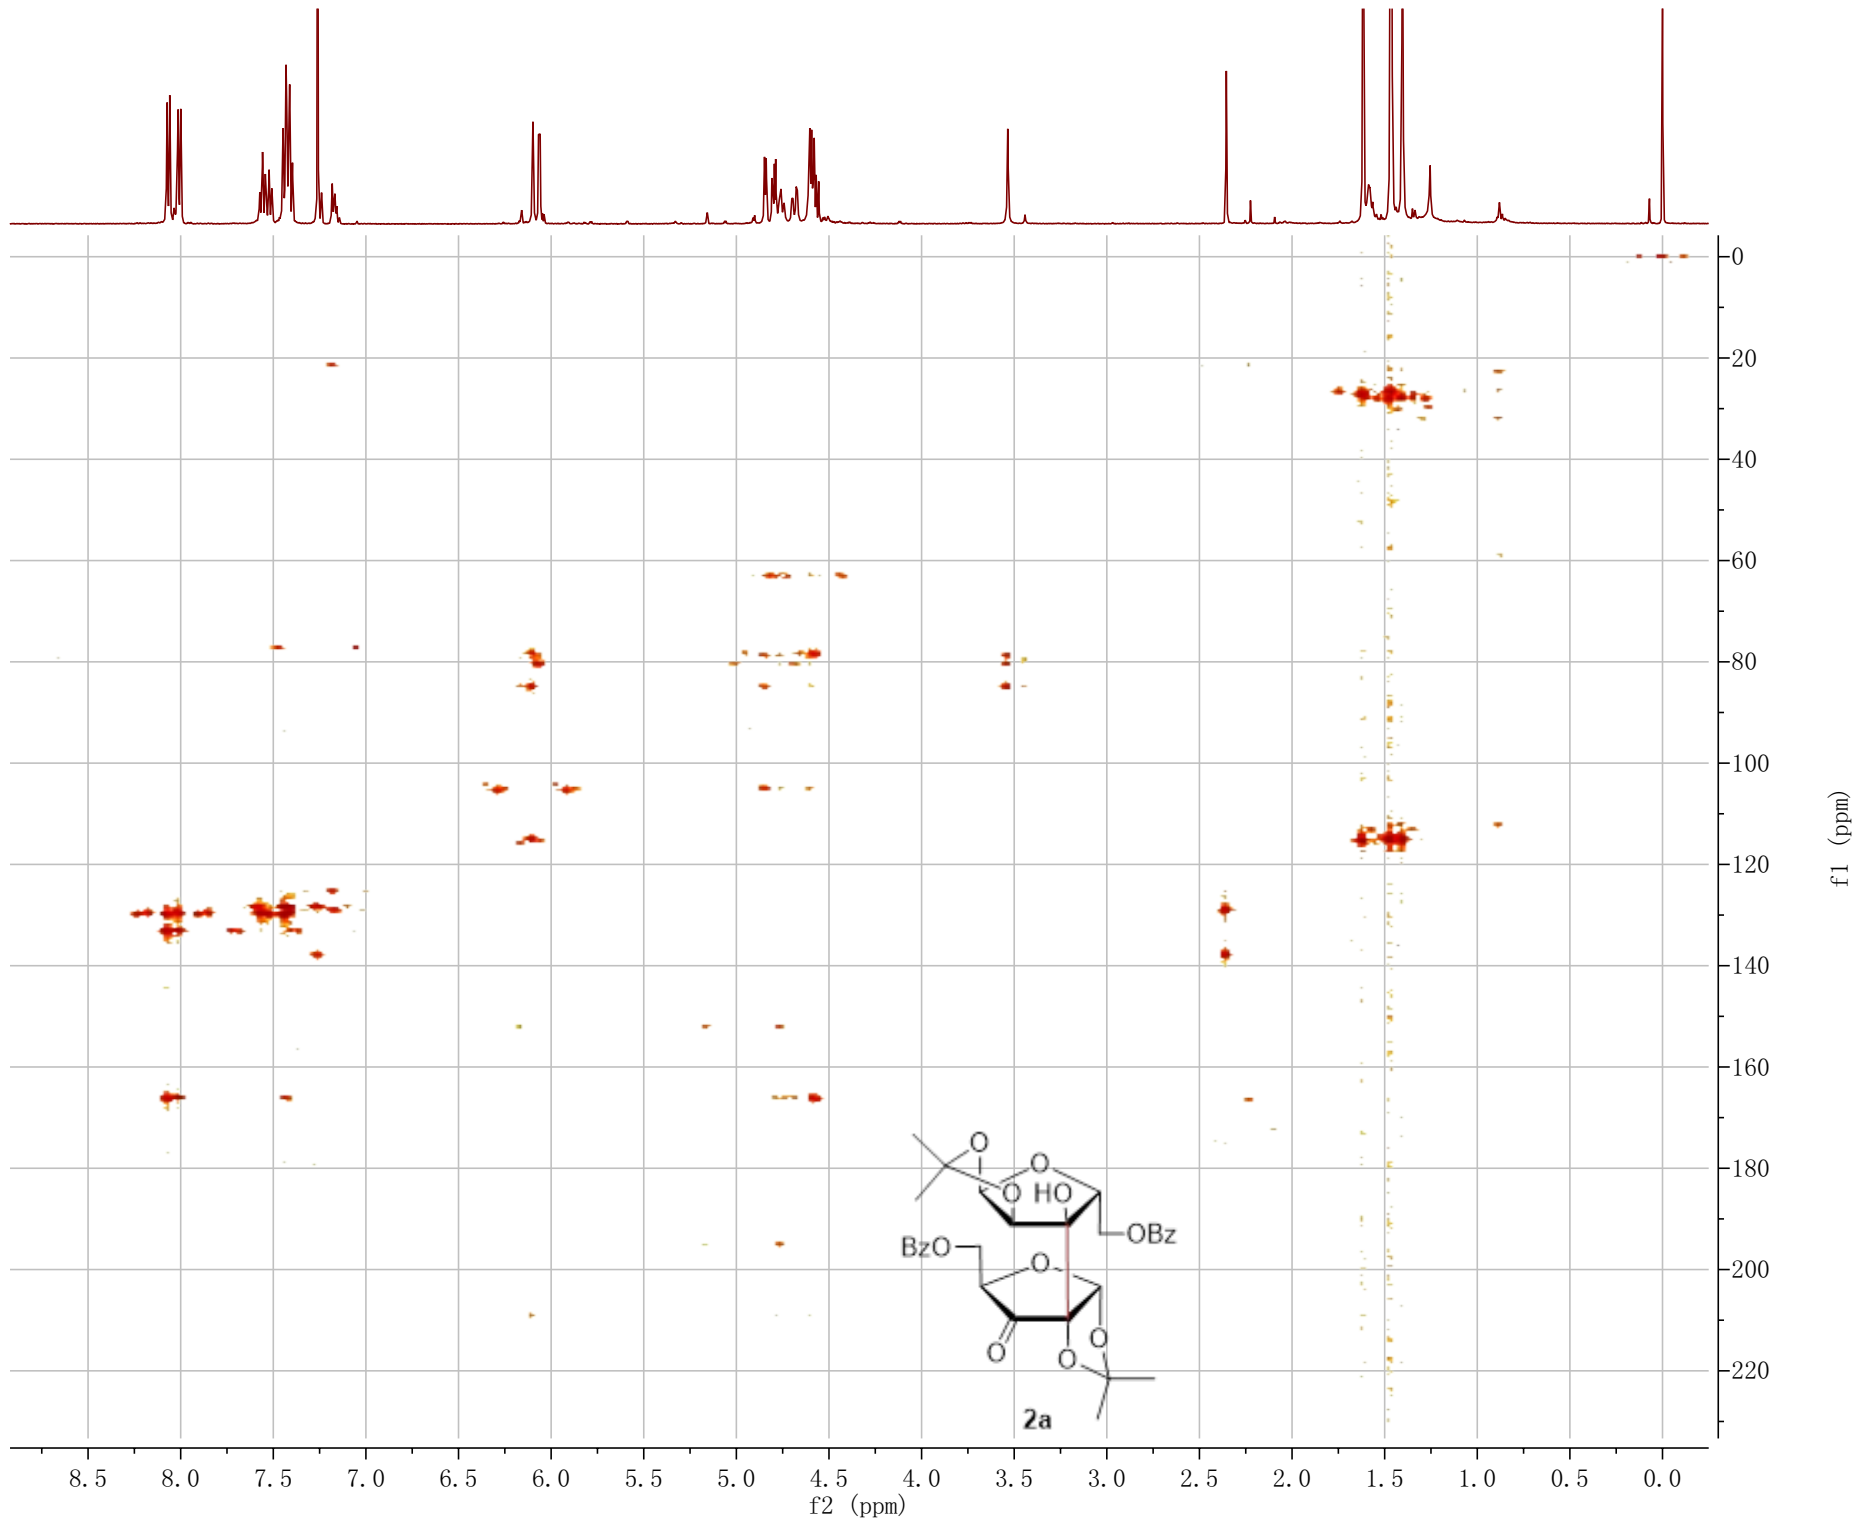

S53

NOESY  
d-chloroform

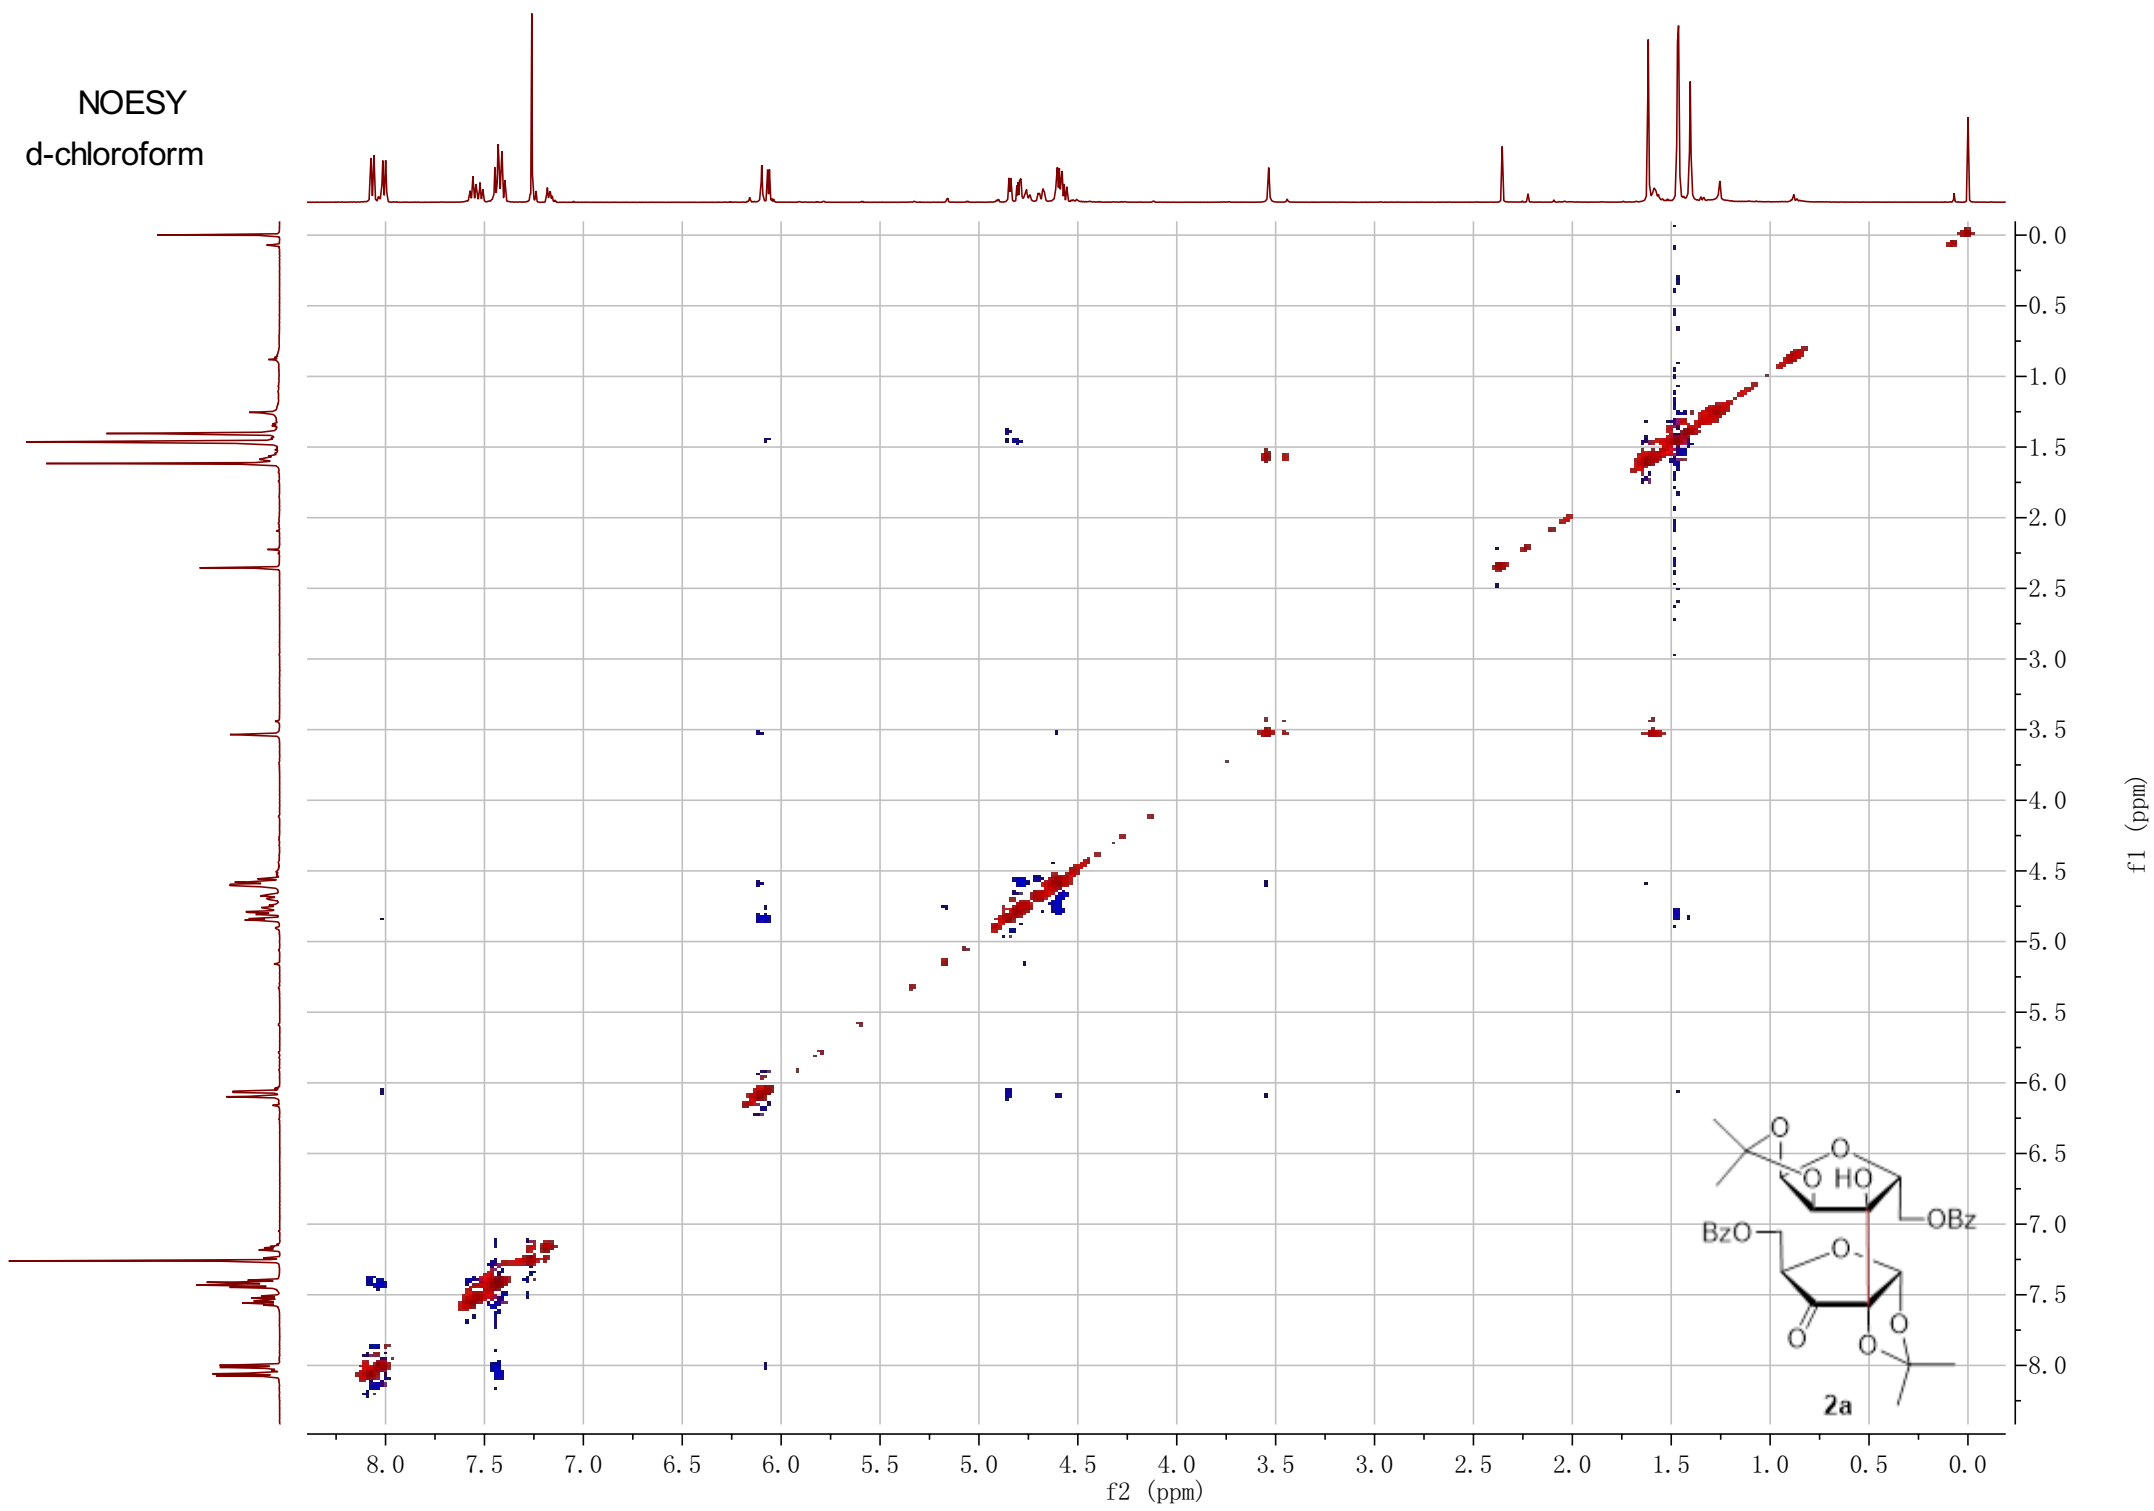

S54

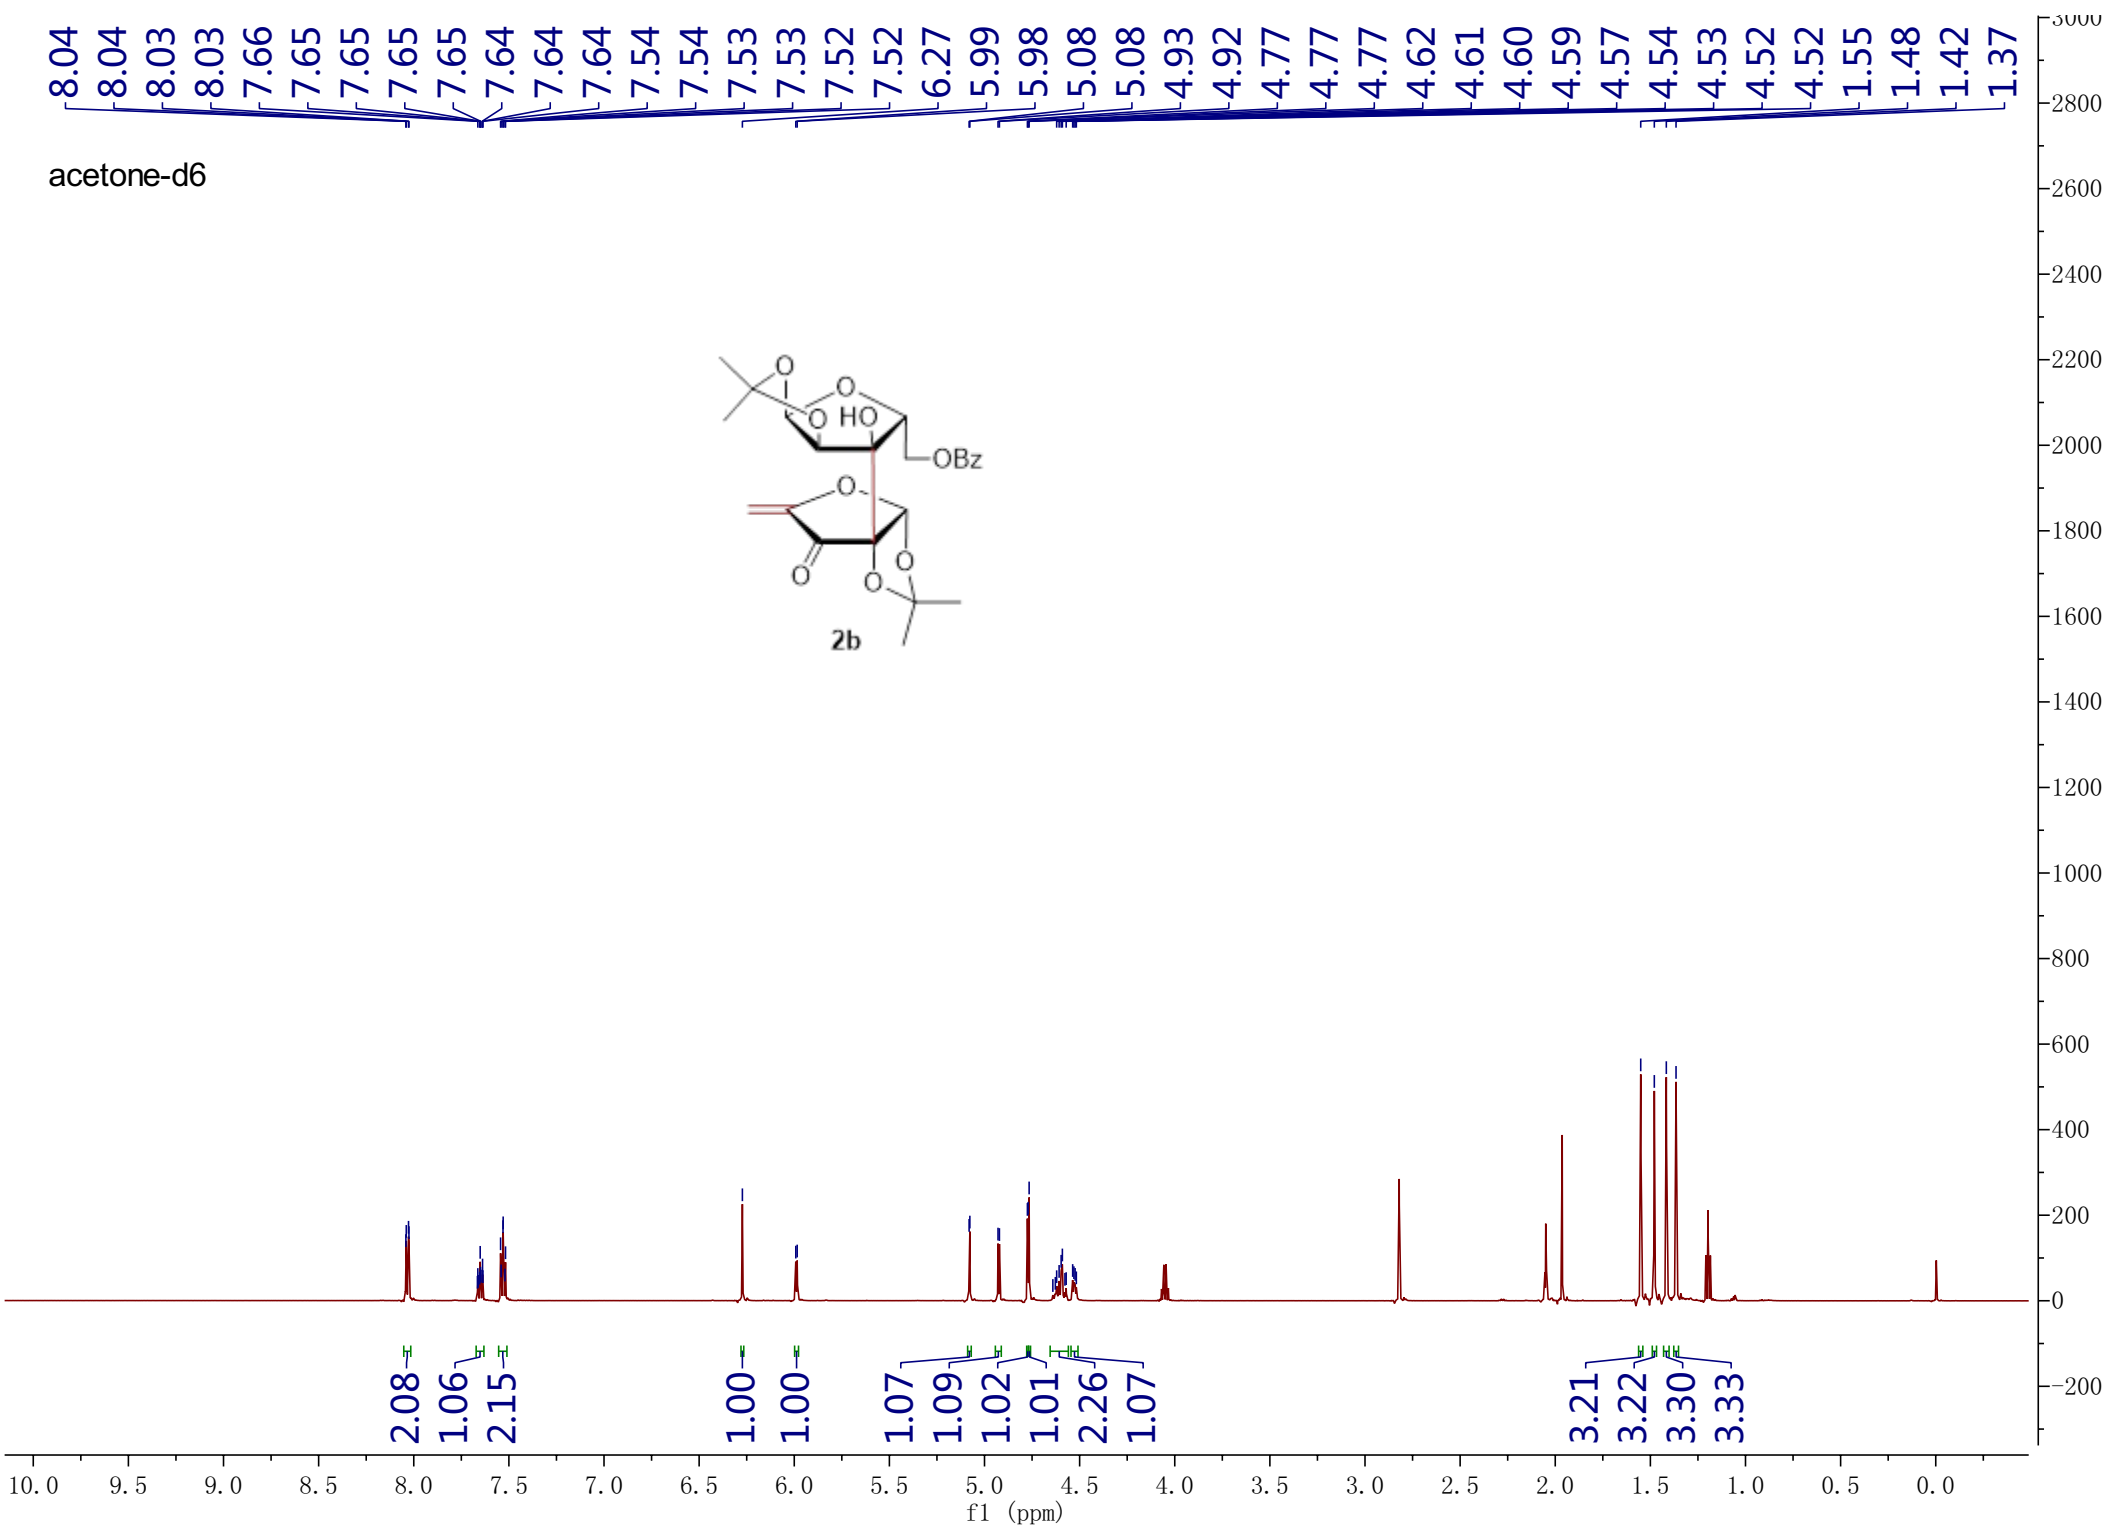

acetone-d6

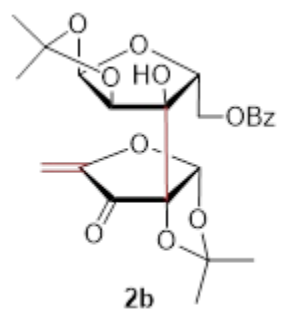

acetone-d6

197.2

166.9

154.3

134.6

131.5

130.9

130.0

117.1

115.2

106.3

106.2

92.6

86.8

81.8

81.4

64.0

61.1

29.5

28.1

27.8

27.4

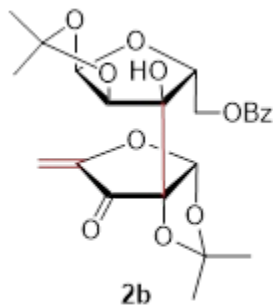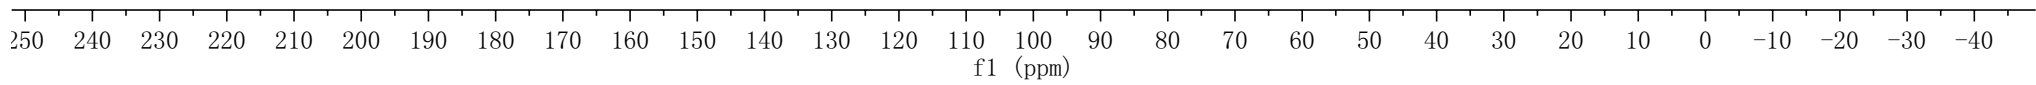



COSY  
acetone-d6

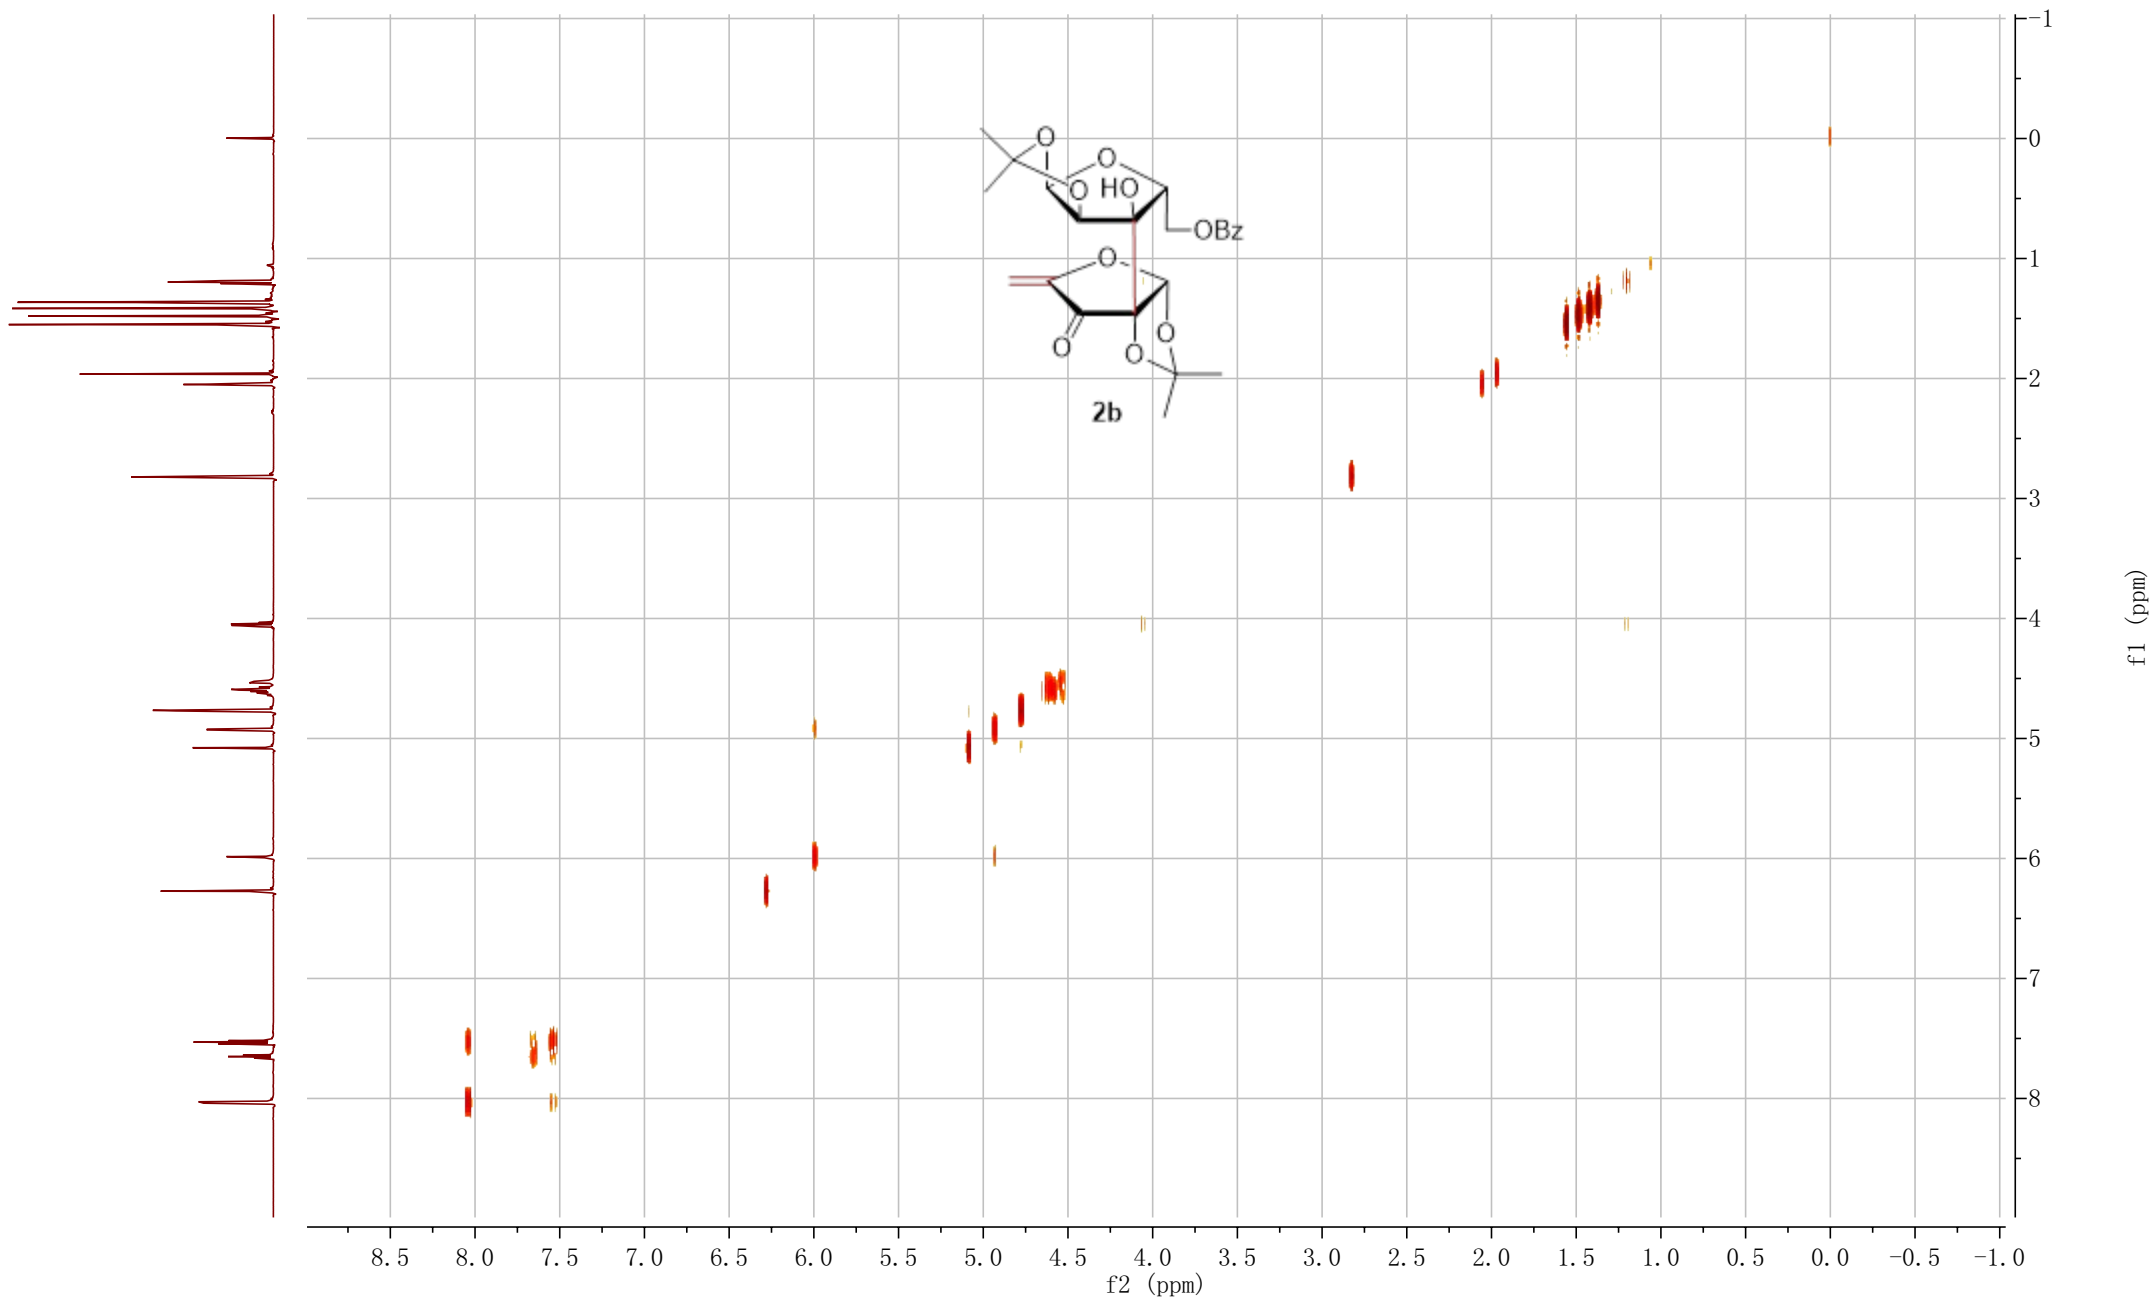

S57

d-chloroform

7.35  
7.35  
7.34  
7.34  
7.32  
7.31  
7.29

6.00  
5.97  
5.97

4.88  
4.87  
4.59  
4.58

4.56  
4.56  
4.55  
4.54  
4.52  
4.51

4.41  
4.40  
4.40  
4.39  
4.03

3.80  
3.79  
3.76  
3.75

3.74  
3.73  
3.72

3.71  
3.70  
3.22

1.58  
1.51  
1.50  
1.42

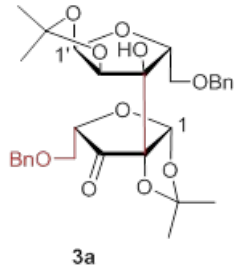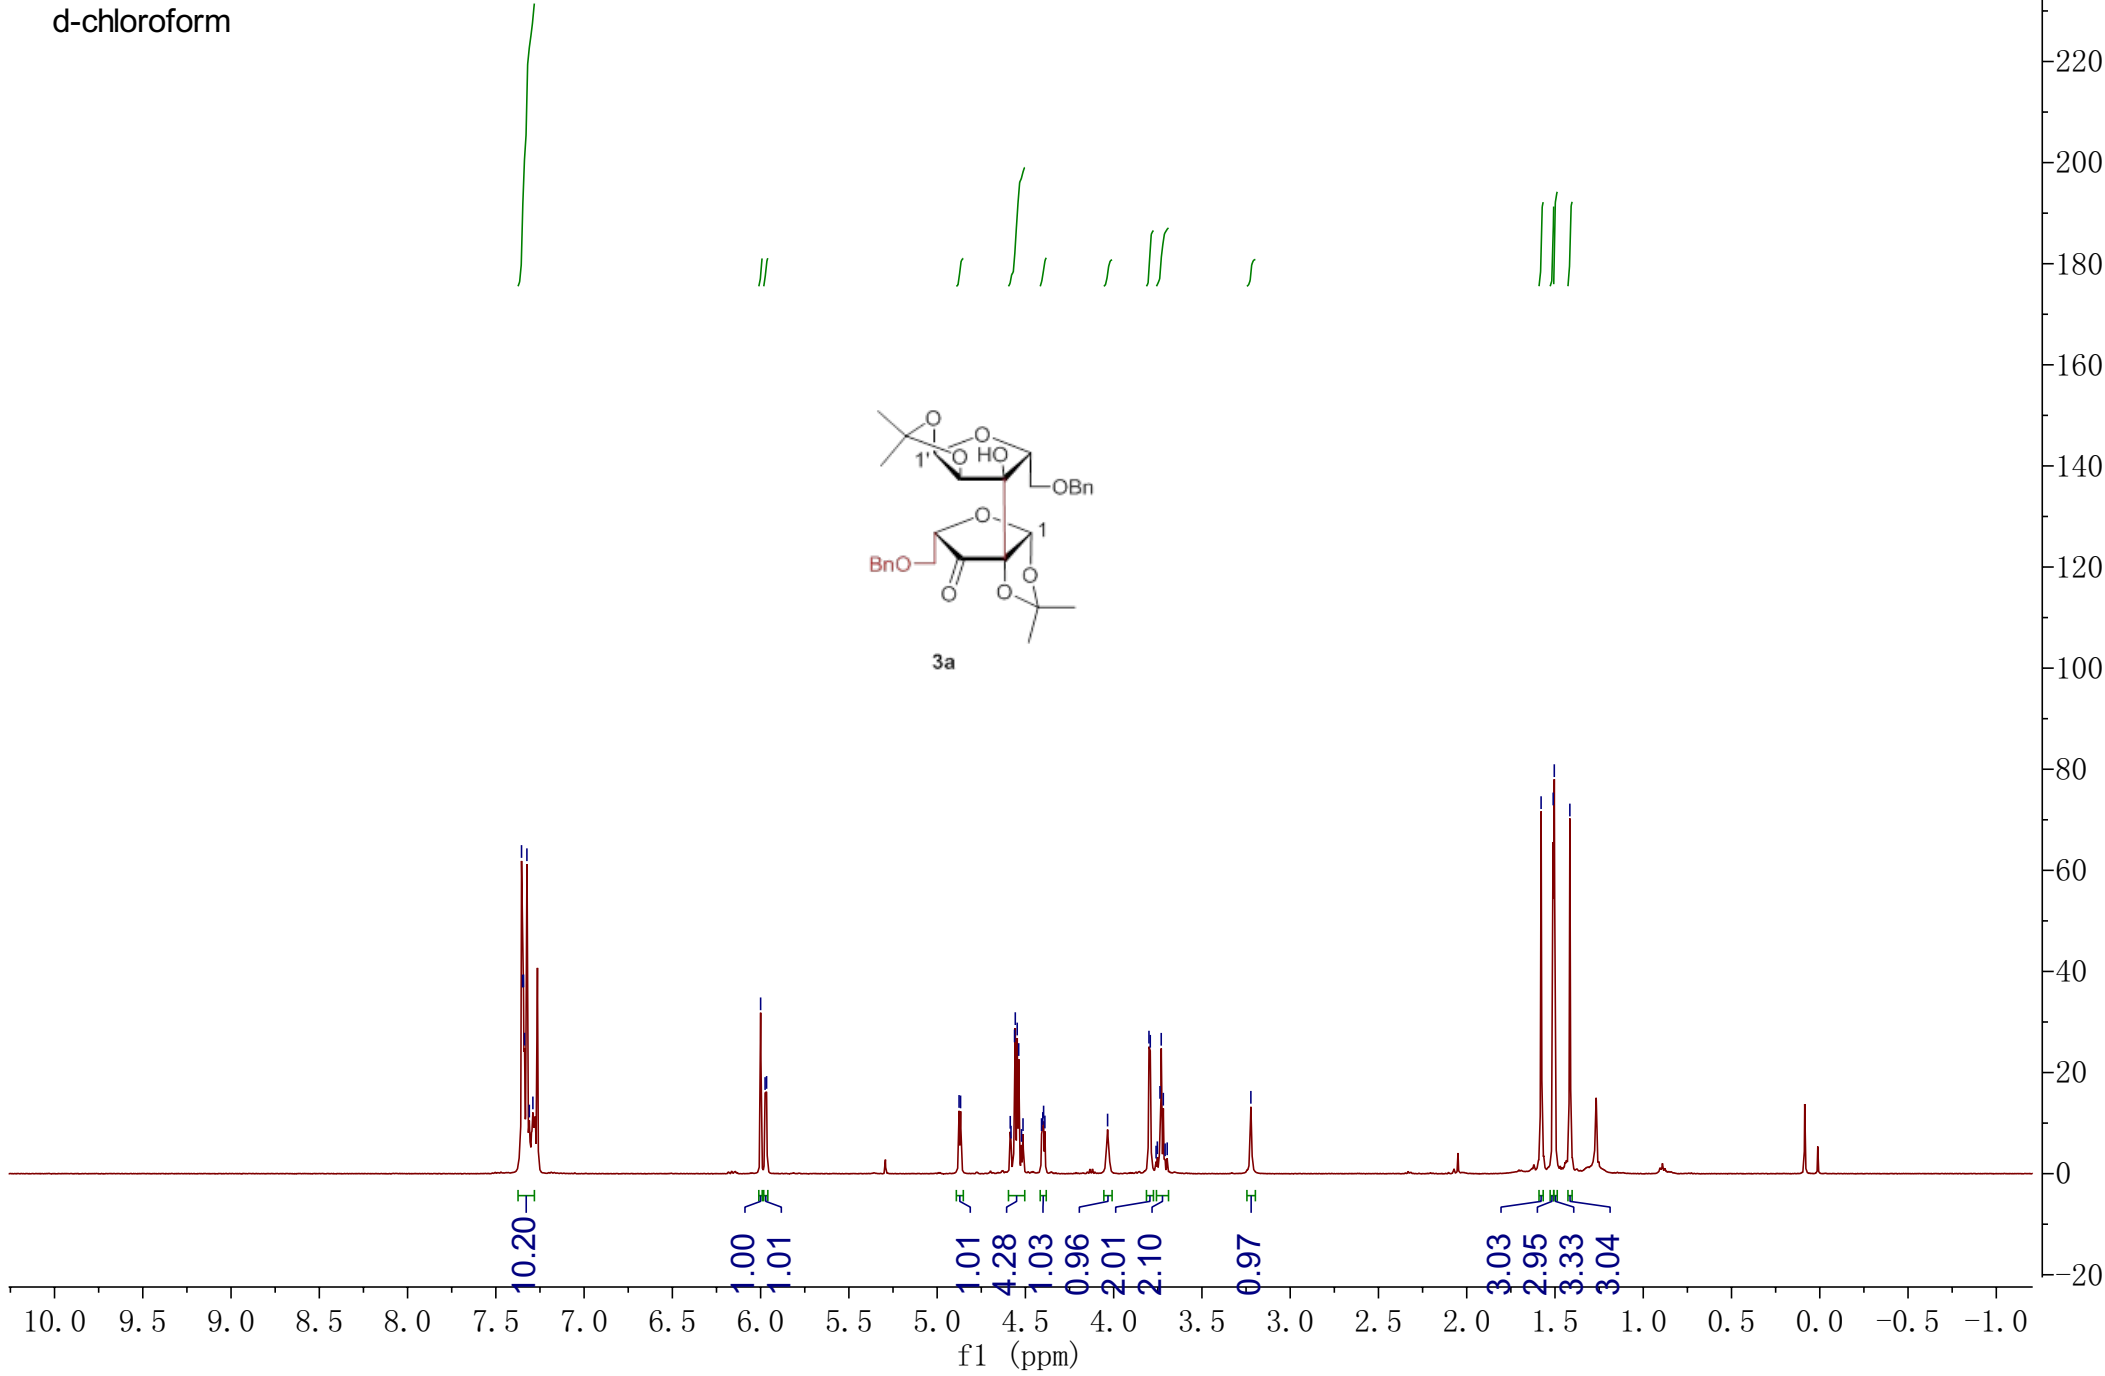

S58

d-chloroform  
—206.0

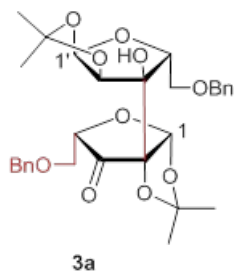

137.5  
136.8  
128.5  
128.3  
128.2  
128.0  
127.8  
127.7  
115.8  
112.8  
104.8  
104.6

86.1  
82.6  
81.8  
79.5  
79.4  
73.4  
73.3  
69.6  
66.0

28.6  
27.6  
26.6  
26.3

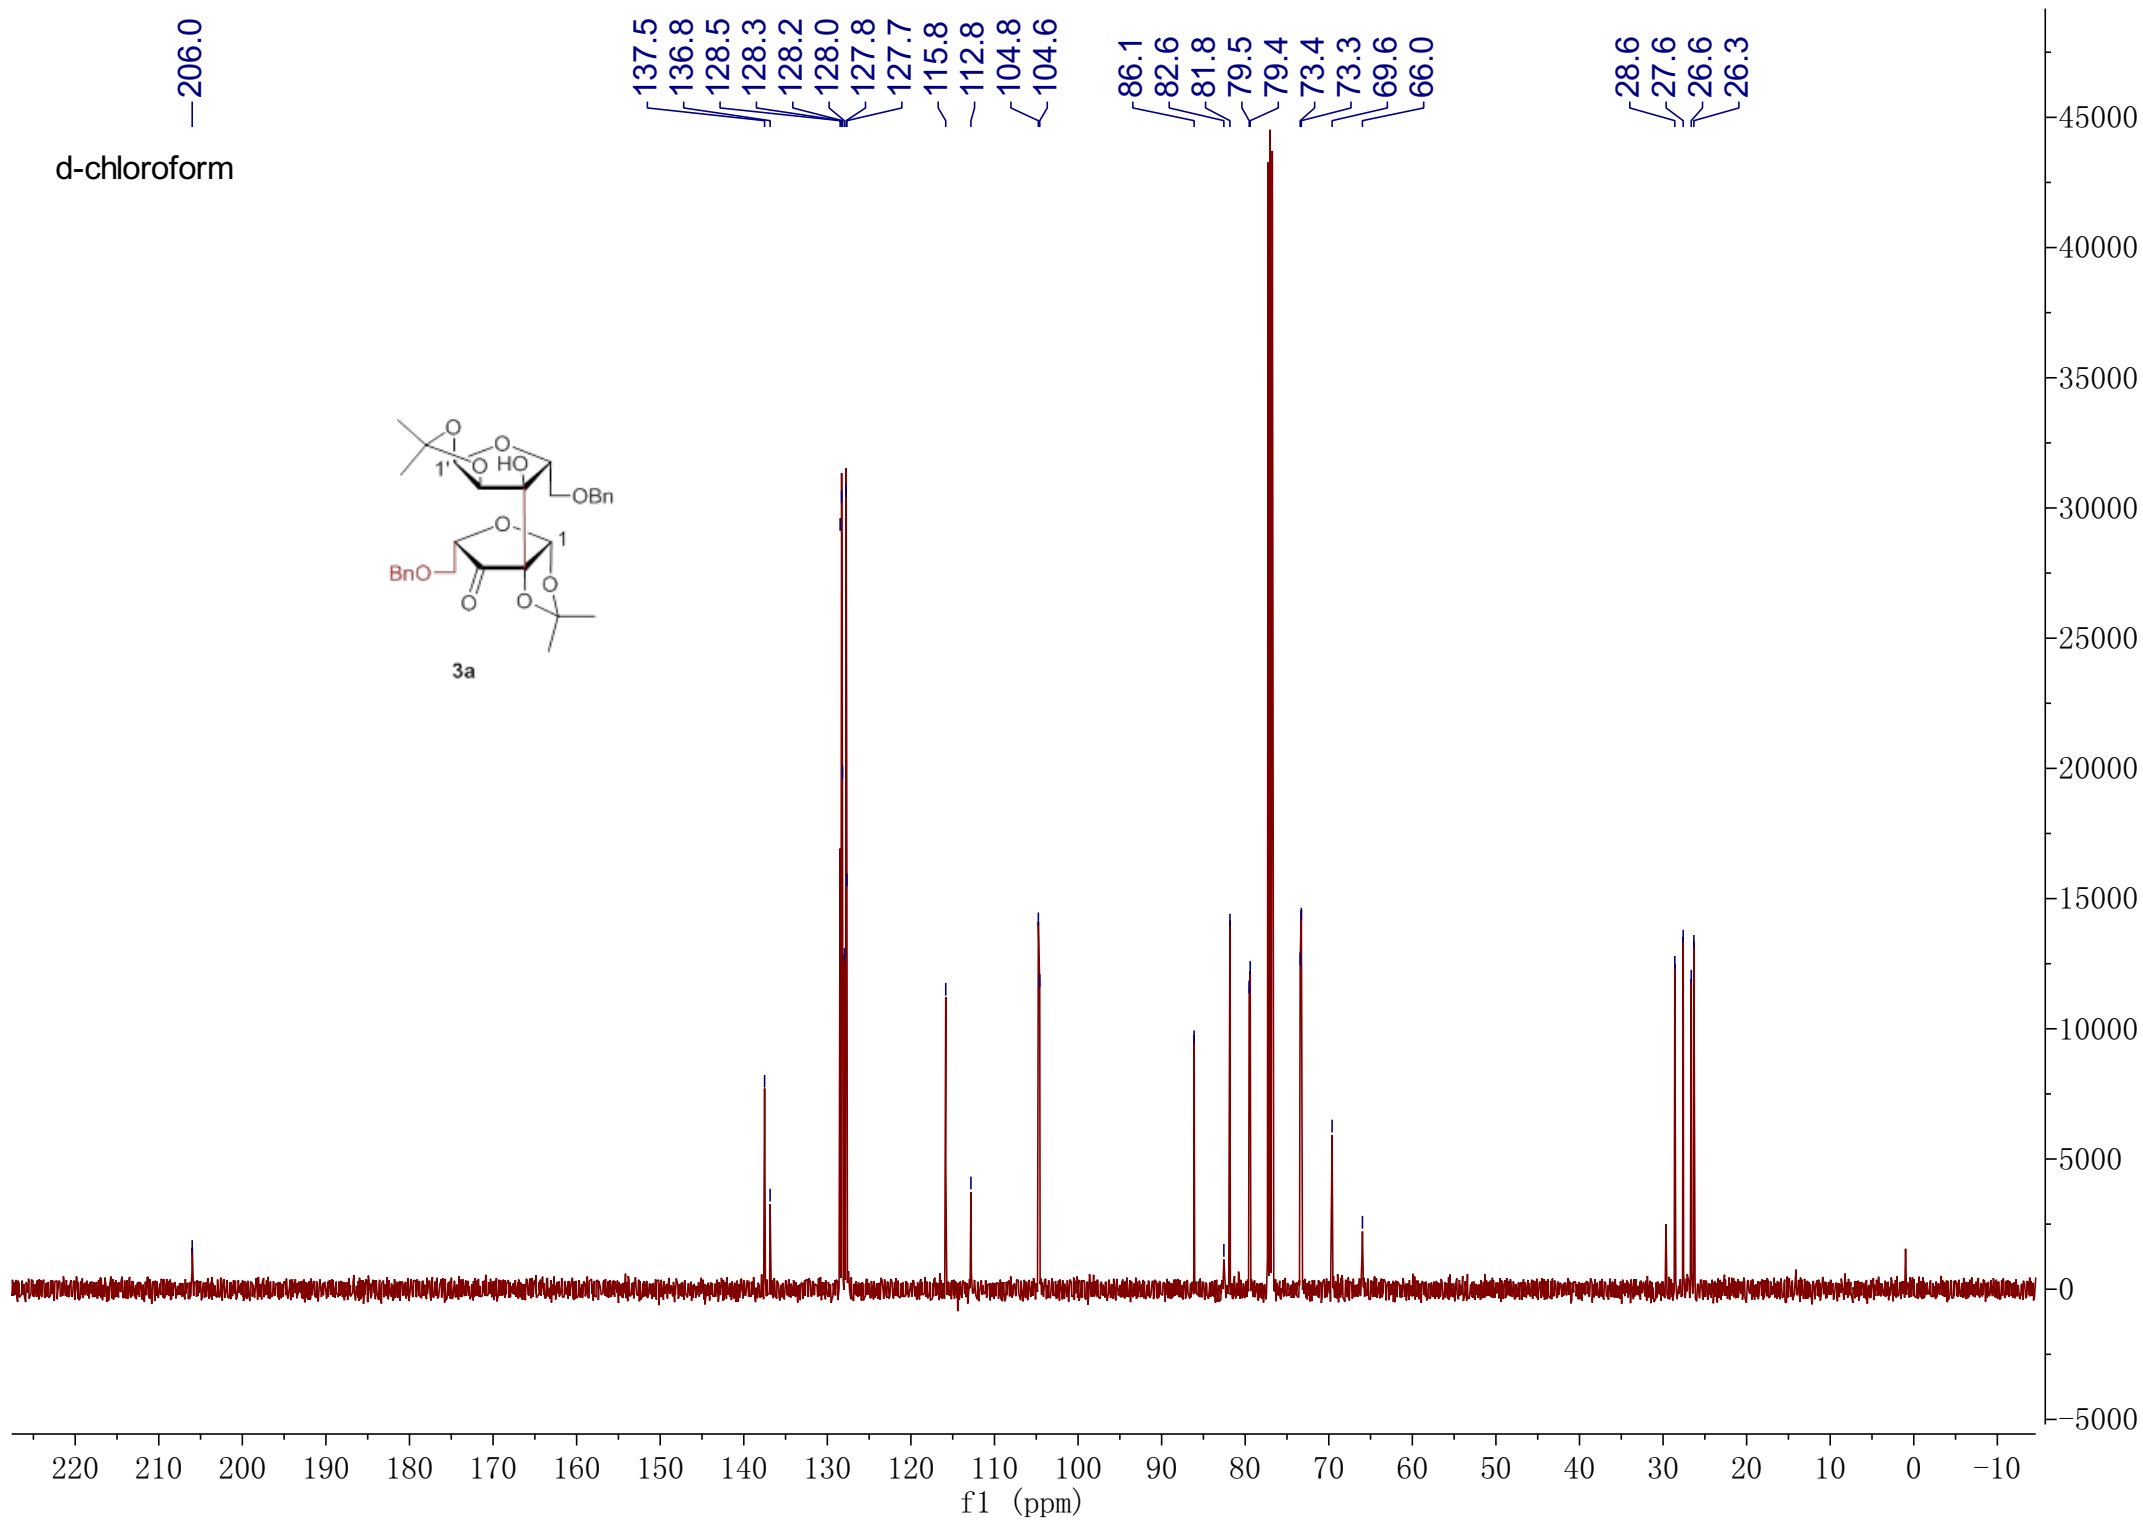

S59

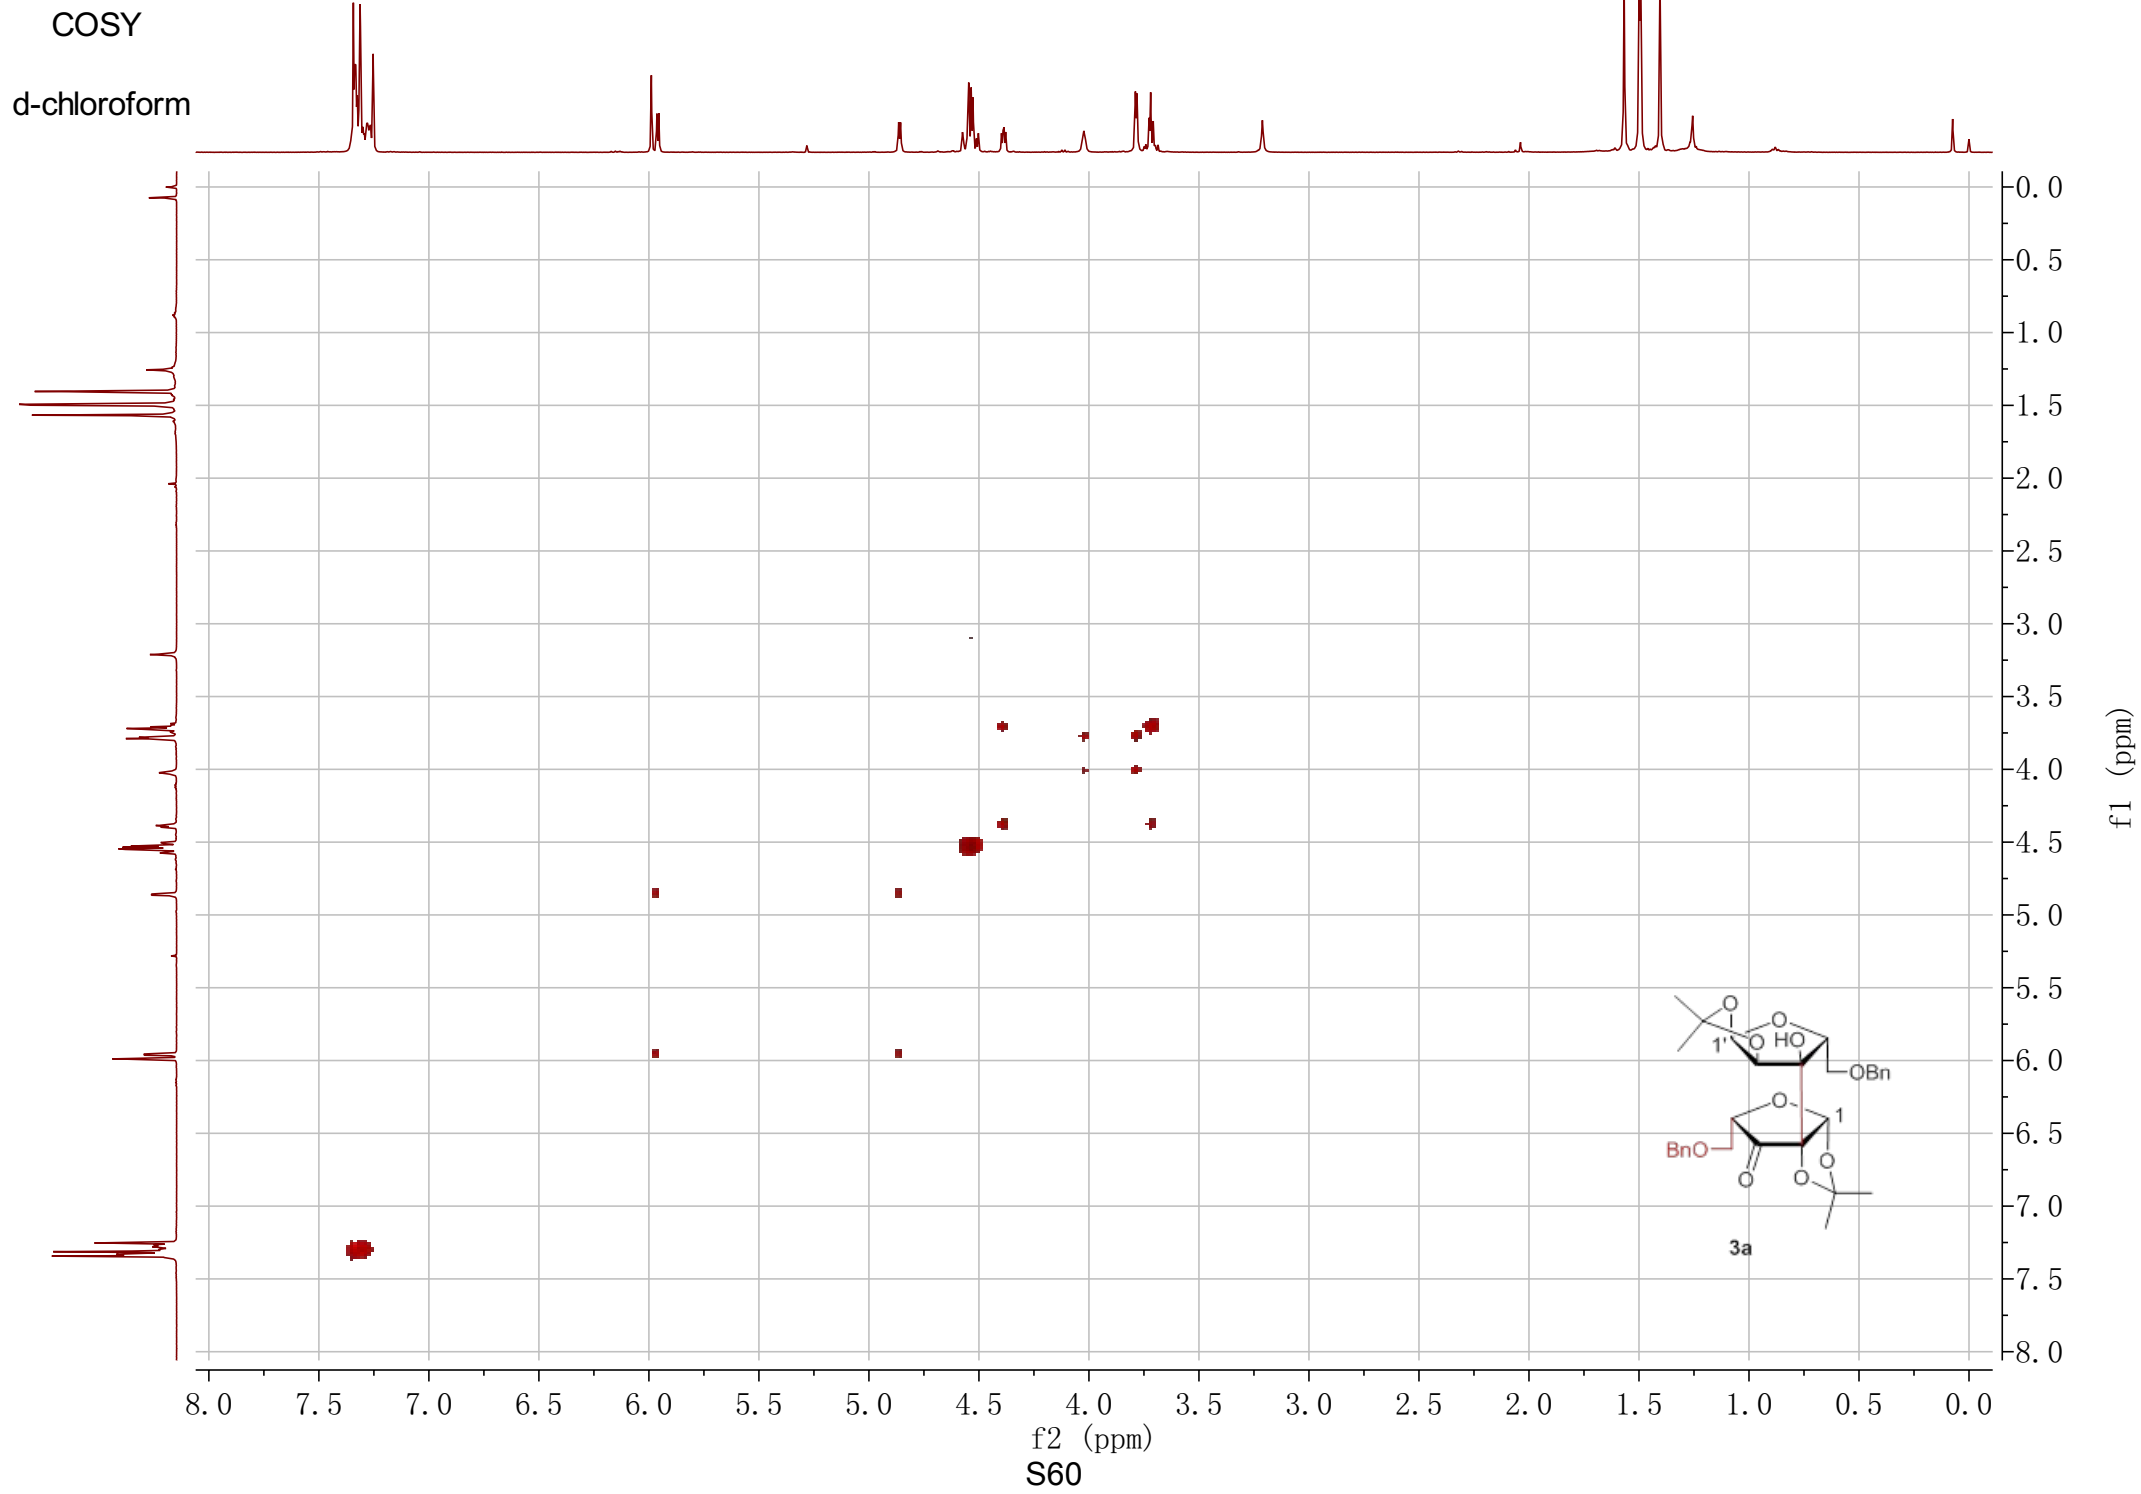

HSQC  
d-chloroform

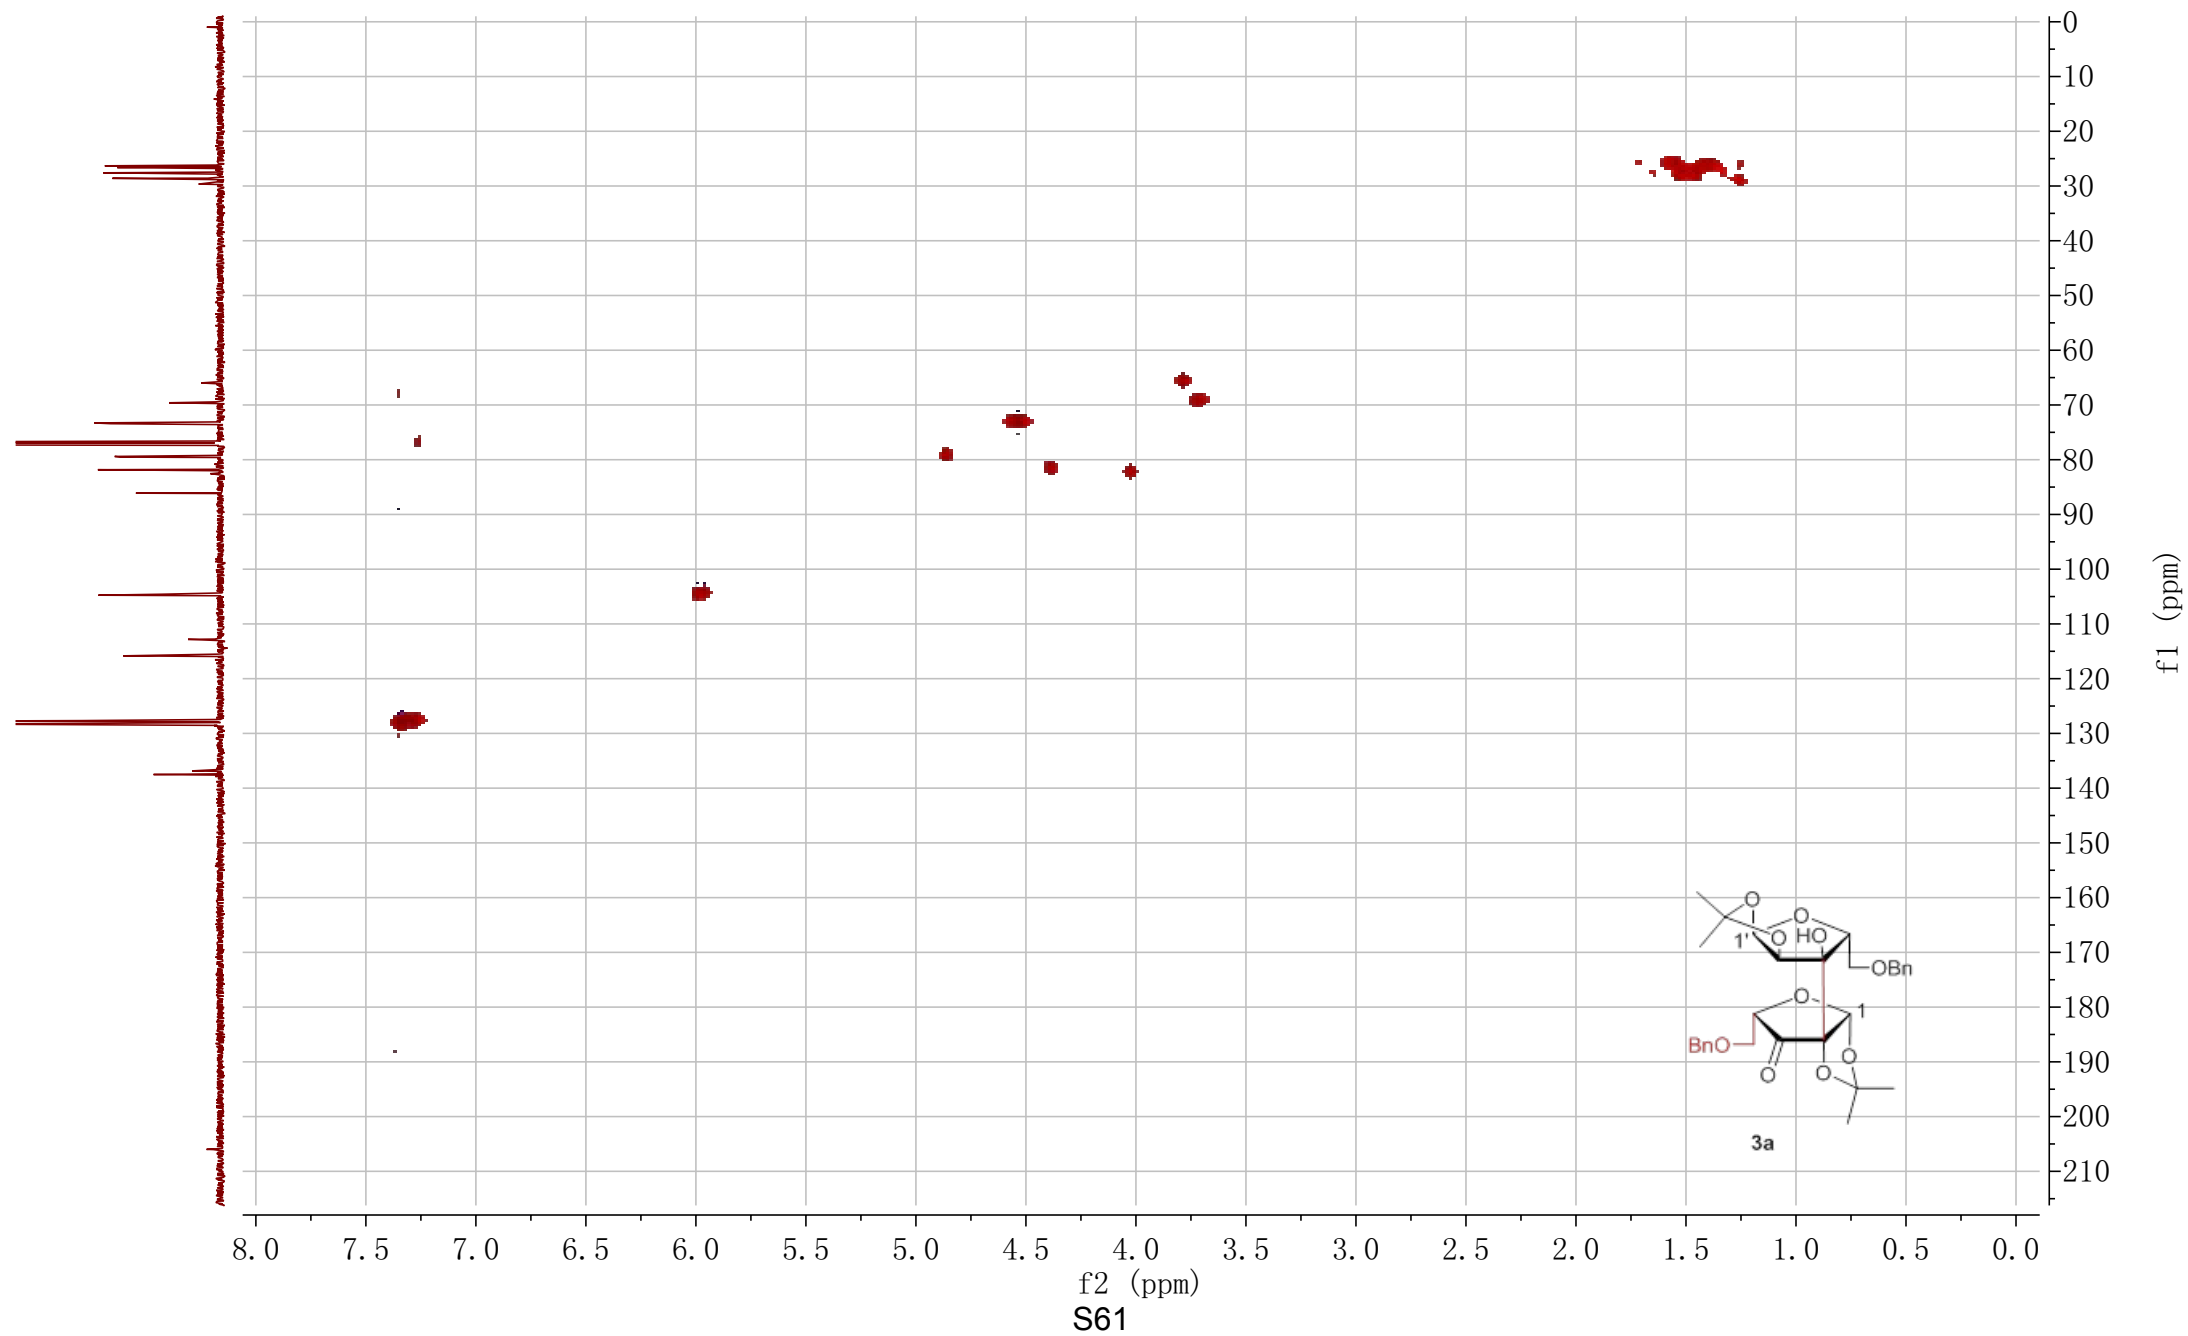

HMBC  
d-chloroform

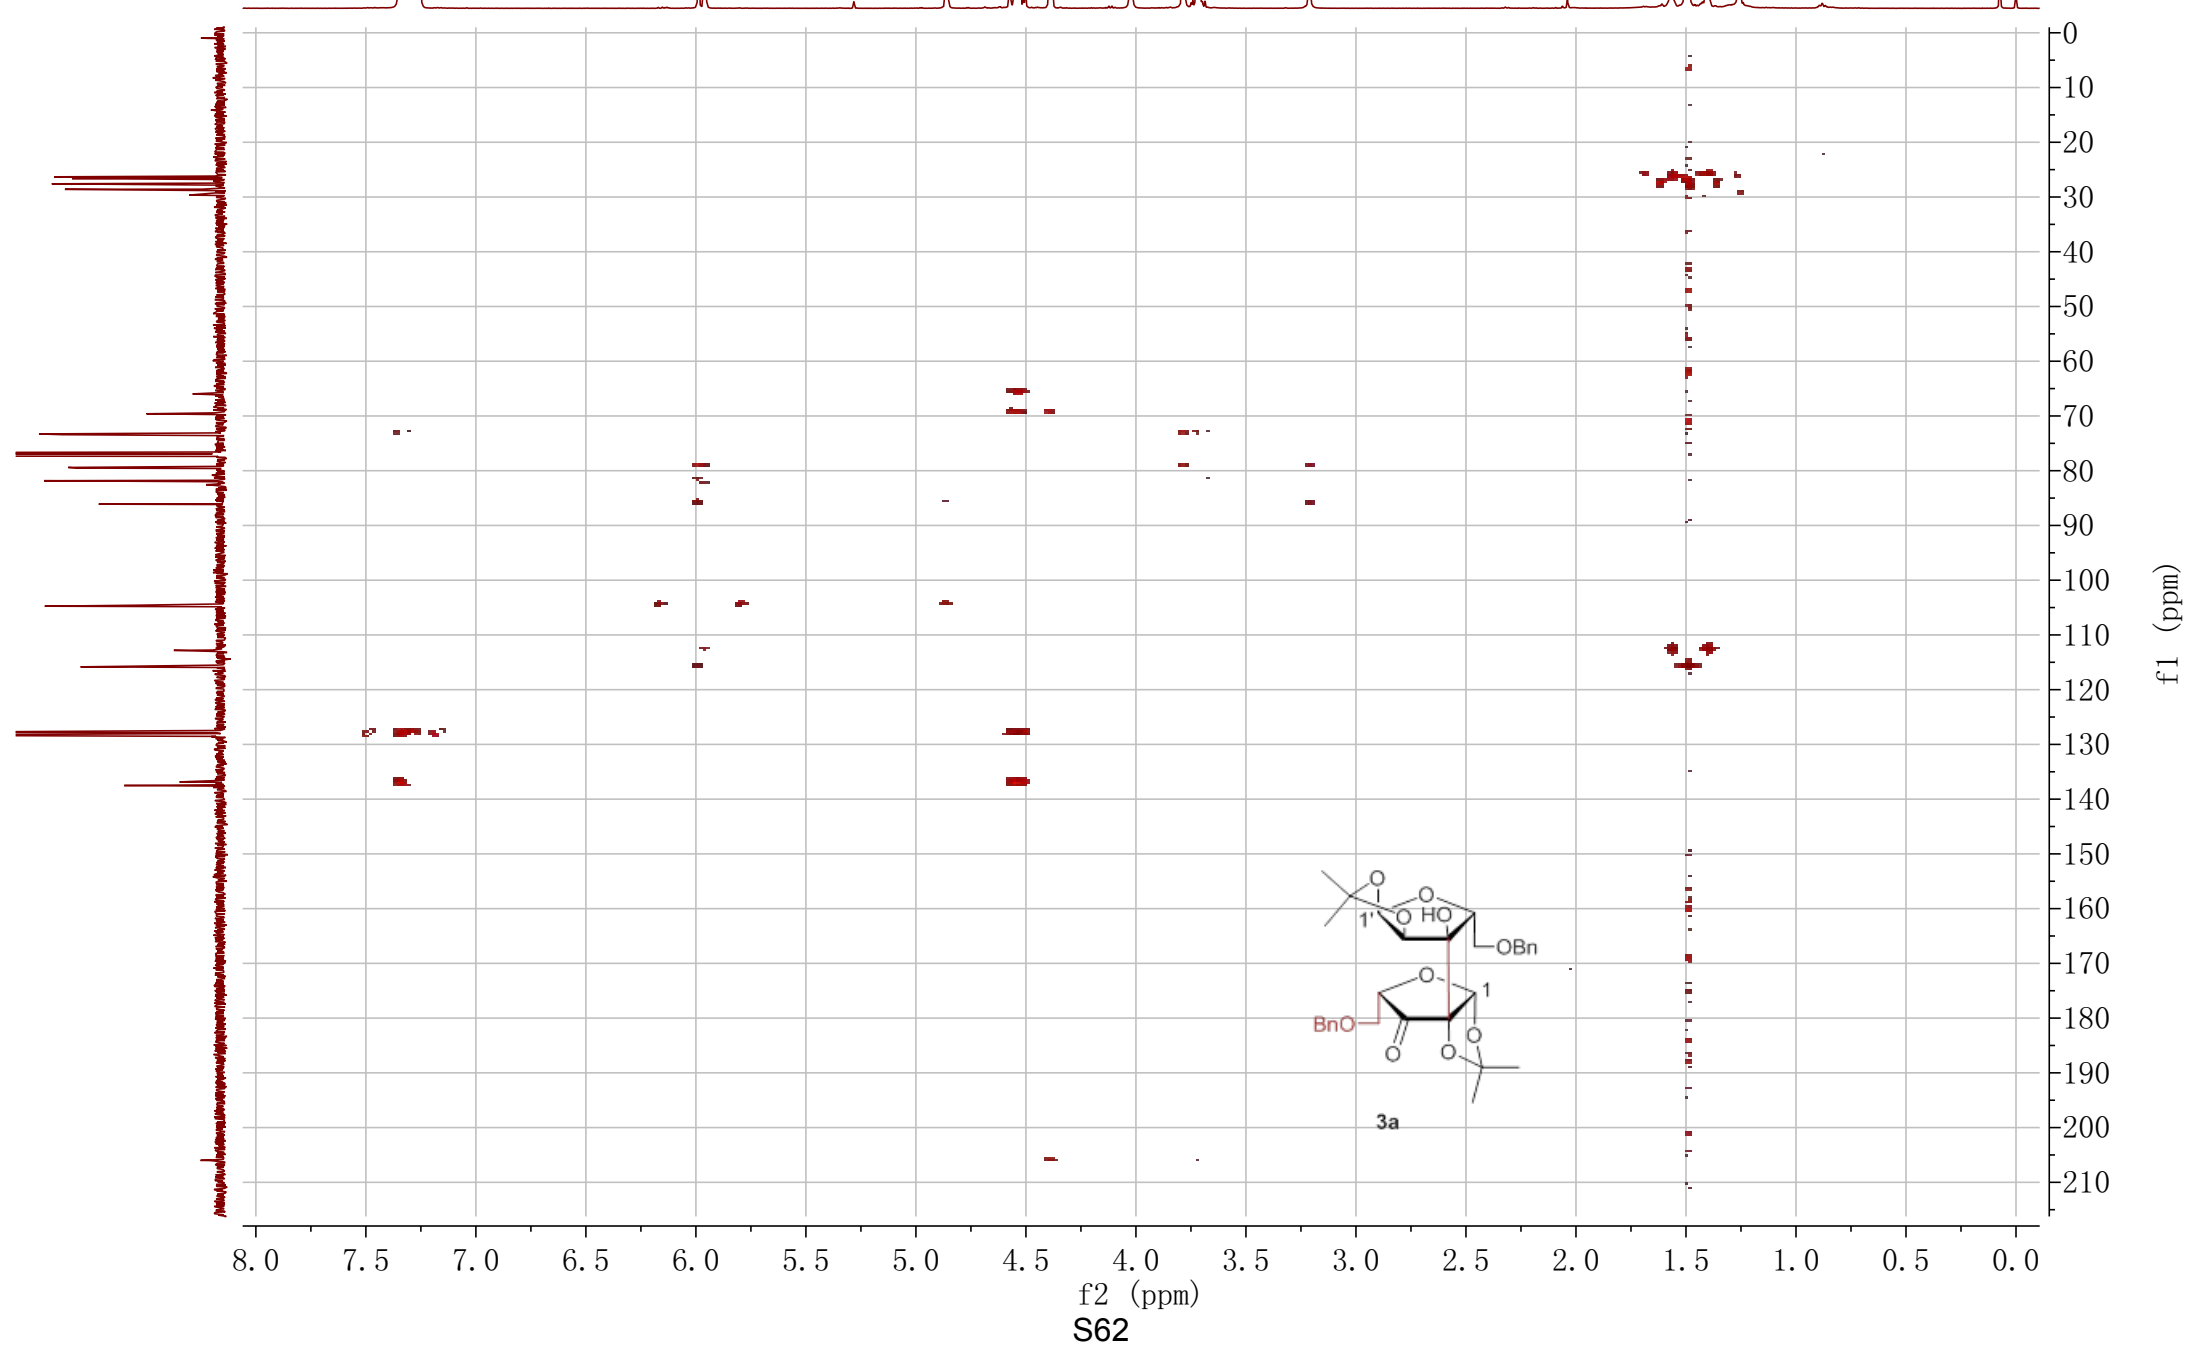

NOESY  
d-chloroform

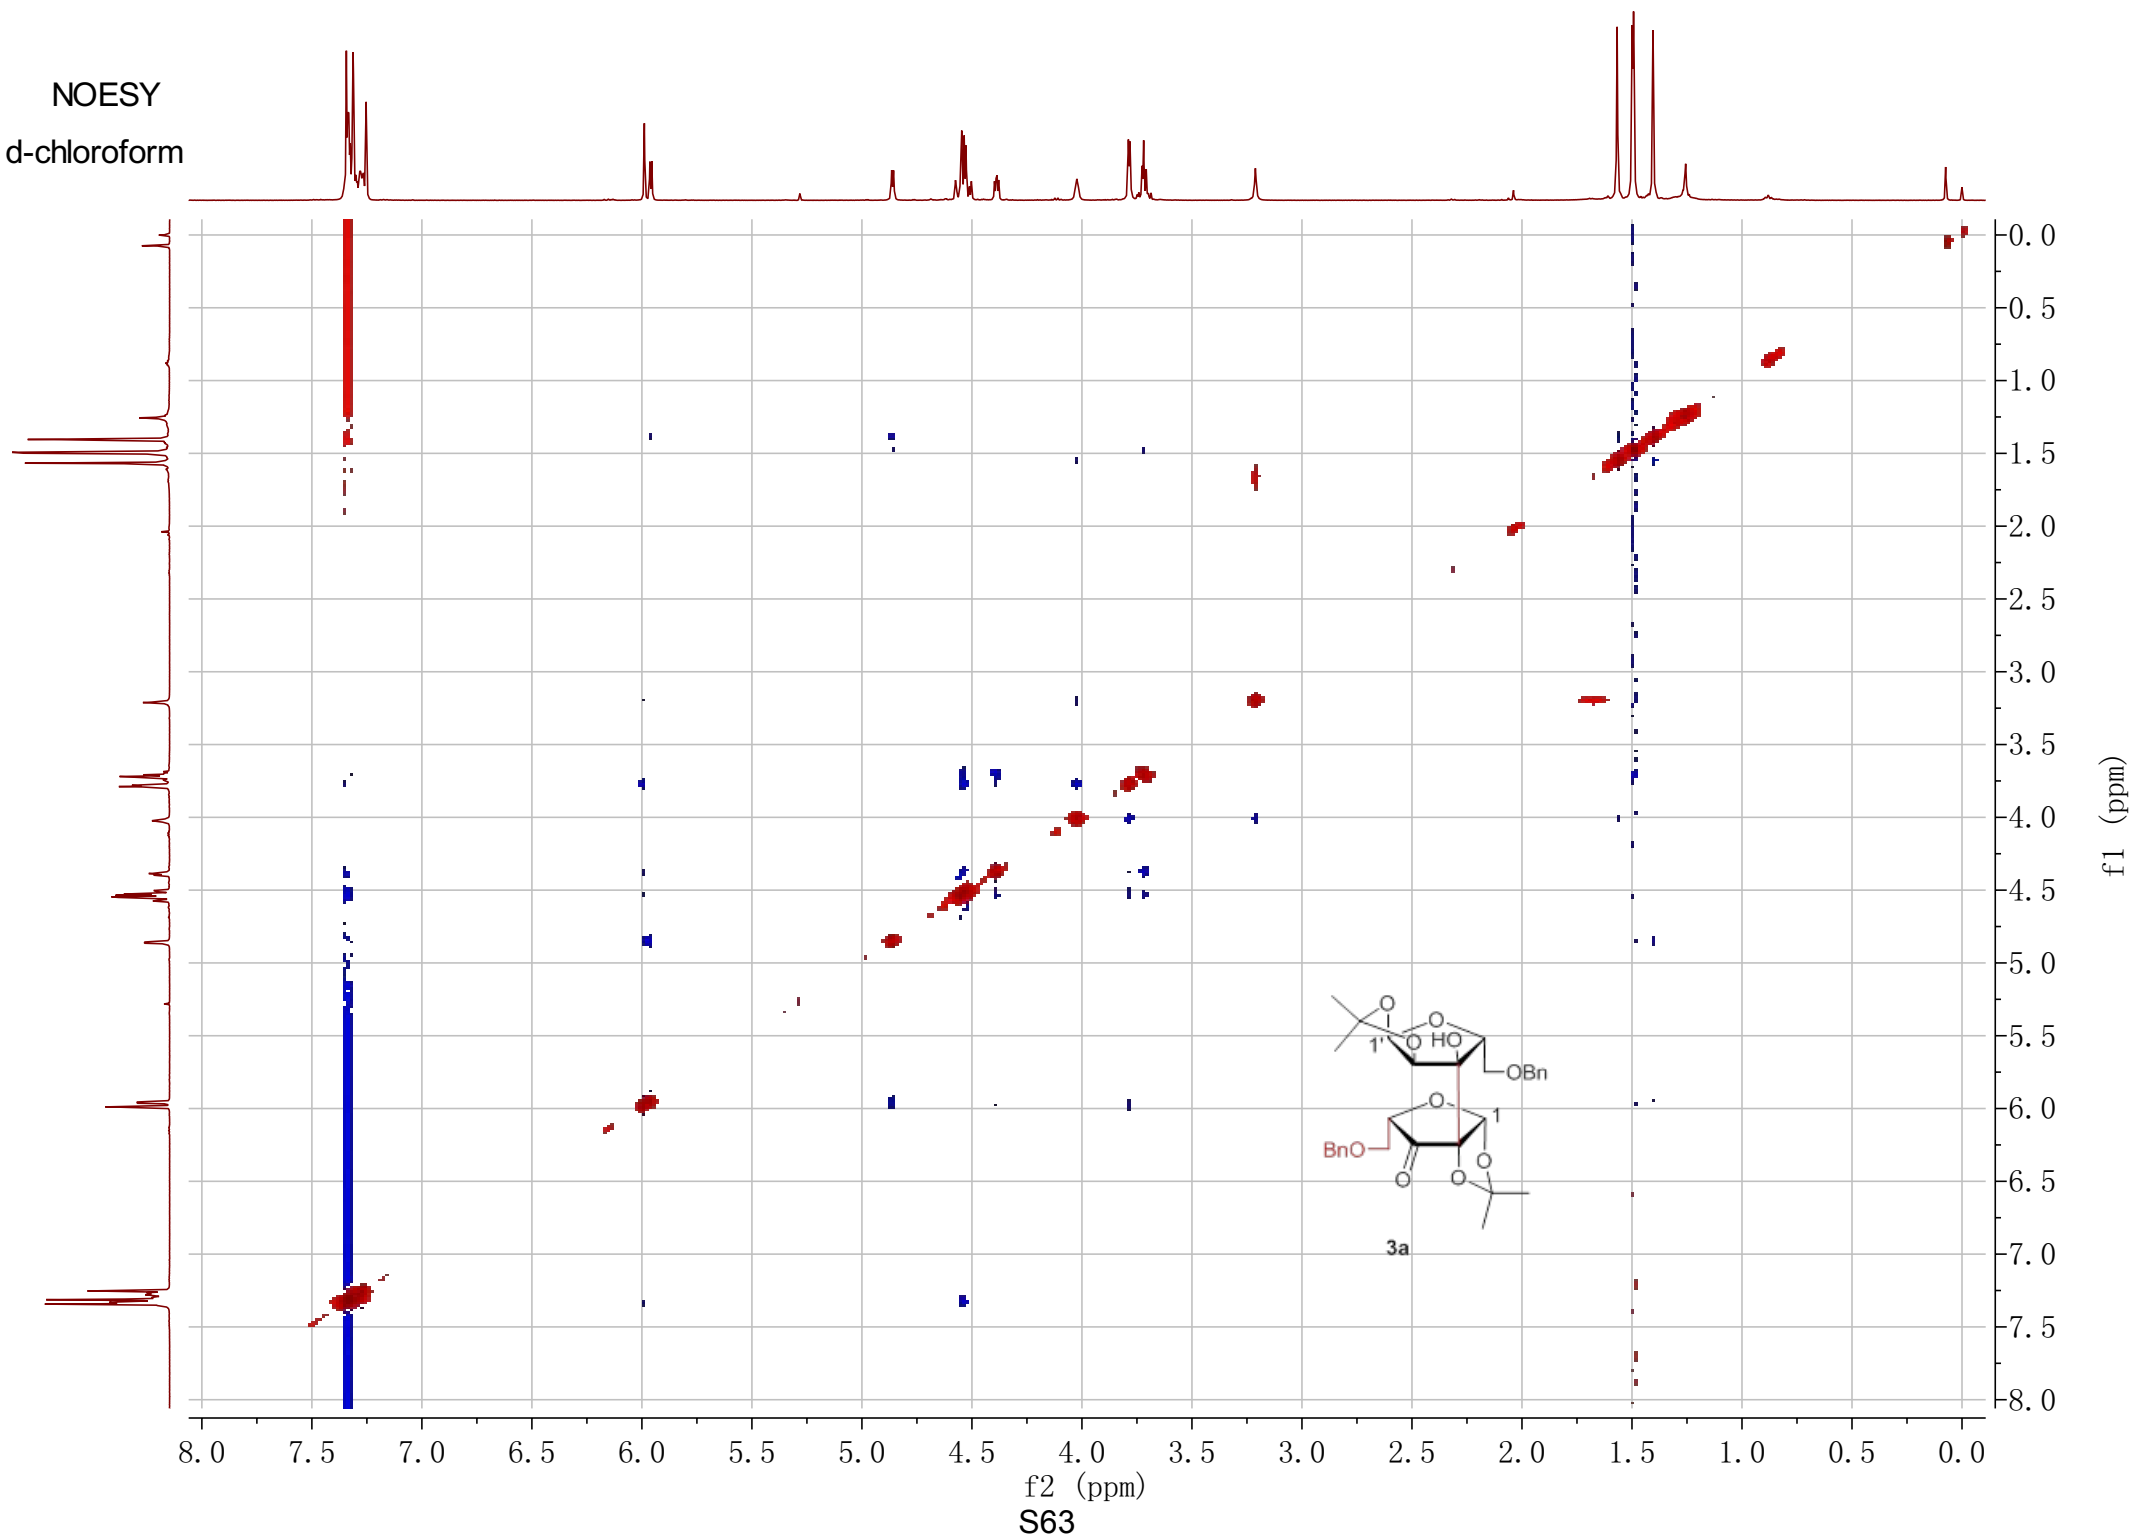

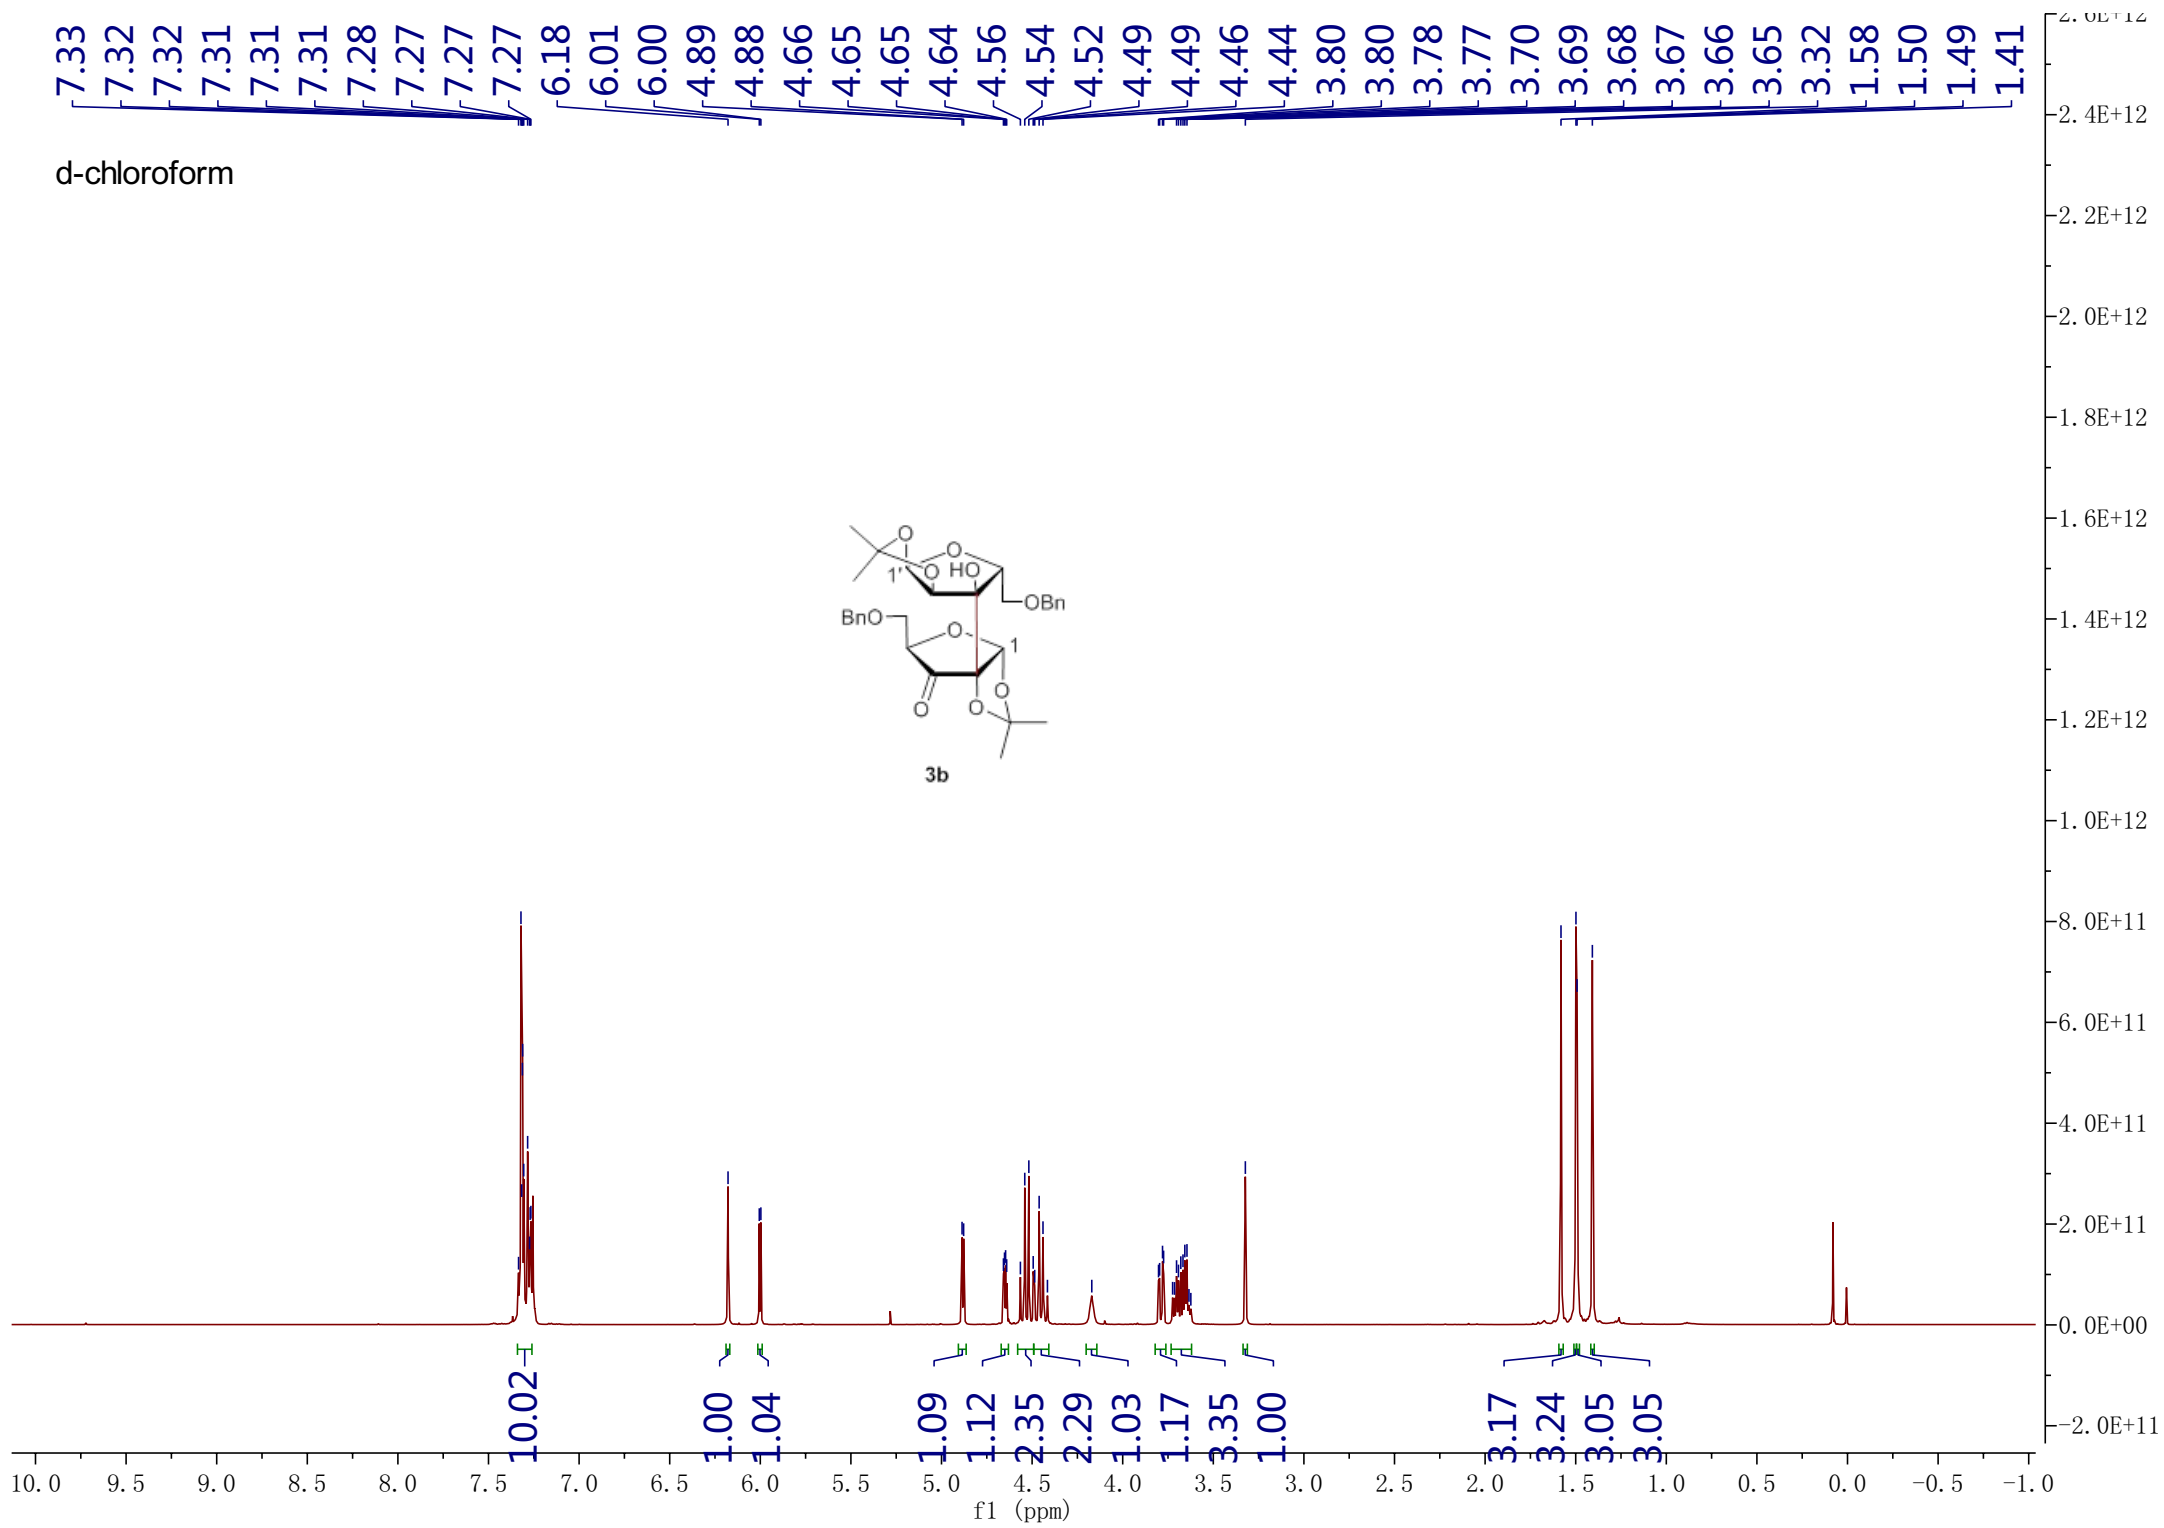



d-chloroform  
—206.4

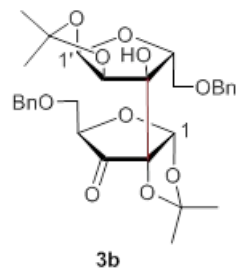

137.5  
137.4  
128.4  
127.9  
127.8  
127.8  
127.7  
115.0  
113.0  
104.9  
104.7  
85.6  
82.8  
80.1  
79.6  
79.2  
73.5  
73.2  
68.4  
67.2  
28.3  
28.0  
26.8  
26.4

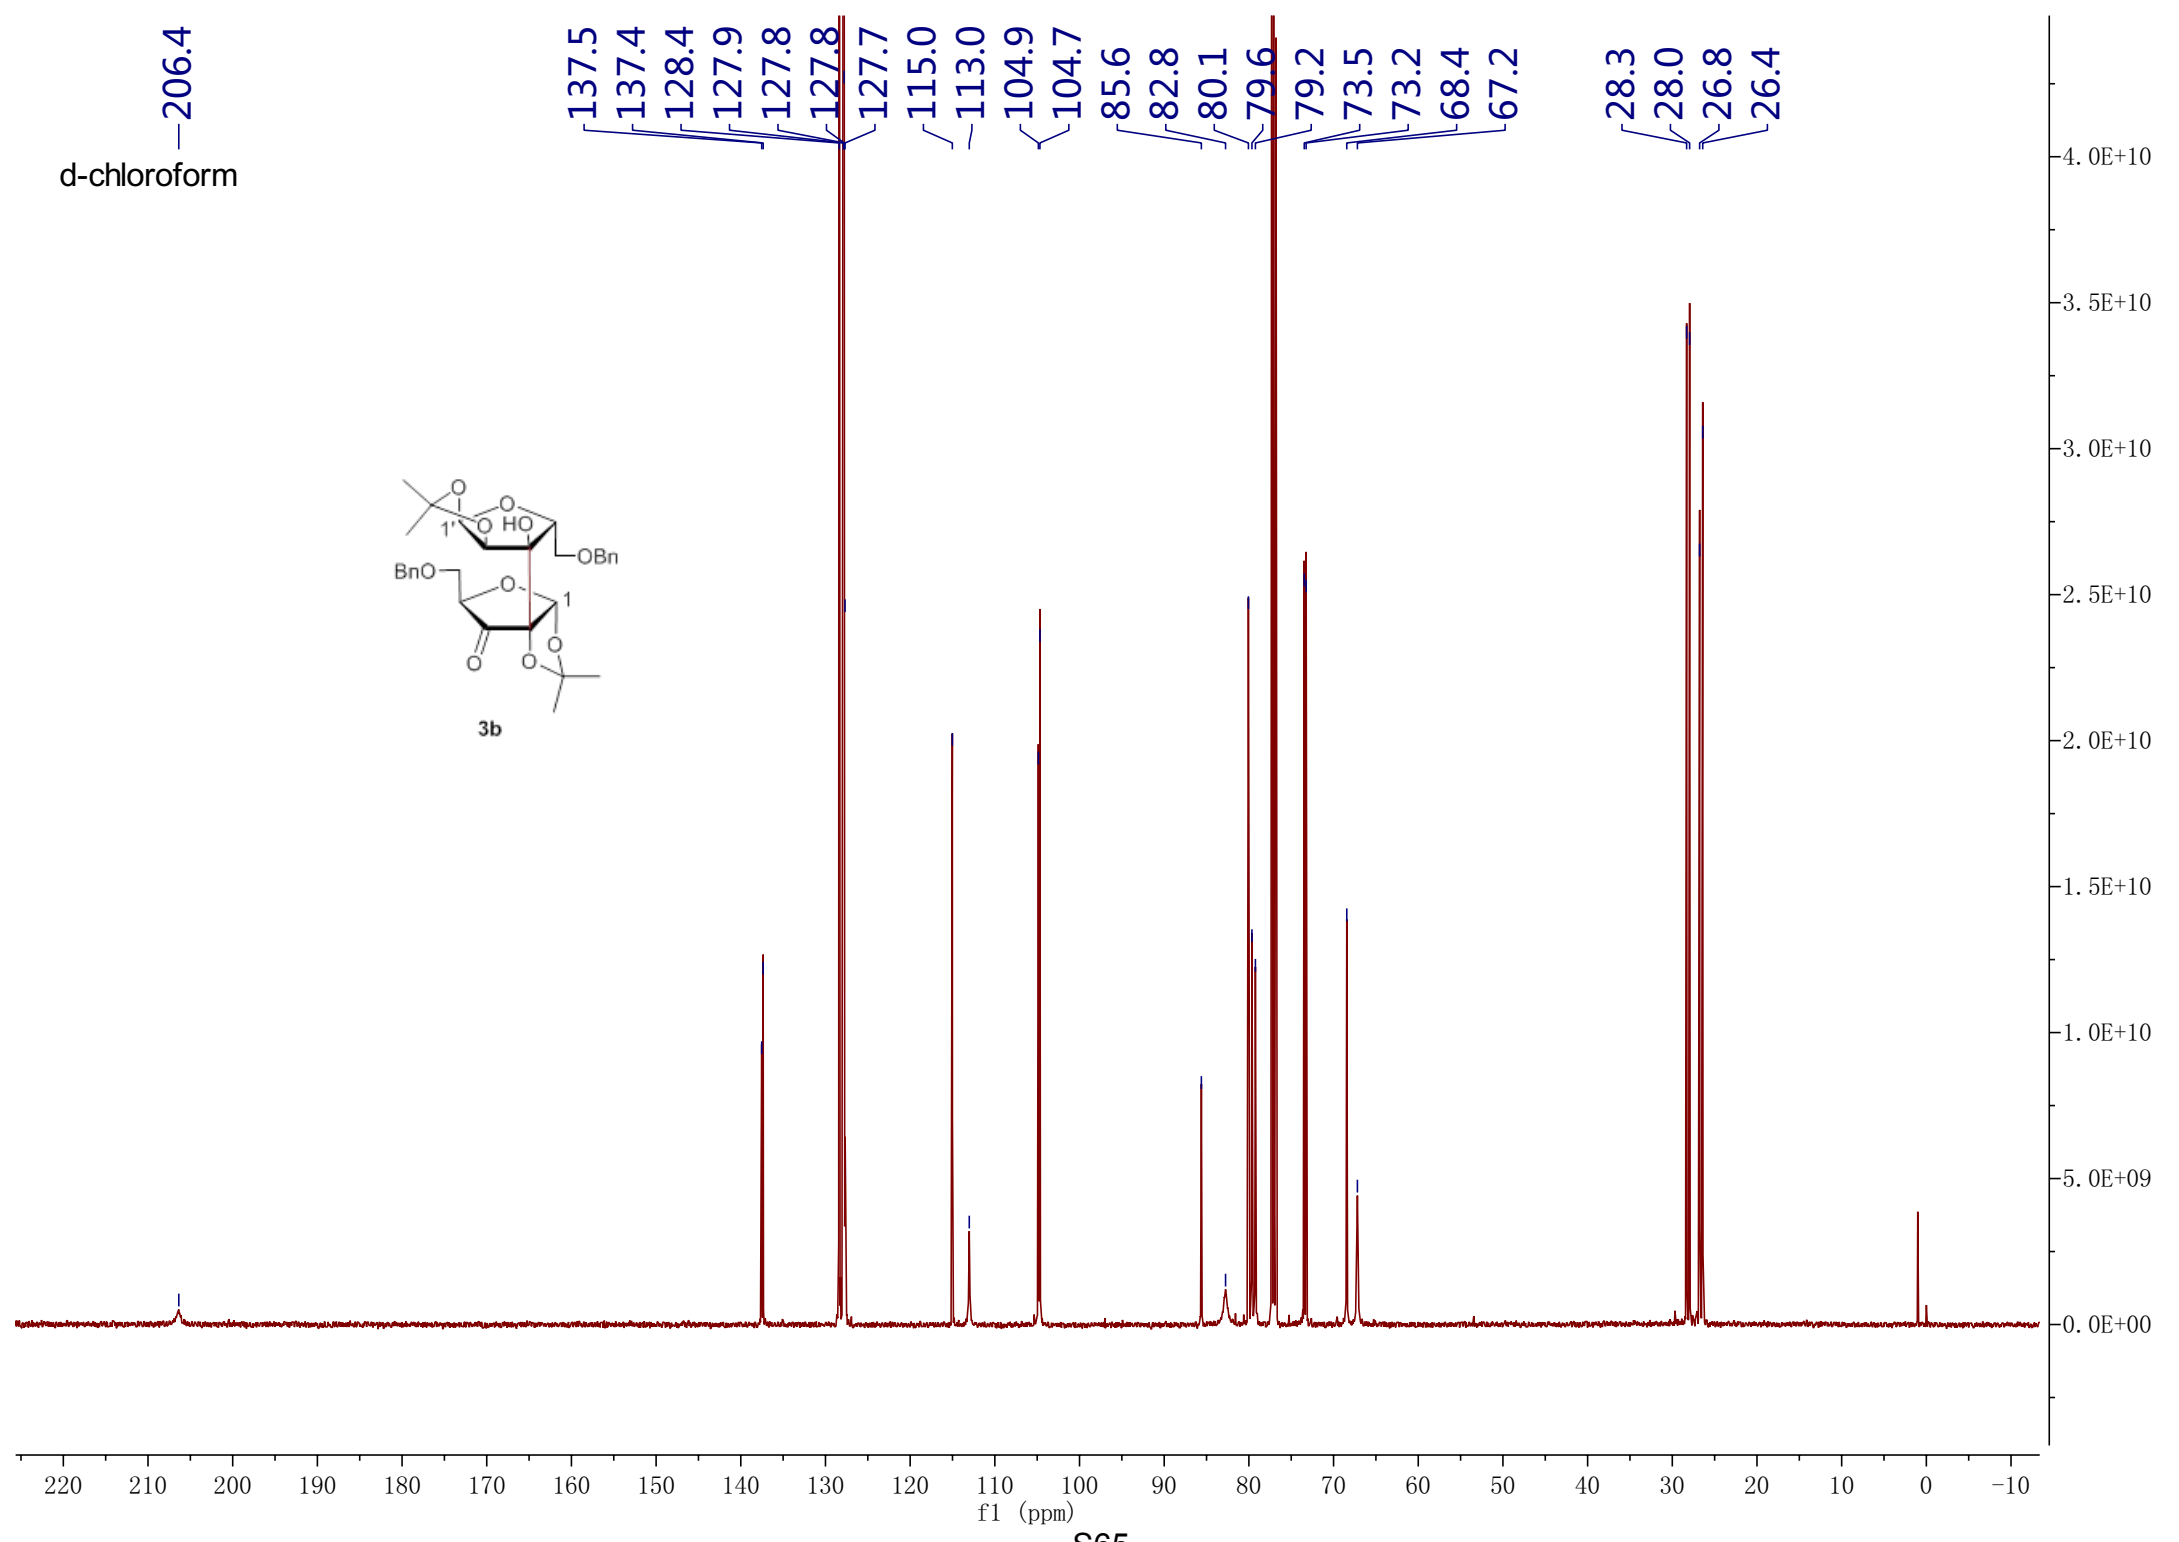

COSY  
d-chloroform

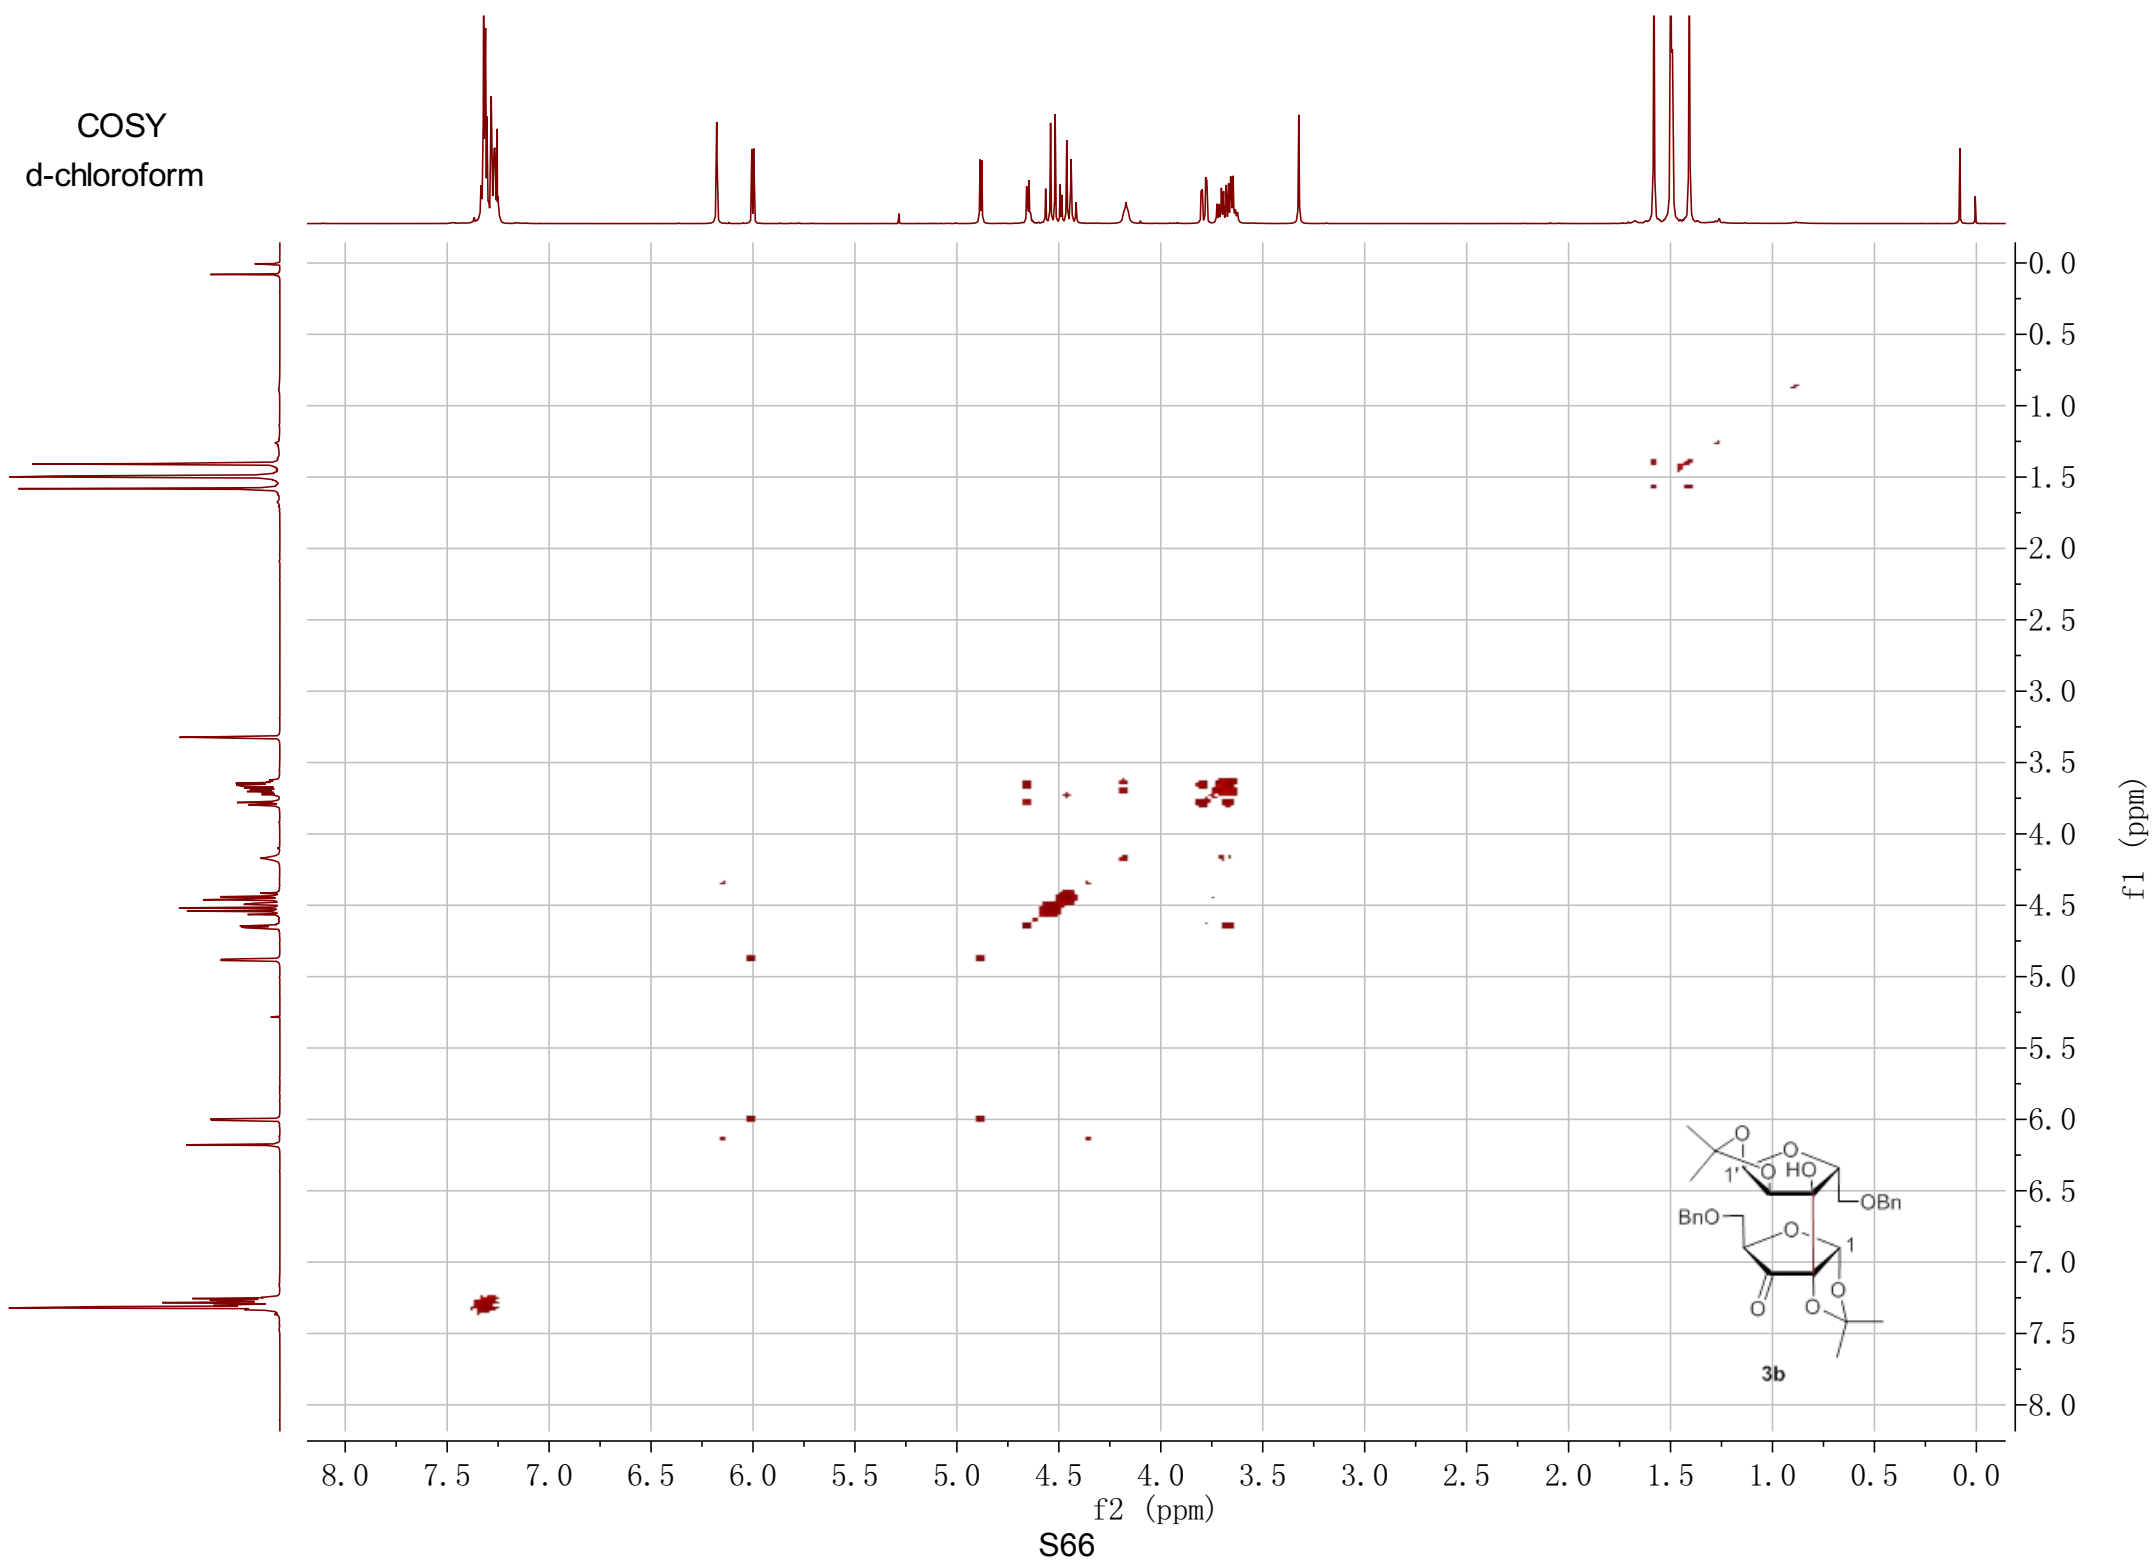

HSQC  
d-chloroform

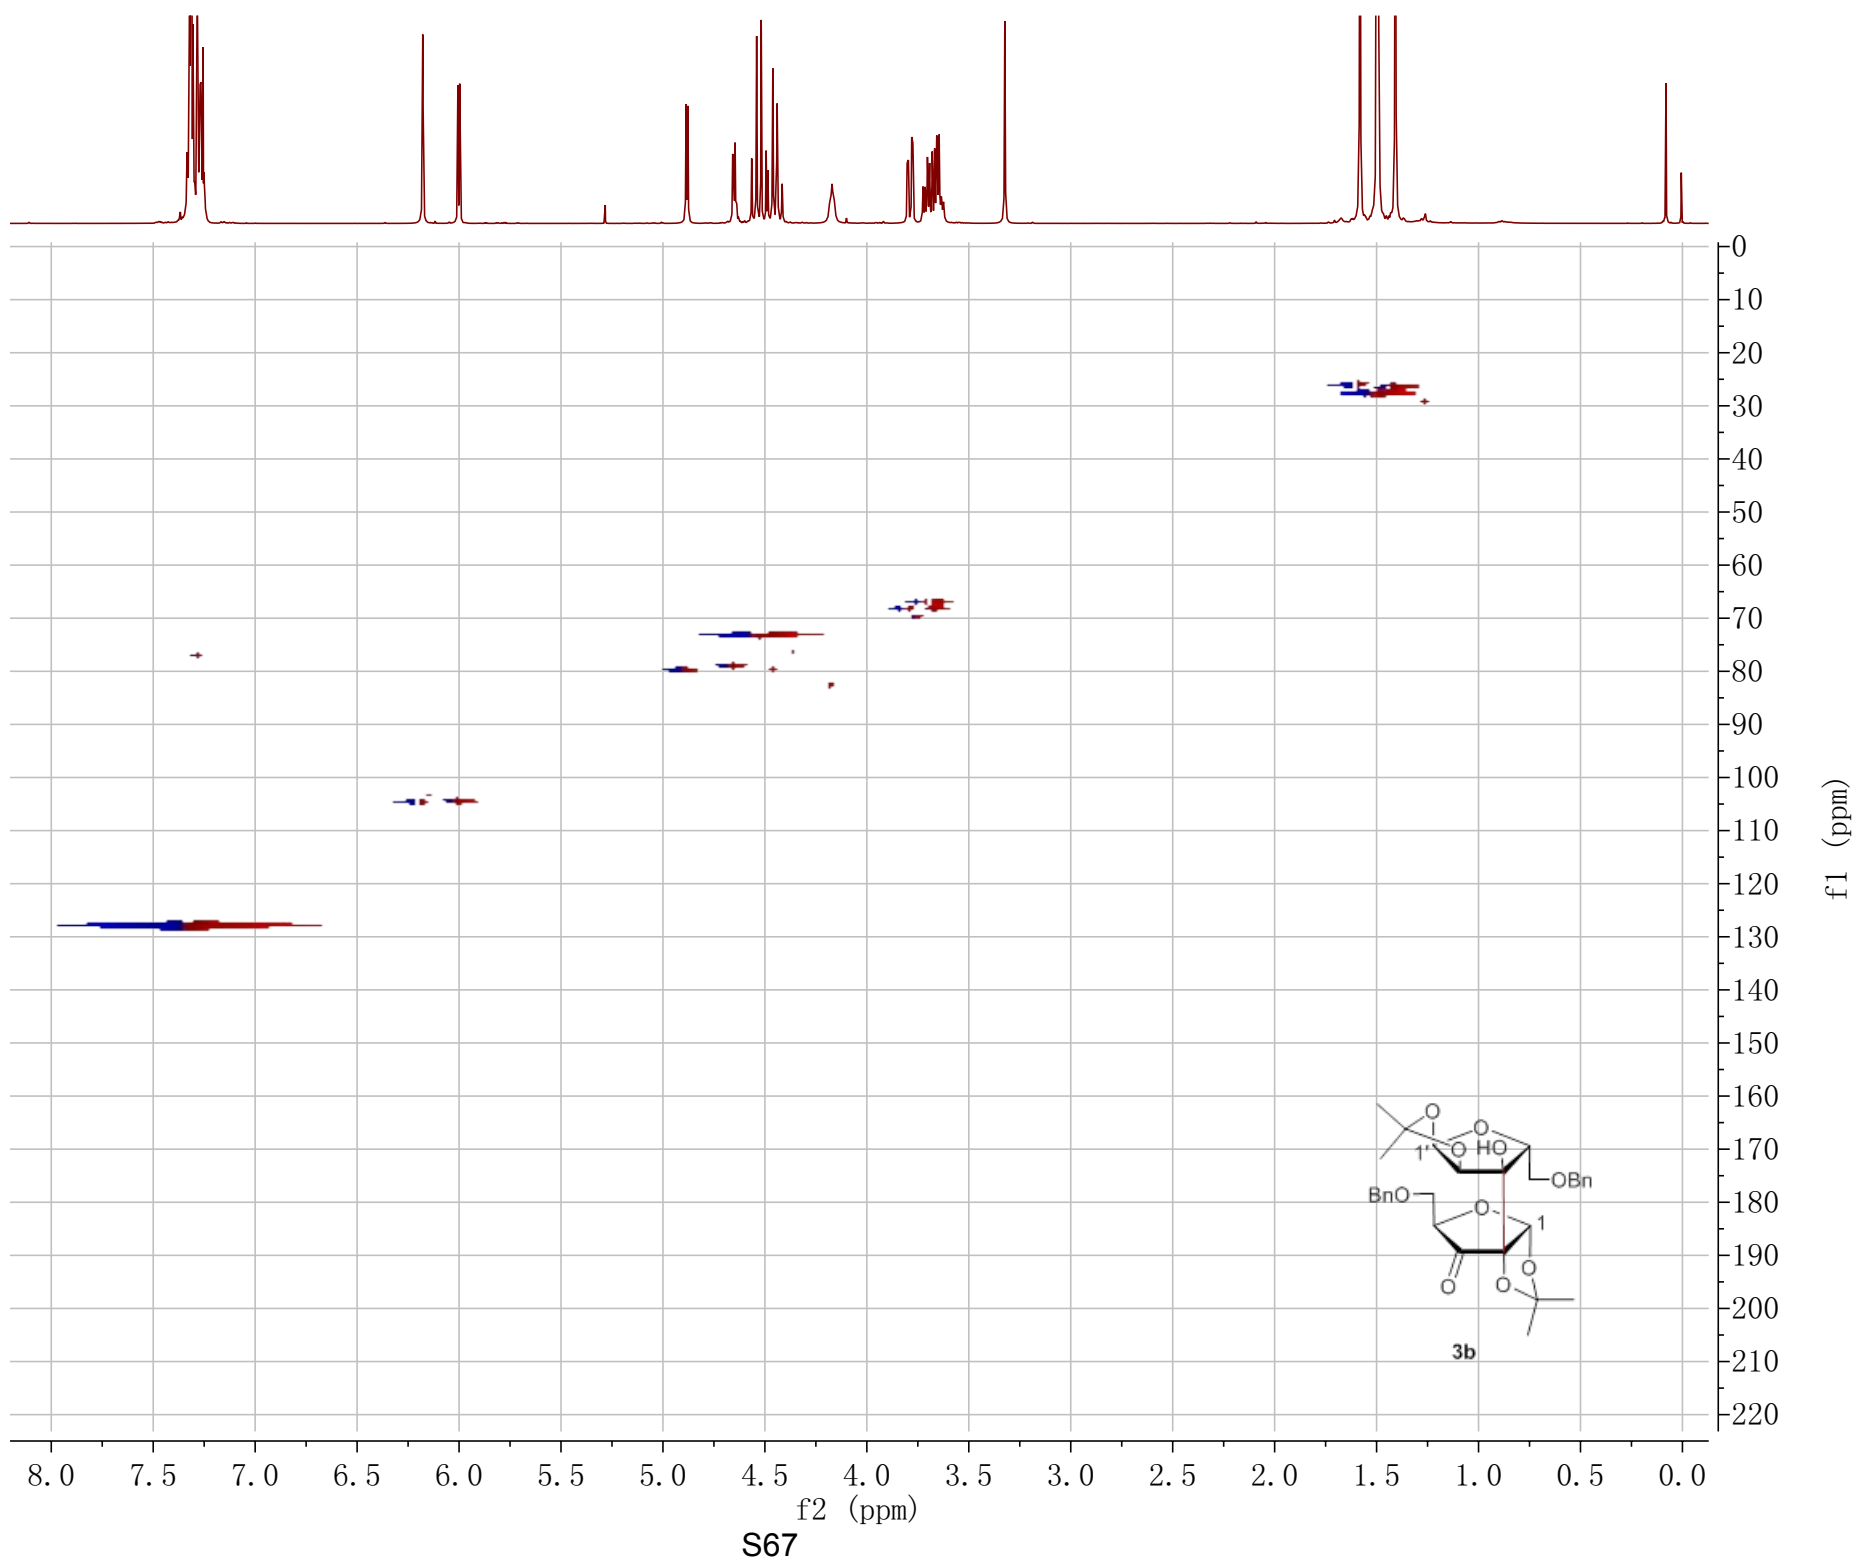

HMBC  
d-chloroform

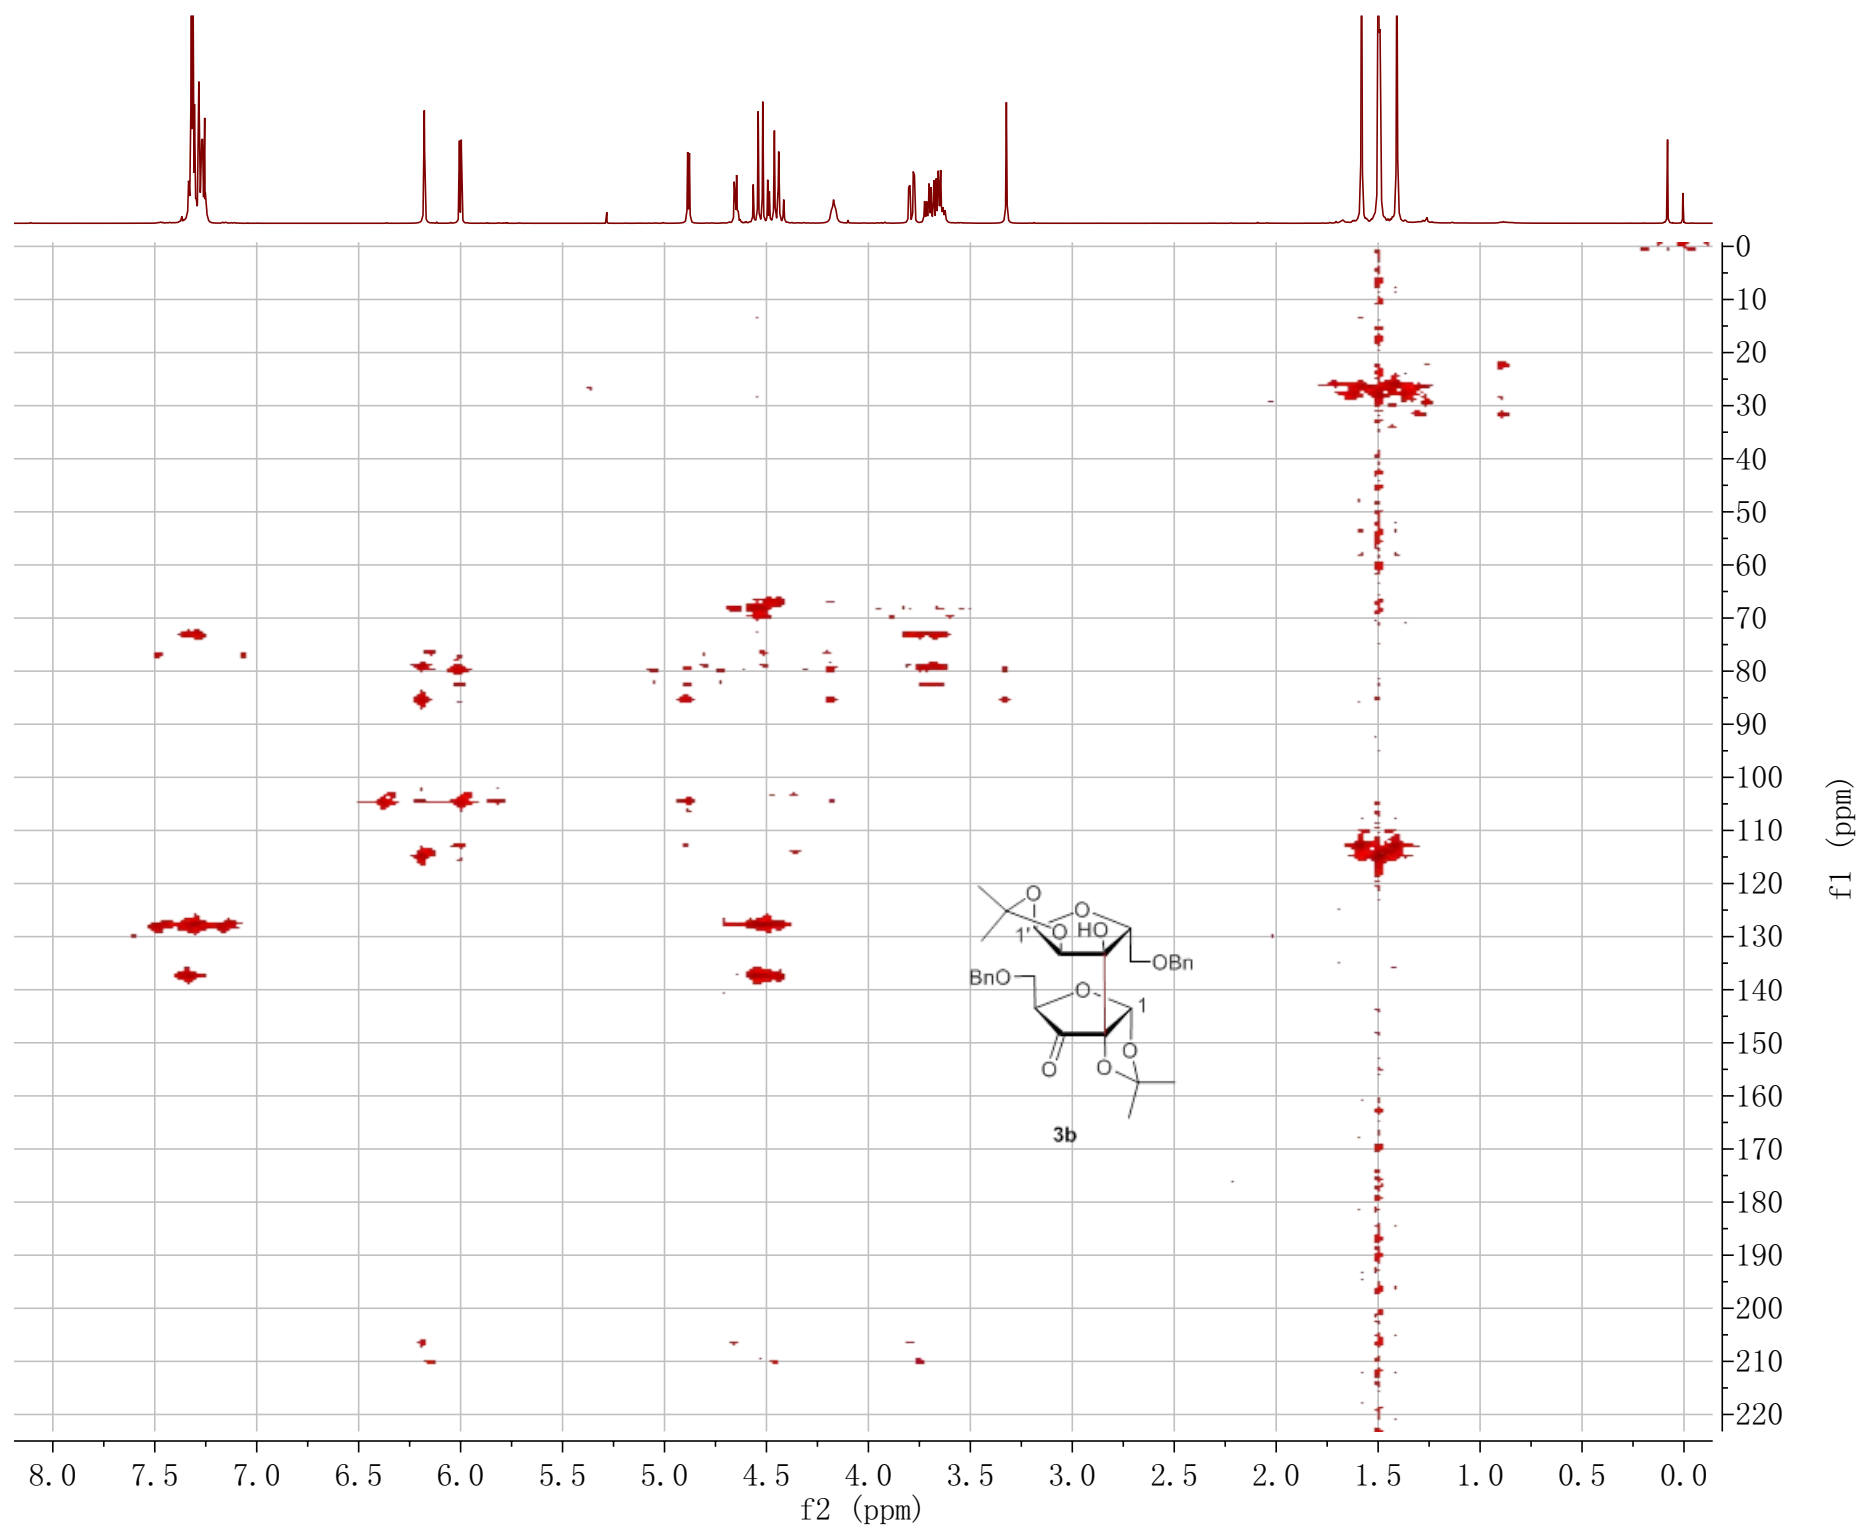

S68

NOESY  
d-chloroform

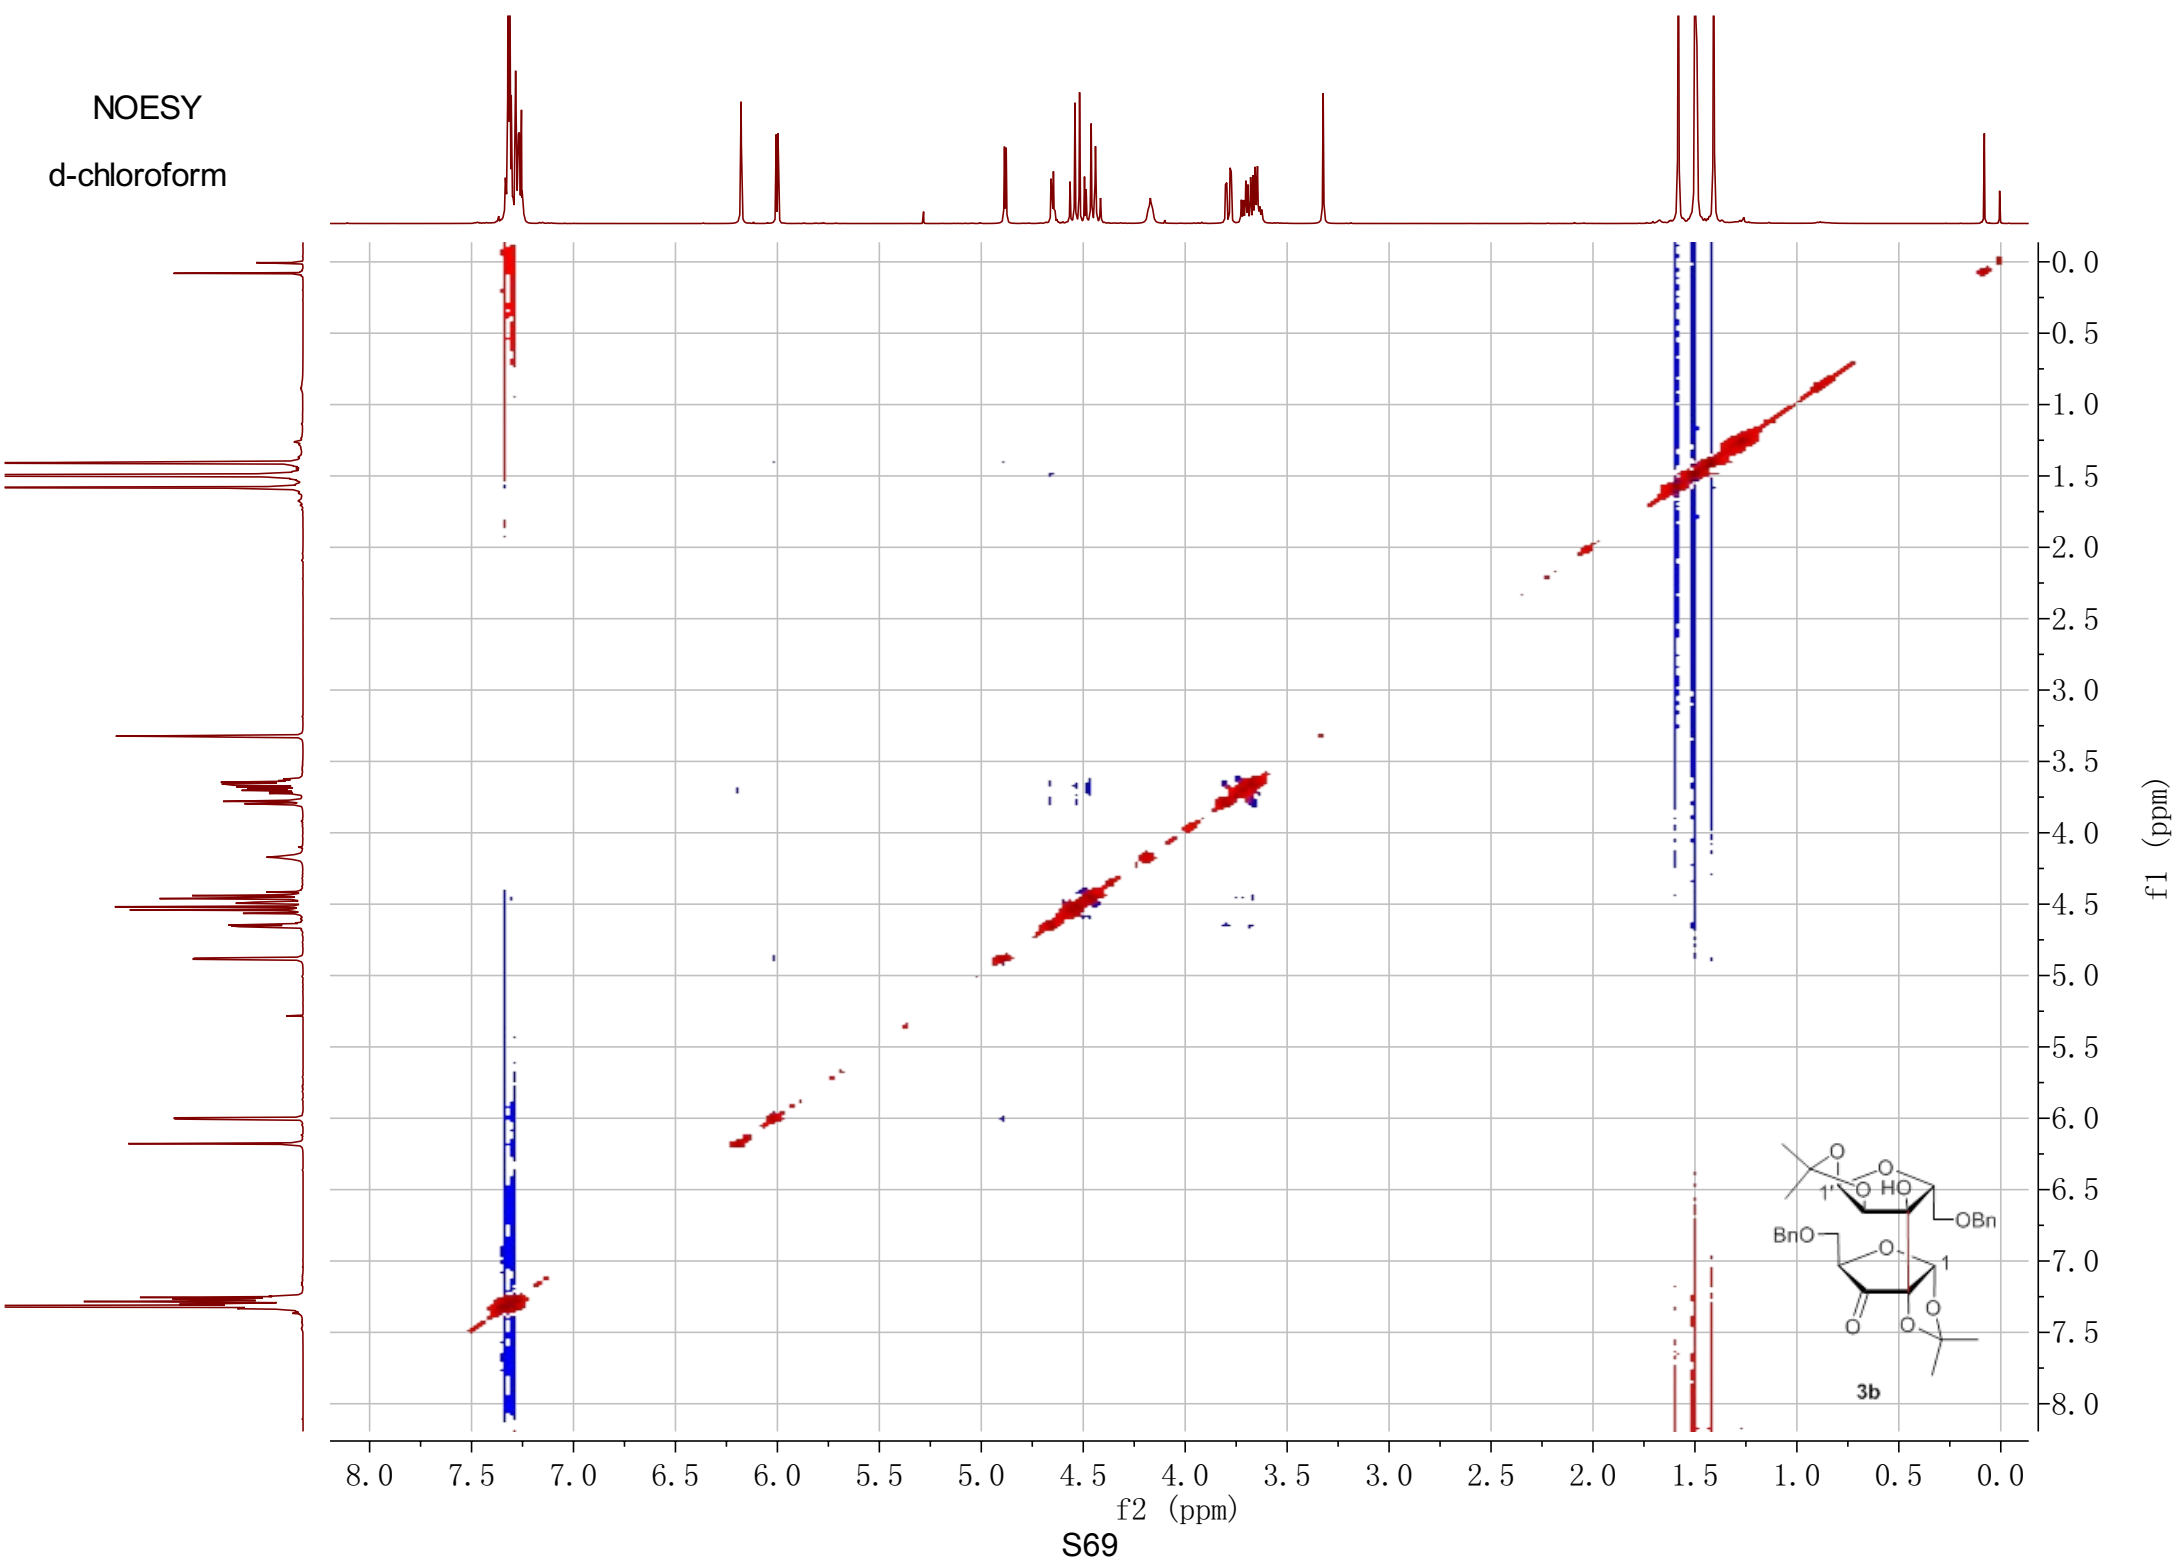

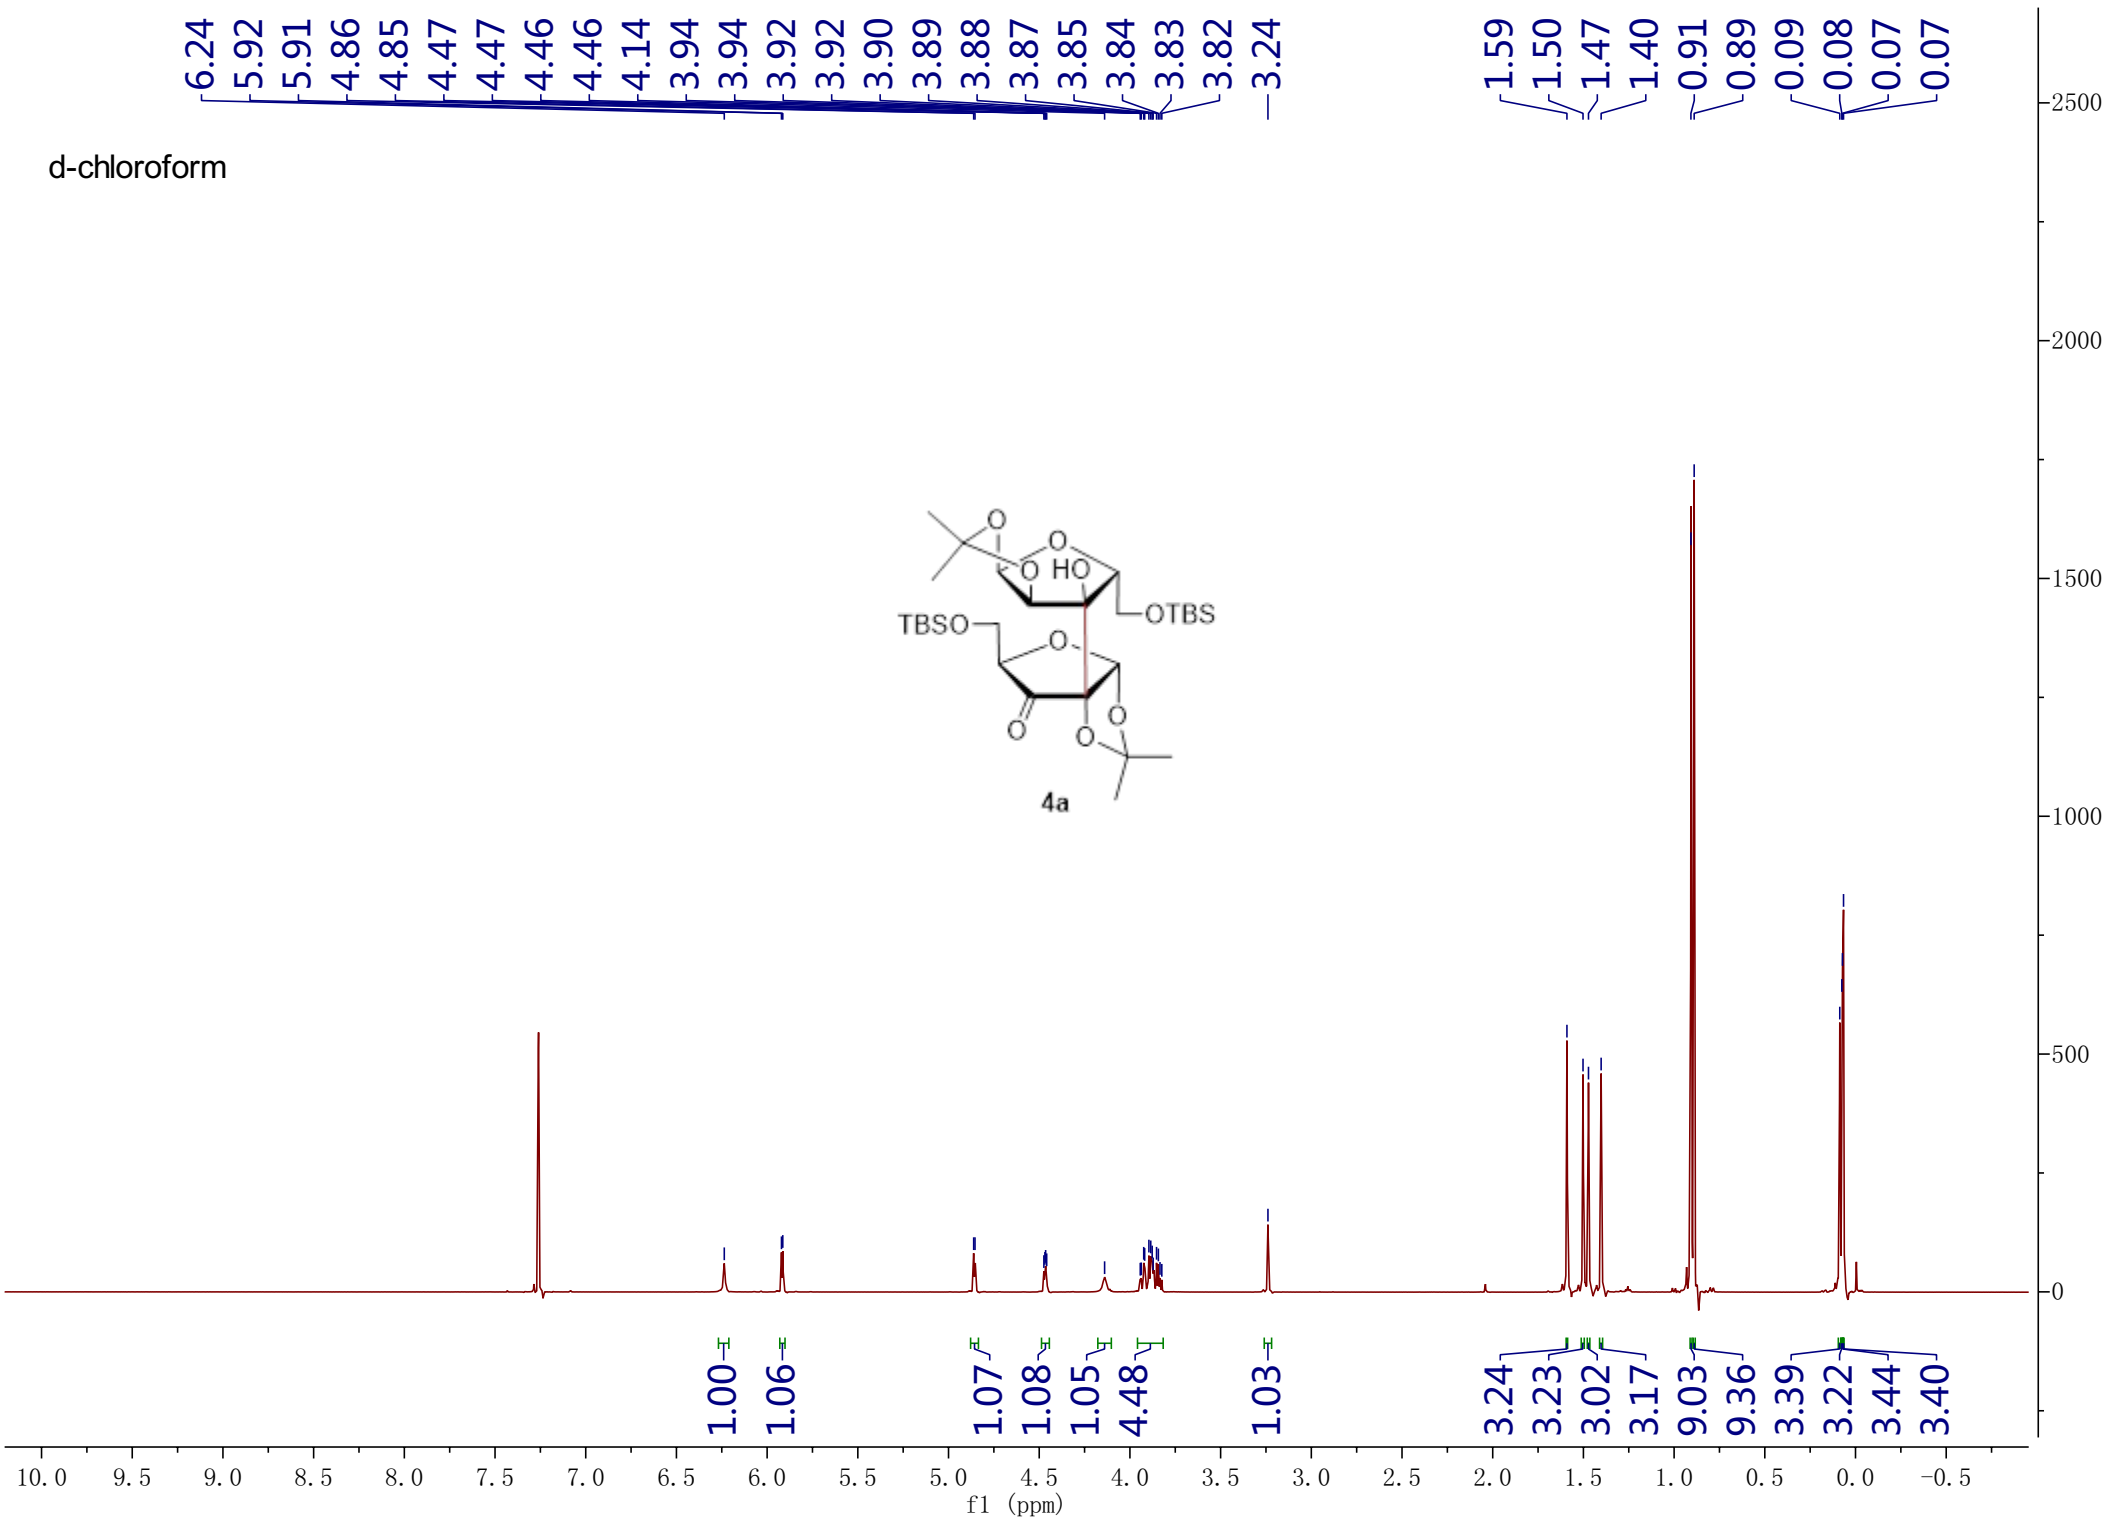

d-chloroform — 208.8

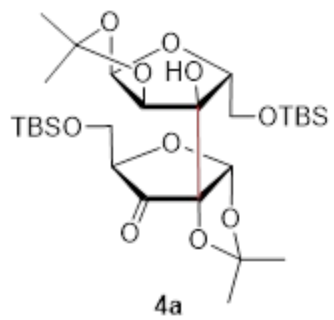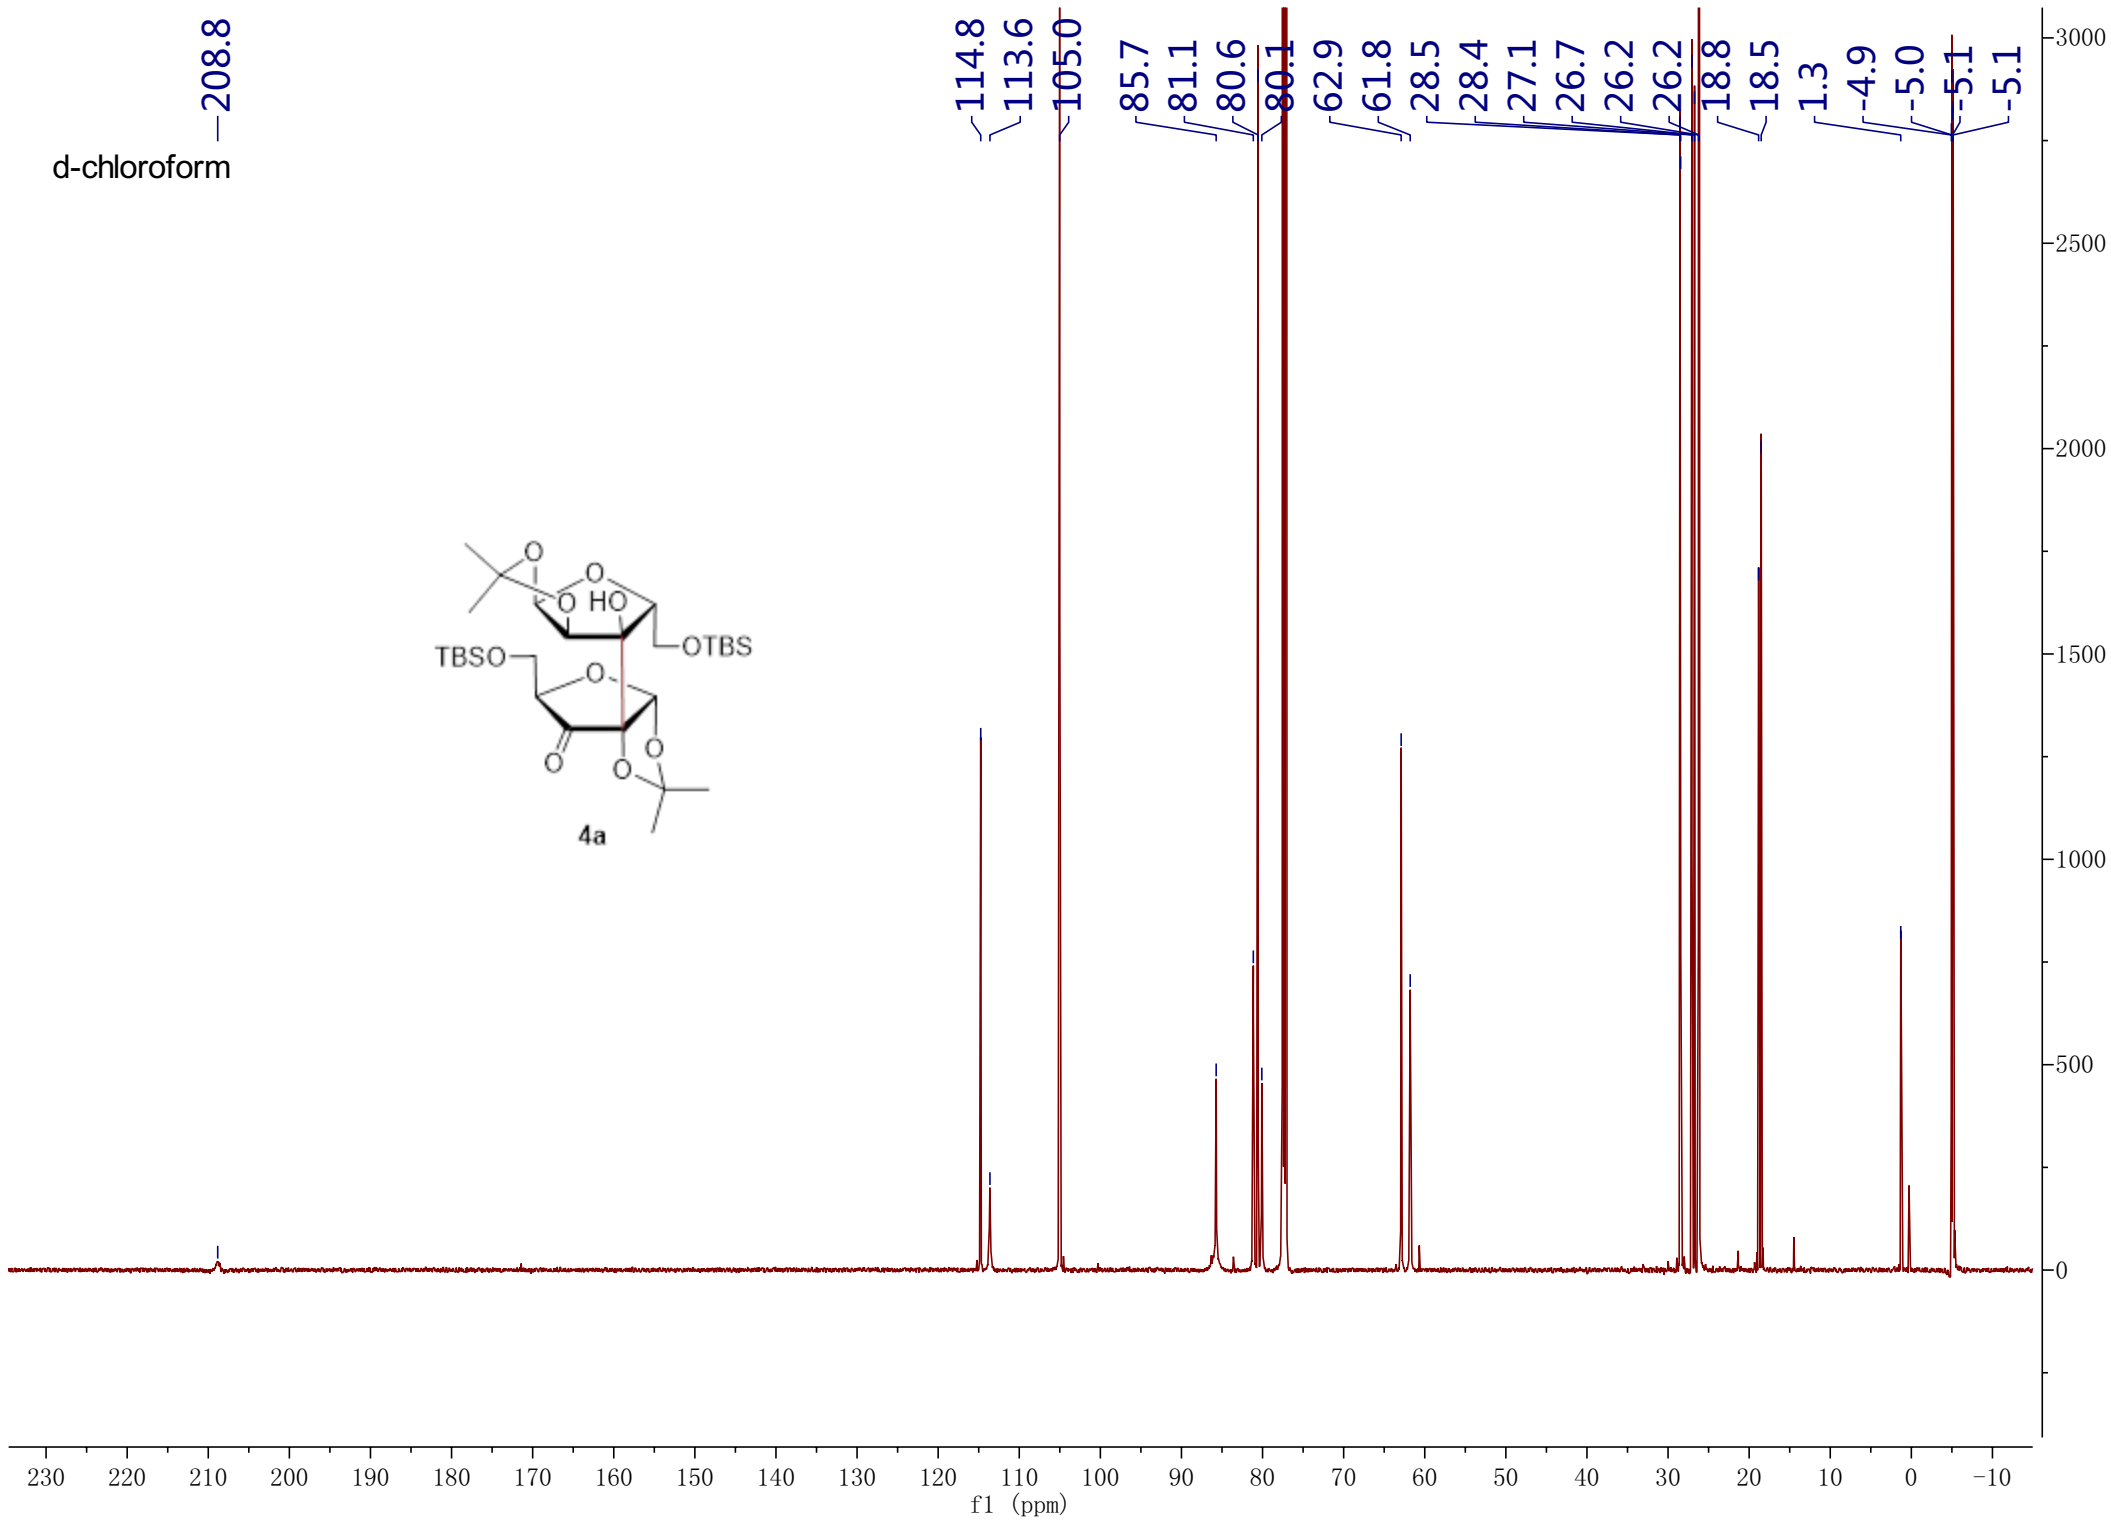

COSY  
d-chloroform

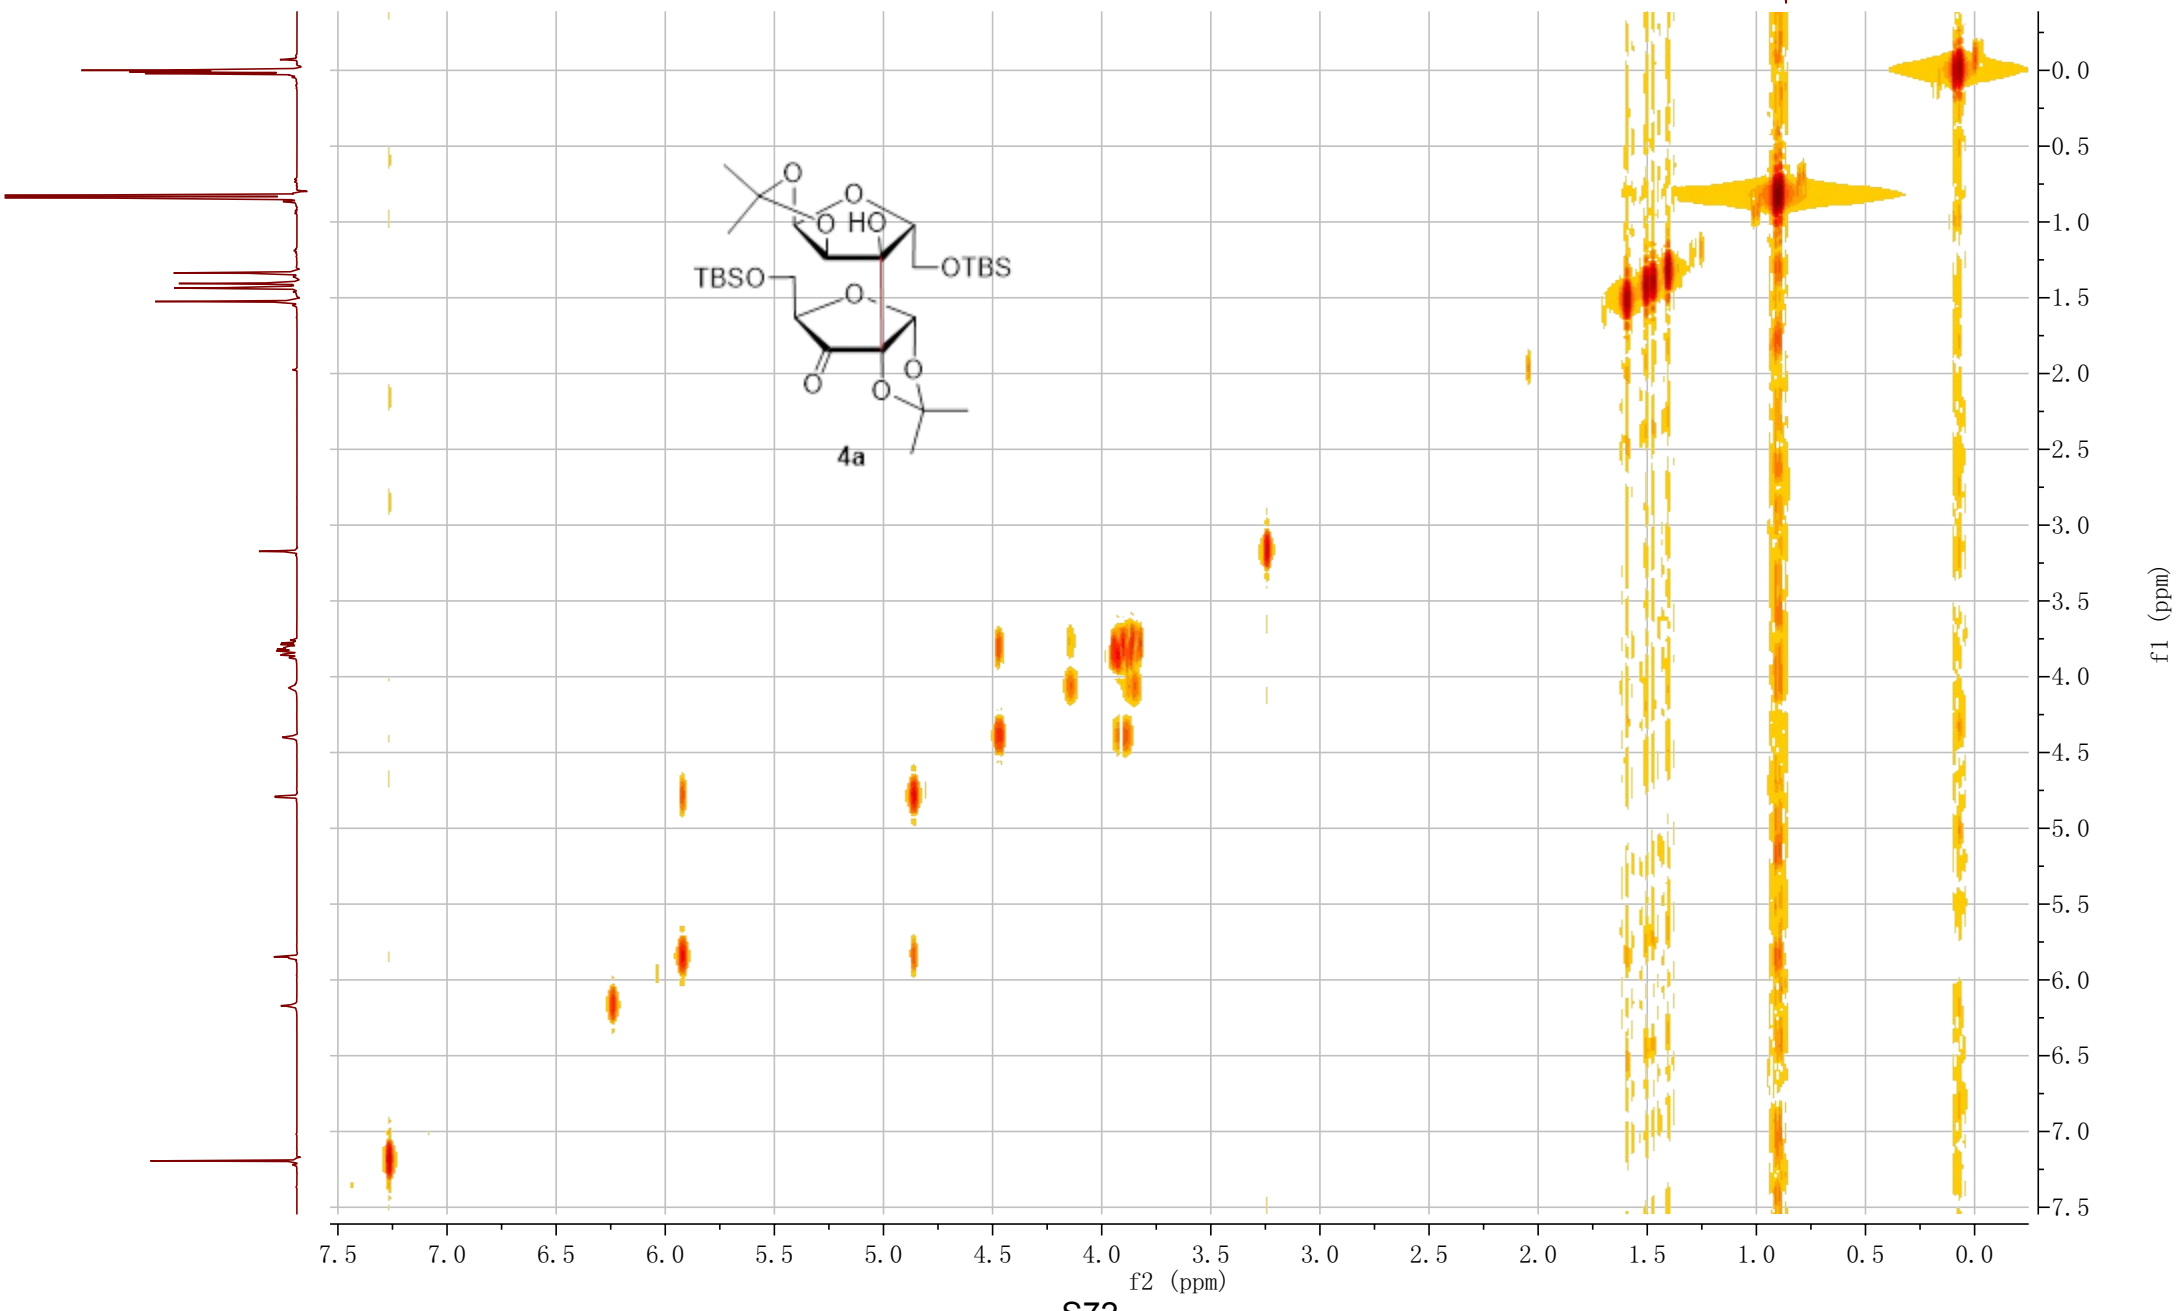

S72



HSQC  
d-chloroform

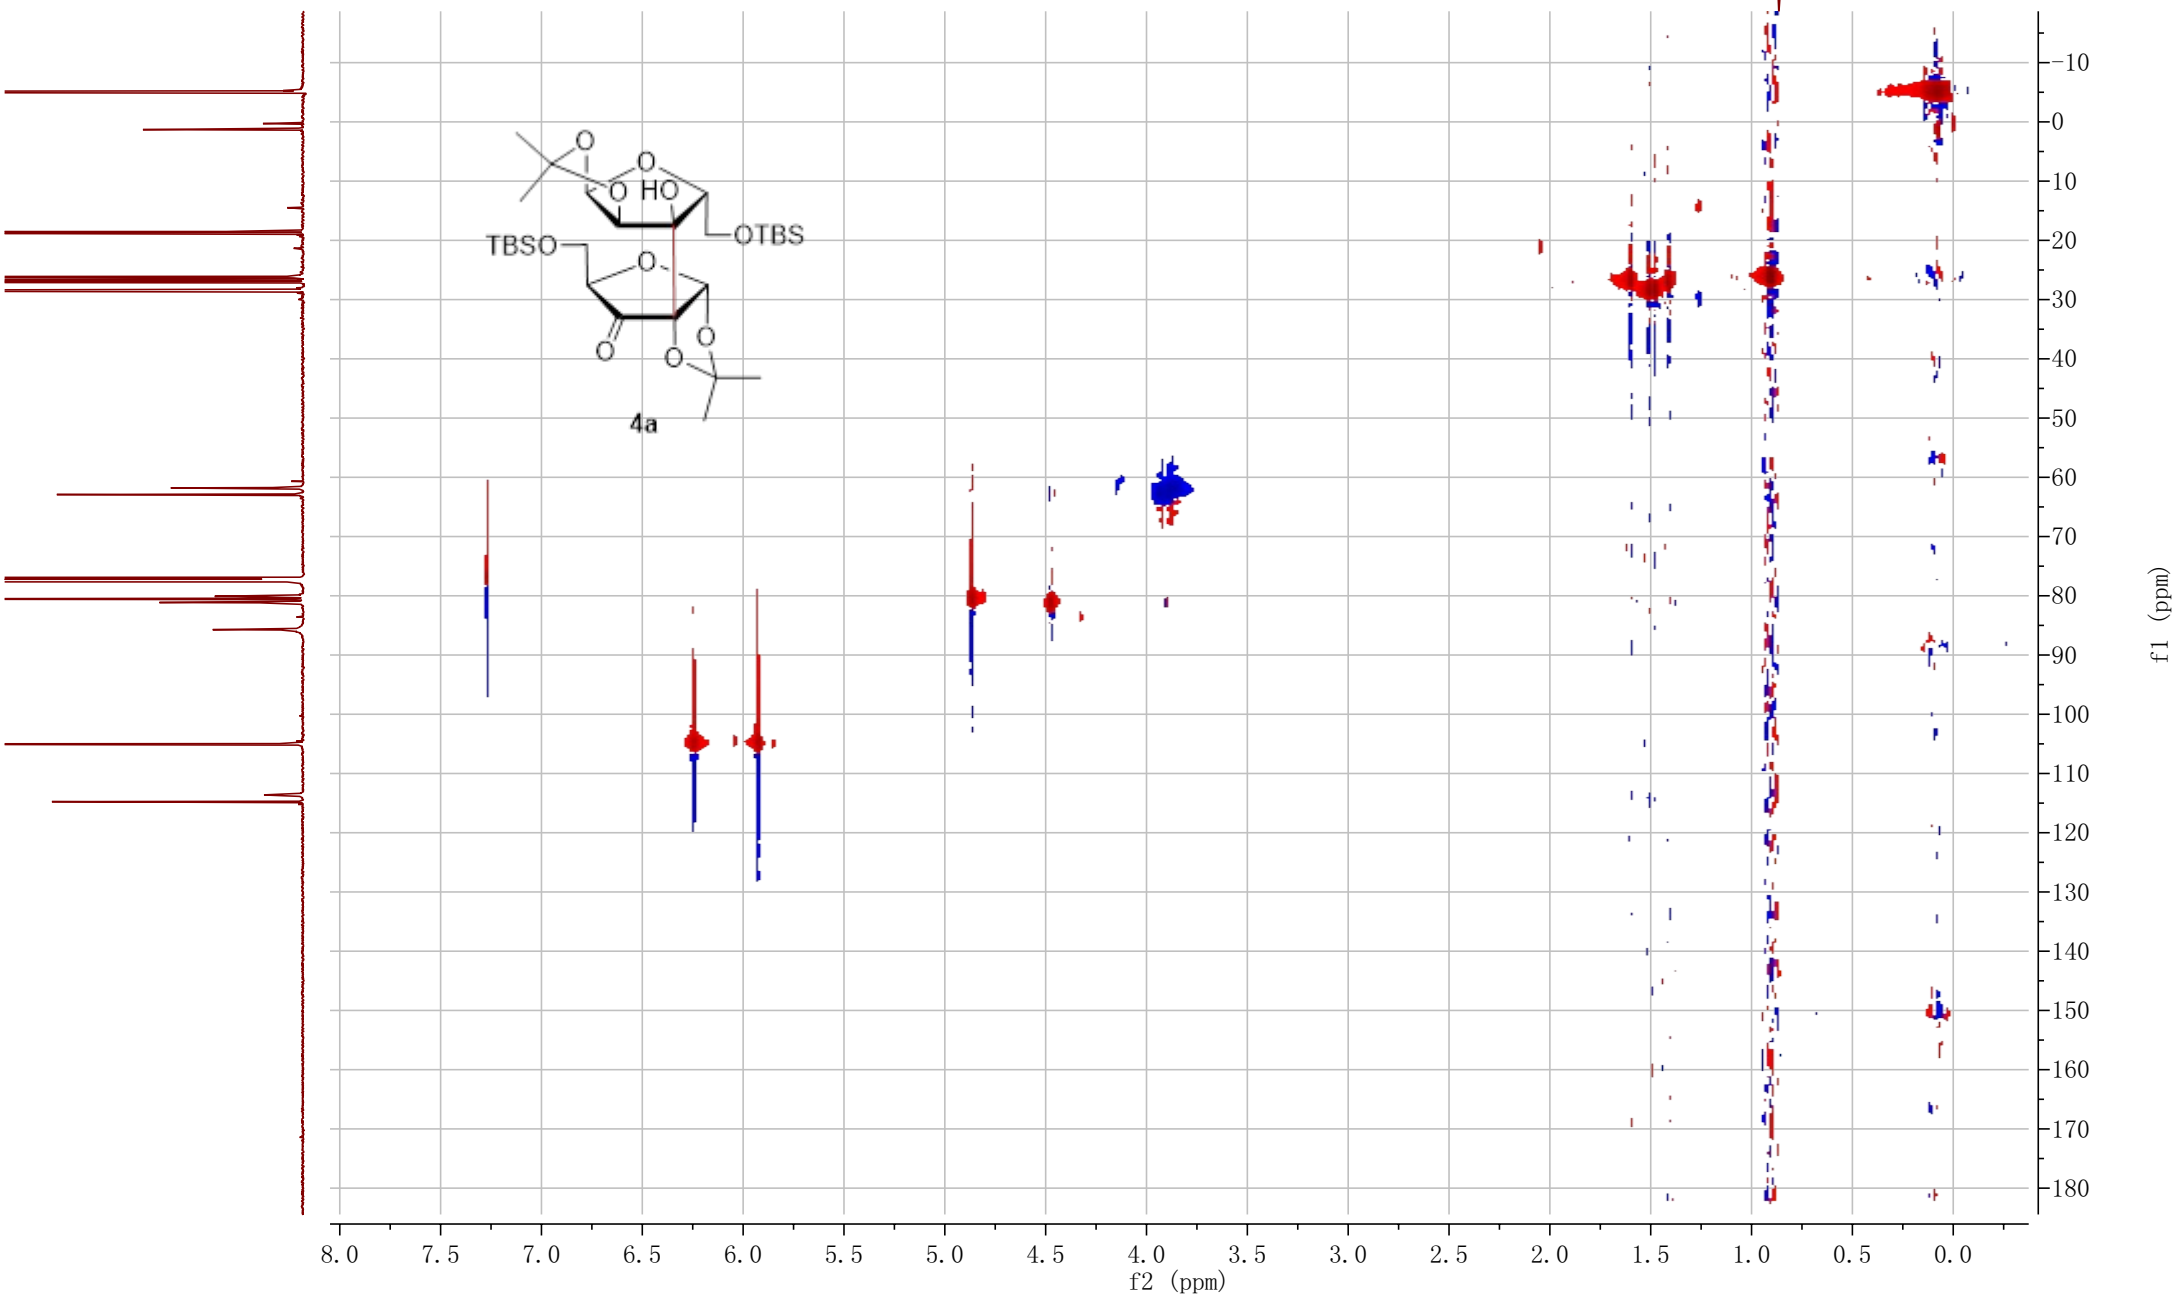

HMBC  
d-chloroform

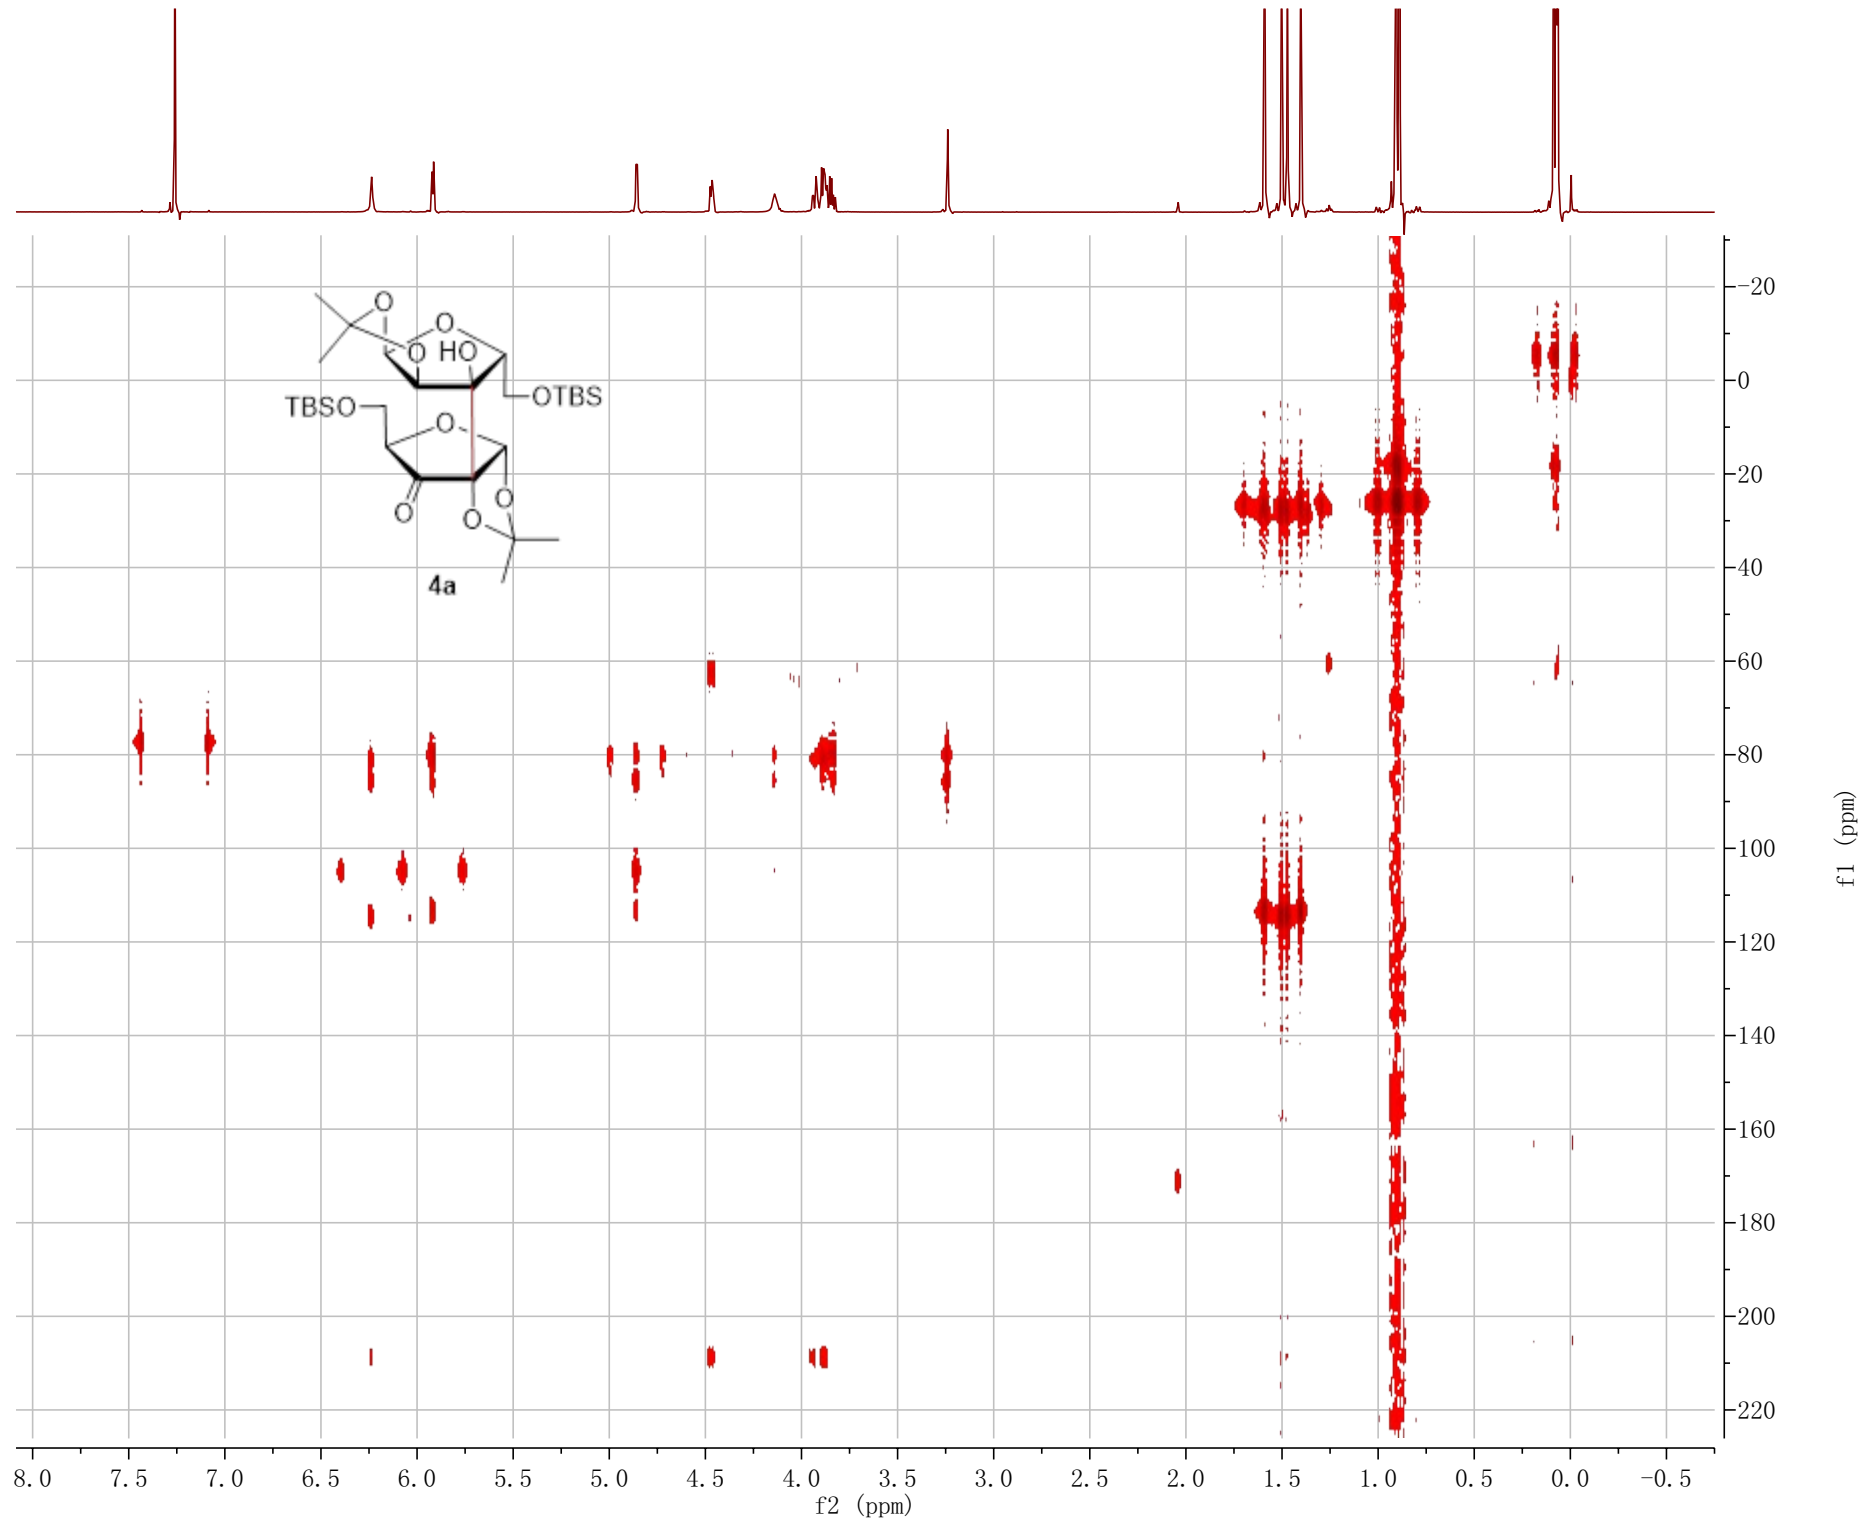

S74

NOESY  
d-chloroform

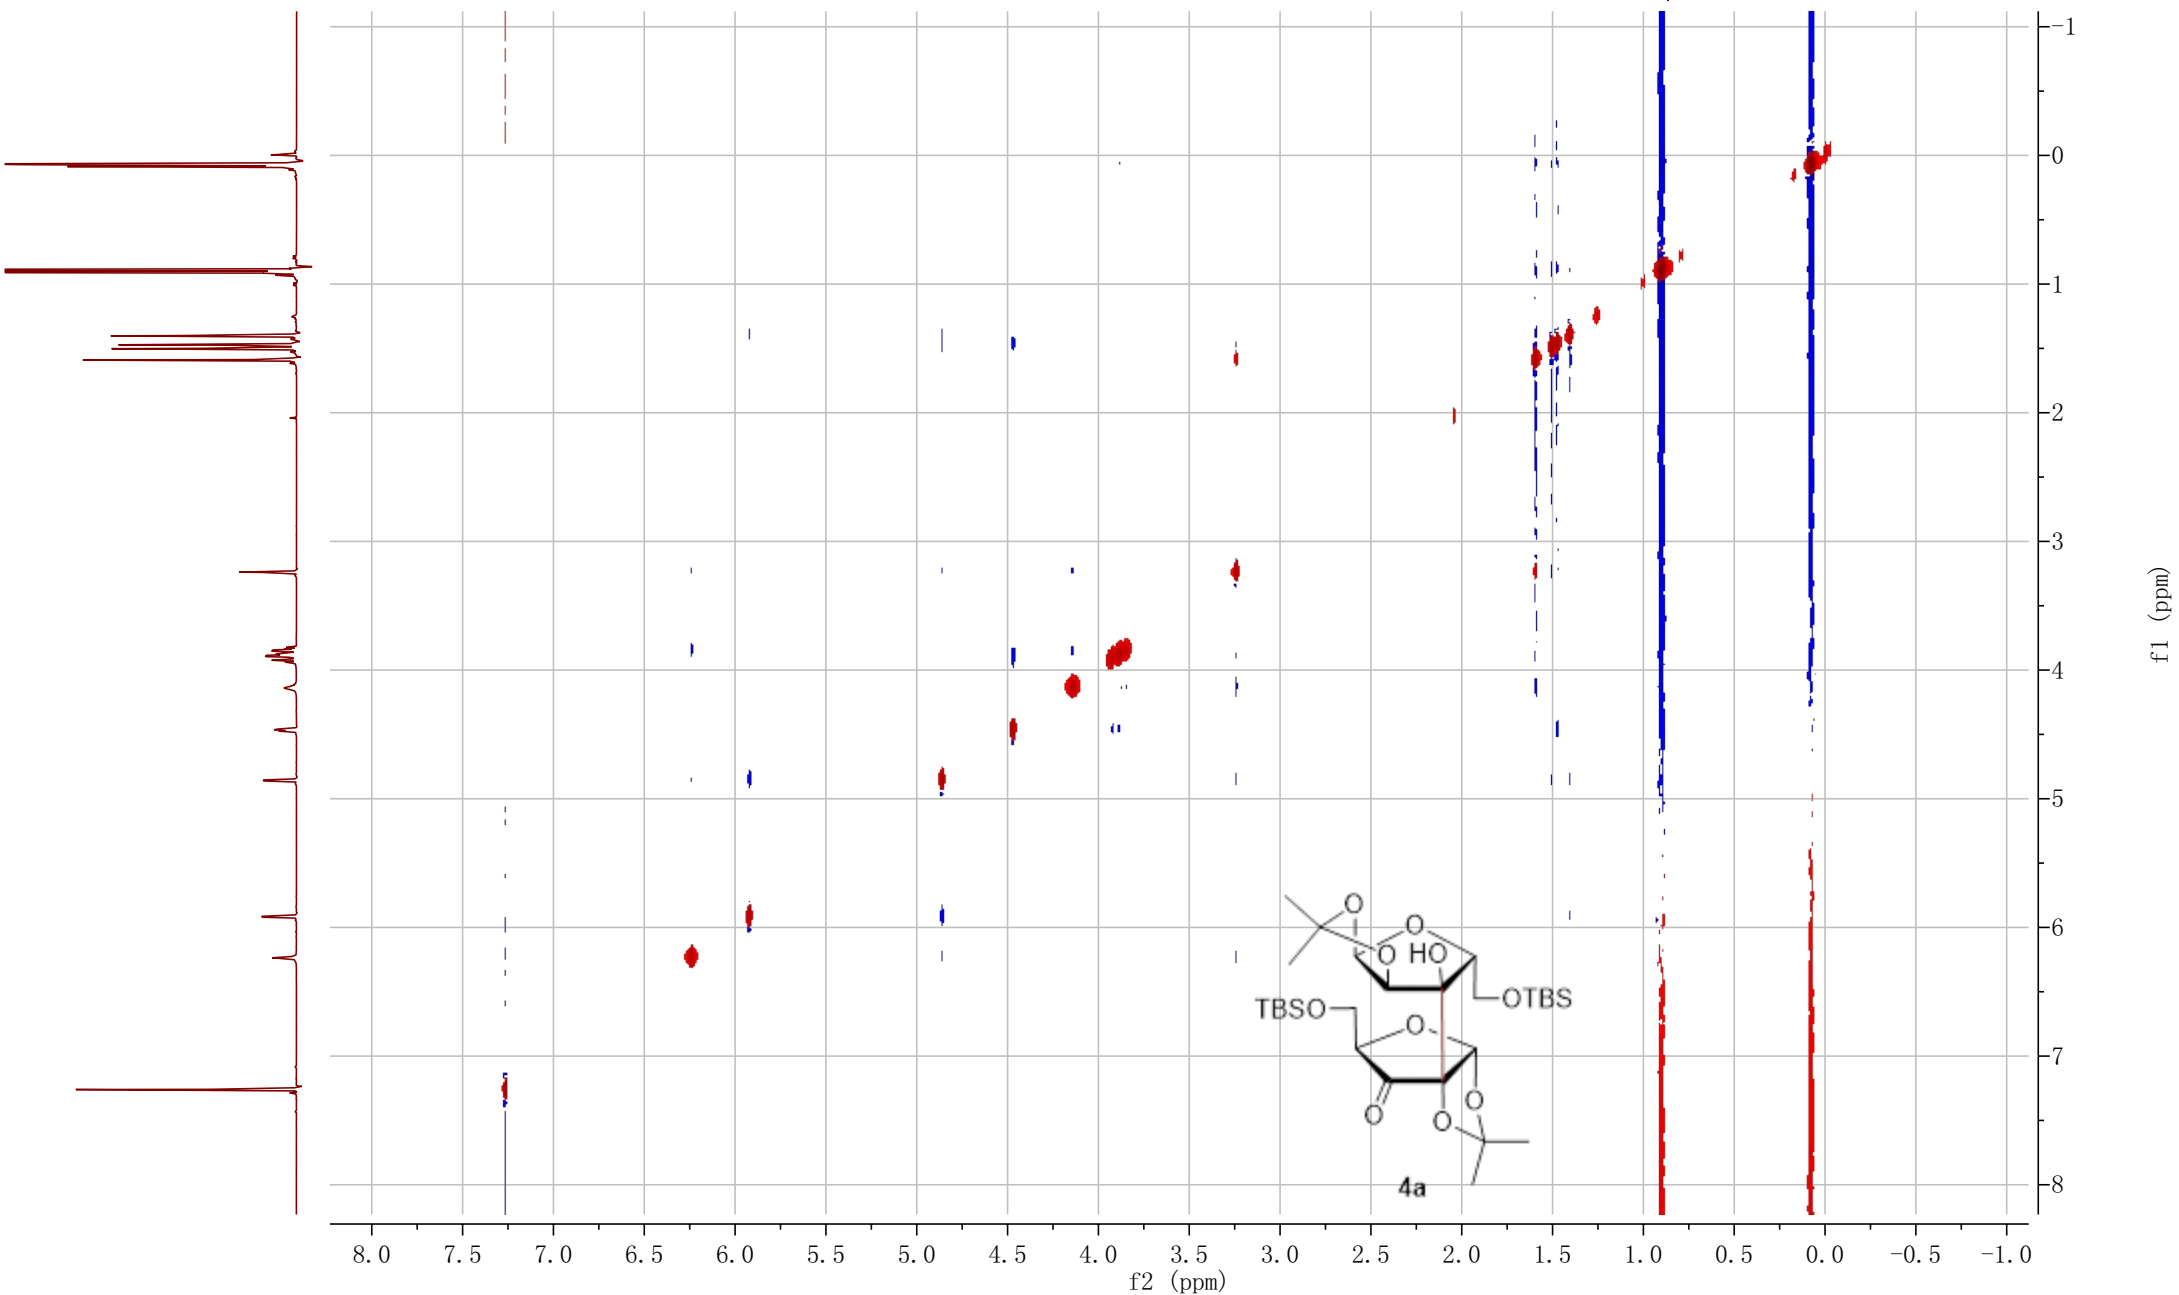

S75

d-chloroform

5.43  
5.24  
5.21  
5.20  
4.97  
4.97  
4.96  
4.96  
4.95  
4.94  
4.94  
4.90  
4.88  
4.38  
4.37  
4.36  
4.25  
4.23  
4.22  
4.20  
4.19  
3.70  
3.69  
3.68  
3.67  
3.58  
3.57  
3.57  
3.56  
3.47

1.54  
1.52  
1.42  
1.41

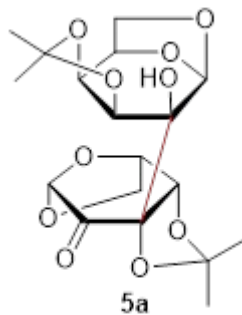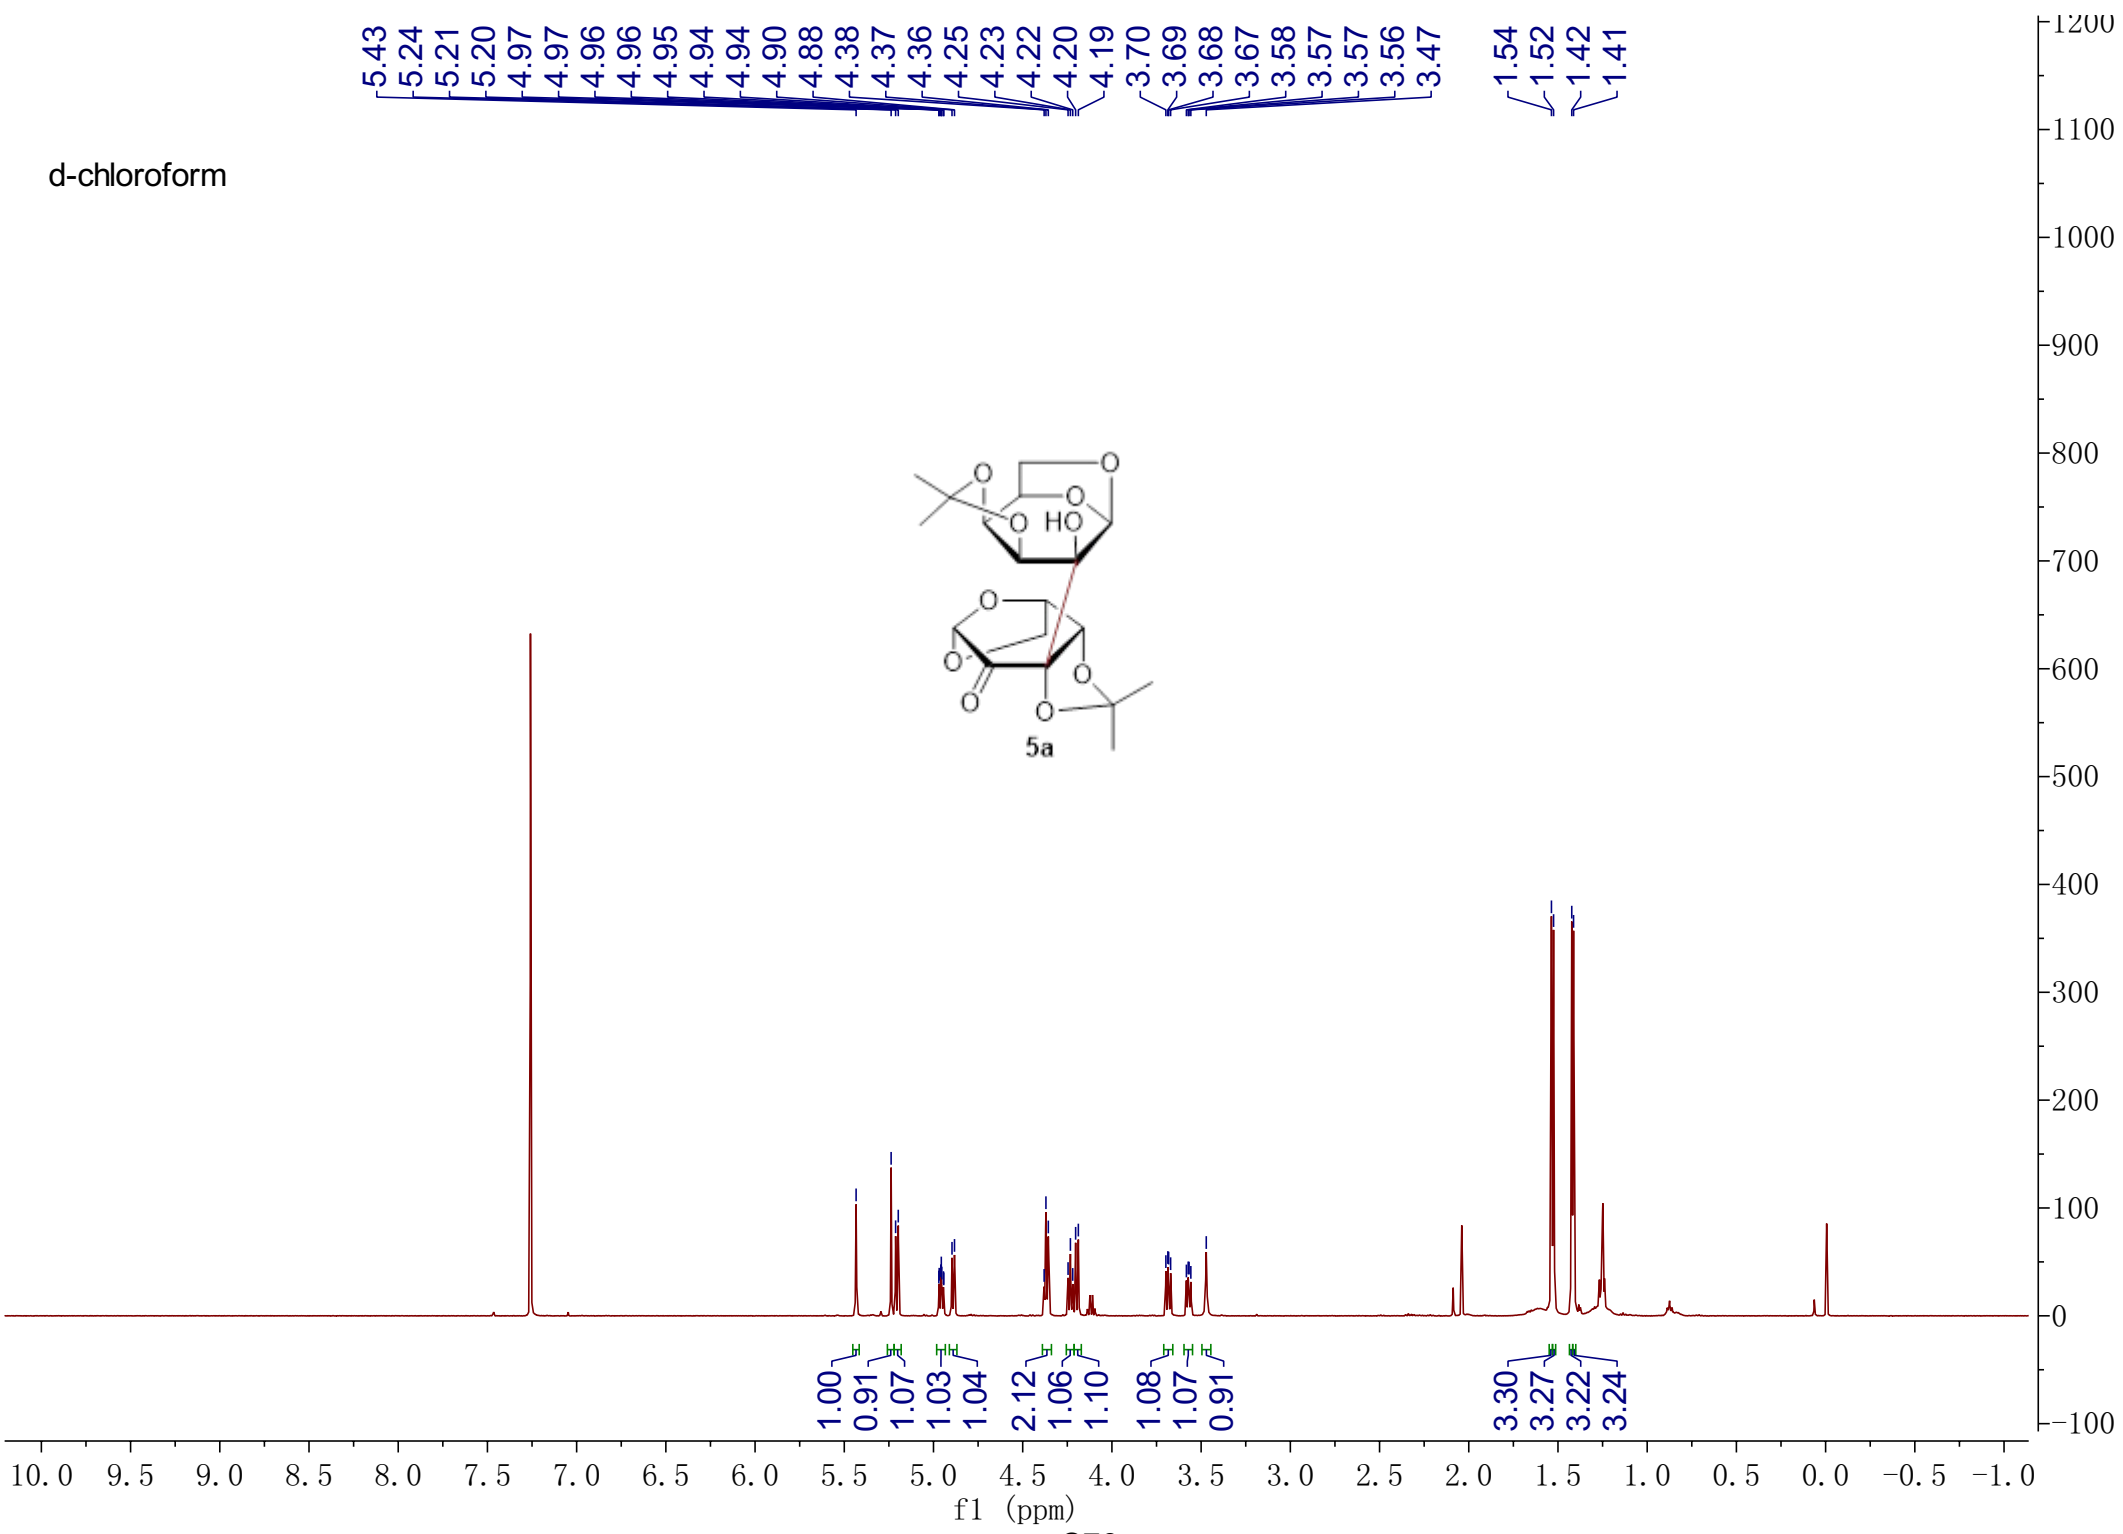

d-chloroform  
—200.8

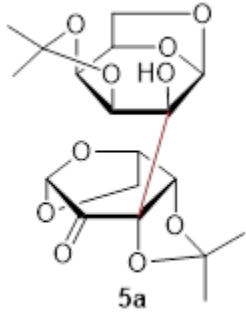

—113.1  
—109.3  
—99.5  
—98.4  
—85.6  
73.9  
73.4  
73.1  
71.0  
70.7  
65.2  
62.6

28.0  
27.2  
25.8  
25.0

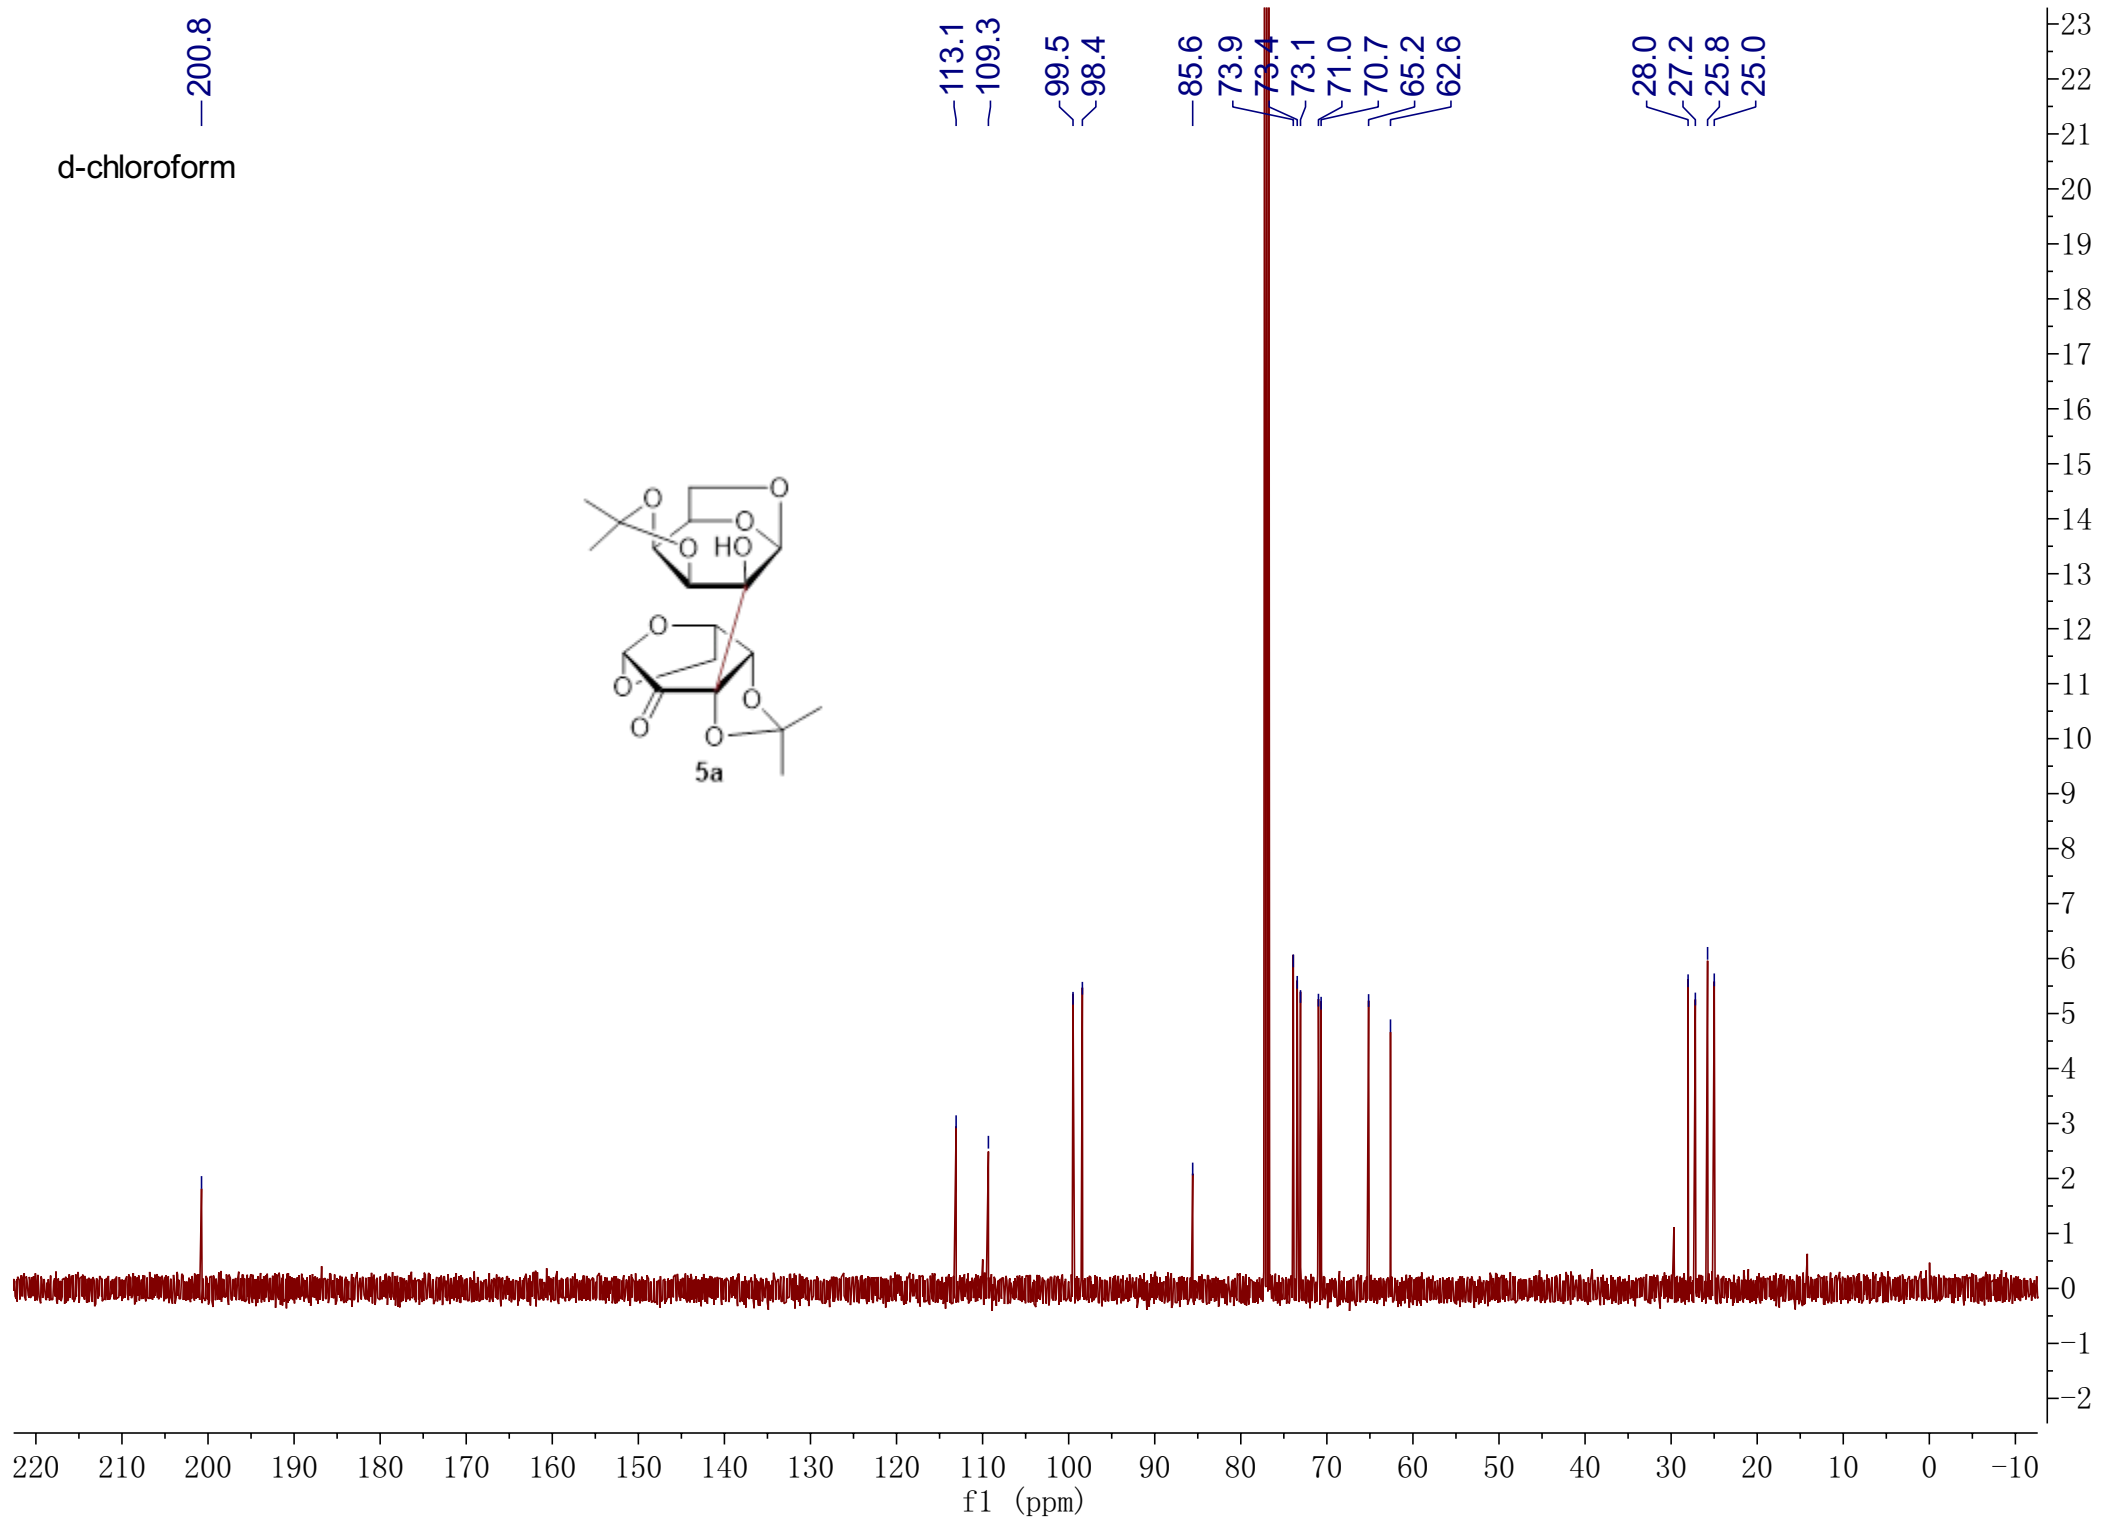

S77

COSY

d-chloroform

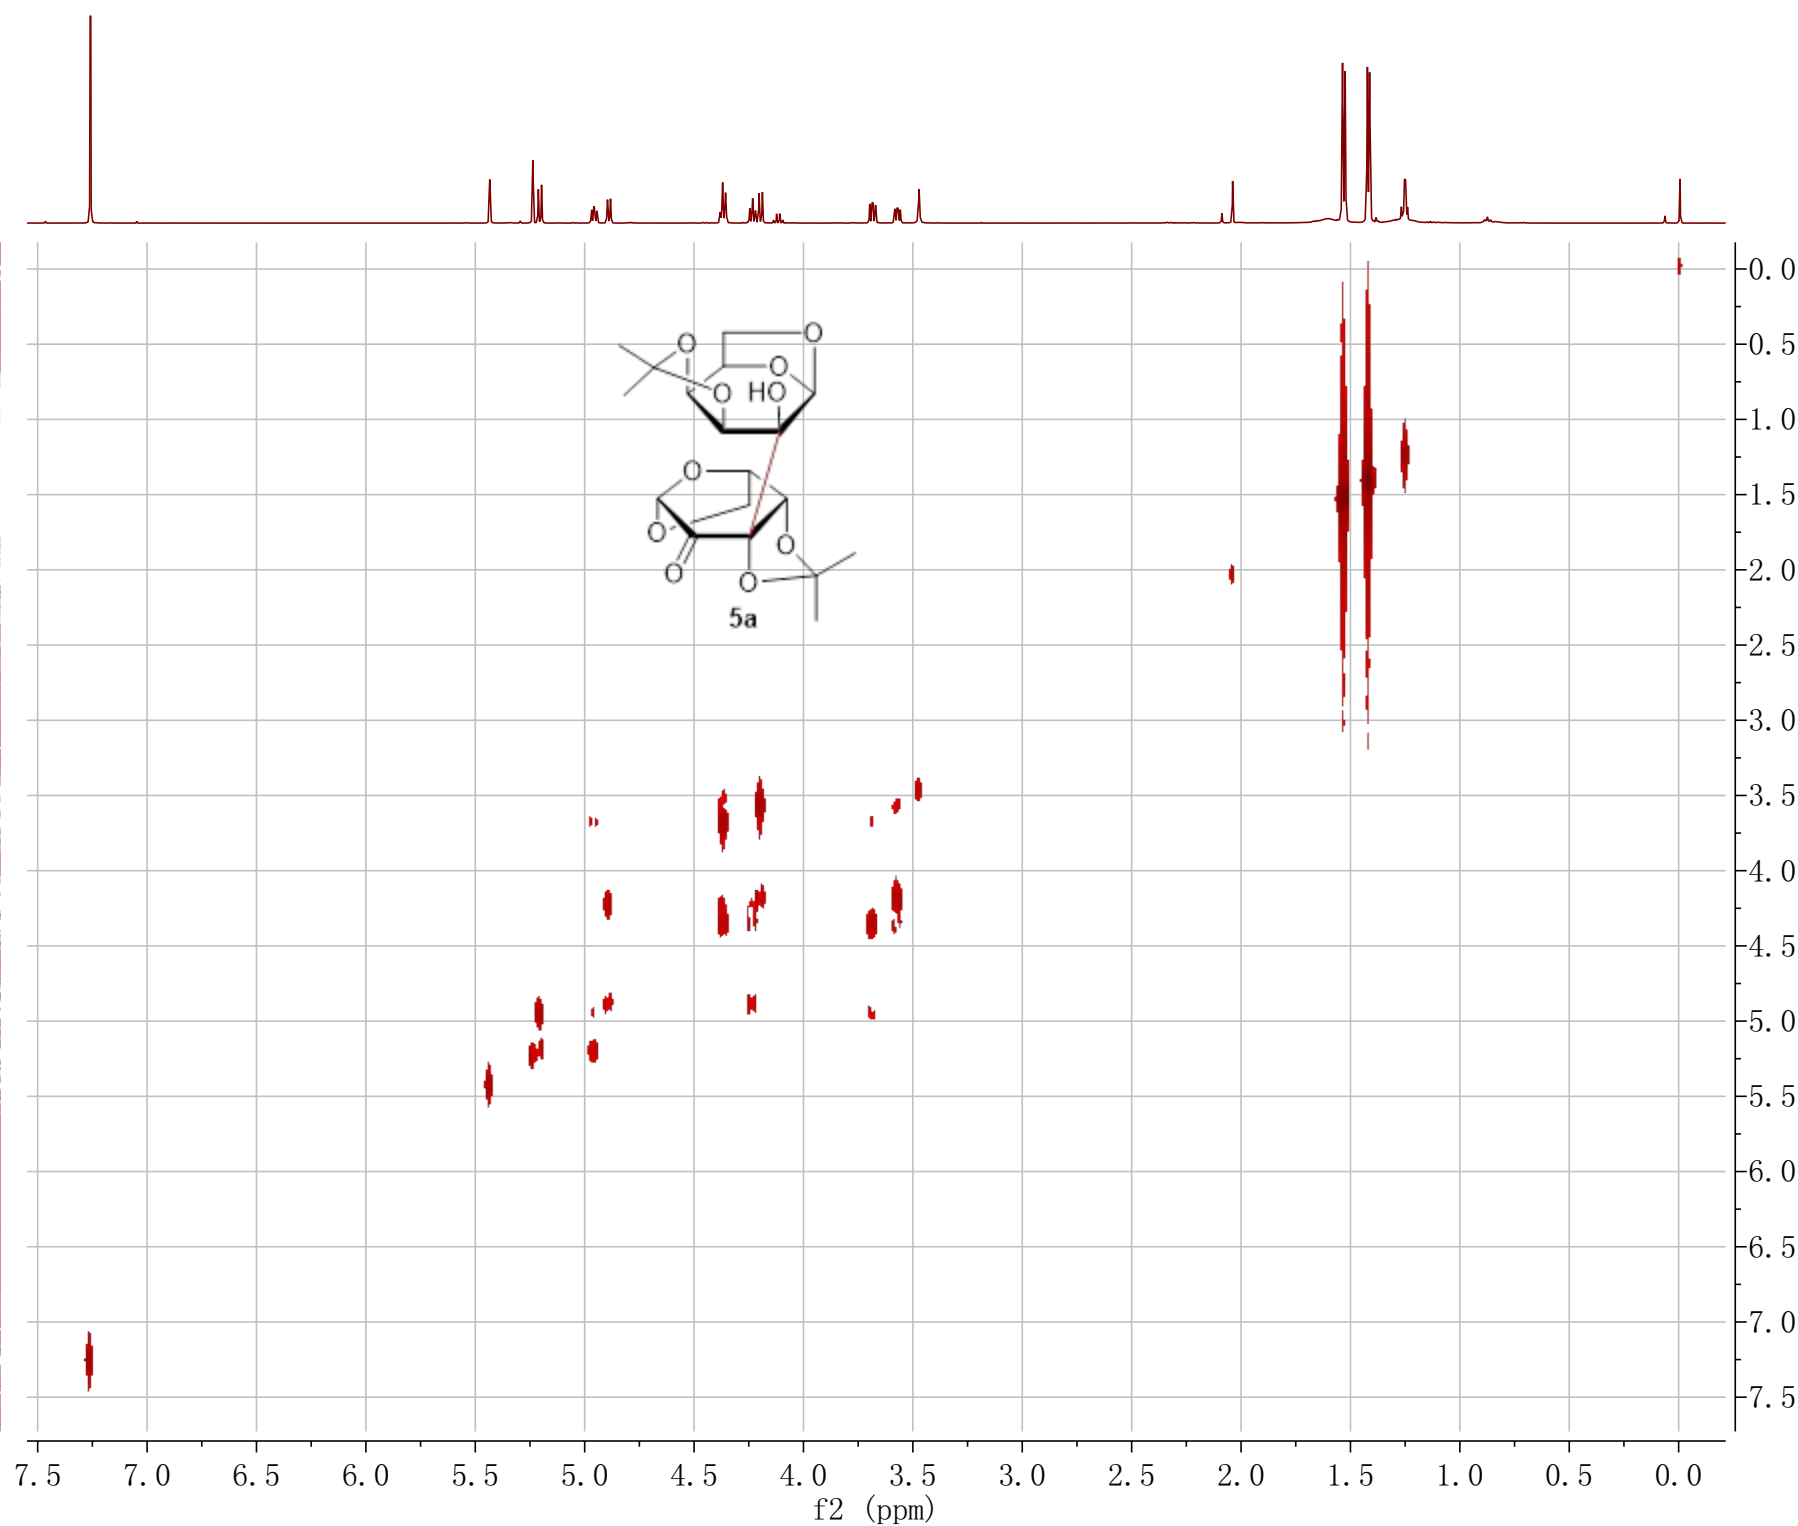

S78

d-chloroform

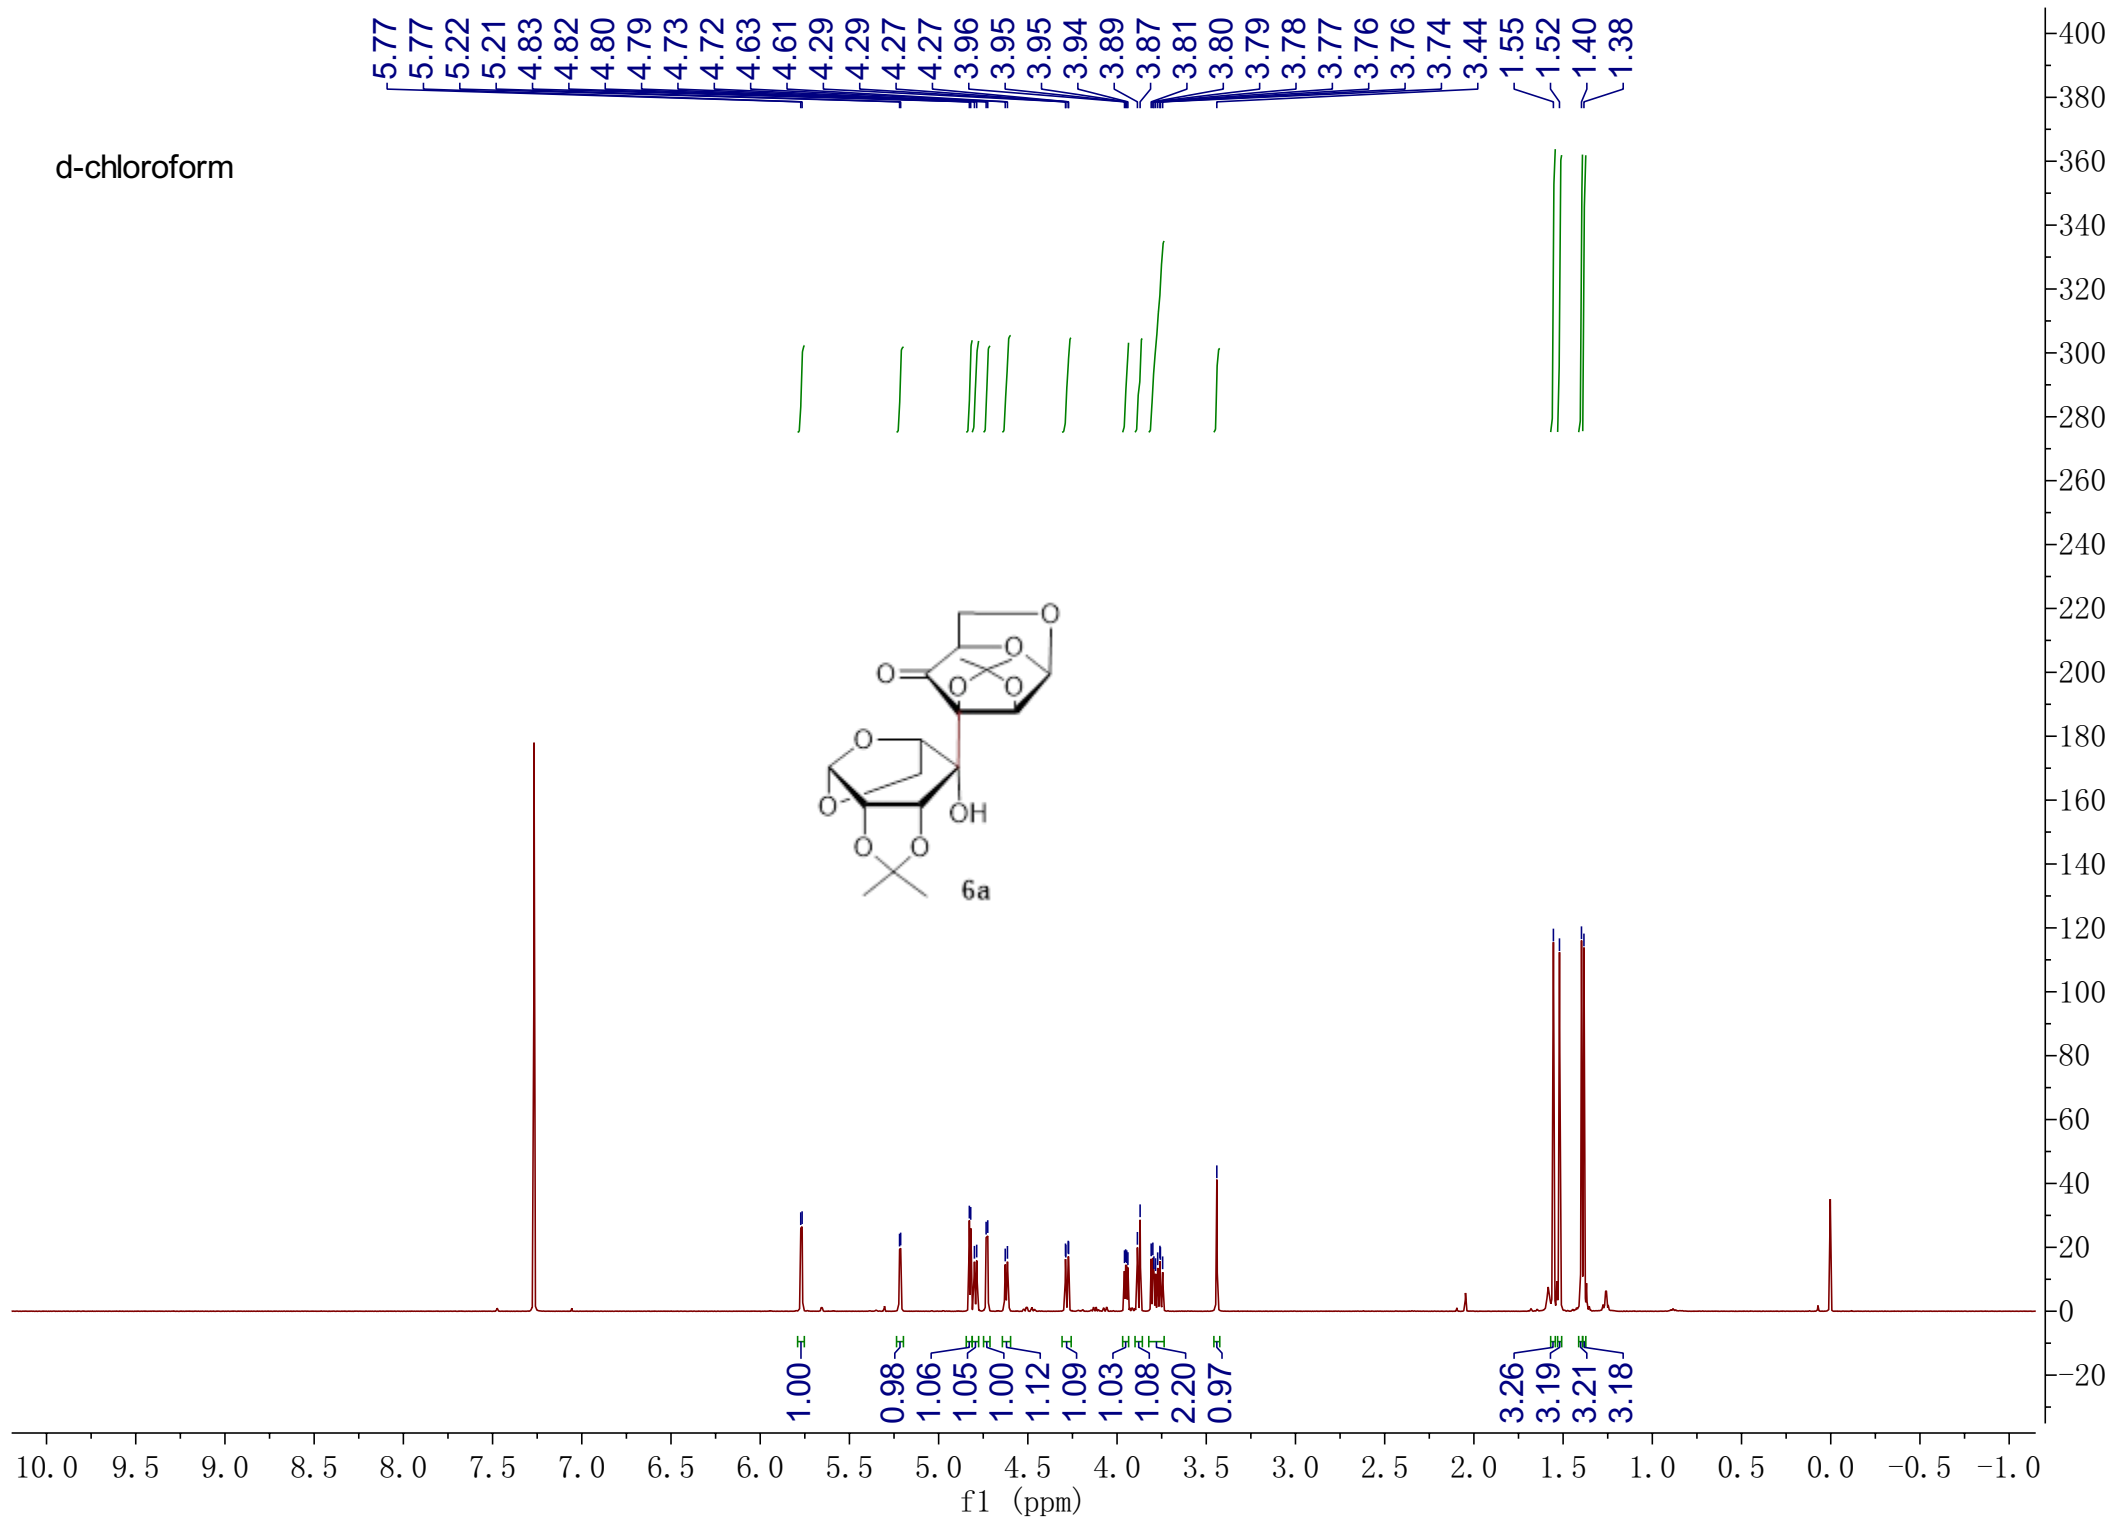

d-chloroform  
— 207.7

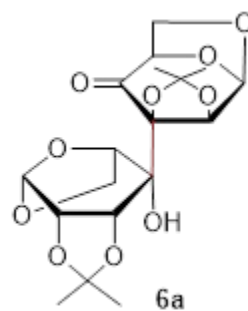

— 114.7  
— 110.6  
— 99.4  
— 98.8  
— 88.9  
— 78.5  
— 76.9  
— 76.4  
— 74.8  
— 73.3  
— 73.0  
— 68.3  
— 63.7  
— 28.1  
— 28.0  
— 26.2  
— 25.9

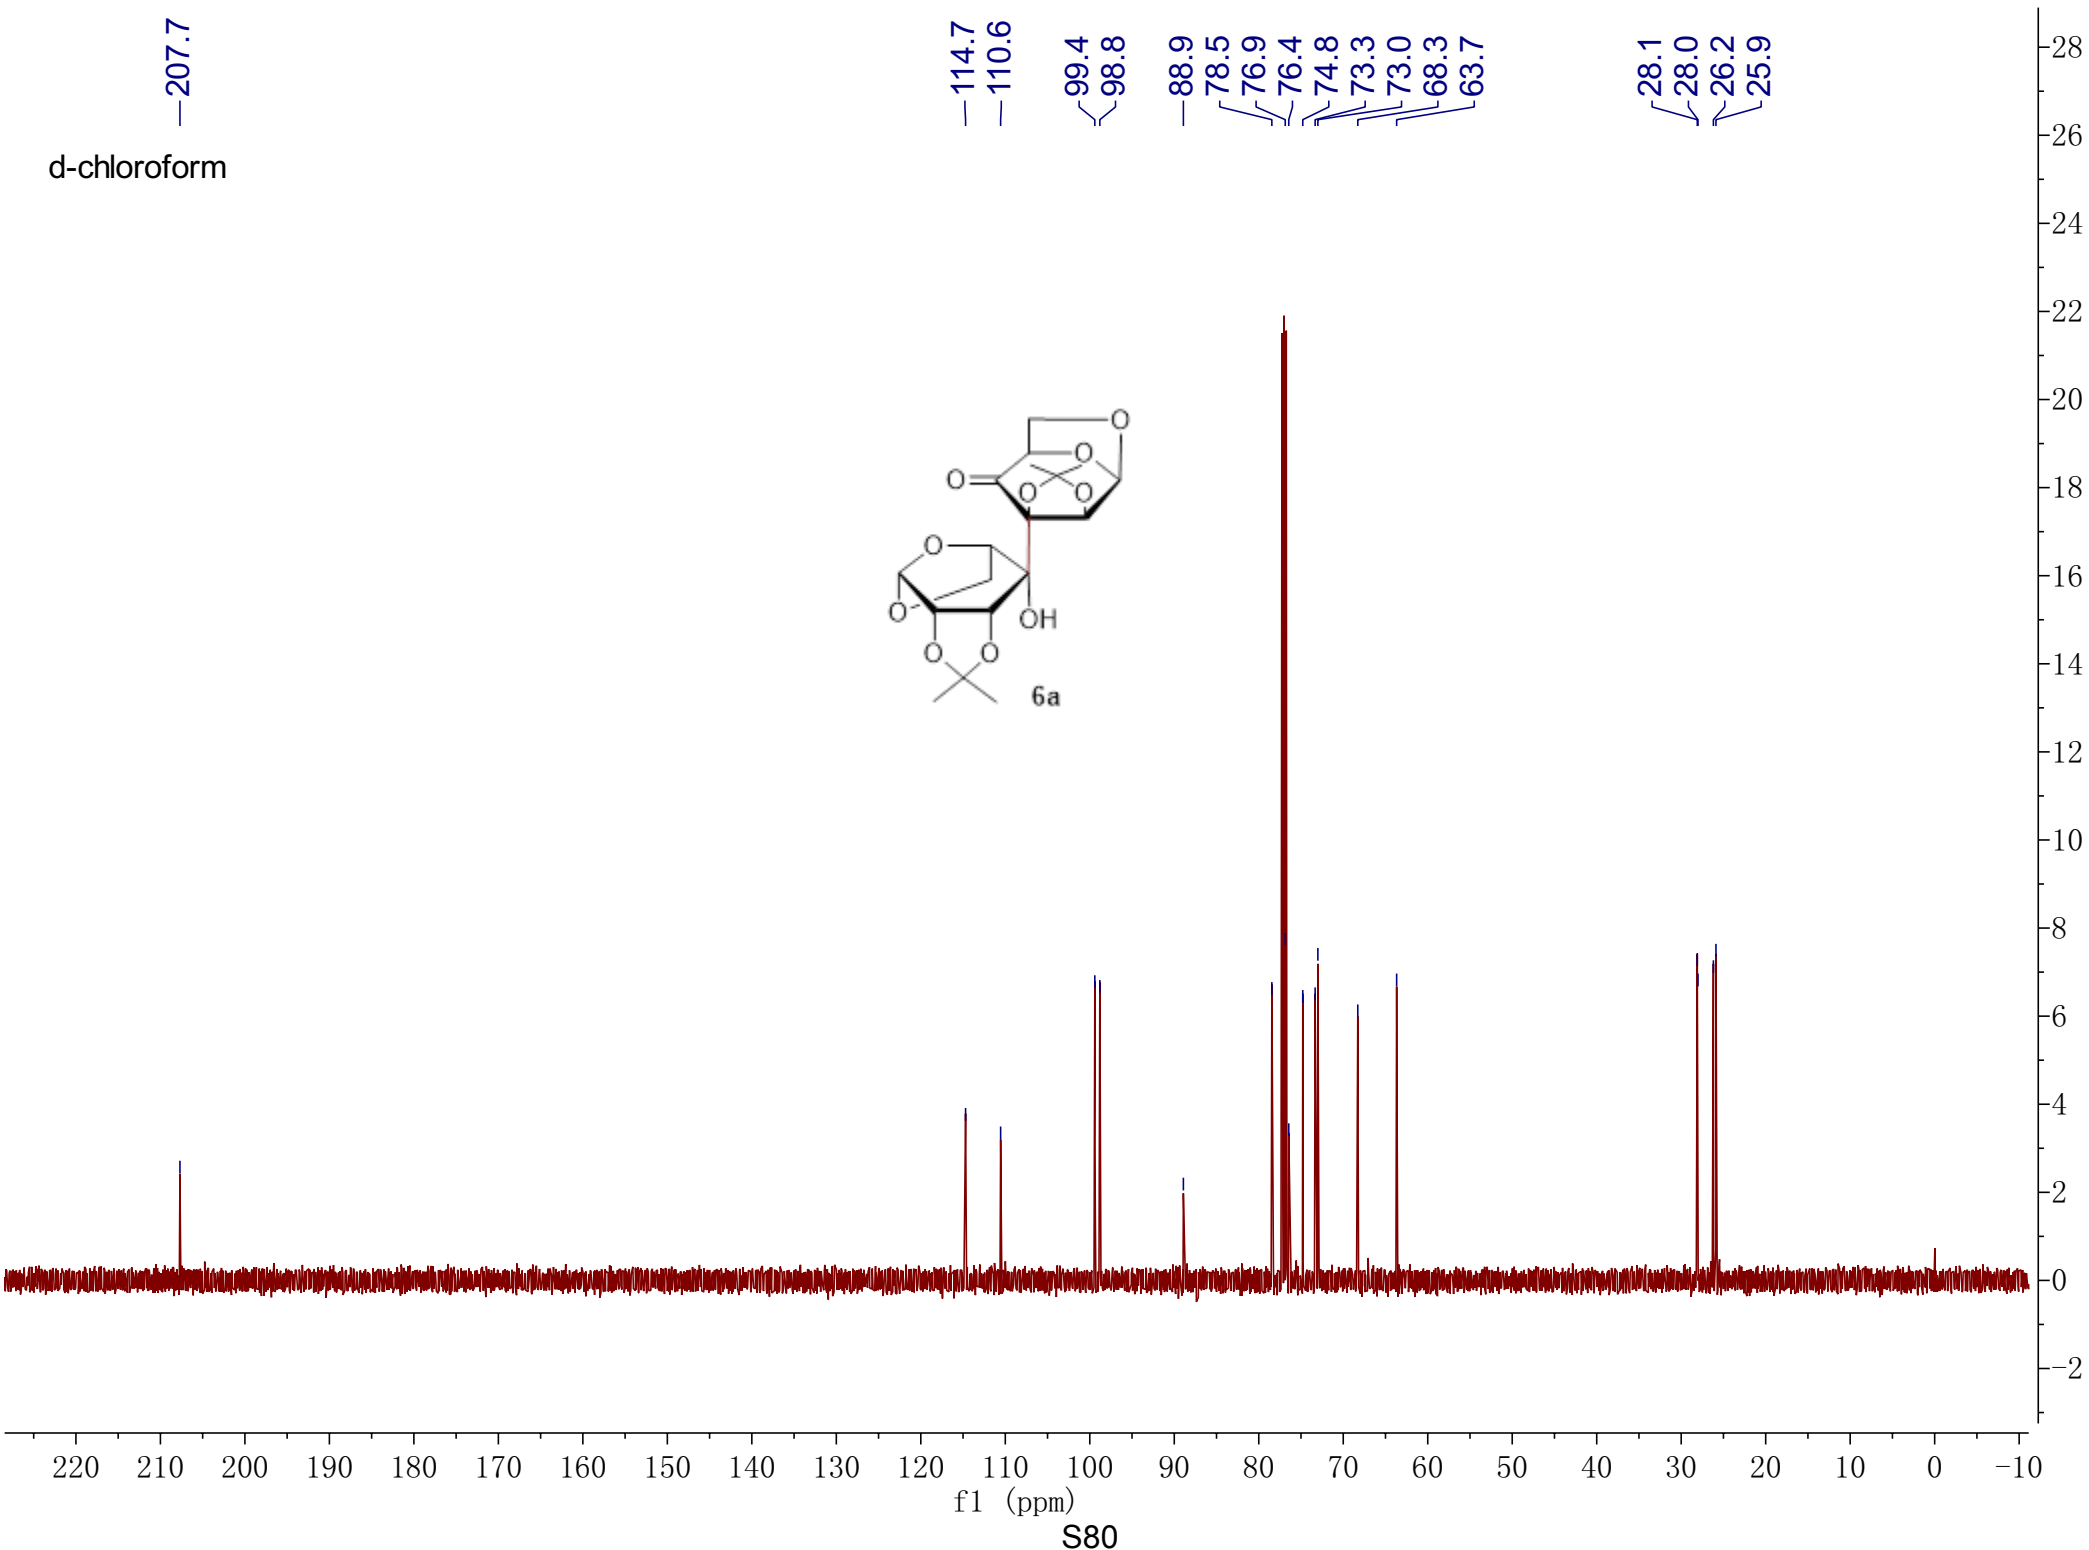



COSY

d-chloroform

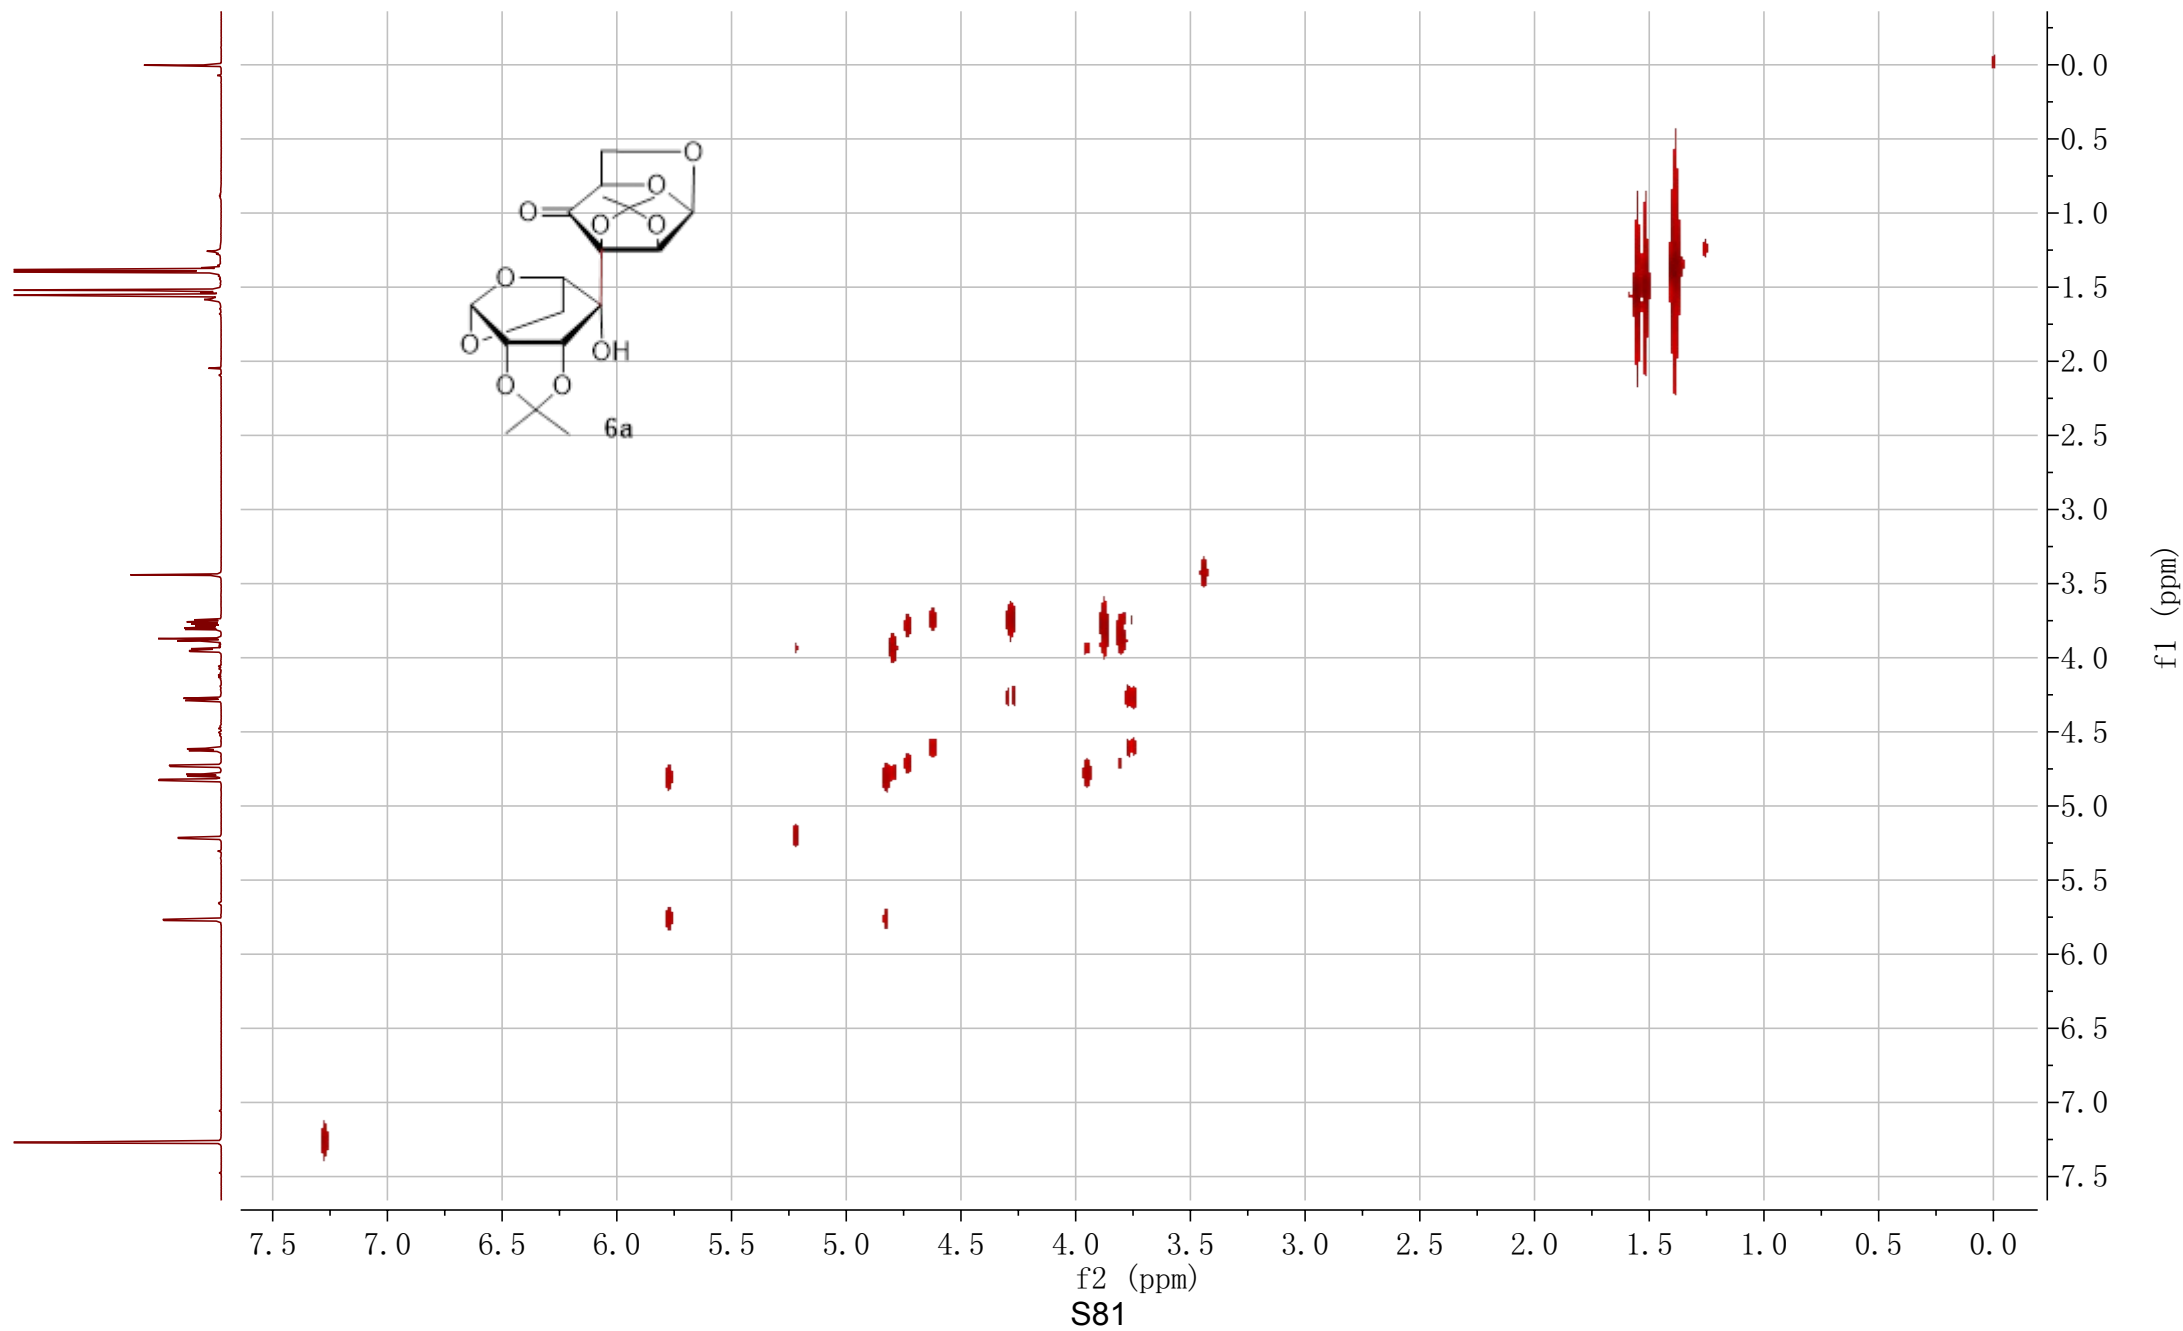

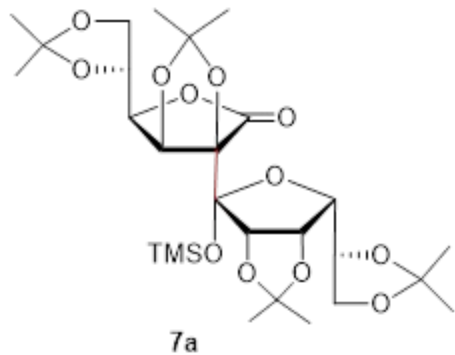

d-chloroform

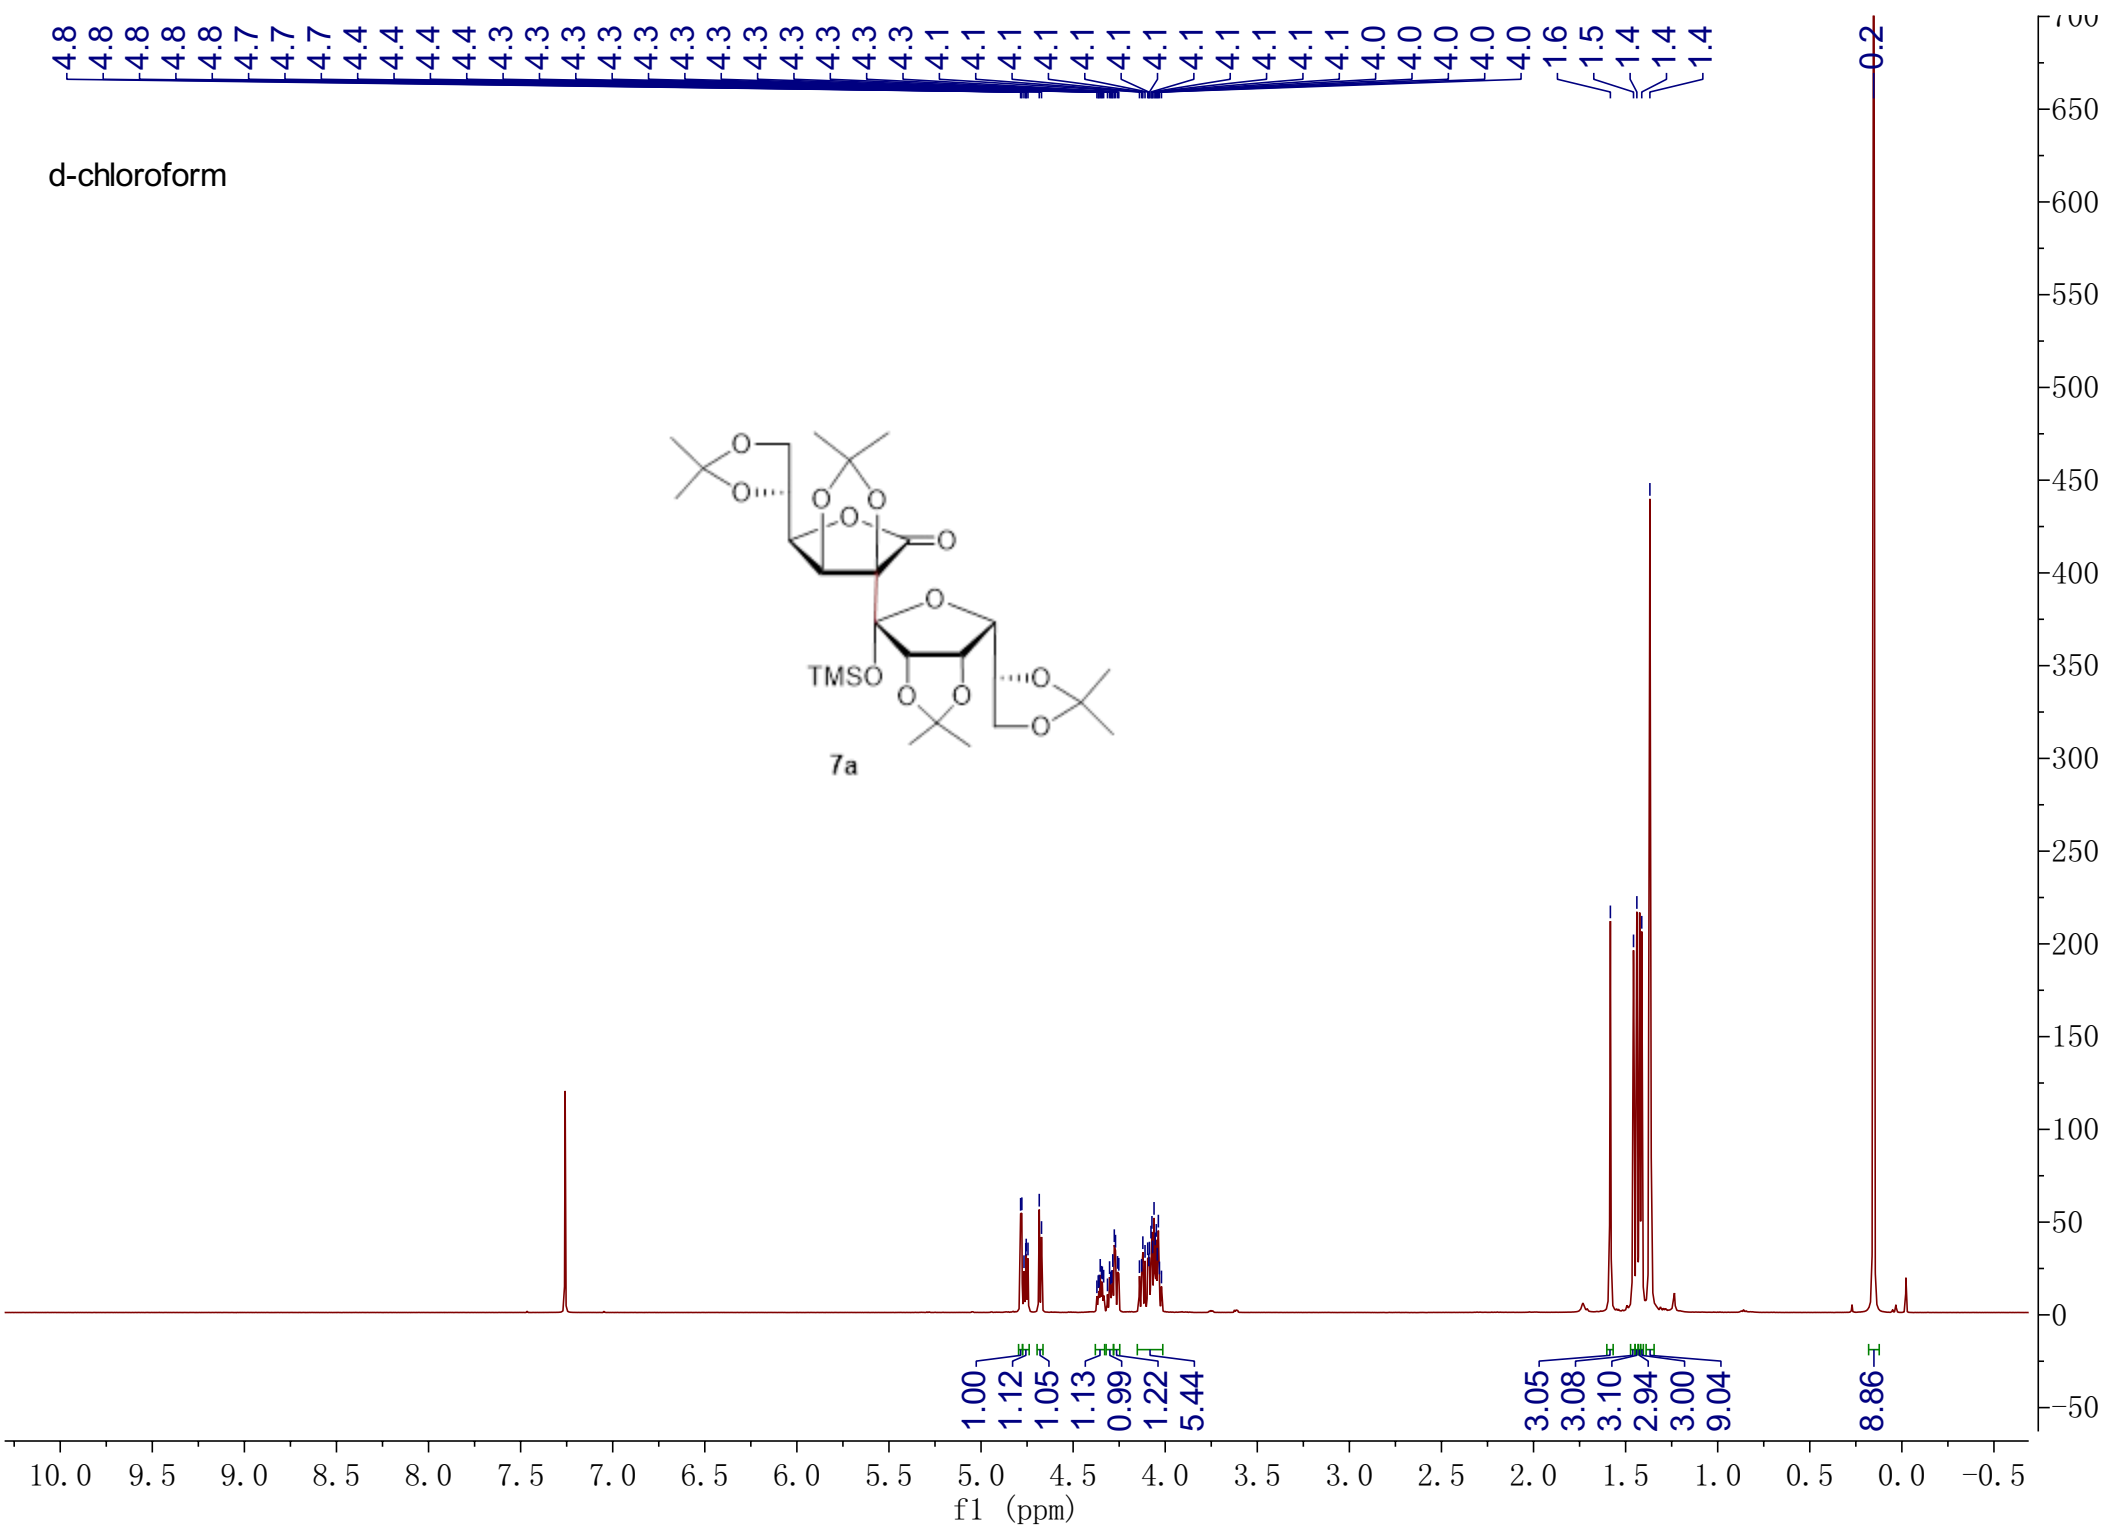

d-chloroform

—172.2

115.0  
112.8  
109.9  
109.6  
105.8  
89.2  
81.0  
80.1  
79.8  
79.5  
78.8  
72.9  
72.6  
67.4  
66.8

27.3  
27.1  
26.9  
26.7  
25.3  
25.3  
25.2  
23.4

—2.0

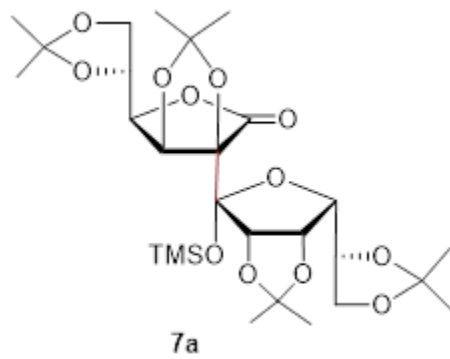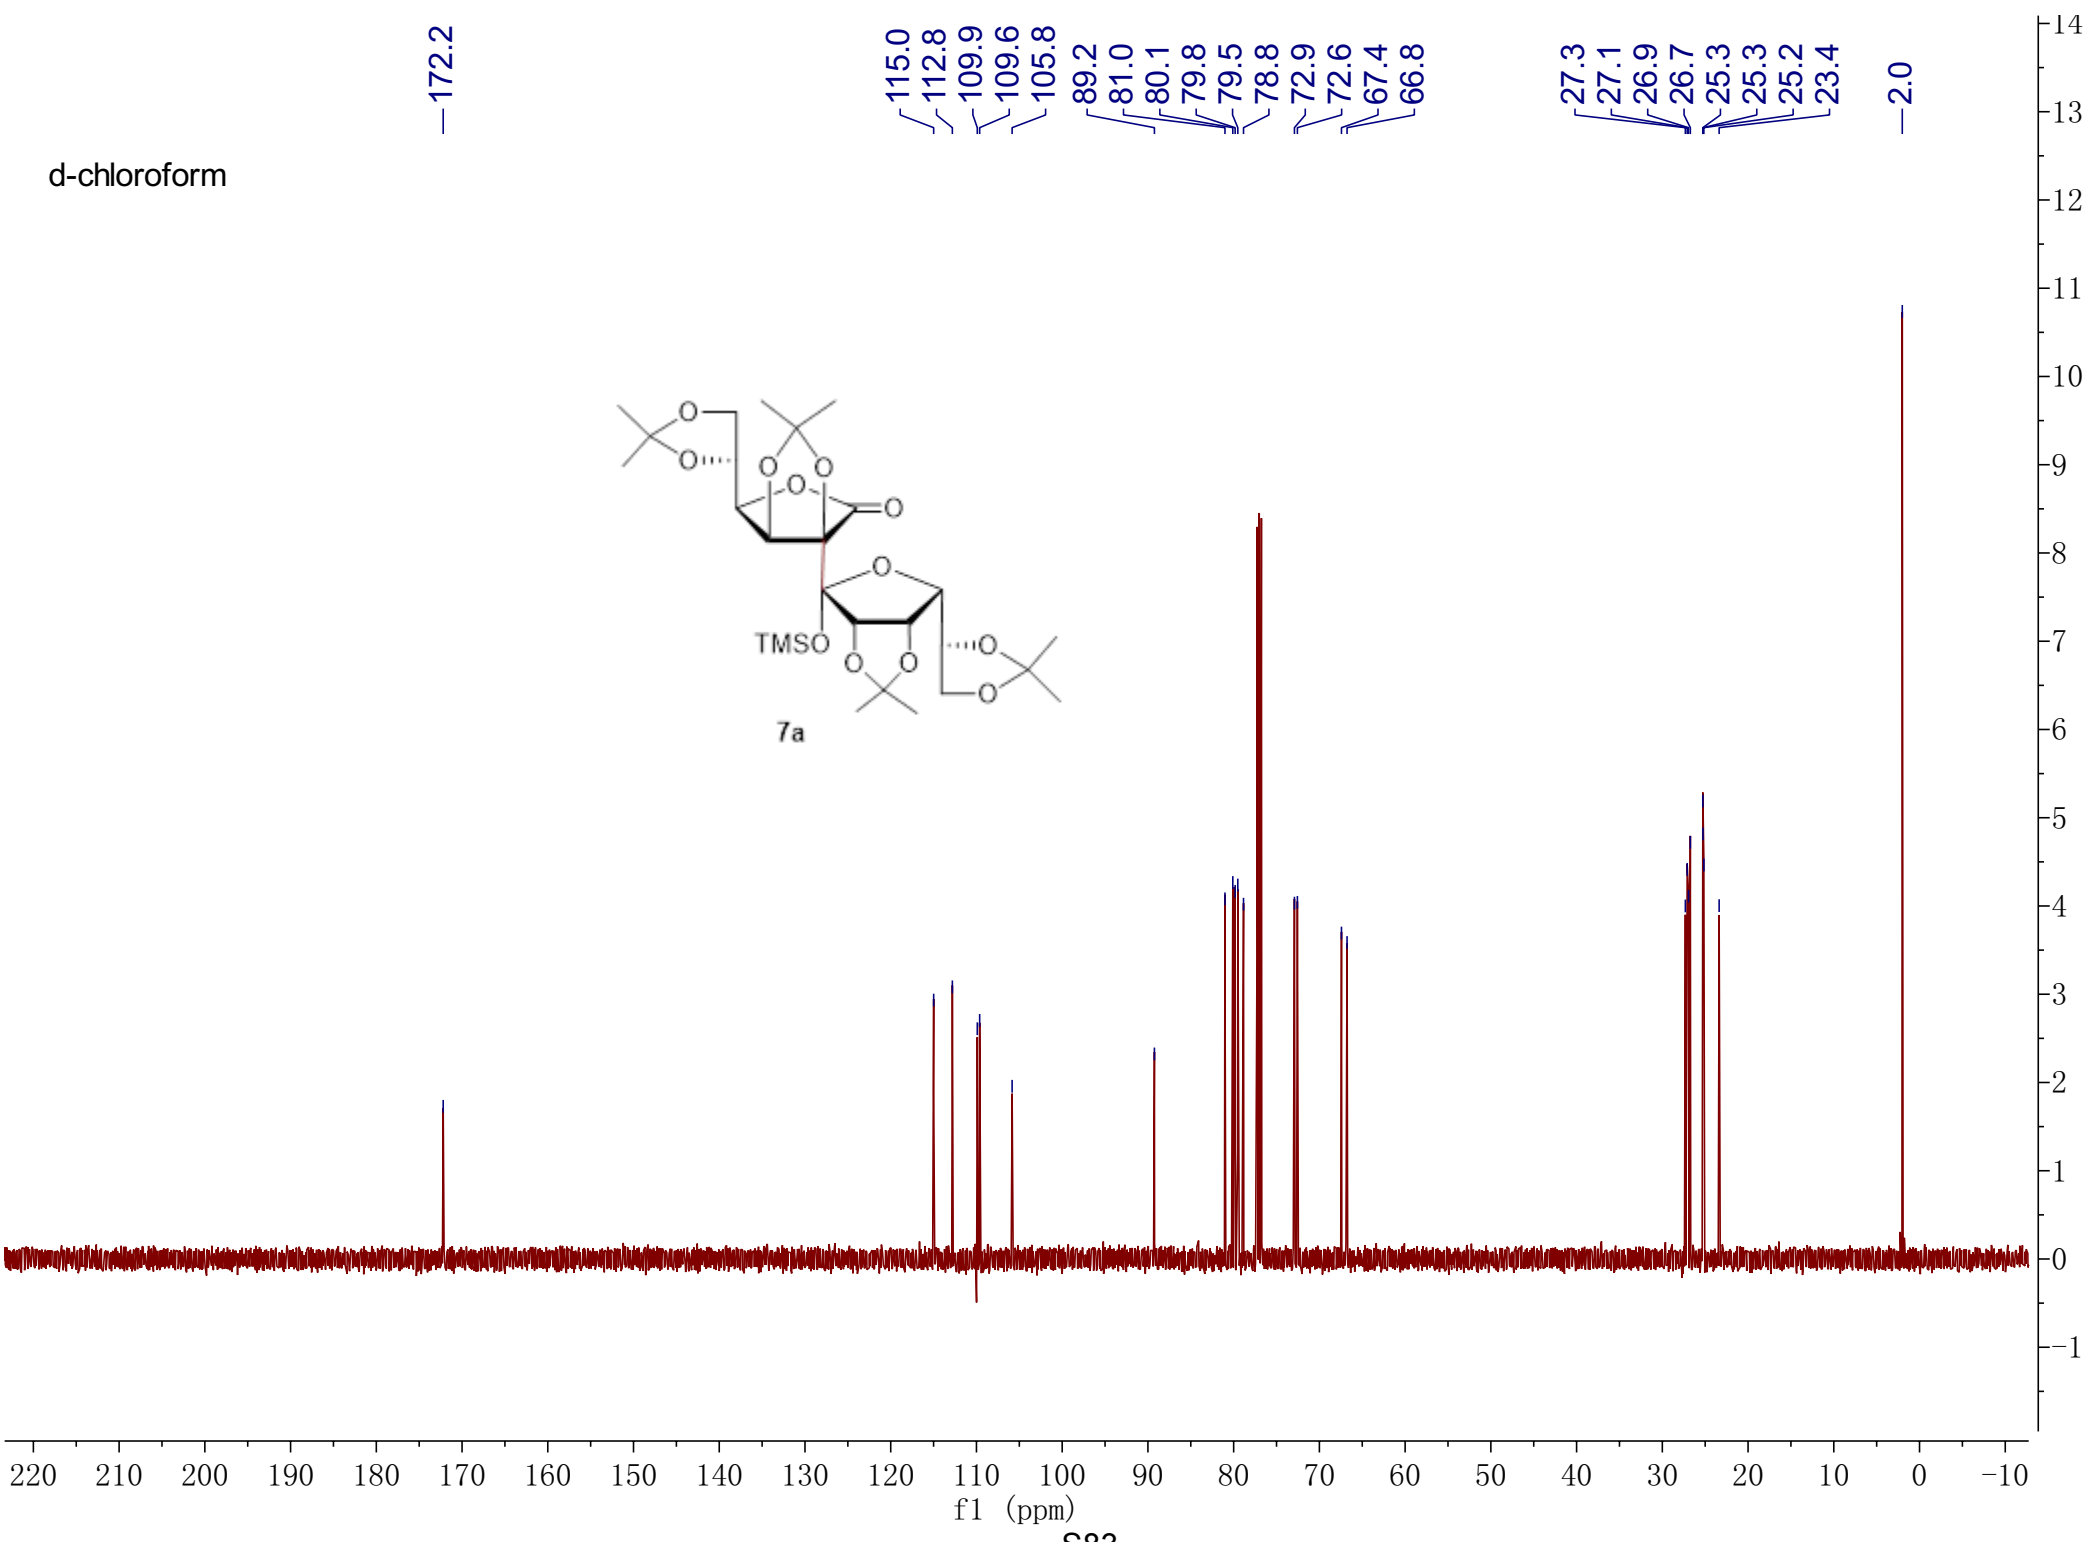

f1 (ppm)  
S83

d-chloroform

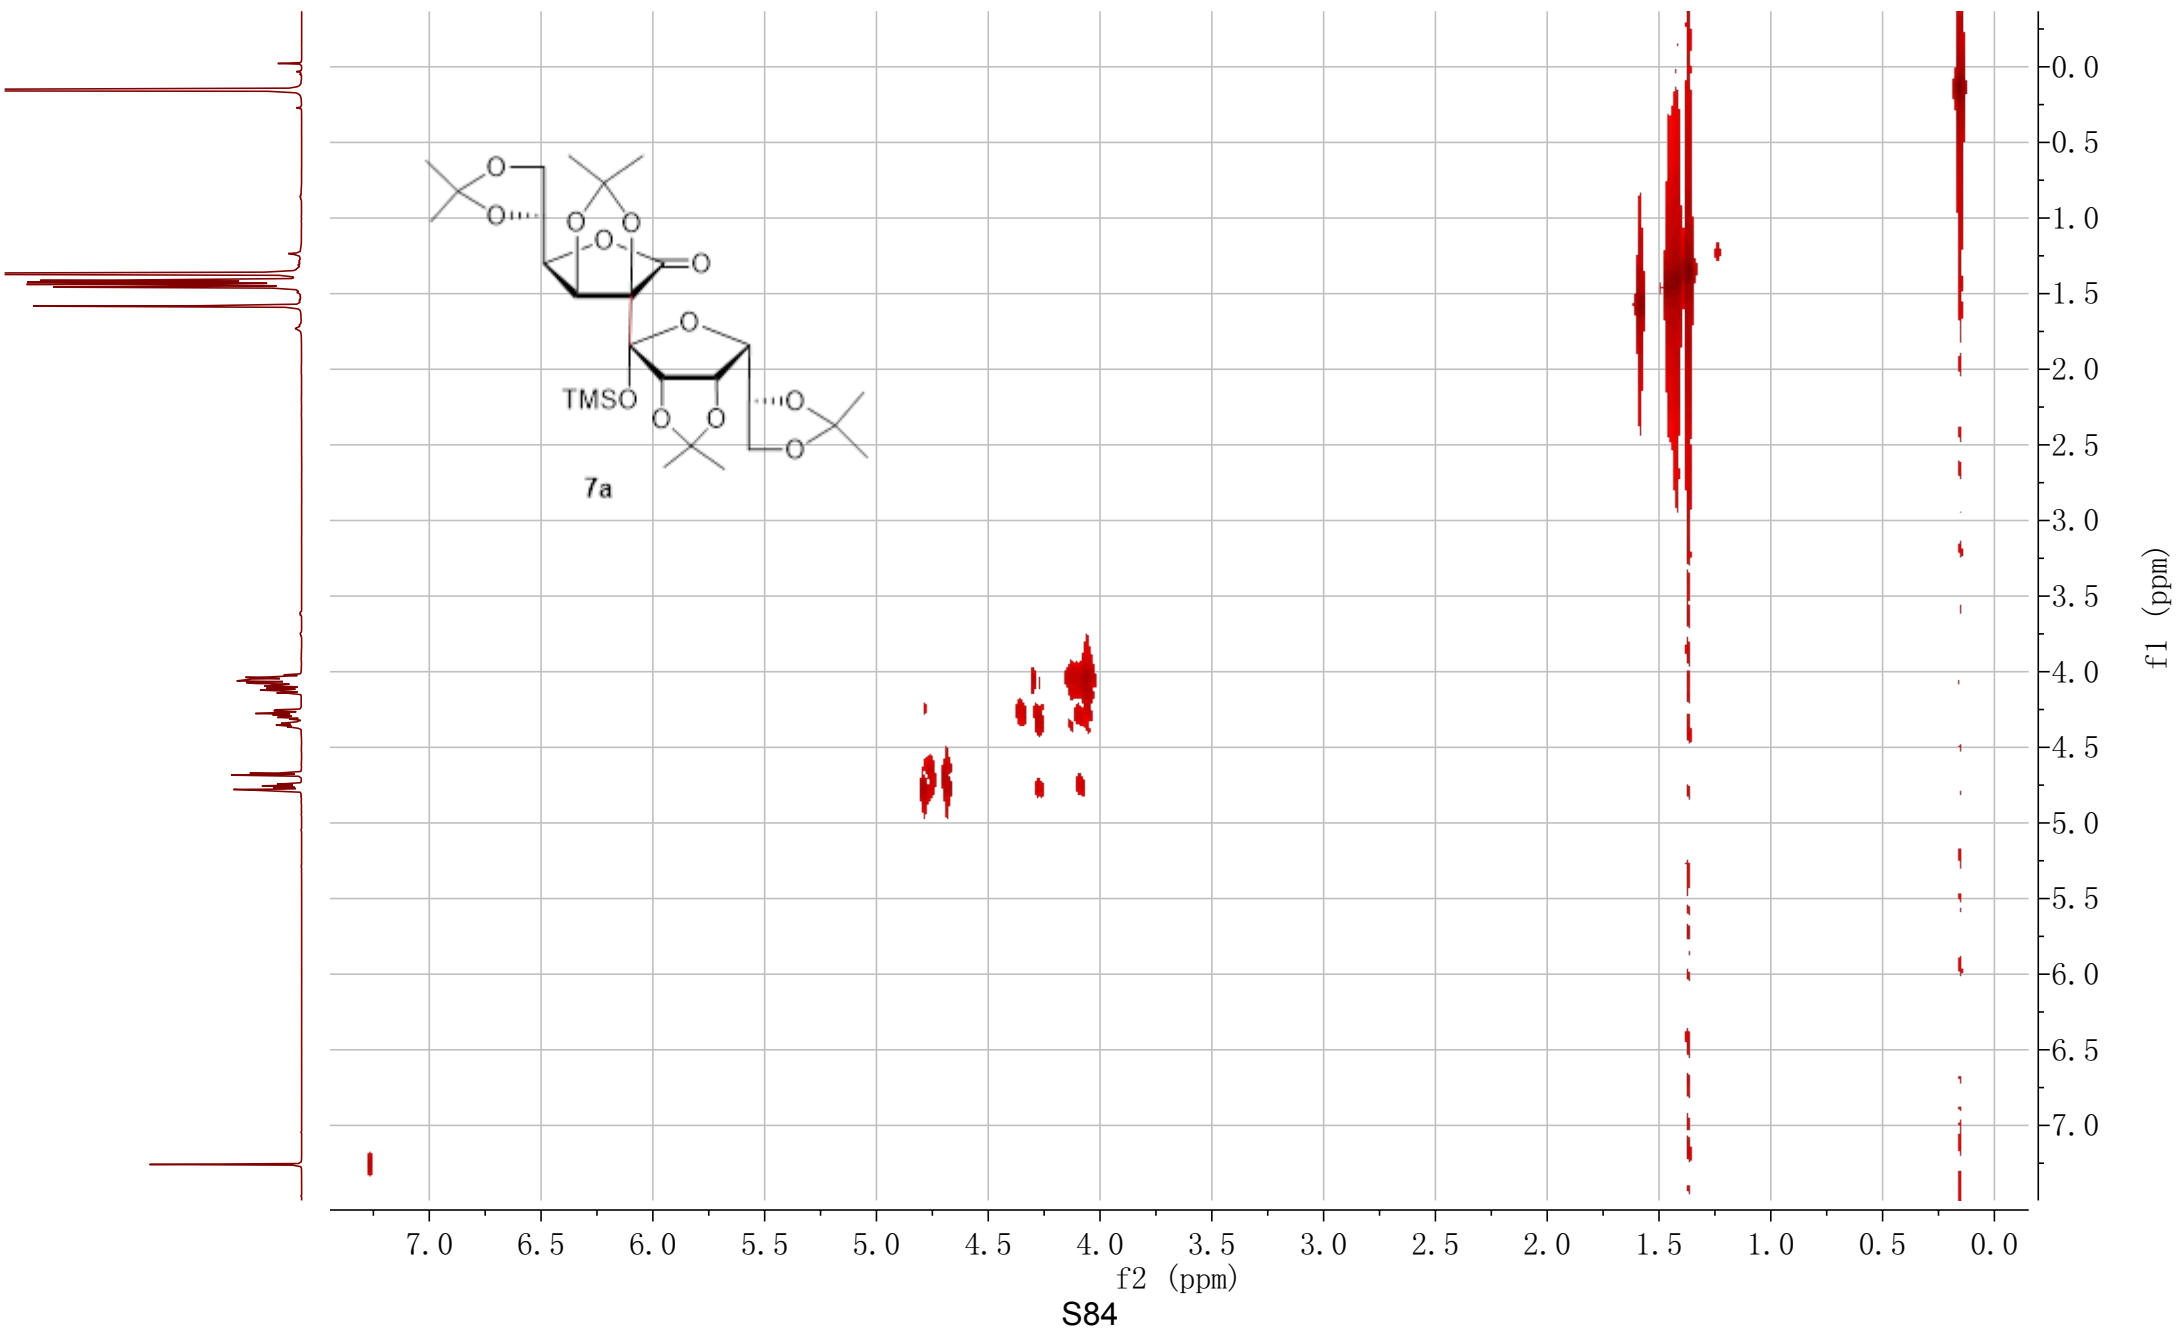

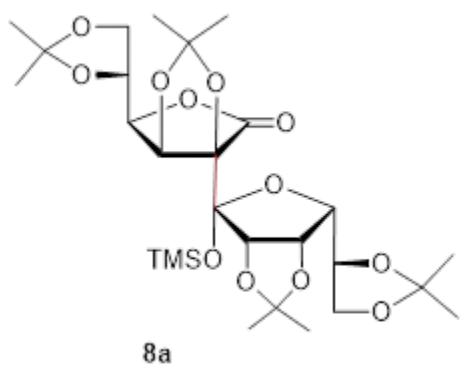

d-chloroform

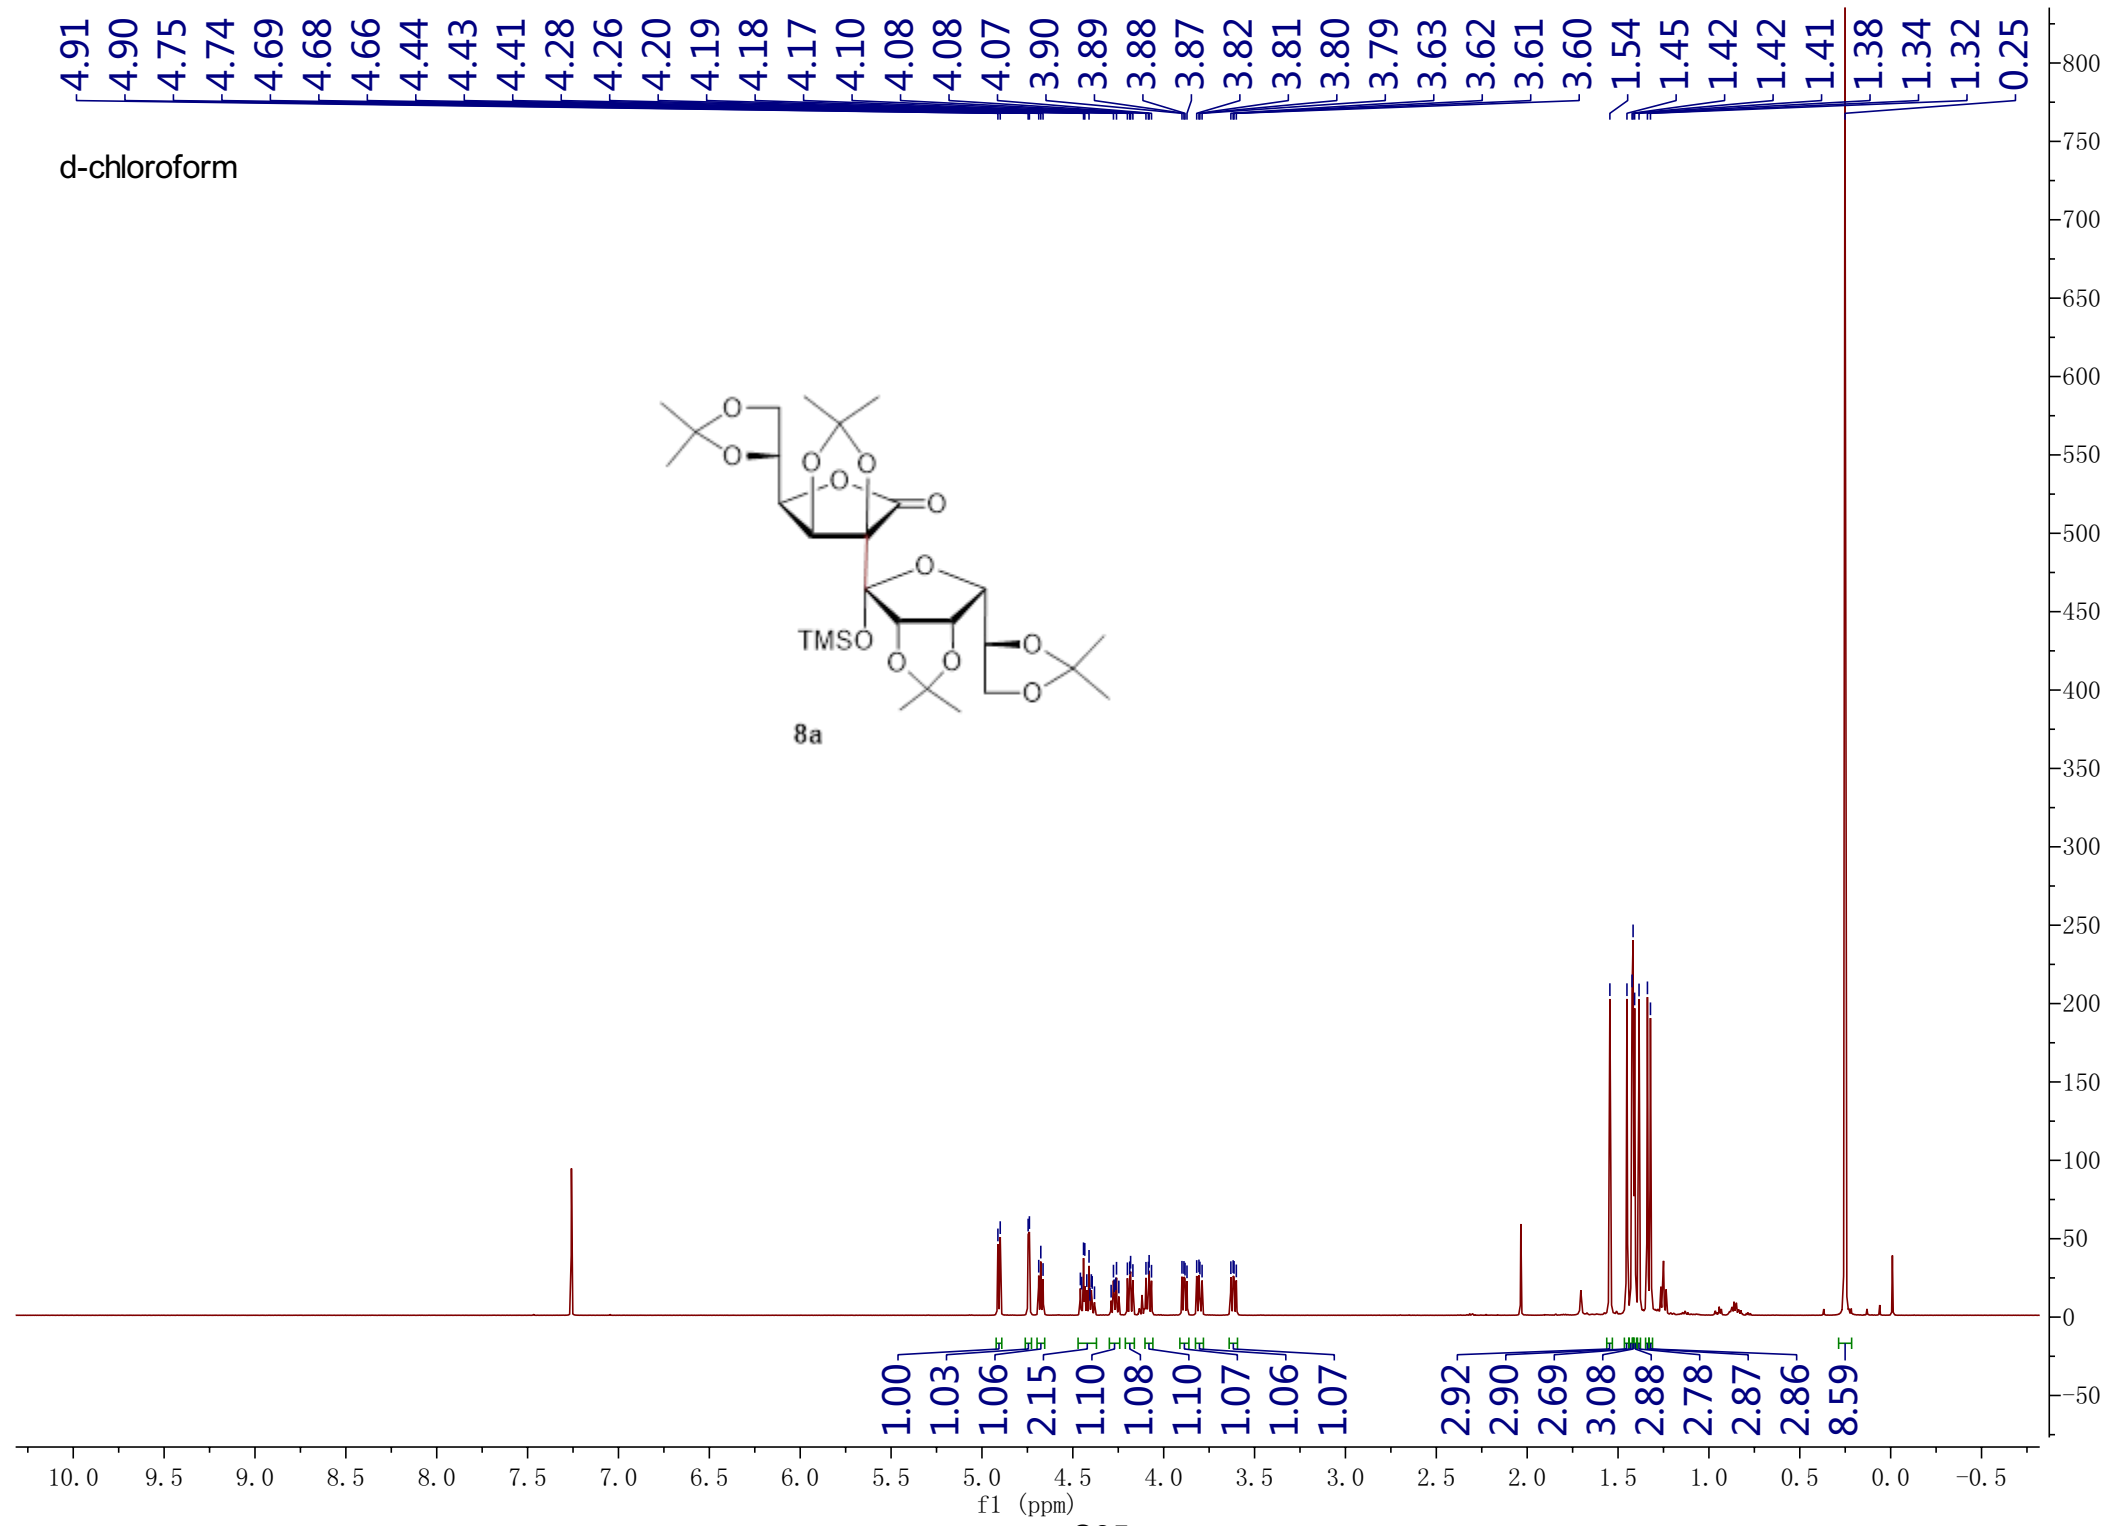

d-chloroform

—173.6

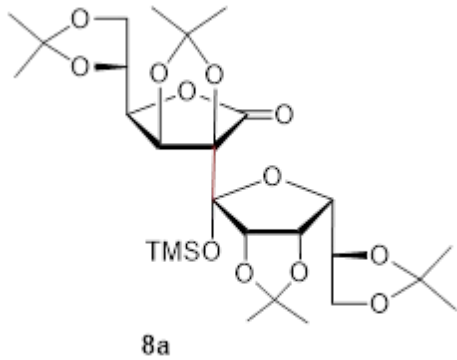

115.2  
112.9  
110.4  
109.5  
106.2  
88.9  
81.7  
81.6  
80.8  
80.4  
78.8  
76.4  
75.1  
66.0  
65.1  
27.3  
26.9  
26.7  
26.6  
25.4  
25.3  
25.2  
23.5

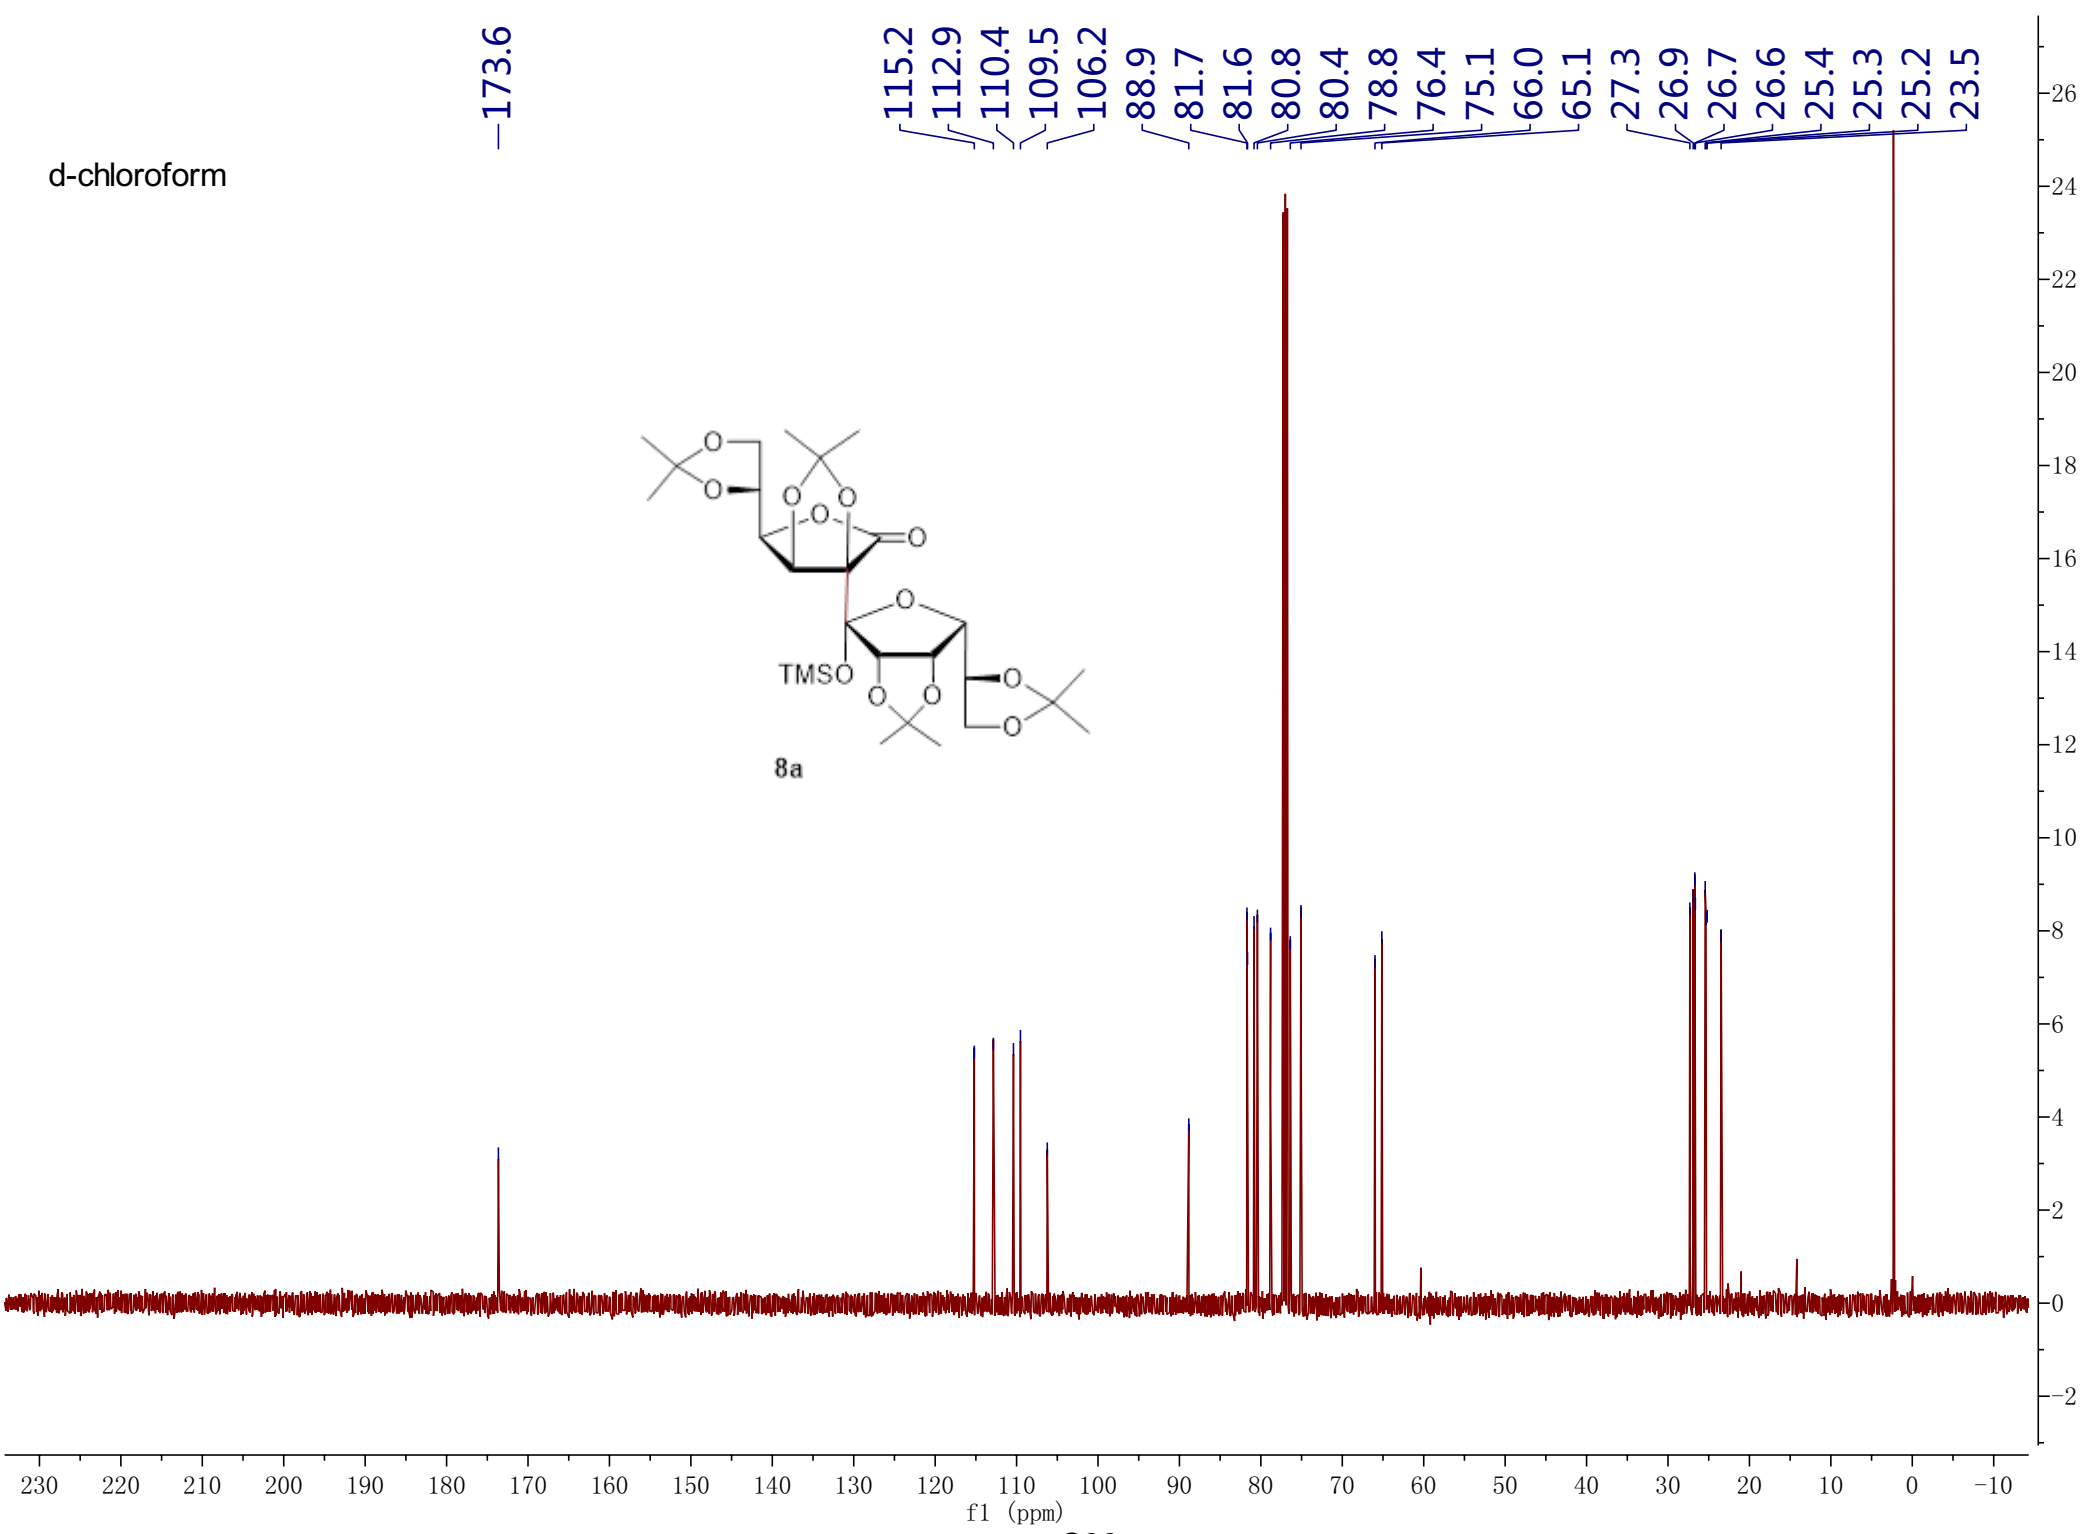

COSY  
d-chloroform

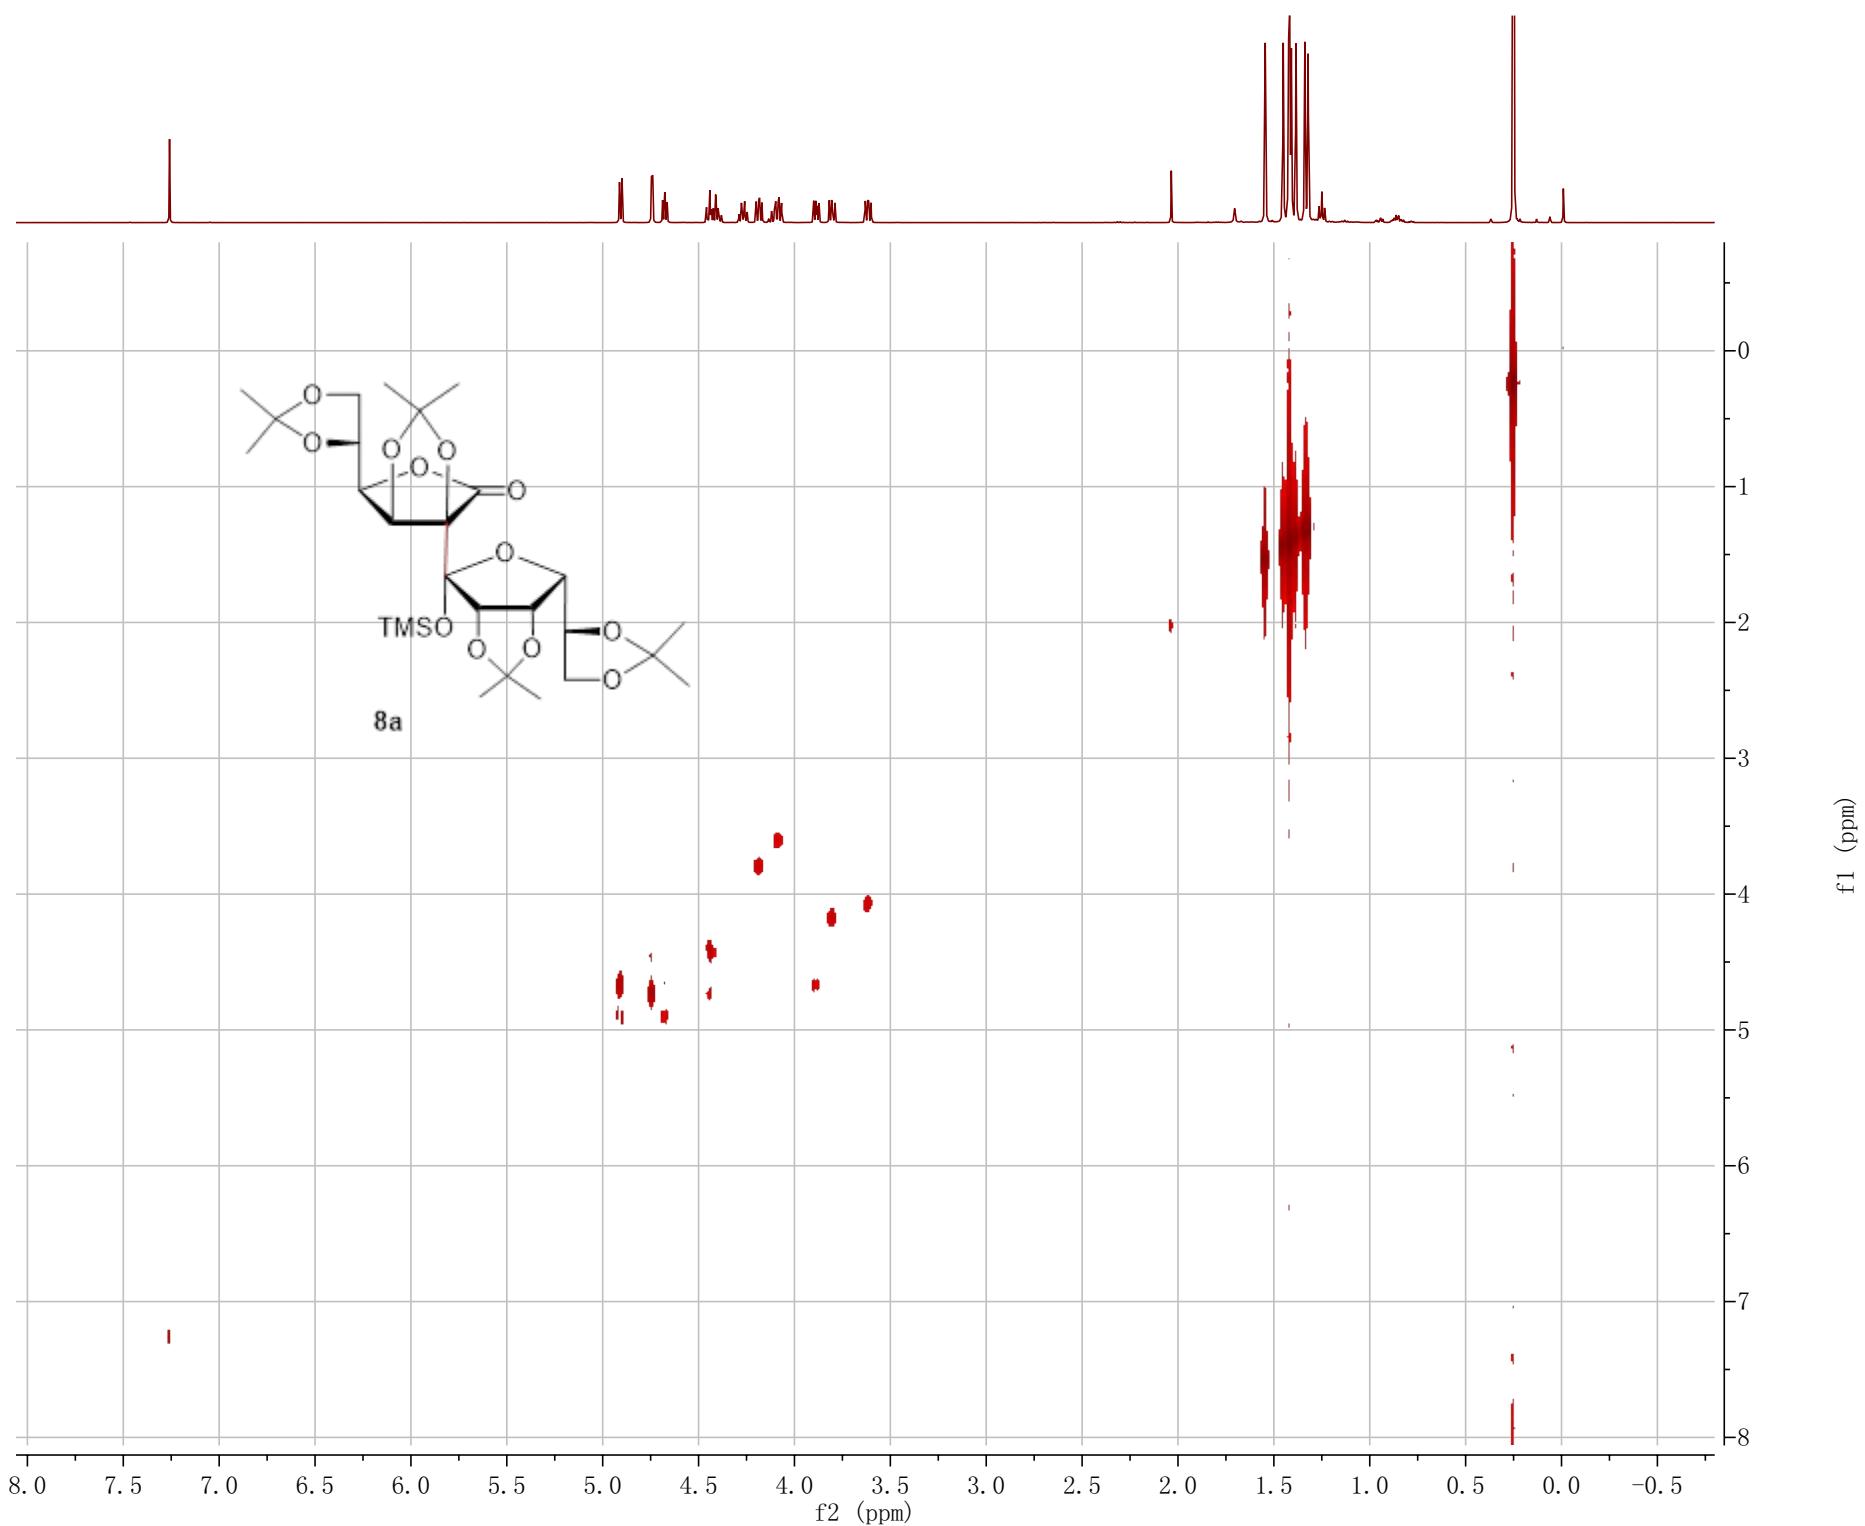

S87

d-chloroform

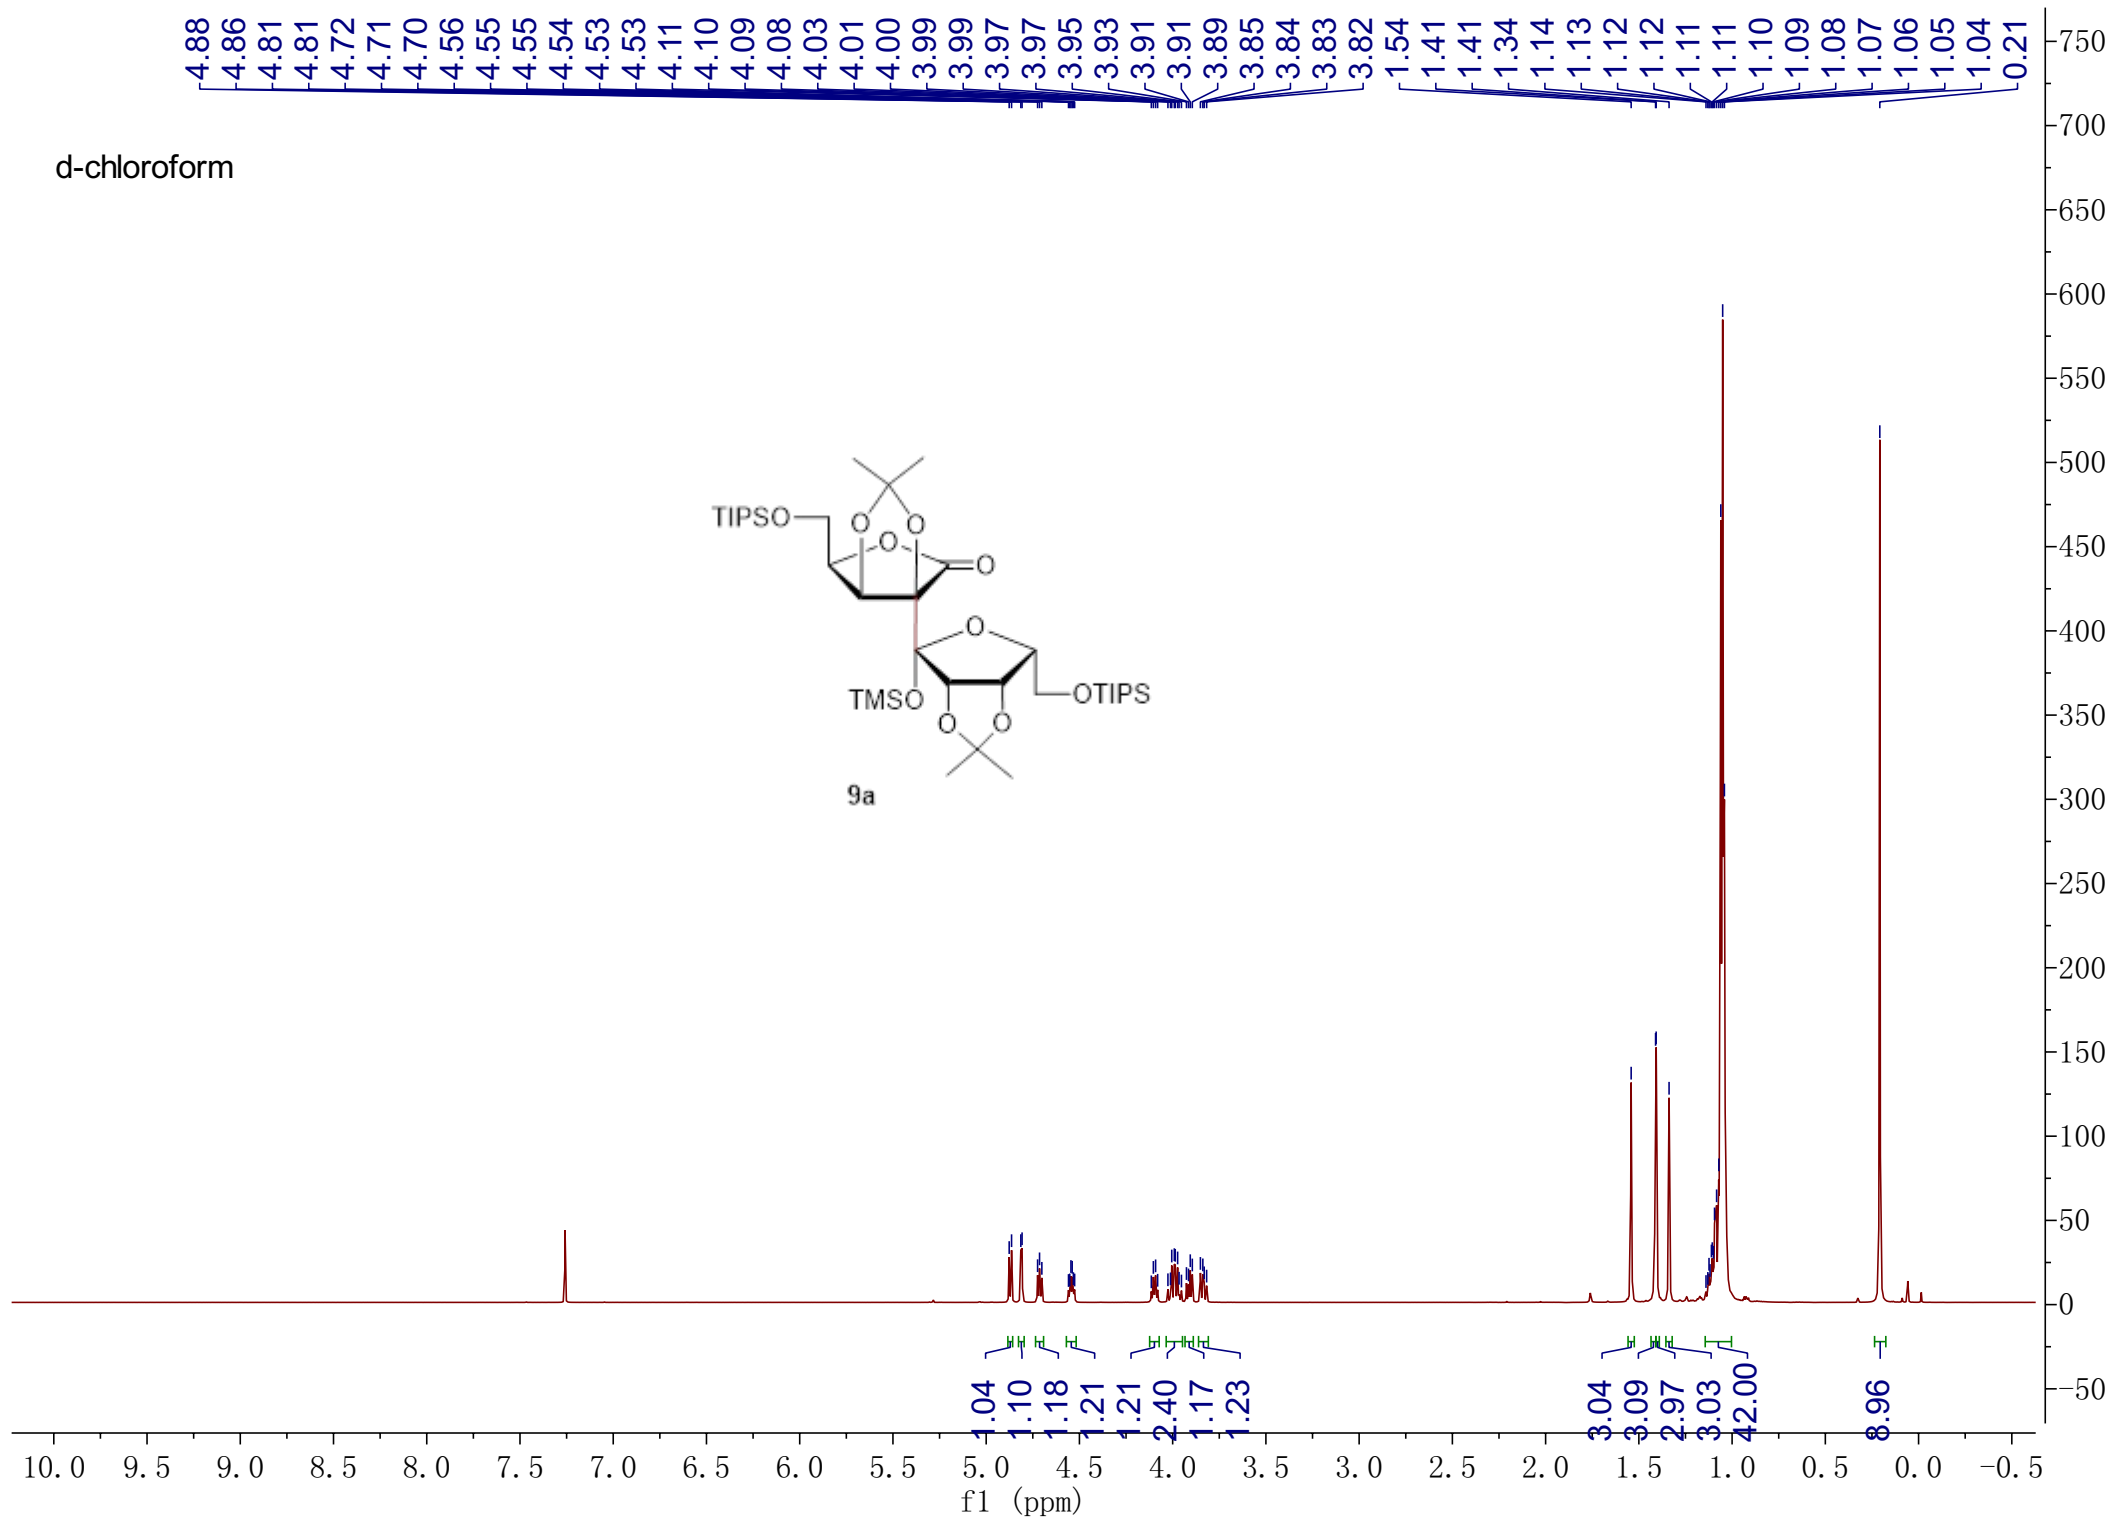



d-chloroform

—174.1

—114.1

—112.3

—105.6

—88.8

—80.9

—80.5

—80.1

—80.0

—78.8

—62.0

—60.9

—27.2

—26.5

—25.2

—23.5

—17.9

—17.8

—11.9

—11.9

—11.9

—2.1

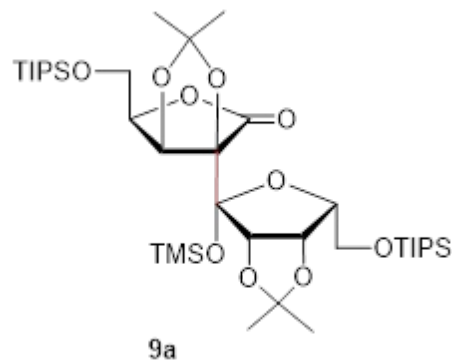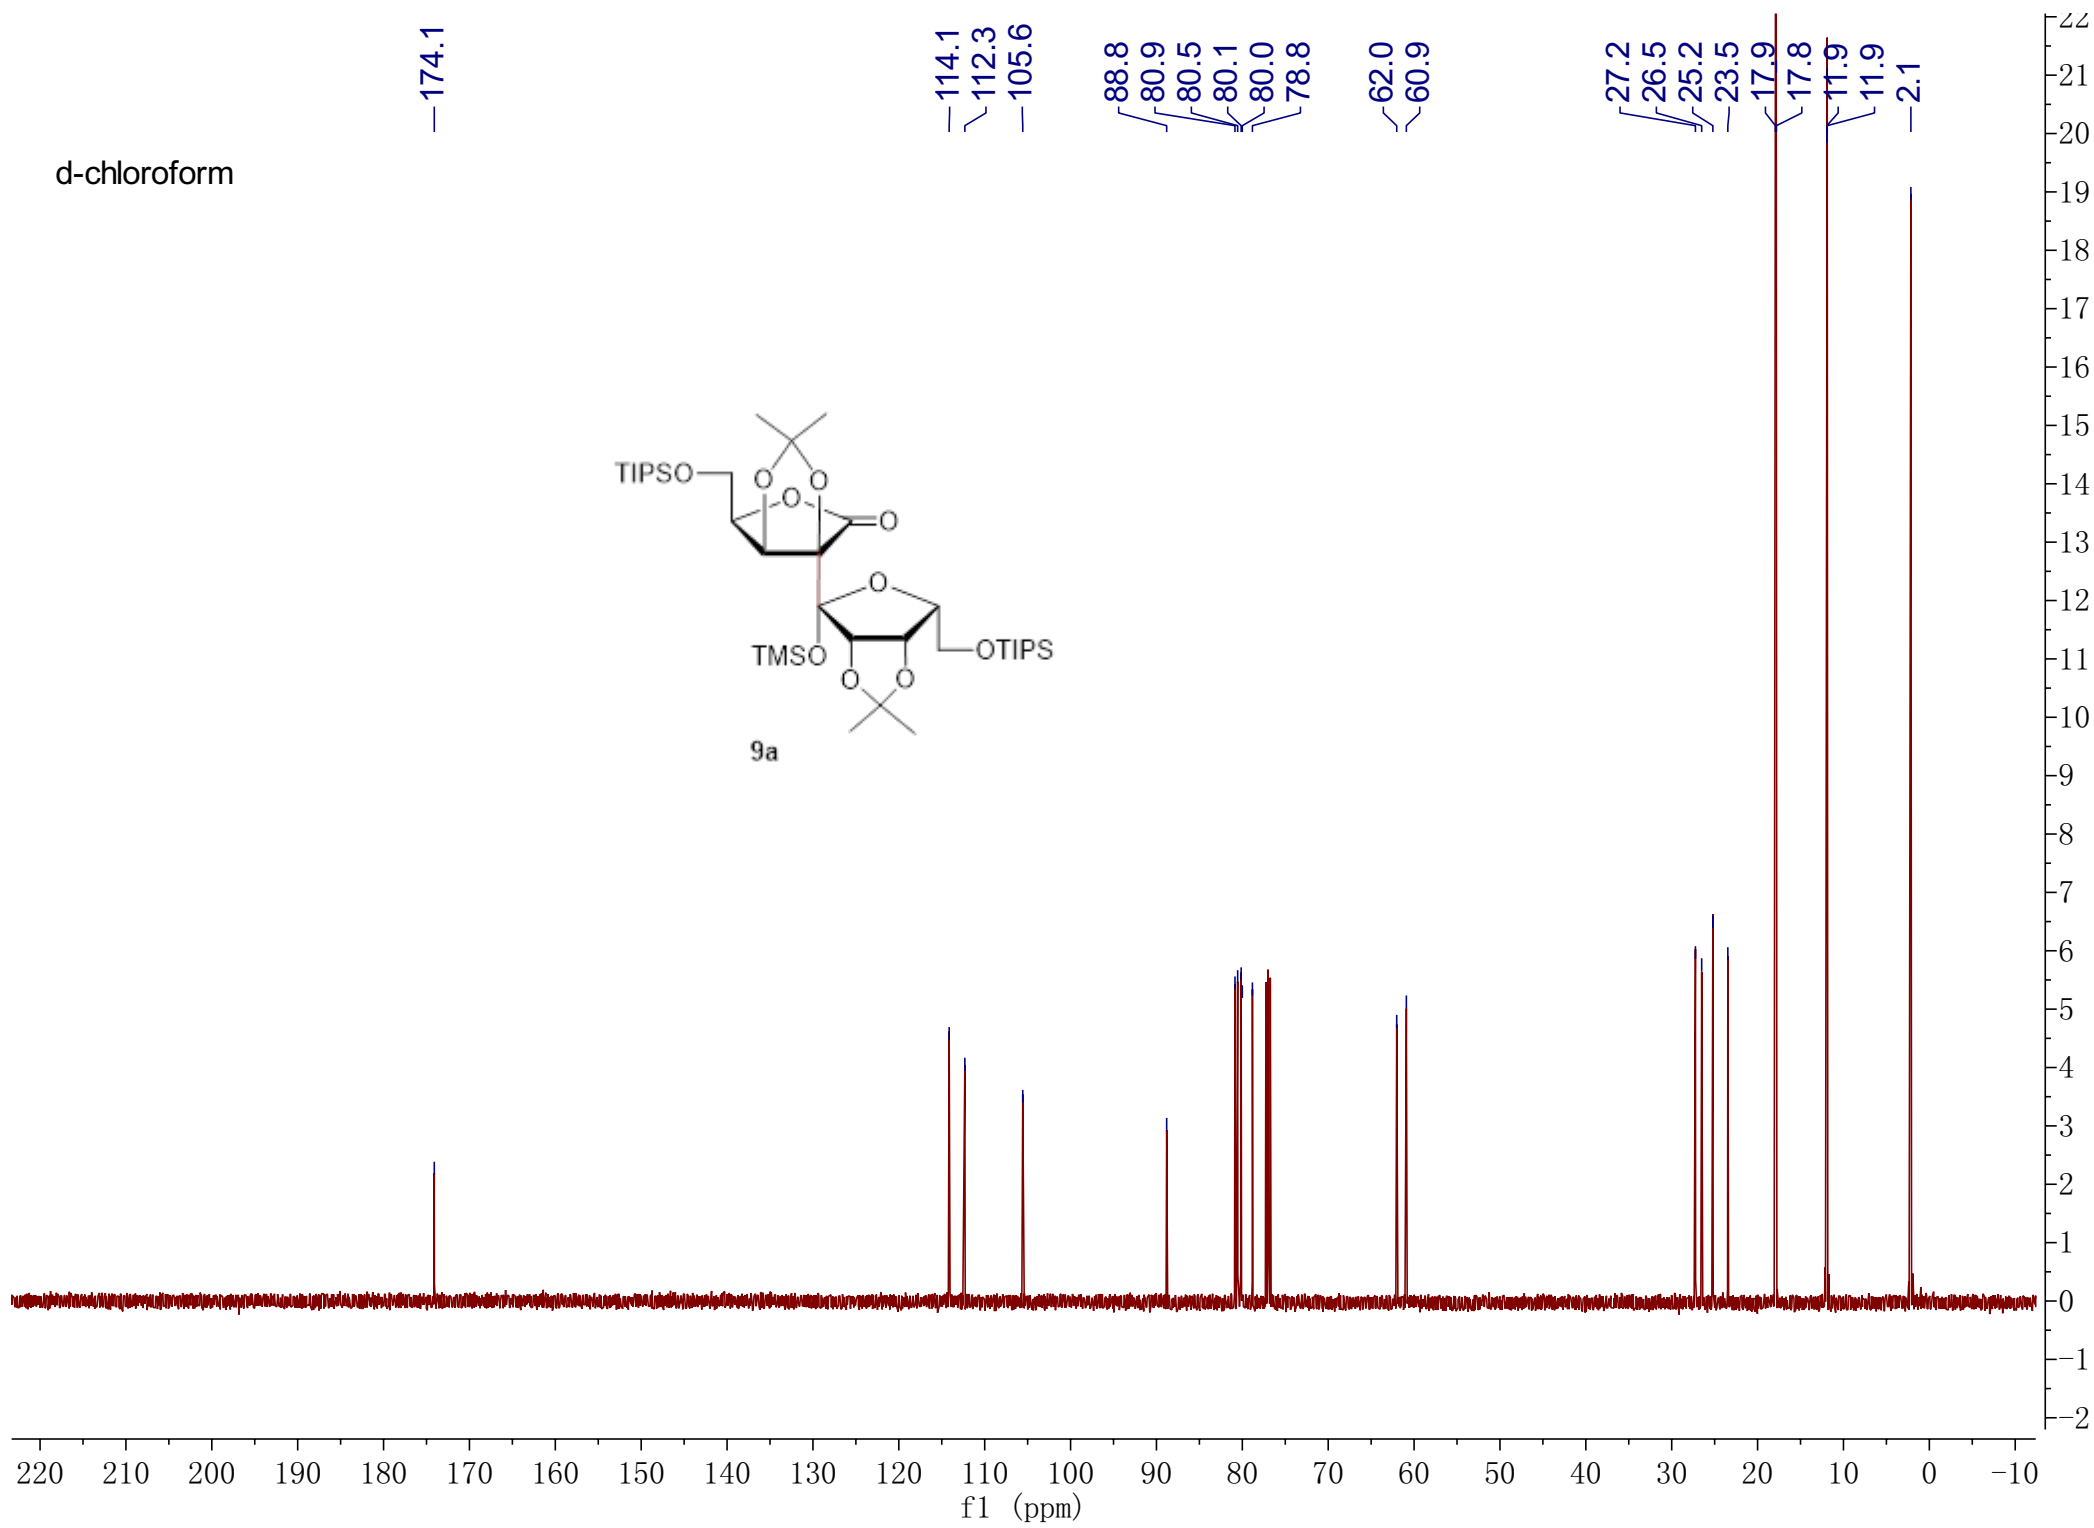

4.89  
4.88  
4.73  
4.72  
4.67  
4.66  
4.65  
4.44  
4.43  
4.42  
4.42  
4.41  
4.39  
4.38  
4.36  
4.27  
4.26  
4.24  
4.23  
4.18  
4.17  
4.15  
4.08  
4.07  
4.05  
3.89  
3.87  
3.86  
3.80  
3.79  
3.77  
3.62  
3.60  
3.59  
1.53  
1.43  
1.40  
1.40  
1.37  
1.32  
1.31

d-chloroform

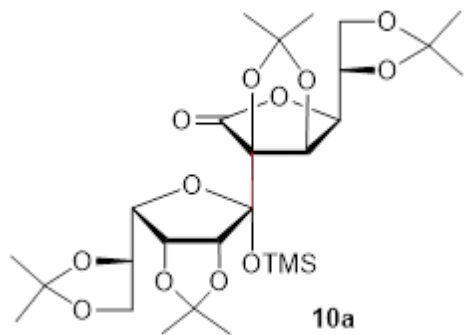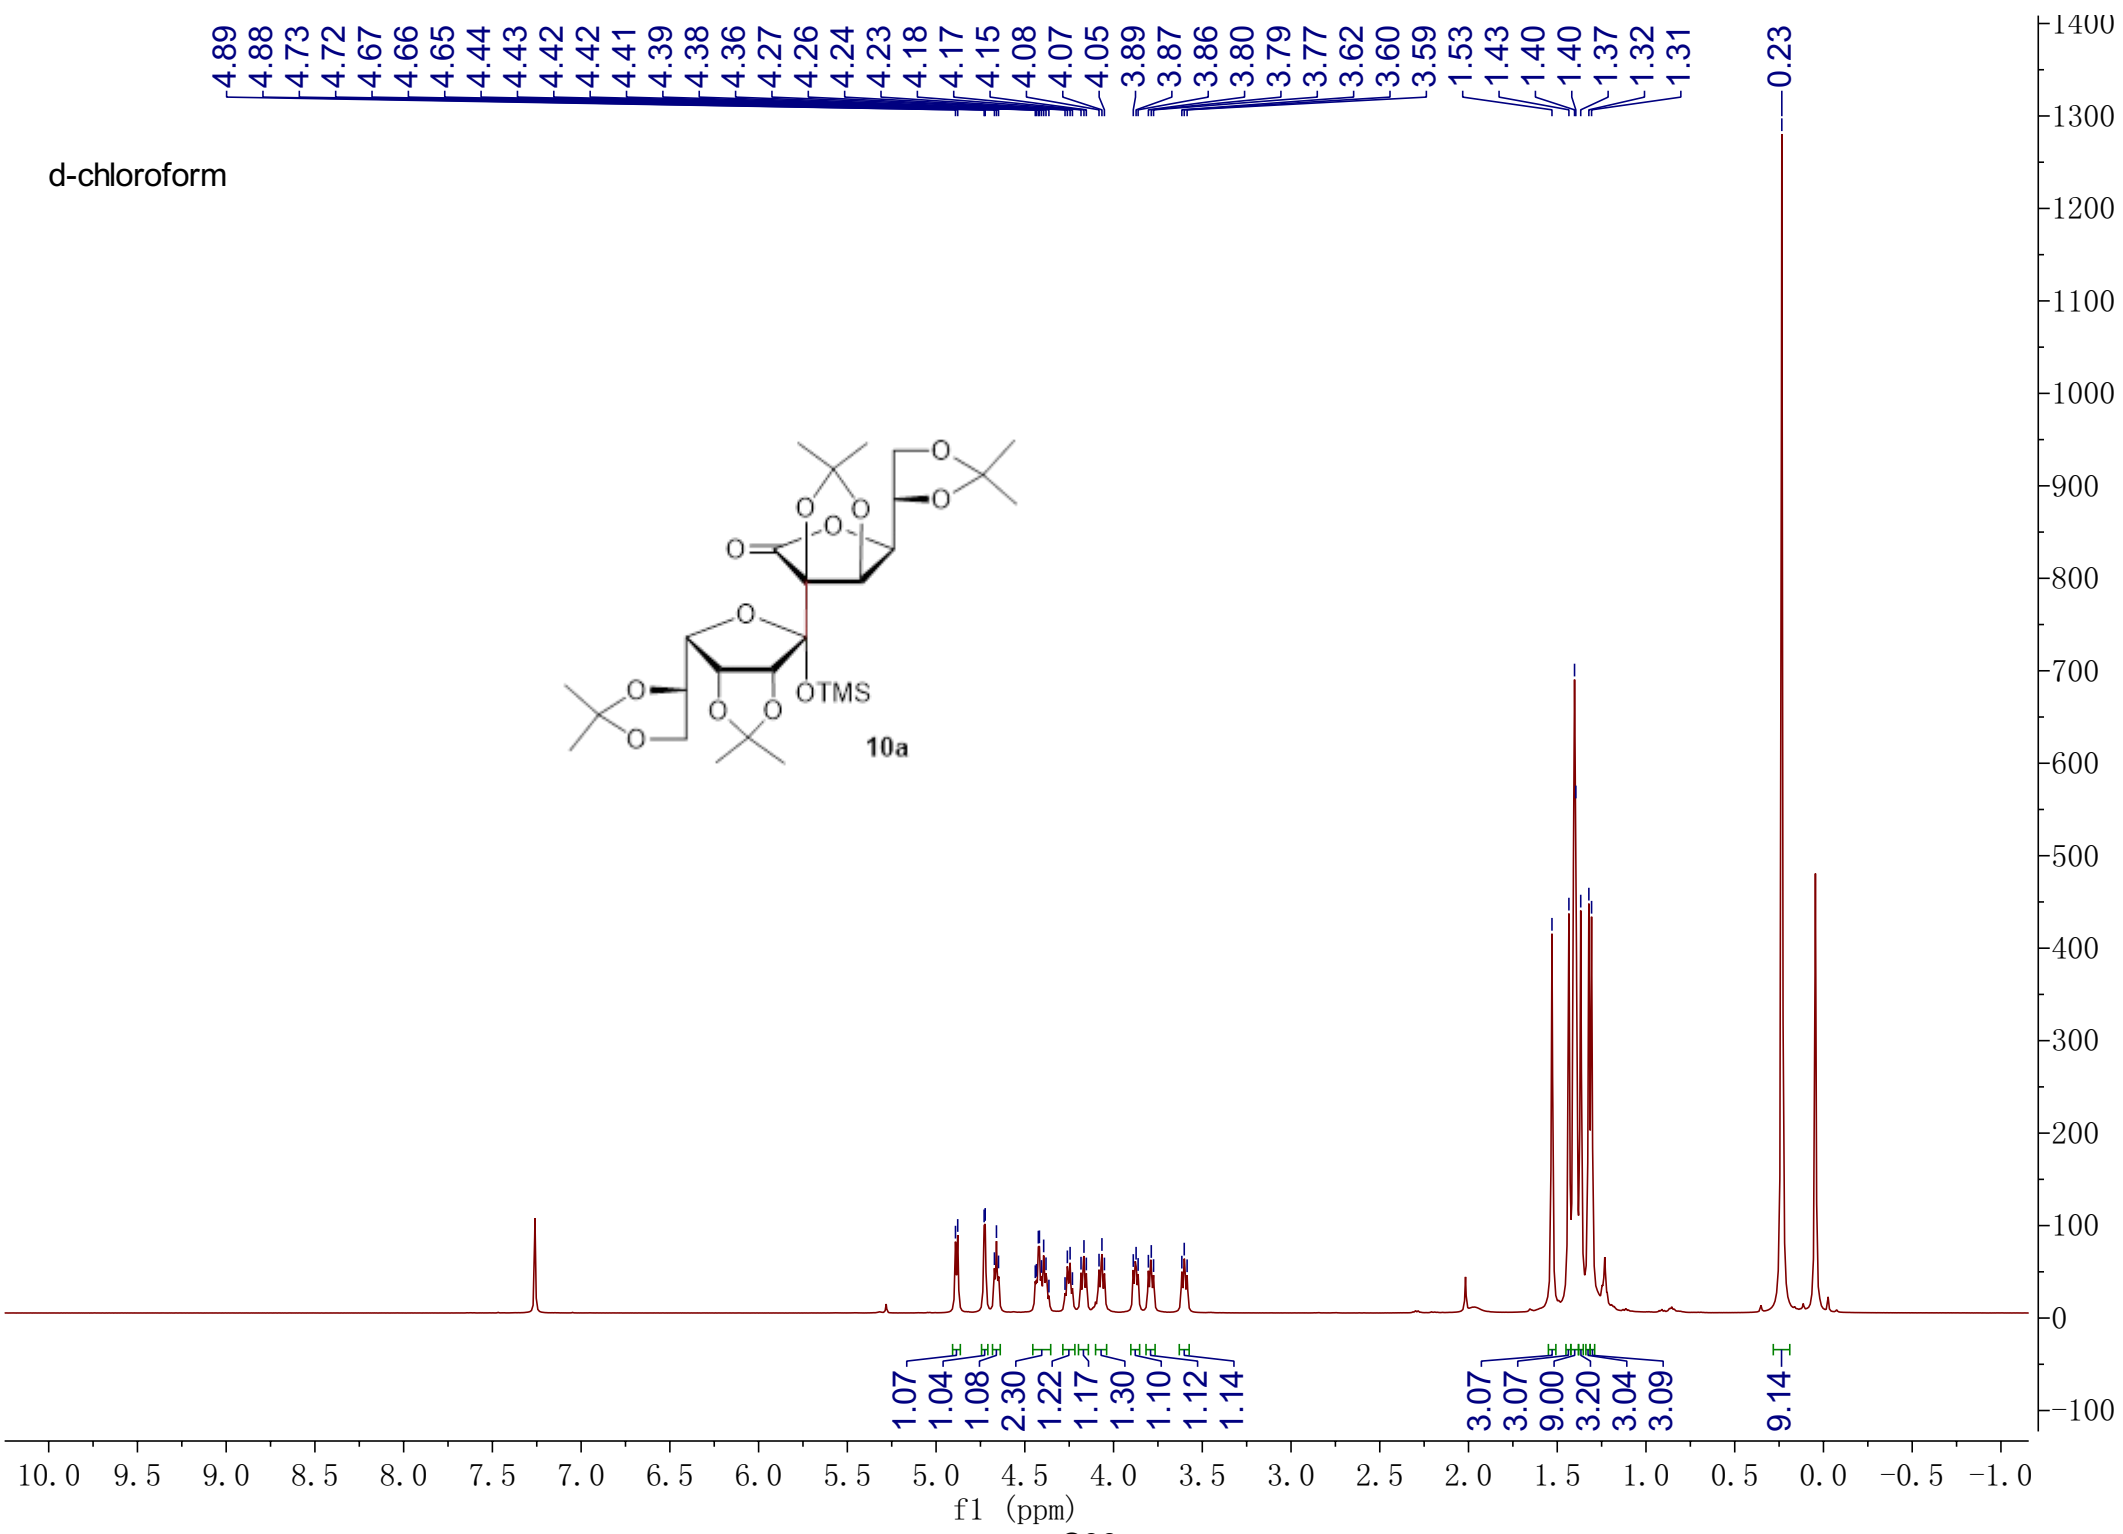

f1 (ppm)  
S90

d-chloroform

—173.6

115.2  
112.8  
110.4  
109.5  
106.2

88.8  
81.7  
81.6  
80.8  
80.4  
78.8  
76.4  
75.1  
66.0  
65.1

27.3  
26.9  
26.7  
26.6  
25.4  
25.3  
25.2  
23.5

—2.3

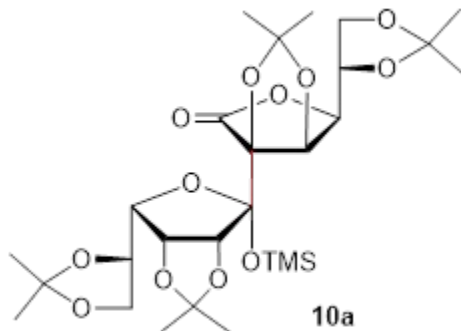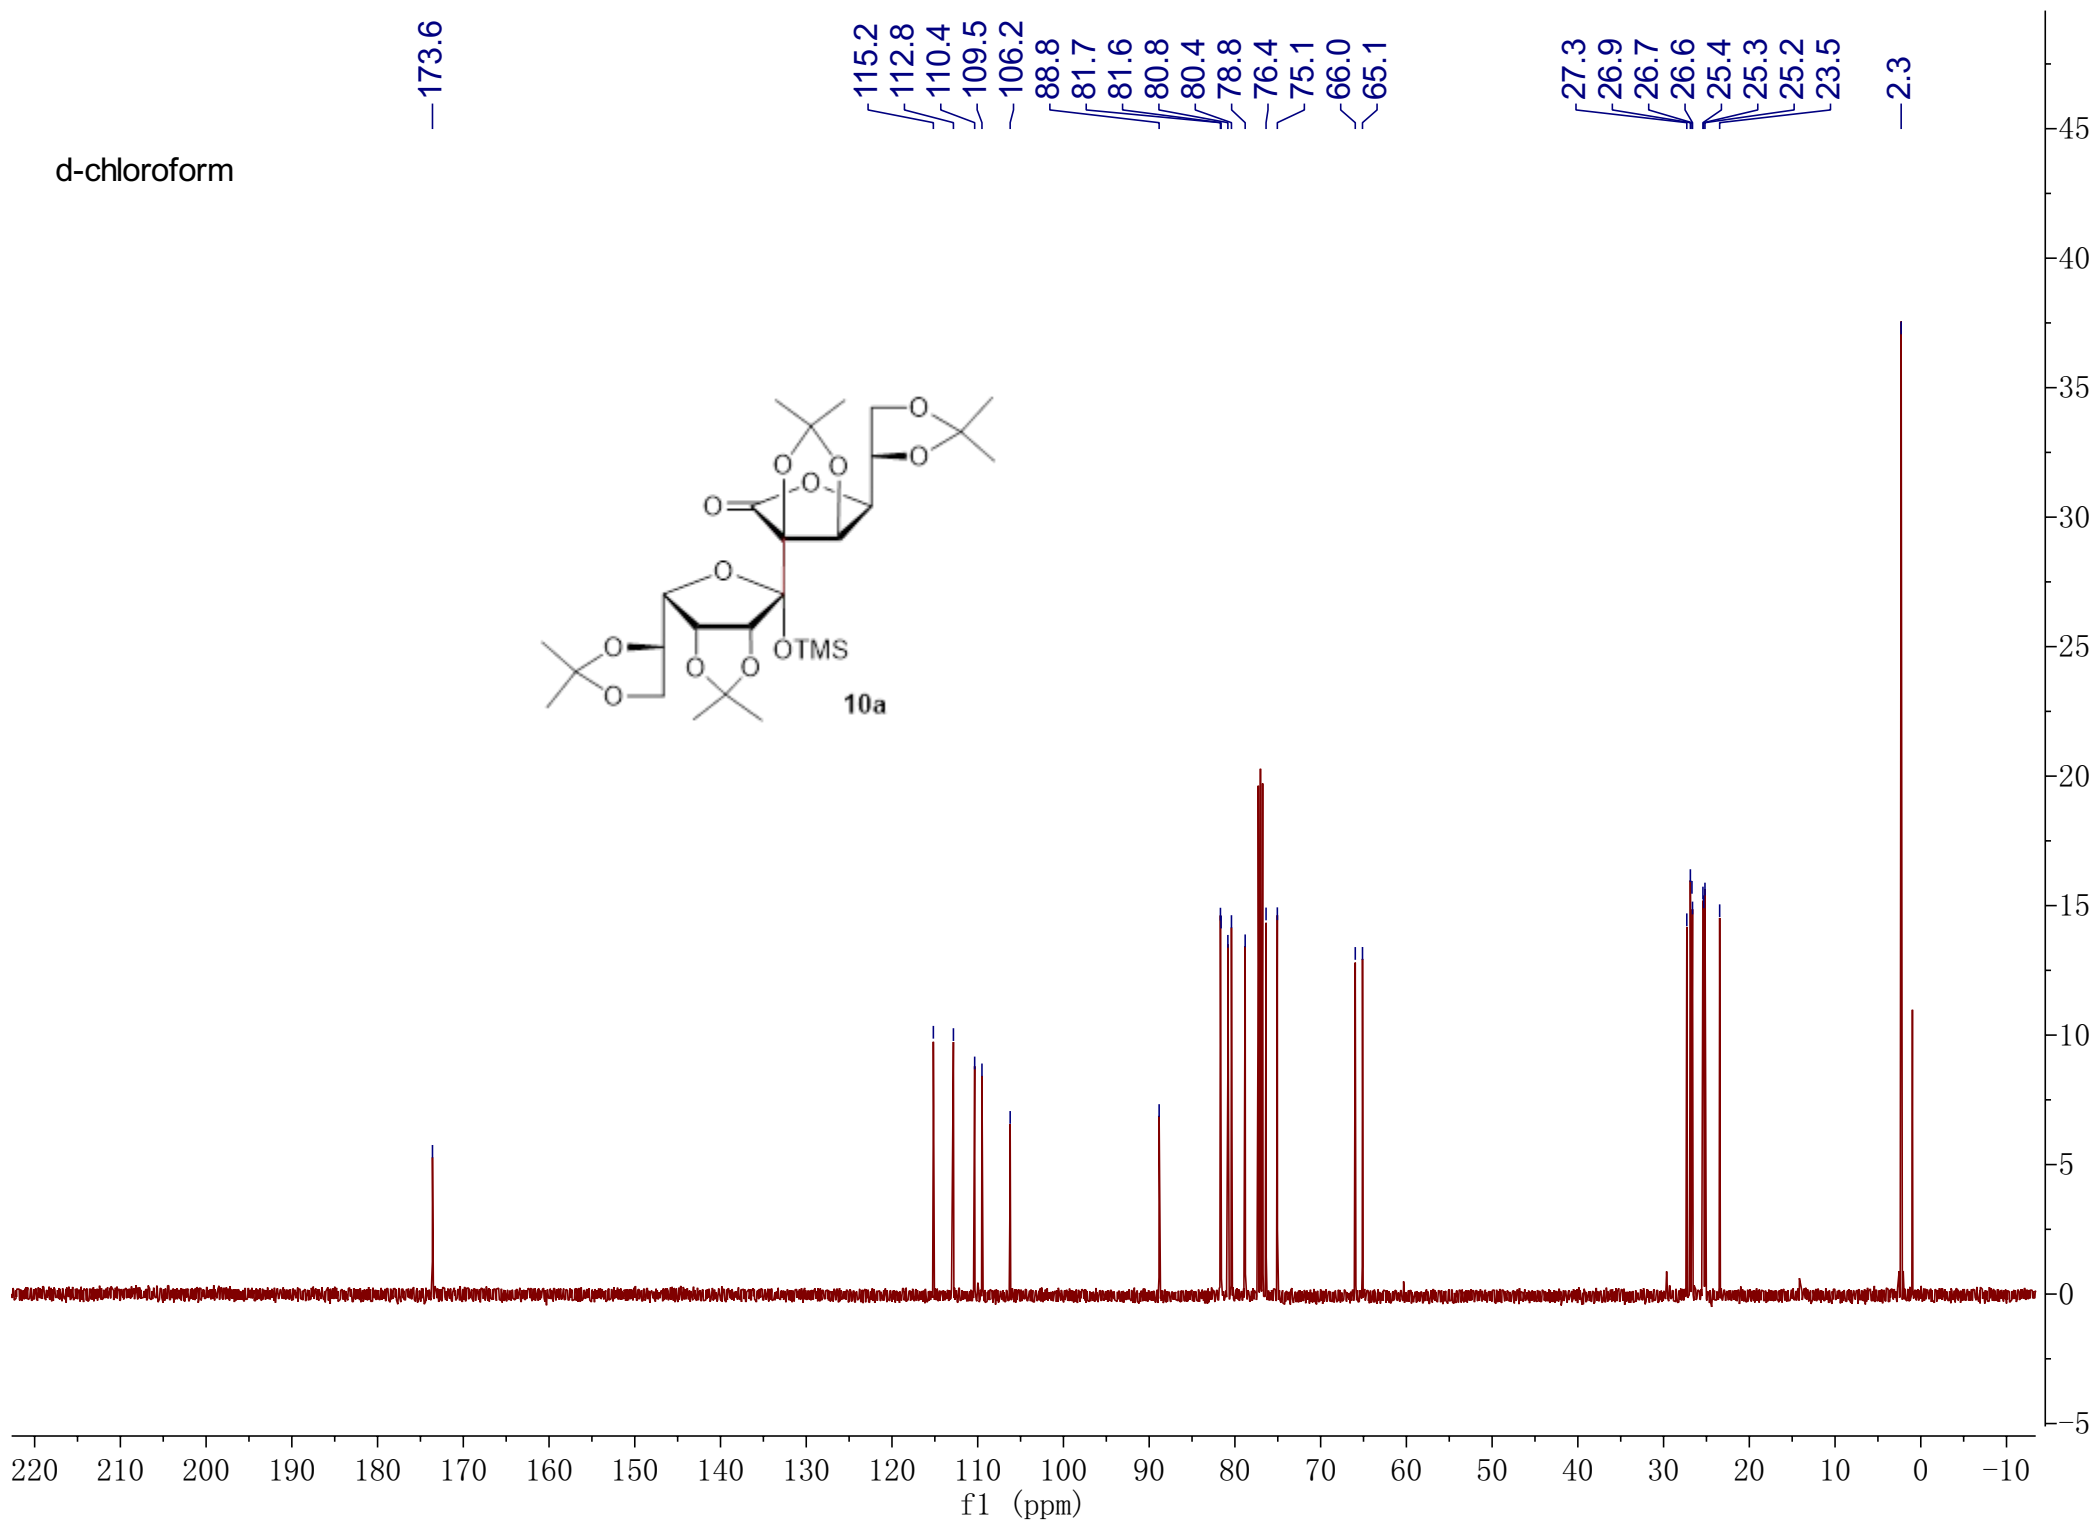

S91

COSY  
d-chloroform

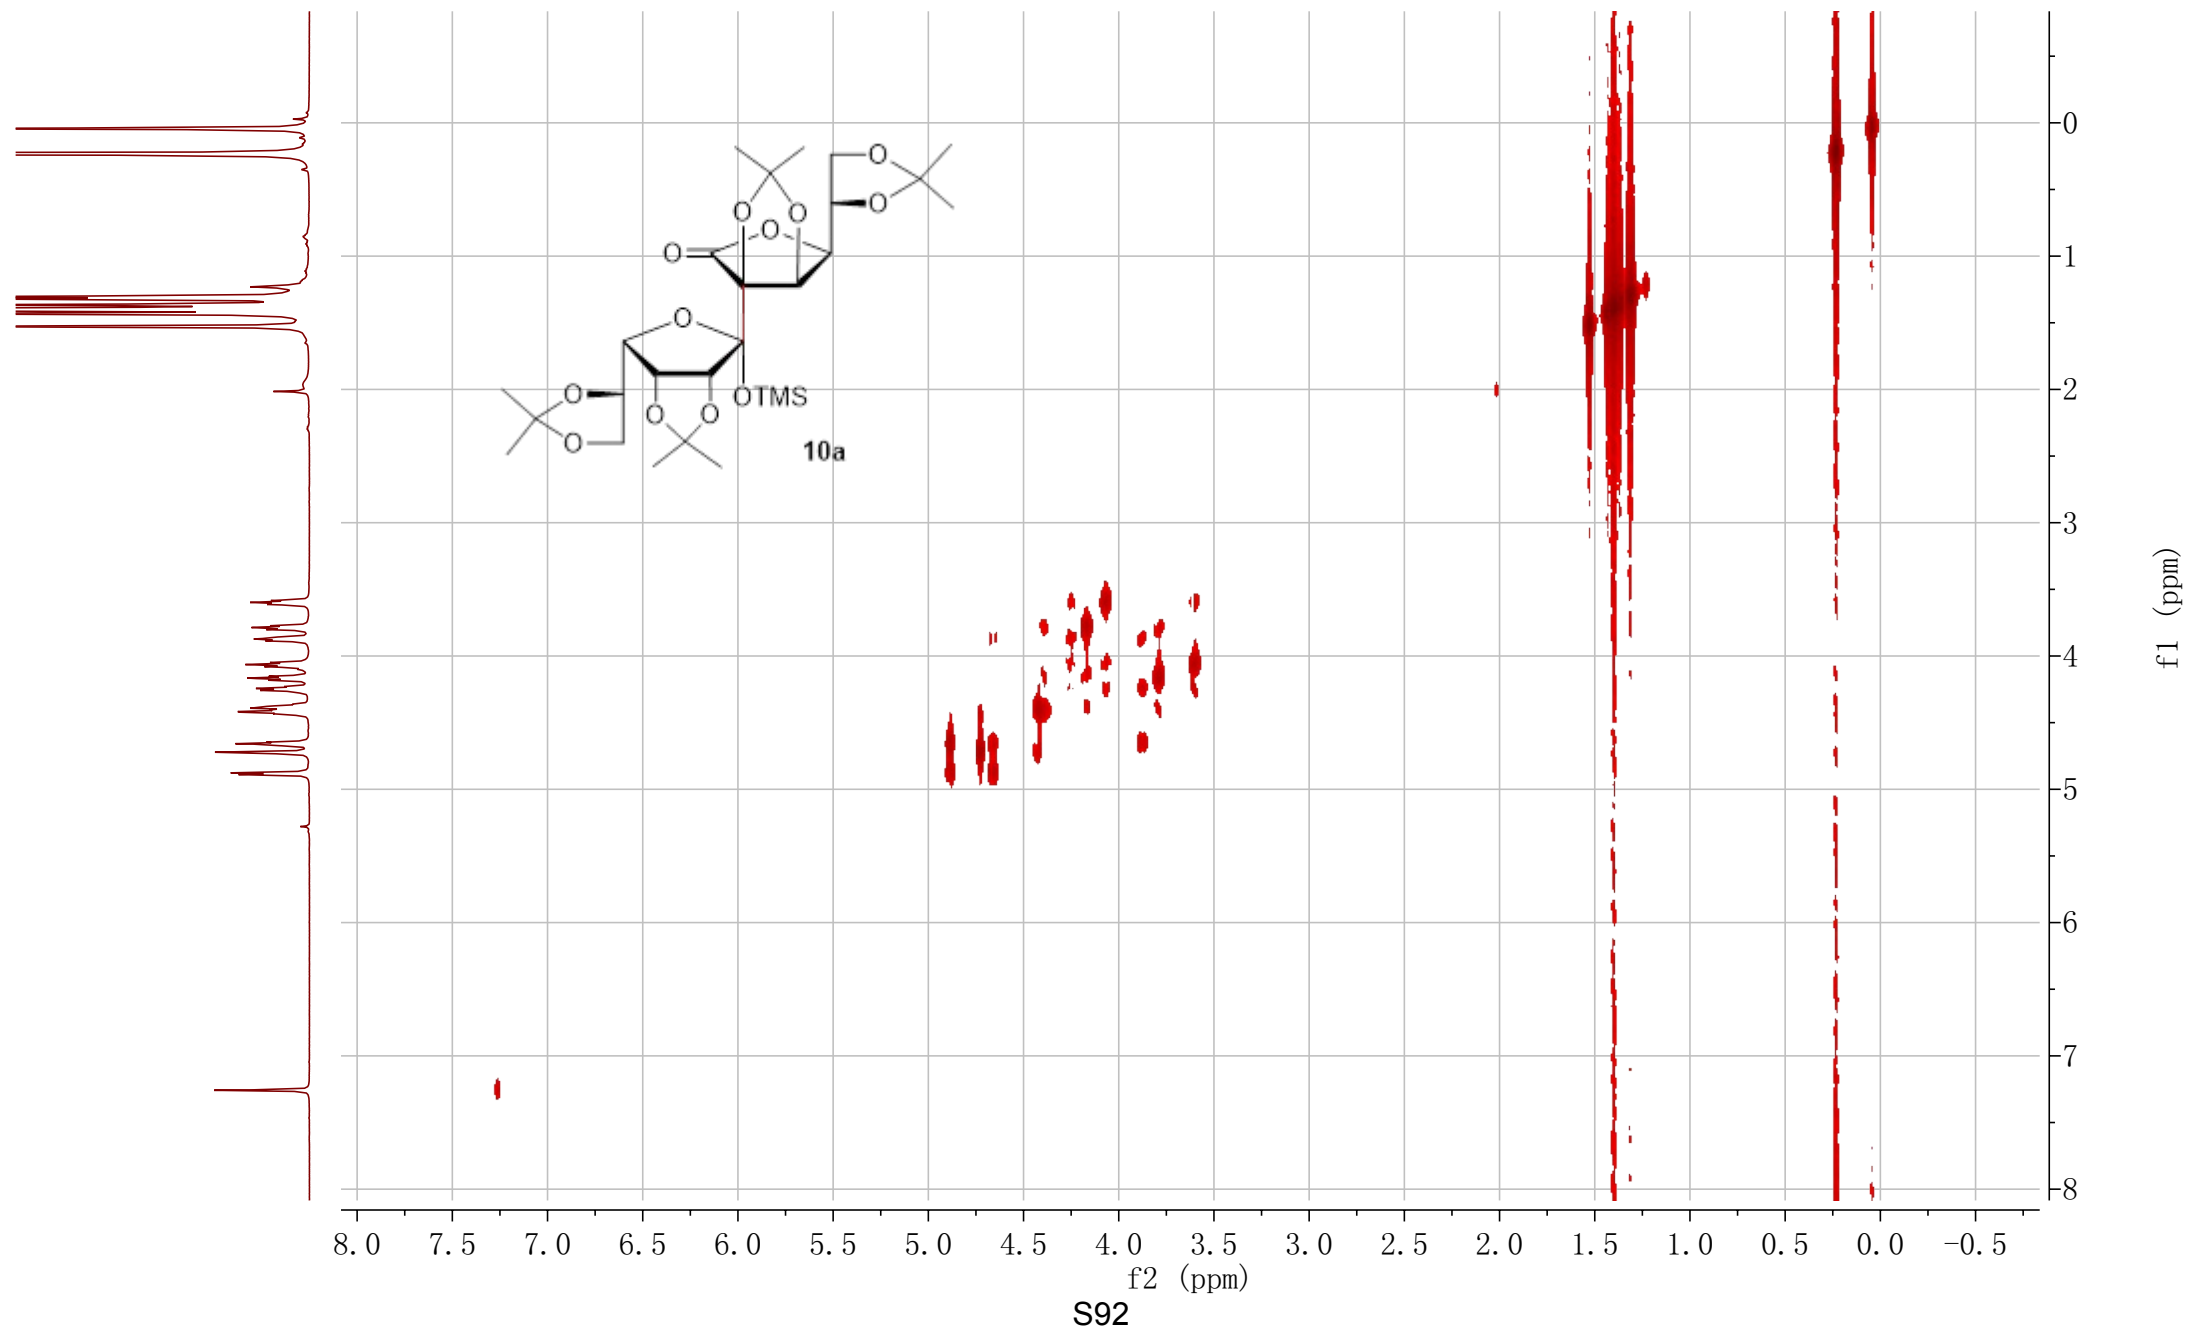

d-chloroform

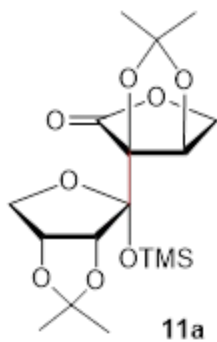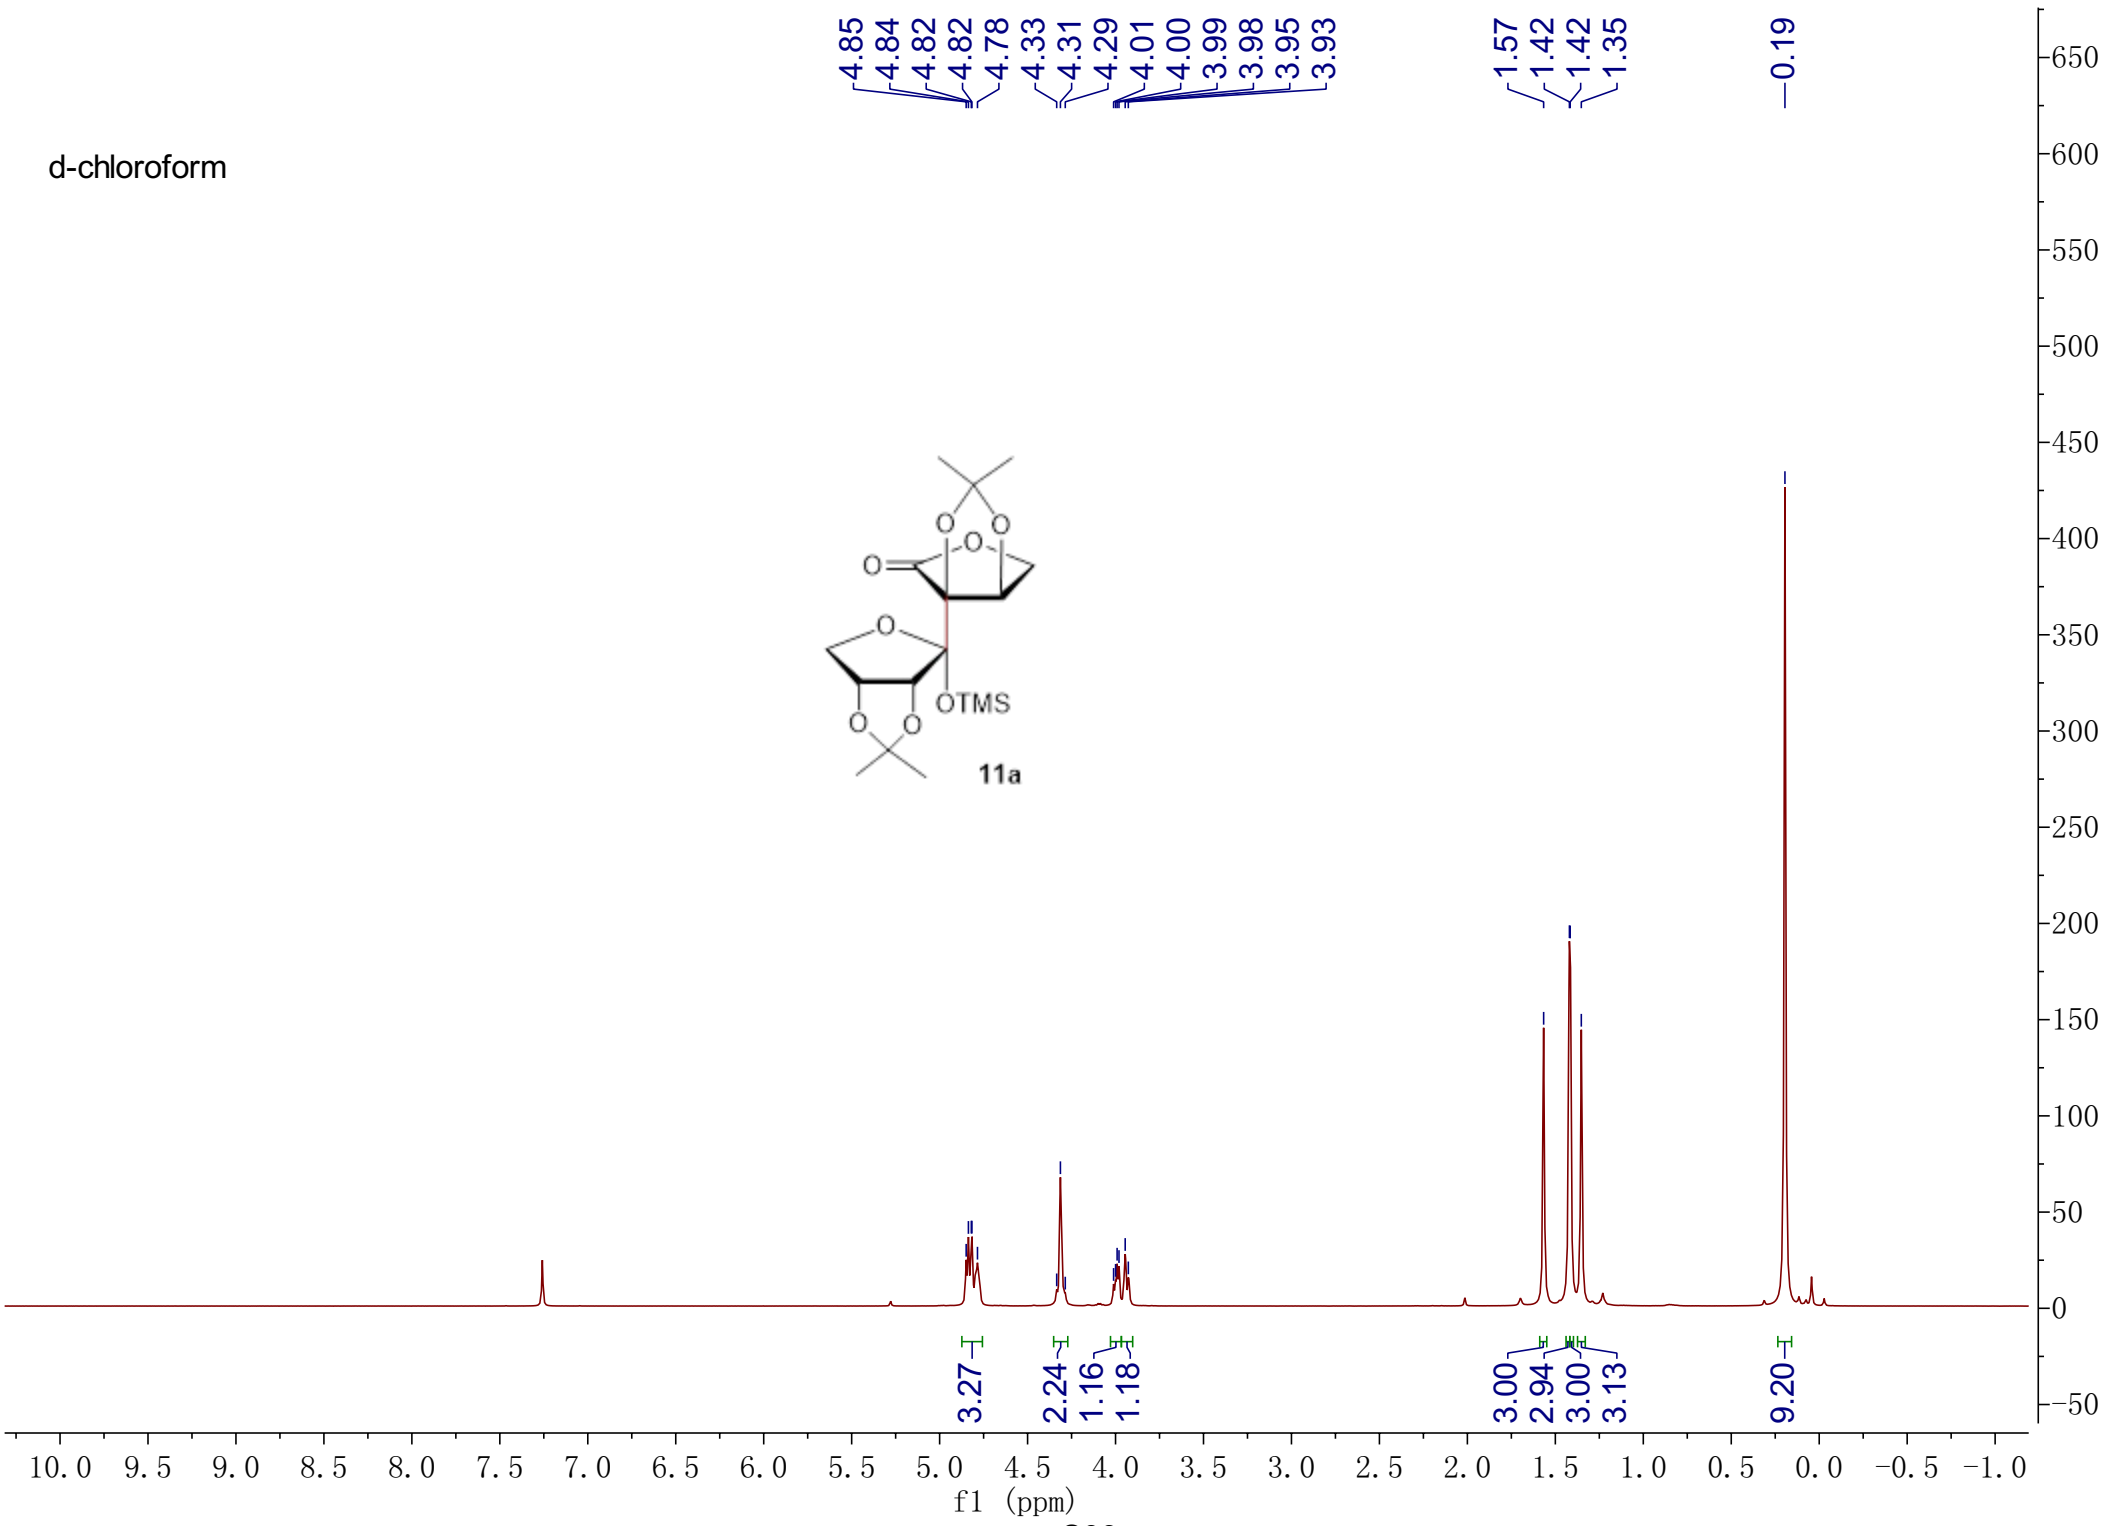

d-chloroform

-174.2

114.2  
113.1  
107.0

87.6  
80.8  
80.3  
78.6  
72.5  
70.6

27.2  
26.5  
25.8  
23.9

-1.9

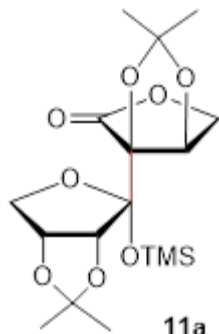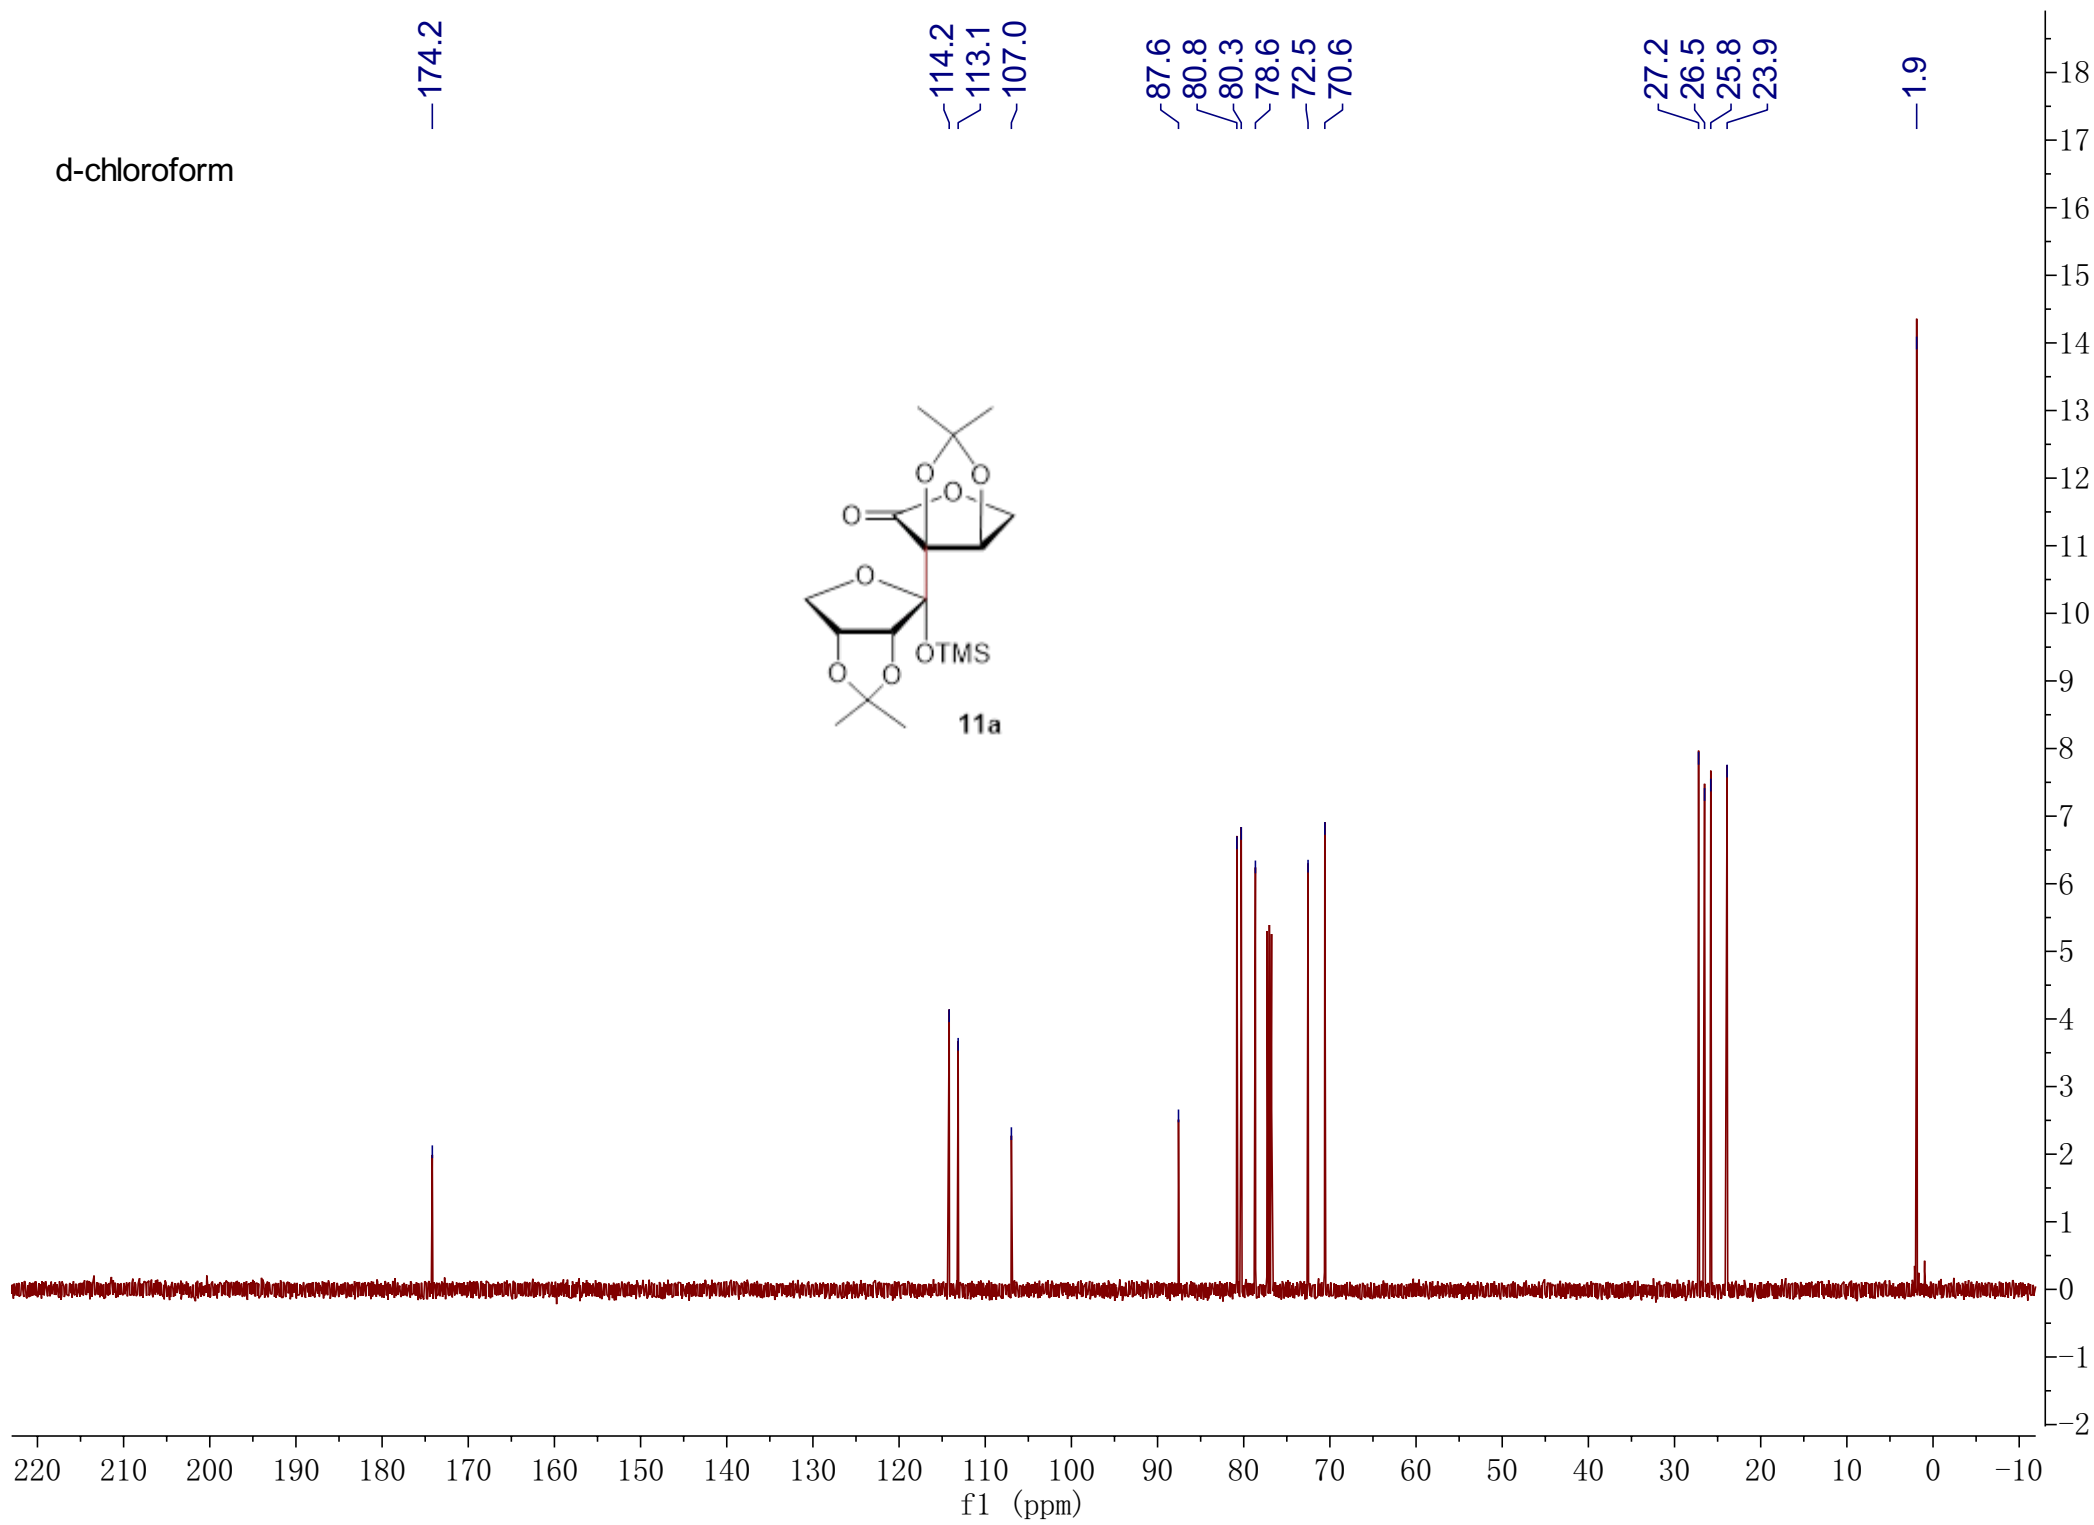

S94

COSY  
d-chloroform

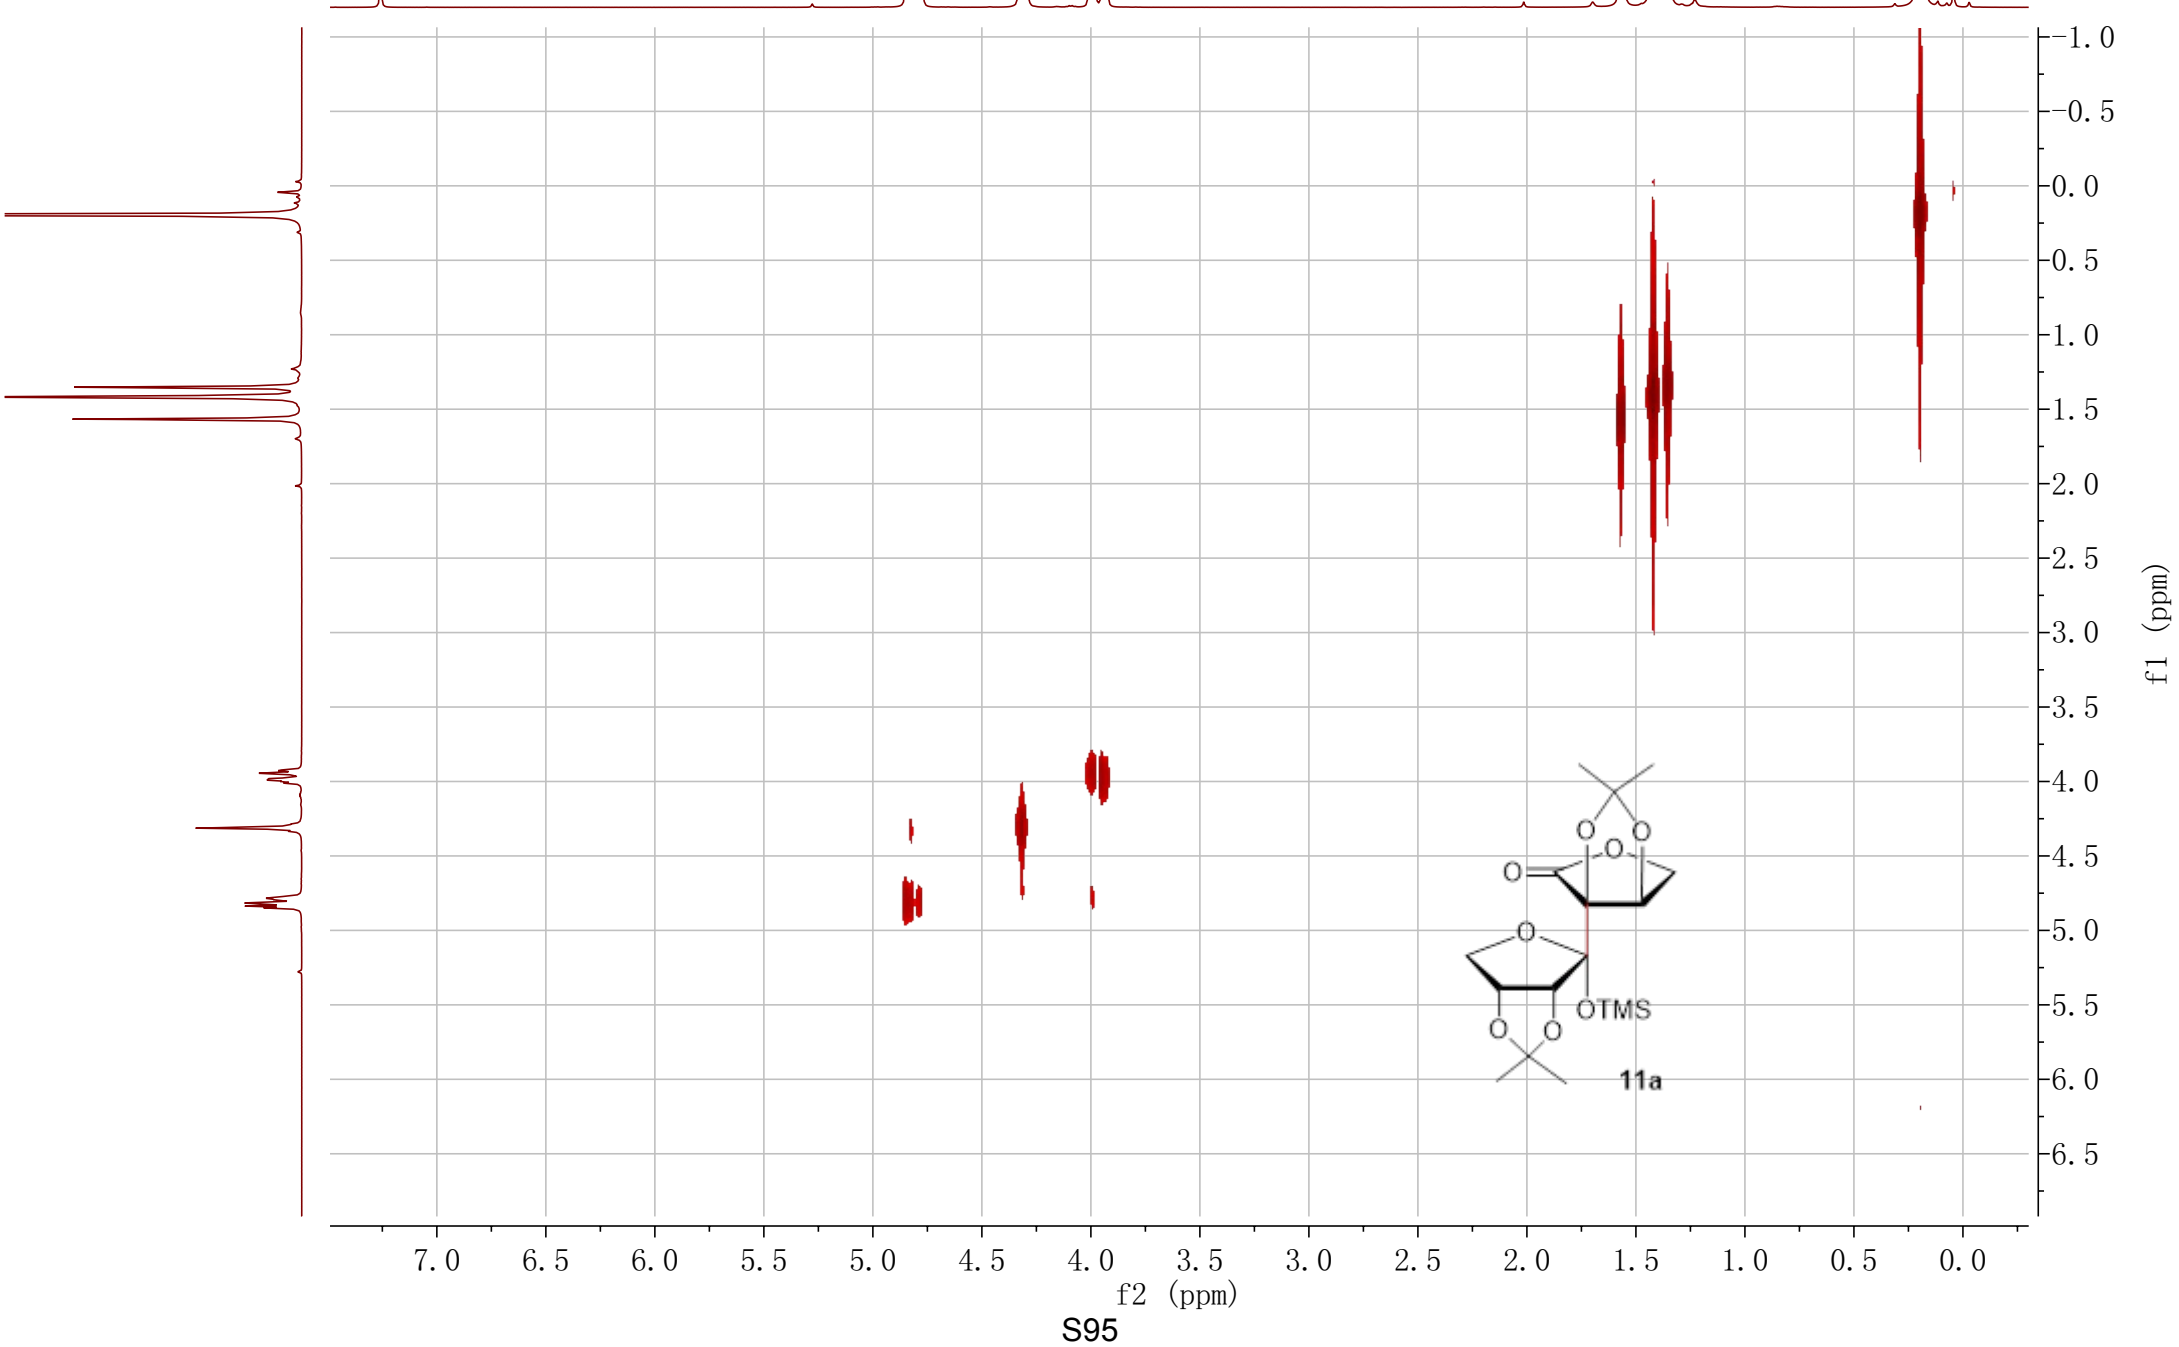

Supplement: c9cc09093b1.pdf [file c9cc09093b1.pdf]
